# Supplementary material
Source: PubMed Central journal article supplement (PMC2735232)

# Total Synthesis and Biological Investigation of Neopeltolide Leading to a Structural Reassignment and Analog Evaluations

Daniel W. Custar,<sup>†</sup> Thomas P. Zabawa,<sup>†</sup> John Hines,<sup>‡</sup> Craig M. Crews,<sup>‡</sup> and Karl A. Scheidt\*,<sup>†</sup>

<sup>†</sup>*Department of Chemistry, Chemistry of Life Processes Institute, Northwestern University, 2145 Sheridan Road, Evanston, Illinois 60208*

<sup>‡</sup>*Department of Molecular, Cellular, and Developmental Biology, Department of Chemistry, Department of Pharmacology, Yale University, New Haven, CT 06520*

## Supporting Information

### Table of Contents

|                                                                                                     |     |
|-----------------------------------------------------------------------------------------------------|-----|
| General Information.....                                                                            | S2  |
| Experimental Procedures and Characterization Data for Synthesis of Proposed Structure.....          | S3  |
| HPLC data for Racemic <b>15</b> .....                                                               | S4  |
| HPLC data for Enantioenriched <b>15</b> .....                                                       | S4  |
| Characterization Data for Diastereomer <b>34</b> .....                                              | S13 |
| Experimental Procedures and Characterization Data for Synthesis of Revised Structure.....           | S14 |
| Stereochemical proof of C11/C13 cis relationship of <b>39</b> .....                                 | S15 |
| Comparison of <sup>13</sup> C Spectral Data of Neopeltolide, <b>1</b> , and <b>2</b> .....          | S22 |
| Comparison of <sup>1</sup> H Spectral Data of Natural Neopeltolide and Synthetic Neopeltolide ..... | S23 |
| Selected NMR Spectra ( <sup>1</sup> H, <sup>13</sup> C, NOE, NOESY).....                            | S24 |

## General Information

All reactions were carried out under a nitrogen atmosphere in flame-dried glassware with magnetic stirring. THF was purified by passage through a bed of activated alumina.<sup>1</sup> Reagents were purified prior to use unless otherwise stated following the guidelines of Perrin and Armarego.<sup>2</sup> Purification of reaction products was carried out by flash chromatography using EM Reagent silica gel 60 (230-400 mesh). Analytical thin layer chromatography was performed on EM Reagent 0.25 mm silica gel 60-F plates. Visualization was accomplished with UV light and ceric ammonium nitrate stain, anisaldehyde, or potassium permanganate stain followed by heating. Infrared spectra were recorded on a Perkin Elmer 1600 series FT-IR spectrometer. Optical rotations were measured on a Perkin Elmer Model 341 polarimeter with a sodium lamp and are reported as follows:  $[\alpha]_{\lambda}^{T}$  (c = g/100 mL, solvent). <sup>1</sup>H NMR spectra were recorded on a Varian INOVA 500 (500 MHz) or a Bruker AVANCEIII 500 (500 MHz) spectrometer and are reported in ppm using solvent as an internal standard (CDCl<sub>3</sub> at 7.26 ppm). Data are reported as (s = singlet, d = doublet, t = triplet, q = quartet, m = multiplet, b = broad. All coupling constant(s) are reported in Hz. Proton-decoupled <sup>13</sup>C NMR spectra were recorded on Varian INOVA 500 (125 MHz), INOVA 400 (100 MHz), or Bruker AVANCEIII 500 (125 MHz) spectrometers and are reported in ppm using solvent as an internal standard (CDCl<sub>3</sub> at 77.0 ppm). Mass spectra data were obtained on a Varian 1200 Quadrupole Mass Spectrometer and Micromass Quadro II Spectrometer.

**Cell culture.** MCF-7 cells were a generous gift from Anton Bennett (Yale University, New Haven, CT) and were grown in RPMI 1640 medium supplemented with 10% heat-inactivated fetal bovine serum. PC12 cells were a gift from Randy Pittman (University of Pennsylvania, Philadelphia, PA) and were grown in RPMI 1640 medium supplemented with 10% heat-inactivated horse serum and 5% heat-inactivated fetal bovine serum. A549 and P-388 cells were obtained from the Yale Cancer Center: A549 cells were cultured in Ham's F-12K medium supplemented with 10% heat-inactivated fetal bovine serum, and P-388 cells were grown in RPMI 1640 medium supplemented with 10% heat-inactivated fetal bovine serum. HeLa and KB cells were purchased from ATCC (Manassas, VA): HeLa cells were grown in high glucose Dulbecco's Modified Eagle Medium supplemented with 10% heat-inactivated fetal bovine serum and KB cells were cultivated in minimal essential medium supplemented with Earle's salts, 2 mM glutamine, 1 mM sodium pyruvate and 0.1 mM non-essential amino acids. All culture medium was supplemented with 100 units/ml penicillin G and 100 μg/ml streptomycin sulfate. All cells were grown at 37°C in an atmosphere of 5% CO<sub>2</sub> and 95% O<sub>2</sub>.

**[<sup>3</sup>H]-thymidine incorporation.** Cells were seeded into 96 well plates in growth medium at a density of 4000 cells/well (10,000 cells/well for PC12 cells). After an overnight incubation to allow for cell attachment, the growth medium was removed and replaced with fresh medium containing serum and neopeltolide or the analog of interest at the specified concentration(s). In the case of P-388 cells, which are not adherent, the existing growth medium was rather overlaid with an equal volume of growth medium containing 2X the desired final concentration of neopeltolide or neopeltolide analog. After 20 hr, each well of cells received another 20 μl of

- 
1. Pangborn, A. B.; Giardello, M. A.; Grubbs, R. H.; Rosen, R. K.; Timmers, F. J. *Organomet.* **1996**, *15*, 1518-1520.
  2. Perrin, D. D. and Armarego, W. L. *Purification of Laboratory Chemicals*; 3rd Ed., Pergamon Press, Oxford. 1988.

medium containing 2  $\mu\text{Ci}$  of [ $^3\text{H}$ ]-thymidine (Perkin-Elmer, Boston, MA). Following another 4 h, the cells were harvested from the wells and passed through glass fiber filters using a Ska-Tron cell harvester (Molecular Devices, Sunnyvale, CA). The filters were transferred to vials, scintillant was added and the amount of radioactivity incorporated into the cells in the filters was quantified by scintillation counting. The resulting data was analyzed using PRISM software (GraphPad Software, Sand Diego, CA).

**Trypan blue-exclusion quantitation of cell density.** Following neopeltolide treatment as described above, a small 90  $\mu\text{l}$  aliquot of cells was withdrawn from each culture, combined with 10  $\mu\text{l}$  of 0.4% trypan blue in PBS and mixed. The density of cells per ml for each treatment group was then directly counted using a hemocytometer and light microscope.

**Cytotoxicity assay.** Following neopeltolide treatment as indicated, medium was supplemented with 330  $\mu\text{g/ml}$  MTS (3-(4,5-dimethylthiazol-2-yl)-5-(3-carboxymethoxyphenyl)-2-(4-sulfophenyl)-2H-tetrazolium)(Promega Corp.) and 25  $\mu\text{M}$  phenazine methosulfate and incubated at 37°C protected from light. Metabolic reduction of MTS to the colored formazan derivative was monitored by measuring the absorbance at 490 nm.

### Experimental Procedures and Characterization Data for Synthesis of Proposed Structure

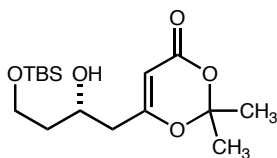

#### (S)-6-(4-(*tert*-butyldimethylsilyloxy)-2-hydroxybutyl)-2,2-dimethyl-4H-1,3-dioxin-4-one

**(15):** A mixture of (*R*)-BINOL (0.26 g, 0.9 mmol),  $\text{Ti}(i\text{-OPr})_4$  (271  $\mu\text{L}$ , 0.9 mmol), 4Å molecular sieves (2.11 g), and THF (11 mL) was stirred vigorously at room temperature under  $\text{N}_2$  for 60 minutes to yield a heterogeneous orange solution. The mixture was cooled to  $-78^\circ\text{C}$  and a solution of aldehyde **13** (1.14 g, 6.0 mmol) in THF (24 mL) was added via cannula and the resulting solution stirred for 30 min. Enol silane **14** (2.61 g, 12.2 mmol) was added dropwise to the solution and the mixture was stirred vigorously for 2 h at  $-78^\circ\text{C}$ . The mixture was then warmed to  $23^\circ\text{C}$  and allowed to stir for 12 h. Trifluoroacetic acid (2.5 mL) was added at  $-78^\circ\text{C}$  and the solution was allowed to warm to  $23^\circ\text{C}$ . Stirring continued for 1 h. The reaction mixture was diluted with EtOAc (60 mL) and saturated  $\text{NaHCO}_3$  was added dropwise until gas evolution ceased. The mixture was added to a separatory funnel containing brine (60 mL). The aqueous layer was extracted with EtOAc (3 x 20 mL). The organic layers were combined, dried over anhydrous  $\text{Na}_2\text{SO}_4$  and concentrated. The residue was purified by flash column chromatography (50% Et<sub>2</sub>O/hexanes) to afford  $\beta$ -hydroxy-dioxinone **15** (1.25 g, 63%, 88% ee) as a colorless oil. Analytical data for **15**: IR (film); 3462, 2953, 2857, 1728, 1635, 1386, 1255, 1205, 1091, 1012, 1091  $^1\text{H}$  NMR, (500 MHz,  $\text{CDCl}_3$ )  $\delta$  5.34 (s, 1H), 4.15 (bs, 1H), 3.93-3.89 (m, 1H), 3.85-3.83 (m, 1H), 2.43 (dd,  $J = 14.2, 7.81$  Hz, 1H), 2.34 (dd,  $J = 14.6, 4.88$  Hz, 1H), 1.8-1.65 (m, 2H), 1.70 (s, 3H), 1.69 (s, 3H), 0.89 (s, 9H), 0.08 (s, 1H);  $^{13}\text{C}$  NMR (125 MHz,  $\text{CDCl}_3$ )  $\delta$  169.3, 161.4, 106.7, 95.3, 69.332, 62.6, 41.8, 38.0, 26.0, 25.5, 24.9, 18.3, -5.3; LRMS (ESI): Mass calculated for  $\text{C}_{16}\text{H}_{30}\text{O}_5\text{SiNa}$   $[\text{M}+\text{Na}]^+$ , 353. Found  $[\text{M}+\text{Na}]^+$ , 353.  $[\alpha]_D^{25} = +17.5$  ( $\text{CHCl}_3$ ,  $c = 1.0$ ,

er = 94:6). Enantiomeric ratio was measured by HPLC (Chiralcel OD-H, 5% IPA/Hexanes,  $R_{t1}$  = 9.00,  $R_{t2}$  = 10.17).

### HPLC data for Racemic 15

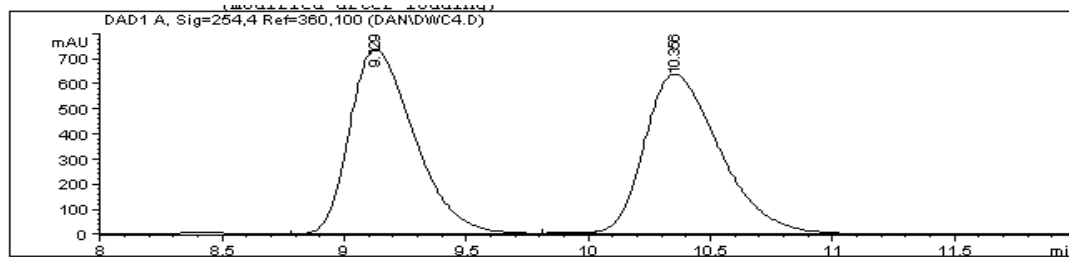

#### Area Percent Report

Sorted By : Signal  
Multiplier : 1.0000  
Dilution : 1.0000  
Use Multiplier & Dilution Factor with ISTDs

Signal 1: DAD1 A, Sig=254,4 Ref=360,100

| Peak # | RetTime [min] | Type | Width [min] | Area [mAU*s] | Height [mAU] | Area %  |
|--------|---------------|------|-------------|--------------|--------------|---------|
| 1      | 9.129         | PB   | 0.2846      | 1.36087e4    | 739.80609    | 49.8181 |
| 2      | 10.356        | BB   | 0.3311      | 1.37080e4    | 636.91742    | 50.1819 |

### HPLC data for Enantioenriched 15

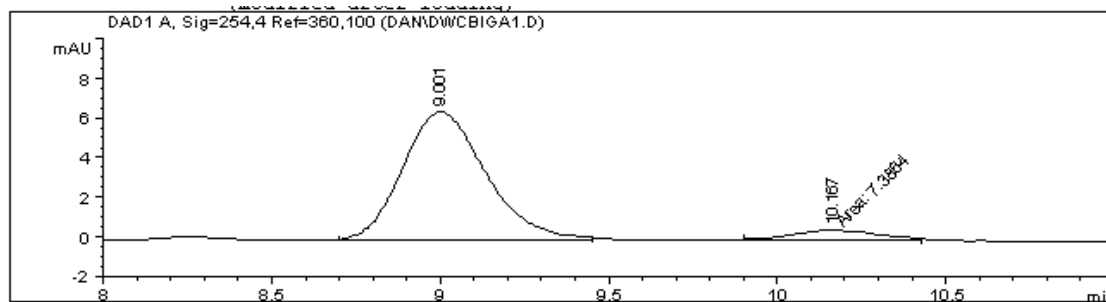

#### Area Percent Report

Sorted By : Signal  
Multiplier : 1.0000  
Dilution : 1.0000  
Use Multiplier & Dilution Factor with ISTDs

Signal 1: DAD1 A, Sig=254,4 Ref=360,100

| Peak # | RetTime [min] | Type | Width [min] | Area [mAU*s] | Height [mAU] | Area %  |
|--------|---------------|------|-------------|--------------|--------------|---------|
| 1      | 9.001         | BB   | 0.2575      | 110.30457    | 6.45201      | 93.7239 |
| 2      | 10.167        | MM   | 0.2787      | 7.38640      | 4.41689e-1   | 6.2761  |

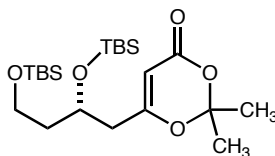

**(S)-6-(2,4-bis(*tert*-butyldimethylsilyloxy)butyl)-2-hydroxybutyl)-2,2-dimethyl-4H-1,3-dioxin-4-one (46):** To a 0 °C solution of **15** (1.63 g, 4.9 mmol) in CH<sub>2</sub>Cl<sub>2</sub> (52 mL) was added 2,6-lutidine (1.7 mL, 14.8 mmol) and TBSOTf (2.0 mL, 8.9 mmol). The resulting solution was stirred at 0 °C for 1 h and quenched by the addition of saturated NaHCO<sub>3</sub> (80 mL). The aqueous layer was extracted with EtOAc (3 x 15 mL). The combined organic layers were dried over anhydrous Na<sub>2</sub>SO<sub>4</sub>, filtered and concentrated. The resulting residue was purified by flash column chromatography (40% Et<sub>2</sub>O/hexanes) to afford silyl ether **46** (1.98 g, 91%) as a clear oil. Analytical data for **46**: IR (film) 2955, 2932, 2858, 1734, 1636, 1386, 1254, 836, 776 cm<sup>-1</sup>; <sup>1</sup>H NMR (500 MHz, CDCl<sub>3</sub>) δ 5.28 (s, 1H), 4.15-4.13 (m, 1H), 3.68 (dd, *J* = 6.3, 5.8 Hz, 2H), 2.40 (ddd, *J* = 20.0, 14.1, 5.86 Hz, 2H), 1.72-1.66 (m, 2H), 1.70 (s, 3H), 1.68 (s, 3H), 0.90 (s, 9H), 0.88 (s, 9H), 0.08 (s, 3H), 0.07 (s, 3H), 0.06 (s, 6H); <sup>13</sup>C NMR (125 MHz, CDCl<sub>3</sub>) δ 169.5, 161.4, 106.5, 95.6, 66.8, 59.3, 42.4, 40.3, 26.1, 26.0, 25.9, 24.7, 18.4, 18.2, -4.3, -5.1; LRMS (ESI): Mass calculated for C<sub>22</sub>H<sub>44</sub>O<sub>5</sub>Si<sub>2</sub>Na [M+Na]<sup>+</sup>, 468. Found [M+Na], 468. [α]<sub>D</sub><sup>25</sup> = +3.1 (CHCl<sub>3</sub>, *c* = 0.3).

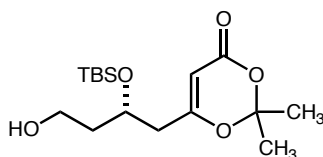

**(S)-6-(2-(*tert*-butyldimethylsilyloxy)-4-hydroxybutyl)-2,2-dimethyl-4H-1,3-dioxin-4-one (16):** To a 23 °C solution of **46** (1.82 g, 4.1 mmol) in EtOH (178 mL) was added pPTs (2.48 g, 9.8 mmol). The resulting mixture was stirred vigorously for 24 h. Brine (4 mL) was added to the reaction mixture and the solvent was removed *in vacuo* and the resulting residue was diluted with EtOAc (100 mL) and added to a separatory funnel containing brine (100 mL). The aqueous layer was extracted with EtOAc (4 x 15 mL). The organic layers were combined and dried with anhydrous Na<sub>2</sub>SO<sub>4</sub>, filtered and concentrated. The resulting residue was purified by flash column chromatography (50% Et<sub>2</sub>O/hexanes) to afford **16** (1.28 g, 83%) as a clear oil. Analytical data for **16**: IR (film) 3452, 2932, 2858, 1728, 1633, 1388, 1205, 1015, 835, 776 cm<sup>-1</sup>; <sup>1</sup>H NMR (500 MHz, CDCl<sub>3</sub>) δ 5.29 (s, 1H), 4.23-4.18 (m, 1H), 3.83-3.73 (m, 1H), 2.45 (dddd, *J* = 22.9, 20.0, 14.1, 5.85, 2H), 1.98 (bs, 1H), 1.88-1.81 (m, 1H), 1.75-1.65 (m, 2H), 1.71 (s, 3H), 1.69 (s, 3H), 0.89 (s, 9H), 0.11 (s, 3H), 0.09 (s, 3H); <sup>13</sup>C NMR (125 MHz, CDCl<sub>3</sub>) δ 168.9, 161.3, 128.6, 106.7, 95.7, 68.2, 59.6, 42.1, 38.9, 25.9, 24.7, 18.2, -4.5; LRMS (ESI): Mass calculated for C<sub>16</sub>H<sub>30</sub>O<sub>5</sub>SiNa [M+Na]<sup>+</sup>, 353. Found [M+Na] 353. [α]<sub>D</sub><sup>25</sup> = -2.7 (CHCl<sub>3</sub>, *c* = 1.0).

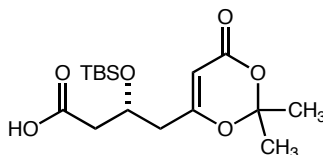

**(R)-3-(*tert*-butyldimethylsilyloxy)-4-(2,2-dimethyl-4-oxo-4H-1,3-dioxin-6-yl)butanoic acid (7):** To a 23 °C solution of **16** (0.45 g, 1.36 mmol) in DMF (21 mL) was added PDC (2.61 g, 12.3 mmol). The resulting mixture was stirred vigorously for 3 h. The reaction mixture was then diluted with Et<sub>2</sub>O (20 mL) and then passed through a short plug of MgSO<sub>4</sub> (eluting with Et<sub>2</sub>O). H<sub>2</sub>O (450 mL) was then added to the filtrate and the aqueous layer was extracted with Et<sub>2</sub>O (5 x 20 mL). The combined organic layers were combined and dried with anhydrous

Na<sub>2</sub>SO<sub>4</sub>, filtered and concentrated to afford carboxylic acid **7** (44 mg, 97%) as a colorless oil. Carboxylic acid **7** was used directly in the next step. Analytical data: IR (film) 3101, 2931, 2857, 1734, 1635, 1388, 1205, 1092, 1015, 833, 777 cm<sup>-1</sup>; <sup>1</sup>H NMR (500 MHz, CDCl<sub>3</sub>) δ 5.32 (s, 1H), 4.42-4.40 (m, 1H), 2.59 (d, *J* = 5.86, 2H), 2.49 (d, *J* = 5.86 Hz, 2H), 1.72 (s, 3H), 1.70 (s, 3H), 1.26 (s, 1H), 0.88 (s, 9H), 0.10 (s, 3H), 0.09 (s, 3H); <sup>13</sup>C NMR (125 MHz) δ 176.3, 168.2, 161.1, 106.8, 96.1, 66.5, 42.2, 41.9, 29.9, 25.9, 25.8, 24.7, 18.1, -4.7; LRMS (ESI): Mass calculated for C<sub>16</sub>H<sub>28</sub>O<sub>6</sub>SiNa [M+Na]<sup>+</sup>, 367. Found [M+Na] 367. [α]<sub>D</sub><sup>25</sup> = +3.3 (CHCl<sub>3</sub>, c = 0.6).

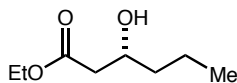

**(R)-Ethyl 3-hydroxyhexanoate.** A stainless steel stirred autoclave was charged with [RuCl<sub>2</sub>(benzene)]<sub>2</sub> (402 mg, 0.80 mmol) and (*R*)-tol-BINAP (1145 mg, 1.69 mmol). The vessel was sealed and repeatedly pressure purged with argon (ca. 20 × 30 psig). Argon sparged absolute ethanol (950 mL) and ethyl 3-oxohexanoate (109.35 g, 682.6 mmol) were then added via cannula into the reaction vessel under argon. The vessel was sealed and pressure purged with argon and then hydrogen. The reactor was pressurized to and maintained at about 50 psig using a pressure regulator fed by a small high-pressure reservoir of hydrogen. The reaction mixture was vigorously stirred and heated to 100 °C. Hydrogen uptake was complete within about 30 min. of reaching 100 °C after which heating continued for an additional 1 h. After cooling and release of pressure, the orange product mixture was filtered and the filtrate was evaporated. Chiral GC (FID) analysis of the unpurified product mixture revealed 97% ee. Vacuum distillation at about 125-130 °C/90 mmHg afforded 102.9 g (94%) of a clear, colorless oil. <sup>1</sup>H NMR (400 MHz, CDCl<sub>3</sub>) δ 4.16 (q, *J* = 7.1 Hz, 2H) 4.01 (m, 1H) 3.23 (s, 1H) 2.48 (dd, *J* = 16.2, 3.6 Hz, 1H) 2.40 (dd, *J* = 16.2, 8.6 Hz, 1H) 1.32-1.58 (m, 4H) 1.27 (dd, *J* = 7.1, 7.1 Hz, 3H) 0.93 (dd, *J* = 7.1, 7.1 Hz, 3H). <sup>13</sup>C NMR (100 MHz, CDCl<sub>3</sub>) δ 172.2, 67.6, 60.4, 41.5, 38.7, 18.8, 14.3, 14.1.

Chiral GC analysis was performed using an Agilent 6850 gas chromatograph equipped with an FID detector, Chiraldex β-cyclodextrin-DB (30m x 0.25 mm) column, and a split injection port (50:1). Helium was used as the carrier gas at a constant 2 mL/min. The column oven was initially held at 60 °C for 1 min then ramped to 120 °C at 2 °C/min. The chromatographic separation was checked using racemic ethyl 3-hydroxyhexanoate prepared analogously using racemic BINAP. The predominant isomer eluted second after about 25.2 min and was assigned to the *R*-configuration based upon literature precedent<sup>3</sup> and Mosher ester analysis.

3. (a) Kitamura, M.; Tokunaga, M.; Ohkuma, T.; Noyori, R. *Org. Synth.* **1993**, *71*, 1. (b) Deng, L. S.; Huang, X. P.; Zhao, G. *J. Org. Chem.* **2006**, *71*, 4625.

Beta-CD-DB (30m x 0.25mm): inj. Temp = 200°C, Det Temp = 250°C, oven:  
60°C 1 min then to 120°C @  
2°C/min. 0min. hold.; const. 2.0 mL/min He; 50:1

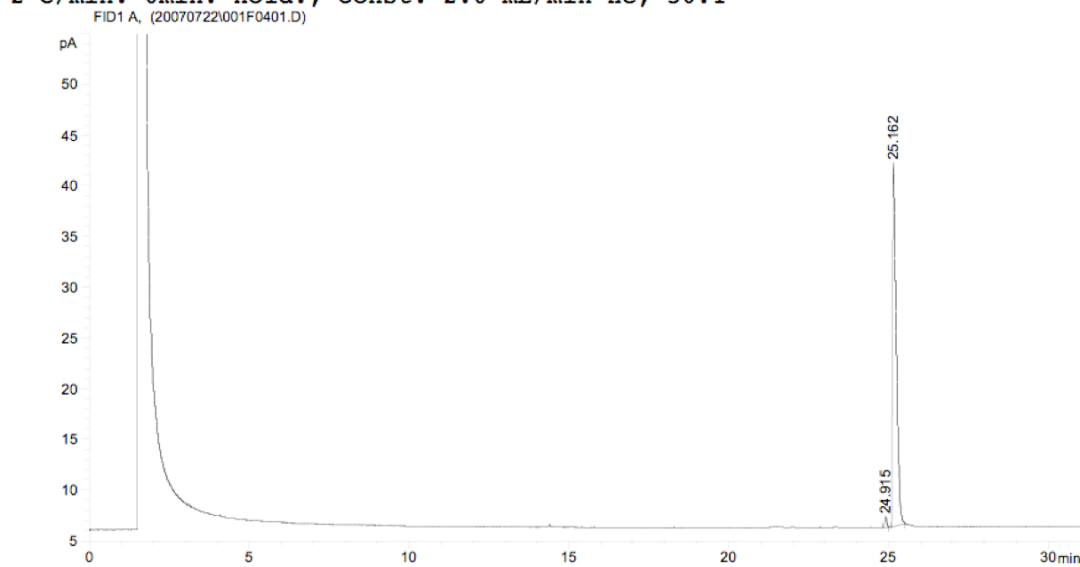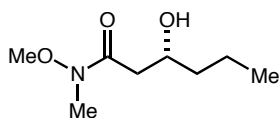

**(R)-3-hydroxy-N-methoxy-N-methylhexanamide (47):** Weinreb's amine<sup>4</sup> (MeONHMe·HCl) (4.00 g, 41.0 mmol) was azeotroped with benzene 3 times, dried *in vacuo* for 30 min, and dissolved in THF (20 mL). (*R*)-Ethyl-3-hydroxyhexanoate (2.12 g, 13.2 mmol) was then added and the mixture was cooled to  $-20\text{ }^{\circ}\text{C}$  (dry ice/benzyl alcohol). *i*-PrMgCl (2.0 M solution in THF, 39.7 mL) was then added dropwise over 30 min via cannula, and the mixture was stirred for an additional 45 min at  $-20\text{ }^{\circ}\text{C}$ . The bath was then removed and the mixture stirred for 1 h at  $23\text{ }^{\circ}\text{C}$ . The reaction was quenched with the dropwise addition of 20% aqueous  $\text{NH}_4\text{Cl}$  (40 mL). The aqueous layer was then extracted with EtOAc (3 x 40 mL), the organic layers combined, dried over anhydrous  $\text{Na}_2\text{SO}_4$ , filtered and concentrated. The residue was purified by flash column chromatography (20%-40% gradient EtOAc/hexanes) to afford amide **47** (1.97 g, 85%) as a colorless oil. Analytical data for **47**: IR (film) 3448, 2958, 2936, 2874, 1647, 1420, 1388, 1122, 1178,  $1000\text{ cm}^{-1}$ ;  $^1\text{H}$  NMR (500 MHz,  $\text{CDCl}_3$ )  $\delta$  4.00 (m, 1H), 3.78 (s, 1H), 3.66 (s, 3H), 3.16 (s, 3H), 2.63 (d,  $J = 16.5\text{ Hz}$ , 1H), 2.42 (dd,  $J = 17.0, 9.5\text{ Hz}$ , 1H), 1.56-1.44 (m, 2H), 1.38 (dddd,  $J = 22.0, 15.5, 15.5, 4.0\text{ Hz}$ , 2H), 0.90 (dd,  $J = 7.5, 7.5\text{ Hz}$ , 3H);  $^{13}\text{C}$  NMR (125 MHz,  $\text{CDCl}_3$ )  $\delta$  174.1, 67.7, 61.4, 38.8, 38.3, 31.9, 18.9, 14.2; LRMS (ESI): Mass calculated for  $\text{C}_{16}\text{H}_{34}\text{N}_2\text{O}_6\text{Na}$  [ $2\text{M}+\text{Na}$ ]<sup>+</sup>, 373. Found [ $2\text{M}+\text{Na}$ ], 373;  $[\alpha]_{\text{D}}^{25} = -42.4$  ( $\text{CHCl}_3$ ,  $c = 0.79$ ).

4. Nahm, S.; Weinreb, S. M. *Tetrahedron Lett.* **1981**, 22, 3815-3818.

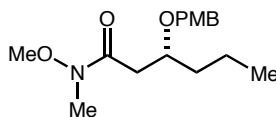

**(R)-3-(4-methoxybenzyloxy)-N-methoxy-N-methylhexanamide (18):** Amide **47** (1.40 g, 8.00 mmol) was dissolved in cyclohexane (7 mL) and  $\text{CH}_2\text{Cl}_2$  (3 mL) and cooled to 0 °C. Freshly prepared PMB-imidate (2.71 g, 9.60 mmol) was dissolved in  $\text{CH}_2\text{Cl}_2$  (2 mL) and added dropwise, followed by the addition of pPTs (0.10 g, 0.40 mmol) in one portion. The mixture was then warmed to 23 °C and stirred for 8 h after which an additional portion of pPTs was added (0.10 g, 0.40 mmol). This mixture was stirred for an additional 7 h, and then plug filtered through a pad of silica (20% EtOAc/hexanes), and the filtrate washed with saturated aqueous  $\text{NaHCO}_3$  and brine then dried over anhydrous  $\text{Na}_2\text{SO}_4$ , filtered and concentrated. The residue was purified by flash column chromatography (15%-30% gradient EtOAc/hexanes) to afford amide **18** (1.87 g, 80%) as a yellow oil. Analytical data for **18**: IR (film) 3287, 2960, 2872, 1732, 1661, 1614, 1515, 1462, 1385, 1249, 1175, 1036  $\text{cm}^{-1}$ ;  $^1\text{H}$  NMR (500 MHz,  $\text{CDCl}_3$ )  $\delta$  7.20 (d,  $J = 8.5$  Hz, 2H), 6.80 (d,  $J = 7.5$  Hz, 2 H), 4.45 (A of ABq,  $J_{\text{AB}} = 10.5$  Hz, 1H), 4.41 (B of ABq,  $J_{\text{AB}} = 10.5$  Hz, 1H), 3.92 (ddd,  $J = 11.5, 5.5, 5.5$  Hz, 1H), 3.72 (s, 3H), 3.60 (s, 3H), 3.14 (s, 3H), 2.80 (dd,  $J = 14.5, 6.5$  Hz, 1H), 2.41 (dd,  $J = 15.5, 4.5$  Hz, 1H), 1.58-1.39 (m, 3 H), 1.33 (dddd,  $J = 23.5, 13.5, 13.5, 6.5$  Hz, 1H), 0.87 (dd,  $J = 7.5, 7.5$  Hz, 3H);  $^{13}\text{C}$  NMR (125 MHz,  $\text{CDCl}_3$ )  $\delta$  172.6, 159.0, 130.8, 129.3, 113.6, 75.7, 71.5, 61.2, 55.1, 37.2, 37.1, 32.0, 18.6, 14.1; LRMS (ESI): Mass calculated for  $\text{C}_{32}\text{H}_{50}\text{N}_2\text{O}_8\text{Na}$  [2M+Na] $^+$ , 614. Found [2M + Na], 613;  $[\alpha]_{\text{D}}^{25} = +8.5$  ( $\text{CHCl}_3$ ,  $c = 1.0$ ).

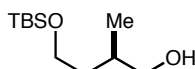

**(R)-4-(tert-butyldimethylsilyloxy)-2-methylbutan-1-ol (48):** Diisopropylamine (23.8 g, 32.9 mL, 234 mmol), was dissolved in THF (200 mL) and cooled to -78 °C. A solution of *n*-butyllithium (1.59 M in hexanes, 137 mL) was added dropwise by syringe and the solution was stirred for 10 min at -78 °C, then warmed to 0 °C and stirred for an additional 15 min. Ammonia-borane complex (6.90 g, 224 mmol) was then added in one portion and the mixture stirred for 15 min at 0 °C, then warmed to 23 °C and stirred for an additional 15 min. The mixture was then cooled back down to 0 °C and [1*S*(*R*),2*S*]-*N*-(2-Hydroxy-1-methyl-2-phenylethyl)-4-(*tert*-butyldimethylsilyloxy)-*N*,2-dimethylbutanamide<sup>5</sup> (21.2 g, 55.9 mmol) dissolved in THF (120 mL) was added via cannula, and the mixture was warmed to 23 °C and stirred for 2 h. The mixture was then cooled to 0 °C and quenched with the addition of 0.01 M HCl (500 mL). This mixture was then extracted with EtOAc (3 x 200 mL) and the organic layers were combined, washed with 0.1 M HCl (100 mL), 1 M NaOH (100 mL), brine (100 mL) then dried over anhydrous  $\text{Na}_2\text{SO}_4$ , filtered and concentrated. The residue was purified by flash column chromatography (10% EtOAc/hexanes) to afford alcohol **48** (11.3 g, 90%) as a colorless oil. Analytical data for **48**: IR (film) 3352, 2930, 2859, 1464, 1389, 1253, 1095, 1085, 1044, 1001, 835, 776  $\text{cm}^{-1}$ ;  $^1\text{H}$  NMR (500 MHz,  $\text{CDCl}_3$ )  $\delta$  3.72 (ddd,  $J = 10.5, 6.0, 6.0$  Hz, 1H), 3.62 (ddd,  $J = 7.5, 7.5, 4.0$  Hz, 1H), 3.45 (ddd,  $J = 16.5, 5.5, 5.5$  Hz, 1H), 3.37 (ddd,  $J = 15.0, 4.0, 4.0$  Hz, 1H), 3.29 (s 1H), 1.75 (ddd,  $J = 12.5, 12.5, 6.5$  Hz, 1H), 1.56-1.44 (m, 2H), 0.88 (d,  $J = 7.0$  Hz,

5. Myers, A. G.; McKinstry, L. *J. Org. Chem.* **1996**, *61*, 2428-2440.



3H), 0.86 (s, 9H), 0.03 (s, 6H);  $^{13}\text{C}$  NMR (125 MHz,  $\text{CDCl}_3$ )  $\delta$  68.2, 61.9, 37.6, 34.4, 26.0, 18.4, 17.5, -5.3; LRMS (ESI): Mass calculated for  $\text{C}_{11}\text{H}_{26}\text{O}_2\text{Si}$   $[\text{M}]^+$ , 218. Found  $[\text{M}]$ , 218;  $[\alpha]_{\text{D}}^{25} = +9.8$  ( $\text{CHCl}_3$ ,  $c = 1.0$ ).

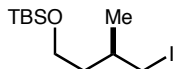

**((R)-4-iodo-3-methylbutoxy)(tert-butyl)dimethylsilane (19):** Triphenylphosphine (8.21 g, 31.3 mmol) was dissolved in  $\text{CH}_2\text{Cl}_2$  (130 mL) and imidazole (2.66 g, 39.2 mmol) was added in one portion followed by  $\text{I}_2$  (9.27 g, 36.5 mmol). A solution of alcohol **48** in  $\text{CH}_2\text{Cl}_2$  (50 mL) was then added via cannula and the mixture stirred for 15 min at 23 °C. The solvent was removed *in vacuo* and the residue was purified by flash column chromatography (5%  $\text{Et}_2\text{O}$ /hexanes) to afford iodide **19** (6.02 g, 70%) as a tan oil. Analytical data for **19**: IR (film) 3746, 2929, 2857, 2362, 1652, 1464, 1253, 1099, 834, 775  $\text{cm}^{-1}$ ;  $^1\text{H}$  NMR (500 MHz,  $\text{CDCl}_3$ )  $\delta$  3.63 (dddd,  $J = 16.5, 10.5, 10.5, 6.0$  Hz, 2H), 3.27 (dd,  $J = 9.5, 4.5$  Hz, 1H), 3.19 (dd,  $J = 10.0, 6.0$  Hz, 1H), 1.67-1.56 (m, 2H), 1.42 (ddd,  $J = 13.0, 13.0, 6.5$  Hz, 1H), 0.98 (d,  $J = 6.5$  Hz, 3H), 0.88 (s, 9H), 0.04 (s, 6H);  $^{13}\text{C}$  NMR (125 MHz,  $\text{CDCl}_3$ )  $\delta$  60.8, 39.9, 31.5, 26.1, 20.8, 18.4, 18.4, -5.1;  $[\alpha]_{\text{D}}^{25} = -4.9$  ( $\text{CHCl}_3$ ,  $c = 1.0$ ).

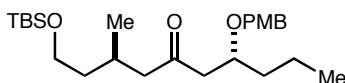

**(3R,7R)-1-(tert-butyl dimethylsilyloxy)-7-(4-methoxybenzyloxy)-3-methyldecane-5-one (20):** Iodide **19** (2.04 g, 6.20 mmol) was azeotroped with benzene 3 times then dissolved in pentane (freshly distilled from  $\text{CaH}_2$ , 35 mL) and ether (25 mL) and cooled to -78 °C. A solution of *t*-butyllithium (1.7 M in pentane, 7.30 mL) was added dropwise and the mixture was stirred at -78 °C for 15 min, then warmed to 0 °C for 20 min (after which a white precipitate was generated). The solution was cooled back down to -78 °C and a solution of amide **18** (1.02 g, 3.45 mmol) in THF was cooled to -78 °C and added via cannula (dripped along the side of the cooled reaction flask). This mixture was stirred for 15 min at -78 °C. The reaction was quenched at low temperature with the addition of saturated aqueous  $\text{NH}_4\text{Cl}$  (50 mL). Upon warming to ambient temperature, the mixture was extracted with  $\text{EtOAc}$  (3 x 50 mL), the organic layers combined, dried over anhydrous  $\text{Na}_2\text{SO}_4$ , filtered and concentrated. The residue was purified by flash column chromatography (3%-10% gradient  $\text{EtOAc}$ /hexanes) to afford ketone **20** (0.74 g, 50%) as a colorless oil. Analytical data for **20**: IR (film) 2957, 2860, 2362, 1713, 1614, 1514, 1465, 1362, 1302, 1250, 1094, 1039, 835  $\text{cm}^{-1}$ ;  $^1\text{H}$  NMR (500 MHz,  $\text{CDCl}_3$ )  $\delta$  7.22 (d,  $J = 8.0$  Hz, 2H), 6.84 (d,  $J = 8.5$  Hz, 2H), 4.42 (s, 2H), 3.92 (ddd,  $J = 11.5, 6.0, 6.0$  Hz, 1H), 3.77 (s, 3H), 3.62 (dddd,  $J = 7.5, 7.5, 7.5, 6.0$  Hz, 2H), 2.71 (dd,  $J = 16.5, 7.5$  Hz, 1H), 2.43 (dddd,  $J = 25.0, 9.0, 9.0, 9.0$  Hz, 2H), 2.24 (dd,  $J = 16.0, 8.0$  Hz, 1H), 2.15 (ddd,  $J = 13.5, 13.5, 6.5$  Hz, 1H), 1.55-1.44 (m, 4H), 1.43-1.33 (m, 2H), 0.95-0.86 (m, 6H), 0.88 (s, 9H), 0.03 (s, 6H);  $^{13}\text{C}$  NMR (125 MHz,  $\text{CDCl}_3$ )  $\delta$  209.8, 159.4, 131.0, 129.6, 113.9, 75.3, 71.5, 61.3, 55.5, 51.8, 48.3, 39.8, 37.0, 26.4, 26.2, 20.1, 18.8, 18.5, 14.4, -5.1; LRMS (ESI): Mass calculated for  $\text{C}_{50}\text{H}_{88}\text{O}_8\text{Si}_2\text{Na}$   $[\text{2M} + \text{Na}]^+$ , 896. Found  $[\text{2M} + \text{Na}]$ , 897;  $[\alpha]_{\text{D}}^{25} = -5.0$  ( $\text{CHCl}_3$ ,  $c = 1.0$ ).

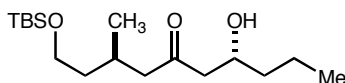

**(3R,7R)-1-(tert-butyldimethylsilyloxy)-7-hydroxy-3-methyldecan-5-one (49):** Ketone **20** (0.52 g, 1.2 mmol) was dissolved in CH<sub>2</sub>Cl<sub>2</sub> (110 mL), pH 7 phosphate buffer added (10 mL) and the mixture cooled to 0 °C. DDQ added (0.32 g, 1.4 mmol) and the mixture stirred for 3 h at 0 °C. The reaction was quenched by the addition of saturated aqueous NaHCO<sub>3</sub> (50 mL), and the aqueous phase was extracted with CH<sub>2</sub>Cl<sub>2</sub> (3 x 50 mL). The organic layers were combined, dried over anhydrous Na<sub>2</sub>SO<sub>4</sub>, filtered and concentrated. The residue was purified by flash column chromatography (3%-5% gradient EtOAc/hexanes) to afford ketone **49** (0.32 g, 84%) as a colorless oil. Analytical data for **49**: IR (film) 3463, 2957, 2860, 1701, 1465, 1254, 1096, 837, 776 cm<sup>-1</sup>; <sup>1</sup>H NMR (500 MHz, CDCl<sub>3</sub>) δ 4.02 (m, 1H), 3.62 (dddd, *J* = 10.5, 10.5, 10.5, 6.5 Hz, 2H), 3.07 (d, *J* = 3.5 Hz, 1H), 2.55 (dd, *J* = 17.5, 2.0 Hz, 1H), 2.50-2.43 (m, 2H), 2.24 (dd, *J* = 16.0, 8.5 Hz, 1H), 2.15 (dddd, *J* = 13.0, 13.0, 13.0, 6.0, 1H), 1.52-1.43 (m, 3H), 1.41-1.29 (m, 3H), 0.92-0.87 (m, 6H), 0.87 (s, 9H), 0.03 (s, 6H); <sup>13</sup>C NMR (125 MHz, CDCl<sub>3</sub>) δ 212.4, 67.4, 61.1, 51.3, 49.5, 39.7, 38.7, 26.3, 26.1, 20.1, 18.8, 18.4, 14.2, -5.1; LRMS (ESI): Mass calculated for C<sub>34</sub>H<sub>72</sub>O<sub>6</sub>Si<sub>2</sub>Na [2M + Na]<sup>+</sup>, 656. Found [2M + Na], 655; [α]<sub>D</sub><sup>25</sup> = +23.4 (CHCl<sub>3</sub>, c = 0.82).

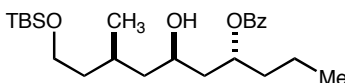

**(4R,6R,8R)-10-(tert-butyldimethylsilyloxy)-6-hydroxy-8-methyldecan-4-yl benzoate (21):** Ketone **49** (0.32g, 1.0 mmol) and benzaldehyde (0.53 g, 0.51 mL, 5.0 mmol) were dissolved in THF (4 mL) that was freshly distilled over benzophenone and sodium, then cooled to -10 °C (ice/salt water). A freshly prepared 0.1 M solution of SmI<sub>2</sub> (10.1 mL)<sup>6</sup> was added dropwise and the mixture stirred at -10 °C for 12 h. The reaction was quenched at low temperature by the addition of saturated aqueous NaHCO<sub>3</sub> (5 mL), and the aqueous layer was extracted with Et<sub>2</sub>O (3 x 20 mL). The organic layers were combined, dried over anhydrous Na<sub>2</sub>SO<sub>4</sub>, filtered and concentrated. The residue was purified by flash column chromatography (5%-7.5% gradient EtOAc/hexanes) to afford alcohol **21** (0.39 g, 91%) as a colorless oil. Analytical data for **21**: IR (film) 3519, 2957, 2930, 2858, 2362, 1700, 1459, 1277, 1097, 837 cm<sup>-1</sup>; <sup>1</sup>H NMR (500 MHz, CDCl<sub>3</sub>) δ 8.05 (d, *J* = 7.5 Hz, 2H), 7.57 (dd, *J* = 7.5, 7.5 Hz, 1H), 7.45 (d, *J* = 8.0 Hz, 2H), 5.36 (m, 1H), 3.66-3.55 (m, 3H), 3.26 (d, *J* = 3.5 Hz, 1H), 1.80-1.71 (m, 3H), 1.66-1.50 (m, 3H), 1.47-1.24 (m, 5H), 0.93 (t, *J* = 7.5 Hz, 3 H), 0.86 (d, *J* = 6.5 Hz, 3 H), 0.85 (s, 9H), -0.01 (s, 6H); <sup>13</sup>C NMR (125 MHz, CDCl<sub>3</sub>) δ 167.9, 133.4, 130.3, 128.7, 72.5, 65.4, 61.6, 44.7, 43.5, 39.7, 37.5, 26.6, 26.2, 20.7, 19.0, 18.5, 14.2, -5.0; LRMS (ESI): Mass calculated for C<sub>48</sub>H<sub>84</sub>O<sub>8</sub>Si<sub>2</sub>Na [2M + Na]<sup>+</sup>, 868. Found [2M + Na], 867; [α]<sub>D</sub><sup>25</sup> = +4.1 (CHCl<sub>3</sub>, c = 0.70).

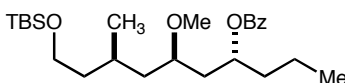

**(4R,6R,8R)-10-(tert-butyldimethylsilyloxy)-6-methoxy-8-methyldecan-4-yl benzoate (50):** Alcohol **21** (0.098 g, 0.23 mmol) was dissolved in CH<sub>2</sub>Cl<sub>2</sub> (1 mL) and 2,6-di-*tert*-butyl-4-

6. Girard, P.; Namy, J. L.; Kagan, H. B. *J. Am. Chem. Soc.* **1980**, *102*, 2693-2698.

methylpyridine (0.238 g, 1.16 mmol) was added. This solution was cooled to 0 °C and freshly prepared MeOTf (0.190 g, 0.13 mL, 1.16 mmol) added dropwise. The ice bath was then removed and the mixture stirred for 12 h at 23 °C (formation of a white precipitate observed). After 12 h, a second portion of MeOTf (0.190 g, 0.13 mL, 1.16 mmol) was added and the mixture was allowed to stir for an additional 8 h. The mixture was then concentrated *in vacuo* and the residue was purified by flash column chromatography (3%-5% gradient EtOAc/hexanes) to afford methylated alcohol **50** (0.088 g, 88%) as a colorless oil. Analytical data for **50**: IR (film) 2931, 2858, 2362, 1273, 1096, 836, 776  $\text{cm}^{-1}$ ;  $^1\text{H}$  NMR (500 MHz,  $\text{CDCl}_3$ )  $\delta$  8.04 (d,  $J = 7.5$  Hz, 2H), 7.55 (dd,  $J = 7.5, 7.5$  Hz, 1H), 7.44 (dd,  $J = 7.5, 7.5$  Hz, 2H), 5.38 (ddd,  $J = 12.0, 9.0, 3.0$  Hz, 1H), 3.63 (dddd,  $J = 17.0, 10.5, 10.5, 6.5$  Hz, 2H), 3.28 (m, 3H), 3.24 (m, 1H), 1.85 (m, 1H), 1.74-1.60 (m, 4H), 1.55 (ddd,  $J = 13.0, 7.0, 7.0$  Hz, 1H), 1.48-1.30 (m, 5H) 0.92 (t,  $J = 7.0$  Hz, 3H), 0.88 (s, 9H), 0.85 (d,  $J = 7.0$  Hz, 3H), 0.03 (s, 6H);  $^{13}\text{C}$  NMR (125 MHz,  $\text{CDCl}_3$ )  $\delta$  166.4, 132.9, 130.9, 129.7, 128.5, 76.3, 72.3, 61.2, 57.2, 41.6, 40.5, 39.9, 37.5, 26.3, 26.2, 20.0, 18.7, 18.5, 14.3, -5.0; LRMS (ESI): Mass calculated for  $\text{C}_{25}\text{H}_{44}\text{O}_4\text{Si}$   $[\text{M}]^+$ , 437. Found  $[\text{M}]$ , 437;  $[\alpha]_{\text{D}}^{25} = -14.5$  ( $\text{CHCl}_3$ ,  $c = 0.75$ ).

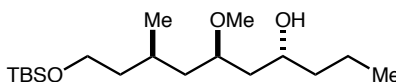

**(4R,6R,8R)-10-(tert-butyldimethylsilyloxy)-6-methoxy-8-methyldecan-4-ol (8)**: Methylated alcohol **50** (0.078 g, 0.180 mmol) was dissolved in MeOH (2 mL) and  $\text{K}_2\text{CO}_3$  (1.24 g, 8.98 mmol) added. This slurry was stirred at 23 °C for 20 h. The mixture was then concentrated *in vacuo* and the residue was diluted with water, and extracted with  $\text{Et}_2\text{O}$  (3 x 15 mL). The organic layers were combined, dried over anhydrous  $\text{Na}_2\text{SO}_4$ , filtered and concentrated. The residue was purified by flash column chromatography (5%-10% gradient EtOAc/hexanes) to afford alcohol **8** (0.052 g, 86%) as a colorless oil. Analytical data for **8**: IR (film) 3454, 2955, 2932, 1464, 1253, 1094, 836  $\text{cm}^{-1}$ ;  $^1\text{H}$  NMR (500 MHz,  $\text{CDCl}_3$ )  $\delta$  3.89 (m, 1H), 3.64 (ddd,  $J = 24.5, 10.0, 6.0$  Hz, 2H), 3.56 (ddd,  $J = 10.0, 10.0, 6.5$  Hz, 1H), 3.36 (s, 3H), 3.06 (d,  $J = 3.0$  Hz, 1H), 1.72 (m, 1H), 1.65-1.31 (m, 10H), 0.95 (d,  $J = 7.5$  Hz, 3H), 0.90 (t,  $J = 3.0$  Hz, 3H), 0.88 (s, 9H), 0.04 (s, 6H);  $^{13}\text{C}$  NMR (125 MHz,  $\text{CDCl}_3$ )  $\delta$  78.3, 68.7, 61.2, 56.9, 40.6, 40.5, 40.2, 39.0, 26.6, 26.2, 20.0, 19.1, 18.5, 14.4, -5.0; LRMS (ESI): Mass calculated for  $\text{C}_{36}\text{H}_{82}\text{O}_7\text{Si}$   $[\text{2M} + \text{H}_2\text{O}]^+$ , 683. Found  $[\text{2M} + \text{H}_2\text{O}]$ , 682;  $[\alpha]_{\text{D}}^{25} = -14.8$  ( $\text{CHCl}_3$ ,  $c = 0.62$ ).

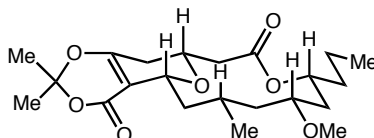

**Tricyclic Dioxinone (30)**: To a round bottom charged with aldehyde **5** (21.6 mg, 0.05 mmol),  $\text{CaSO}_4$  (20.6 mg, 1.52 mmol), and  $\text{Sc}(\text{OTf})_3$  (4.9 mg, 0.01 mmol) was added MeCN (5.0 mL). The reaction stirred for 45 min and then brine (0.5 mL) was added and the reaction mixture was filtered through a short pad of Celite eluting with  $\text{CH}_2\text{Cl}_2$ . The layers were separated and the aqueous layer was extracted with EtOAc (4 X 5 mL). The combined organic layers were dried with anhydrous  $\text{Na}_2\text{SO}_4$ , filtered and concentrated. The resulting residue was purified by flash column chromatography (30% EtOAc:hexanes) to afford tricyclic dioxinone **30** (5.0 mg, 25%) as a colorless oil. Analytical data for **30**:  $^1\text{H}$  NMR (500 MHz,  $\text{CDCl}_3$ )  $\delta$  5.21 (m, 1H), 4.44 (d,  $J = 10.0$ , 1H), 4.04 (m, 1H), 3.35 (s, 3H), 3.22 (m, 1H), 2.53 (dd,  $J = 12., 2.5$  Hz, 1H), 2.47 (dd,  $J =$

11.0, 11.0, 1H), 2.35-2.11 (m, 4H), 1.82 (d,  $J = 7.5$  Hz, 1H), 1.70 (s, 6H), 1.59-1.48 (m, 4H), 1.35 (ddd,  $J = 14.0, 9.5, 6.0$  Hz, 2H), 1.22-1.17 (m, 2H), 1.03 (d,  $J = 7.5$  Hz, 3H), 0.93 (dd,  $J = 7.5, 7.5$  Hz, 3H);  $^{13}\text{C}$  NMR (125 MHz,  $\text{CDCl}_3$ )  $\delta$  171.7, 162.2, 159.5, 106.0, 105.9, 82.5, 76.0, 75.1, 71.0, 56.9, 44.9, 42.5, 41.9, 40.5, 37.9, 33.6, 33.3, 27.7, 25.3, 22.1, 18.7, 14.1; LRMS (ESI): Mass calculated for  $\text{C}_{44}\text{H}_{68}\text{O}_{14}\text{Na}$   $[\text{2M}+\text{Na}]^+$ , 843. Found  $[\text{2M}+\text{Na}]^+$ , 843.

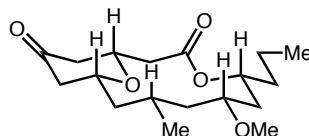

**(1R,5R,7R,9S,11R)-7-methoxy-9-methyl-5-propyl-4,15-dioxabicyclo[9.3.1]penta-decane-3,12-dione (51):** To a one-dram vial charged with tricyclic dioxinone **30** (4.1 mg, 0.01 mmol) was added DMSO (0.18 mL) and  $\text{H}_2\text{O}$  (0.5 mL). The reaction was then submerged into a preheated oil bath at 130 °C. The reaction stirred for 12 h and was then diluted with EtOAc (2 mL) and added to a separatory funnel containing brine (120 mL). The layers were separated and the aqueous layer was extracted with EtOAc (5 X 5 mL). The combined organic layers were dried with anhydrous  $\text{Na}_2\text{SO}_4$ , filtered and concentrated. The resulting residue was purified by flash column chromatography (30% EtOAc:hexanes) to afford pyranone **51** (3.2 mg, 99%) as a colorless oil. Analytical data for **51**: IR (film) 2918, 2872, 1724, 1651, 1558, 1369, 1100  $\text{cm}^{-1}$ ;  $^1\text{H}$  NMR (500 MHz,  $\text{CDCl}_3$ )  $\delta$  5.26 (dddd,  $J = 11.0, 5.5, 5.5, 5.5$ , 1H), 4.01 (dd,  $J = 11.0, 11.0$ , 1H), 3.71 (dd,  $J = 10.5, 10.5$ , 1H), 3.33 (s, 3H), 3.21 (dd,  $J = 8.5, 8.5$ , 1H), 2.55 (dd,  $J = 11.5, 11.5$ , 1H), 2.45 (d,  $J = 13.5$ , 2H), 2.36 (d,  $J = 14.0$ , 2H), 2.26 (ddd,  $J = 16.0, 16.0, 12.5$ , 2H), 1.84 (d,  $J = 15.0$ , 1H), 1.65-1.53 (m, 3H), 1.51-1.46 (m, 2H), 1.38-1.32 (m, 3H), 1.18 (ddd,  $J = 14.5, 9.5, 6.5$ , 1H), 1.03 (d,  $J = 6.0$ , 3H), 0.93 (dd,  $J = 8.0$ , 3H);  $^{13}\text{C}$  NMR (125 MHz,  $\text{CDCl}_3$ )  $\delta$  205.9, 171.9, 83.3, 79.5, 75.4, 75.0, 56.5, 48.6, 47.5, 44.8, 44.7, 42.7, 39.9, 38.0, 34.5, 24.6, 18.8, 14.1; LRMS (ESI): Mass calculated for  $\text{C}_{36}\text{H}_{60}\text{O}_{10}\text{Na}$   $[\text{2M}+\text{Na}]^+$ , 676. Found  $[\text{2M}+\text{Na}]^+$ , 676.  $[\alpha]_{\text{D}}^{25} = +20.6$  ( $\text{CHCl}_3$ ,  $c = 0.1$ ).

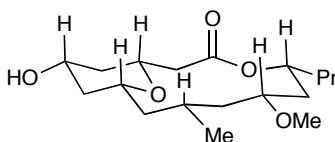

**(1R,5R,7R,9S,11R,13S)-13-hydroxy-7-methoxy-9-methyl-5-propyl-4,15-dioxabicyclo[9.3.1]pentadecan-3-one (3):** To a one-dram vial charged with pyranone **51** (4.2 mg, 0.013 mmol) was added MeOH (0.26 mL). The reaction mixture was cooled to 0 °C and  $\text{NaBH}_4$  (1.0 mg, 0.026 mmol) was added. After 10 min, AcOH (8.0  $\mu\text{L}$ ) was added and the reaction was concentrated in vacuo. The resulting residue was purified by flash column chromatography (50% EtOAc:hexanes) to afford alcohol **3** (2.9 mg, 96%) as a colorless oil. Analytical data for **3**:  $^1\text{H}$  NMR (500 MHz,  $\text{CDCl}_3$ )  $\delta$  5.25 (m, 1H), 3.84 (dddd,  $J = 5.8, 5.8, 5.8, 5.8$ , 1H), 3.74 (apt,  $J = 10.9$ , 1H), 3.43 (apt,  $J = 10.6$ , 1H), 3.43 (s, 3H), 3.21 (apt,  $J = 8.4$ , 1H), 2.43 (ddd,  $J = 14.7, 3.6, 3.6$ , 2H), 2.29 (d,  $J = 14.4$ , 1H), 2.02 (dd,  $J = 9.8, 2.0$ , 1H), 1.95 (dd,  $J = 4.2, 2.0$ , 1H), 1.82 (d,  $J = 14.8$ , 1H), 1.63-1.44 (m, 6H), 1.43-1.13 (m, 6H), 1.00 (d,  $J = 6.7$ , 3H), 0.93 (dd,  $J = 7.3$ , 3H);  $^{13}\text{C}$  NMR (125 MHz,  $\text{CDCl}_3$ )  $\delta$  172.8, 83.3, 78.3, 74.7, 74.2, 68.0, 56.5, 45.1, 44.5, 42.6, 41.9, 40.9, 40.0, 38.0, 34.5, 24.8, 18.8, 14.1.

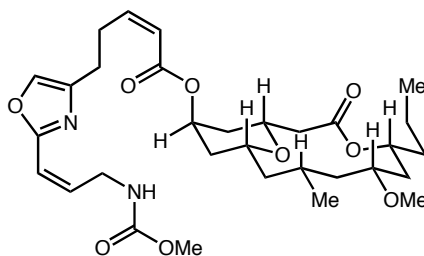

**Originally proposed structure (2):** To a one-dram vial charged with alcohol **3** (2.0 mg, 0.006 mmol), oxazole **4** (6.1 mg, 0.022 mmol) and PPh<sub>3</sub> (6.22 mg, 0.024 mmol) to which was added benzene (0.33 mL). To the reaction mixture was added diisopropyl azodicarboxylate (4.7  $\mu$ L, 0.024 mmol). After five min the reaction was concentrated *in vacuo*. The resulting residue was purified by flash column chromatography (30% EtOAc:hexanes) to afford **2** (2.6 mg, 73%) as a colorless oil. Analytical data for **2**: IR (film) 3361, 2922, 2871, 1718, 1649, 1520, 1459, 1248, 1159, 1106  $\text{cm}^{-1}$ ; <sup>1</sup>H NMR (600 MHz, CD<sub>3</sub>OD)  $\delta$  7.65 (s, 1H), 6.39 (ddd,  $J = 11.5, 7.4, 7.4$ , 1H), 6.33 (ddd,  $J = 11.8, 2.0, 2.0$ , 1H), 6.05 (ddd,  $J = 12.1, 6.1, 6.1$ , 1H), 5.89 (ddd, 11.5, 1.5, 1.5, 1H), 5.26-5.23 (m, 1H), 5.21 (dddd,  $J = 2.9, 2.9, 2.9, 2.9$ , 1H), 4.32 (d,  $J = 4.8$ , 2H), 4.03 (ddd,  $J = 13.2, 4.5, 2.1$ , 1H), 3.71 (dd,  $J = 11.4$ , 1H), 3.6 (s, 3H), 3.3 (s, 3H), 3.24 (dd,  $J = 8.1, 8.1$ , 1H), 3.02 (ddd,  $J = 7.5, 7.5$ , 2H), 2.73 (dd,  $J = 8.0, 8.0$ , 2H), 2.37 (dd,  $J = 12.3, 2.9$ , 1H), 2.33 (dd,  $J = 17.3, 6.5$ , 1H), 1.85-1.81 (m, 2H), 1.72 (apdd,  $J = 14.3, 2.7$ , 1H), 1.58-1.47 (m, 6H), 1.39-1.20 (m, 6H), 1.06 (ddd,  $J = 14.5, 10.1, 6.6$ , 1H), 0.96 (d,  $J = 6.9$ , 3H), 0.93 (dd,  $J = 7.3$ , 3H); <sup>13</sup>C NMR (125 MHz, CD<sub>3</sub>OD)  $\delta$  173.4, 165.6, 160.6, 158.4, 148.8, 141.0, 137.9, 134.7, 120.4, 114.7, 83.2, 75.2, 74.4, 71.5, 67.7, 55.3, 51.3, 44.8, 44.3, 41.9, 40.0, 39.7, 37.5, 35.8, 34.8, 34.3, 27.7, 25.1, 23.9, 18.4, 12.9; LRMS (ESI): Mass calculated for C<sub>31</sub>H<sub>47</sub>N<sub>2</sub>O<sub>9</sub> [M+H]<sup>+</sup>, 591. Found [M+H]<sup>+</sup>, 591.  $[\alpha]_{\text{D}}^{25} = +19.0$  (CH<sub>3</sub>OH),  $c = 0.03$ .

### Characterization Data for Diastereomer **34**

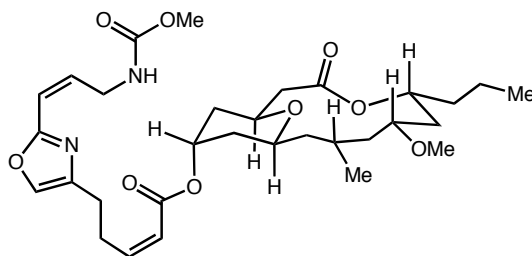

Analytic data for **34**: <sup>1</sup>H NMR (500 MHz, CD<sub>3</sub>OD)  $\delta$  6.34 (ddd,  $J = 11.7, 7.6, 7.6$ , 1H), 6.25 (apd,  $J = 11.7$ , 1H), 6.02 (ddd,  $J = 11.7, 5.8, 5.8$ , 1H), 5.86 (apd,  $J = 11.7$ , 1H), 5.21 (m, 1H), 5.11 (m, 1H), 4.28 (d,  $J = 5.2$ , 2H), 4.01 (m, 1H), 3.74 (apt,  $J = 10.5$ , 1H), 3.63 (s, 3H), 3.32 (s, 3H), 2.99 (ddd,  $J = 7.0, 7.0, 7.0$ , 2H), 2.69 (dd,  $J = 7.6$ , 2H), 2.65 (ddd,  $J = 4.1, 4.1, 4.1$ , 1H), 2.24 (ddd,  $J = 14.0, 8.7$ , 1H), 1.90-1.74 (m, 4H), 1.67-1.50 (m, 7H), 1.34-1.09 (m, 7H), 0.91 (d,  $J = 7.6$ , 3H), 0.88 (dd,  $J = 7.0$ , 3H); LRMS (ESI): Mass calculated for C<sub>31</sub>H<sub>47</sub>N<sub>2</sub>O<sub>9</sub> [M+1]<sup>+</sup>, 591. Found [M+H]<sup>+</sup>, 591.

## Experimental Procedures and Characterization Data for Synthesis of Revised Structure

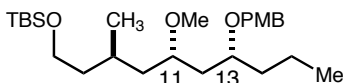

***tert*-Butyl((3*R*,5*S*,7*R*)-5-methoxy-7-(4-methoxybenzyloxy)-3-methyldecyloxy) dimethylsilane (**39**):** Iodide **19** (0.126 g, 0.385 mmol) was azeotroped with benzene 3 times then dissolved in pentane (freshly distilled from CaH<sub>2</sub>, 3 mL) and ether (2 mL) and cooled to  $-78$  °C. A solution of *t*-butyllithium (2.7 M in heptane, 0.30 mL) was added dropwise and the mixture was stirred at  $-78$  °C for 15 min, then warmed to 0 °C for 20 min (after which a white precipitate was noticed). The solution was cooled back down to  $-78$  °C and a solution of (*R*)-3-(4-methoxybenzyloxy)hexanal (derived from the DIBAL reduction of amide **18**) (0.091 g, 0.39 mmol) in THF was cooled to  $-78$  °C and added via cannula (dripped along the side of the cooled reaction flask). This mixture was stirred for 15 min at  $-78$  °C. The reaction was quenched at low temperature with the addition of saturated aqueous NH<sub>4</sub>Cl (50 mL). Upon warming to ambient temperature, the mixture was extracted with EtOAc (3 x 50 mL), the organic layers combined, dried over anhydrous Na<sub>2</sub>SO<sub>4</sub>, filtered and concentrated. This mixture of C11/C13 *syn*- and *anti*-addition products proved difficult to separate and was carried forward without exhaustive separation.

The alcohol (1:1 mixture of diastereomers, 0.300 g, 0.685 mmol) was dissolved in CH<sub>2</sub>Cl<sub>2</sub> (2 mL) and 2,6-di-*tert*-butyl-4-methylpyridine (0.703 g, 3.42 mmol) was added. This solution was cooled to 0 °C and freshly prepared MeOTf (0.37 mL, 3.42 mmol) added dropwise. The ice bath was then removed and the mixture stirred for 12 h at 23 °C (formation of a white precipitate observed). After 12 h, a second portion of MeOTf (0.37 mL, 3.42 mmol) was added and the mixture was allowed to stir for an additional 8 h. The mixture was then concentrated *in vacuo* and the residue was purified by flash column chromatography (5% EtOAc/hexanes) to afford methyl ether **39** (0.093 g, 30%) as a colorless oil. Analytical data for **39**: IR (film) 2931, 2859, 2362, 1614, 1514, 1465, 1249, 1095, 835, 776 cm<sup>-1</sup>; <sup>1</sup>H NMR (500 MHz, CDCl<sub>3</sub>) δ 7.26 (d, *J* = 8.5 Hz, 2H), 6.86 (d, *J* = 8.5 Hz, 2H), 4.45 (A of ABq, *J*<sub>AB</sub> = 11.0 Hz, 1H), 4.39 (B of ABq, *J*<sub>AB</sub> = 11.5 Hz, 1H), 3.80 (s, 3H), 3.63 (ddd, *J* = 18.5, 18.5, 6.0 Hz, 2H), 3.45 (dddd, *J* = 11.0, 5.0, 5.0, 5.0 Hz, 1H), 3.37 (m, 1H), 3.29 (s, 3H), 1.90 (ddd, *J* = 13.5, 6.0, 6.0 Hz, 1H), 1.74 (m, 1H), 1.57-1.46 (m, 5H), 1.45-1.25 (m, 3H) 1.19 (ddd, *J* = 13.0, 8.5, 4.0 Hz, 1H), 0.92 (d, *J* = 7.5 Hz, 3H), 0.90-0.87 (m, 3H), 0.89 (s, 9H), 0.04 (s, 6H); <sup>13</sup>C NMR (125 MHz, CDCl<sub>3</sub>) δ 159.3, 131.2, 129.6, 113.9, 76.3, 75.8, 70.5, 61.6, 56.3, 55.5, 42.3, 40.8, 39.0, 36.6, 26.4, 26.2, 19.9, 18.7, 18.5, 14.5,  $-5.0$ ; LRMS (ESI): Mass calculated for C<sub>26</sub>H<sub>48</sub>O<sub>4</sub>SiNa [M+Na]<sup>+</sup>, 476. Found [M+Na], 476; [α]<sub>D</sub><sup>25</sup> =  $-16.3$  (CHCl<sub>3</sub>, *c* = 0.49).

Stereochemical proof of C11/C13 cis relationship of **39**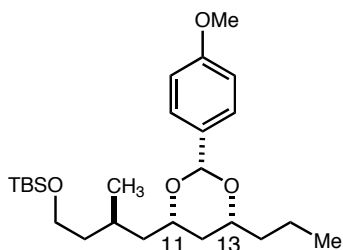**tert-butyl((R)-4-((2R,4S,6R)-2-(4-methoxyphenyl)-6-propyl-1,3-dioxan-4-yl)-3-methylbutoxy)dimethylsilane (**52**):**

The cis alcohol from the addition above was separated after multiple purifications by column chromatography. A pure sample of this material (0.0150 g, 0.0355 mmol) was dissolved in CH<sub>2</sub>Cl<sub>2</sub> (0.5 mL), activated 4Å molecular sieves (0.0249 g) and the mixture cooled to 0 °C. DDQ (0.0121 g, 0.533 mmol) added and the mixture stirred for 2 h while warming to 23 °C. The reaction was quenched by the addition of saturated aqueous NaHCO<sub>3</sub> (3 mL), and the aqueous phase was extracted with CH<sub>2</sub>Cl<sub>2</sub> (3 x 5 mL). The organic layers were combined, dried over anhydrous Na<sub>2</sub>SO<sub>4</sub>, filtered and concentrated. The residue was purified by flash column chromatography (5% acetone/hexanes) to afford acetal **52** (0.011 g, 75%) as a colorless oil. Analytical data for **52**: IR (film) 2928, 2856, 2362, 2336, 1650, 1514, 1464, 1249, 1094, 1035 cm<sup>-1</sup>; <sup>1</sup>H NMR (500 MHz, CDCl<sub>3</sub>) δ 7.42 (d, *J* = 8.5 Hz, 2H), 6.87 (d, *J* = 9.0 Hz, 2H), 5.46 (s, 1H), 3.88 (m, 1H), 3.79 (m, 4H), 3.65 (dddd, *J* = 13.0, 9.5, 9.5, 6.0, 2H), 1.73-1.57 (m, 6H), 1.53-1.34 (m, 4H), 1.29-1.24 (m, 2H), 0.95-0.92 (m, 5H), 0.87 (s, 9H), 0.04 (s, 6H); <sup>13</sup>C NMR (125 MHz, CDCl<sub>3</sub>) δ 159.8, 132.0, 127.5, 113.6, 100.5, 76.8, 74.8, 61.5, 55.5, 43.7, 40.5, 38.4, 37.7, 26.2, 25.7, 19.8, 18.6, 18.6, 14.3, -5.1; LRMS (ESI): Mass calculated for C<sub>25</sub>H<sub>44</sub>O<sub>4</sub>Si [M]<sup>+</sup>, 437. Found [M]<sup>+</sup>, 437; [α]<sub>D</sub><sup>25</sup> = -5.0 (CHCl<sub>3</sub>, c = 0.14).

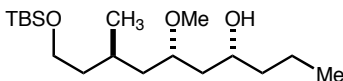

**(4R,6S,8R)-10-(tert-butyltrimethylsilyloxy)-6-methoxy-8-methyldecan-4-ol (**53**):** PMB ether **39** (0.0967 g, 0.214 mmol) was dissolved in CH<sub>2</sub>Cl<sub>2</sub> (20 mL), pH 7 phosphate buffer added (2 mL) and the mixture cooled to 0 °C. DDQ was added (0.0582 g, 0.26 mmol) and the mixture stirred for 3 h at 0 °C. The reaction was quenched by the addition of saturated aqueous NaHCO<sub>3</sub> (20 mL), and the aqueous phase was extracted with CH<sub>2</sub>Cl<sub>2</sub> (3 x 30 mL). The organic layers were combined, dried over anhydrous Na<sub>2</sub>SO<sub>4</sub>, filtered and concentrated. The residue was purified by flash column chromatography (6%-8% gradient EtOAc/hexanes) to afford alcohol **53** (0.059 g, 83%) as a colorless oil. Analytical data for **53**: IR (film) 3447, 2956, 2932, 2864, 2362, 2336, 1465, 1380, 1253, 1095, 836 cm<sup>-1</sup>; <sup>1</sup>H NMR (500 MHz, CDCl<sub>3</sub>) δ 3.77 (m, 1H), 3.68-3.60 (m, 2H), 3.57 (s, 1H), 3.51 (m, 1H), 3.35 (s, 3H), 1.69 (m, 1H), 1.63-1.52 (m, 4H), 1.49-1.42 (m, 2H), 1.39-1.28 (m, 3H), 1.25 (ddd, *J* = 21.0, 14.0, 7.0 Hz, 1H), 0.93-0.92 (m, 6H), 0.88 (s, 9H), 0.04 (s, 6H); <sup>13</sup>C NMR (125 MHz, CDCl<sub>3</sub>) δ 80.4, 71.8, 61.2, 56.2, 41.6, 41.4, 40.2, 40.1, 26.3, 26.2, 20.5, 18.9, 18.5, 14.4, -5.2; LRMS (ESI): Mass calculated for C<sub>18</sub>H<sub>40</sub>O<sub>3</sub>Si [M]<sup>+</sup>, 333. Found [M]<sup>+</sup>, 333; [α]<sub>D</sub><sup>25</sup> = +16.3 (CHCl<sub>3</sub>, c = 0.27).

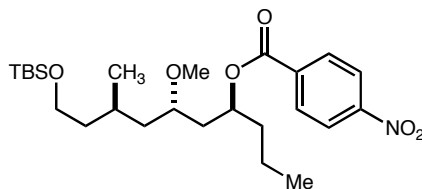

**(4S,6S,8R)-10-(tert-butyldimethylsilyloxy)-6-methoxy-8-methyldecan-4-yl-4-nitrobenzoate (54):** To a round bottom charged with alcohol **53** (59 mg, 0.118 mmol) was added benzene (2.0 mL) followed by addition of PPh<sub>3</sub> (24 mg, 0.90 mmol), 4-nitrobenzoic acid (135 mg, 0.81 mmol) and diethyl azodicarboxylate (141  $\mu$ L, 0.90 mmol). The reaction stirred for 3 h and was diluted with EtOAc (10 mL). The mixture was then washed with water (10 mL) and then brine (10 mL). The combined aqueous layers were extracted with EtOAc (2 X 10 mL). The combined organic layers were dried with anhydrous Na<sub>2</sub>SO<sub>4</sub>, filtered and concentrated. The resulting residue was purified by flash column chromatography (5% EtOAc:hexanes) to afford ester **54** (63 mg, 73%) of a colorless oil. Analytical data for **54**: IR (film) 2930, 2858, 1724, 1530, 1274, 1097, 836, 717 cm<sup>-1</sup>; <sup>1</sup>H NMR (500 MHz, CDCl<sub>3</sub>)  $\delta$  8.30 (d, *J* = 9.0, 2H), 8.23 (d, *J* = 9.0, 2H), 5.41 (dddd, *J* = 8.5, 8.5, 8.5, 8.5, 1H), 3.63 (ddd, *J* = 13.0, 13.0, 10.5, 2H), 3.34-3.32 (m, 1H), 3.29 (s, 3H), 1.87 (ddd, *J* = 14.5, 9.0, 3.5, 1H), 1.81-1.60 (m, 5H), 1.56 (ddd, *J* = 13.0, 13.0, 7.0, 1H), 1.46-1.37 (m, 2H), 1.28 (ddd, *J* = 20.5, 14.0, 7.0, 1H), 1.22 (ddd, *J* = 13.5, 6.0, 6.0, 1H), 0.95 (dd, *J* = 7.5, 7.5, 3H), 0.91 (d, *J* = 6.0, 3H), 0.88 (s, 9H), 0.04 (s, 6H); <sup>13</sup>C NMR (125 MHz, CDCl<sub>3</sub>)  $\delta$  164.5, 150.6, 136.3, 130.8, 123.7, 84.3, 75.9, 74.1, 73.7, 61.2, 57.0, 42.1, 40.2, 39.7, 37.4, 26.4, 26.1, 20.2, 18.7, 18.5, 14.2, -5.0; LRMS (ESI): Mass calculated for C<sub>25</sub>H<sub>43</sub>NO<sub>5</sub>Si [M]<sup>+</sup>, 482. Found [M]<sup>+</sup>, 482. [ $\alpha$ ]<sub>D</sub><sup>25</sup> = +19.1 (CHCl<sub>3</sub>, c = 0.83).

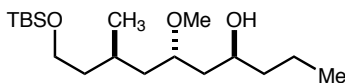

**(4S,6S,8R)-10-(tert-butyldimethylsilyloxy)-6-methoxy-8-methyldecan-4-ol (36):** To a round bottom flask charged with ester **54** (63 mg, 0.13 mmol) was added MeOH (2 mL) followed by K<sub>2</sub>CO<sub>3</sub> (898 mg, 6.5 mmol). The reaction mixture stirred for 3 h and was then concentrated *in vacuo*. The resulting residue was purified by flash column chromatography (10% EtOAc:hexanes) to afford alcohol **36** (30 mg, 70%) as a colorless oil. Analytical data for **36**: IR (film) 3446, 2931, 2860, 1650, 1461, 1253, 1094, 836 cm<sup>-1</sup>; <sup>1</sup>H NMR (500 MHz, CDCl<sub>3</sub>)  $\delta$  3.91 (m, 1H), 3.66 (m, 2H), 3.60 (dddd, *J* = 6.0, 6.0, 6.0, 6.0, 1H), 1.77-1.69 (m, 3H), 1.63-1.44 (m, 6H), 1.40-1.31 (m, 4H), 1.24 (ddd, *J* = 15.5, 9.0, 5.0, 2H), 0.96-0.93 (m, 6H), 0.90 (s, 9H), 0.06 (s, 6H); <sup>13</sup>C NMR (125 MHz, CDCl<sub>3</sub>)  $\delta$  78.0, 68.7, 61.3, 56.9, 47.6, 41.2, 40.2, 39.4, 26.6, 26.2, 20.2, 19.1, 18.5, 14.4, -5.1; LRMS (ESI): Mass calculated for C<sub>18</sub>H<sub>40</sub>O<sub>3</sub>Si [M]<sup>+</sup>, 333. Found [M]<sup>+</sup>, 333. [ $\alpha$ ]<sub>D</sub><sup>25</sup> = +10.9 (CHCl<sub>3</sub>, c = 0.3).

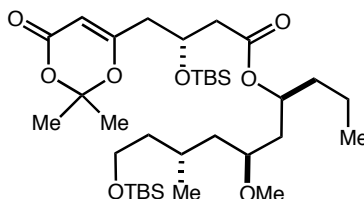

**(R)-((4S,6S,8R)-10-(tert-butyldimethylsilyloxy)-6-methoxy-8-methyldecan-4-yl)-3-(tert-butyldimethylsilyloxy)-4-(2,2-dimethyl-4-oxo-4H-1,3-dioxin-6-yl)butanoate (55):** To a



solution of carboxylic acid **7** (53.9 mg, 0.156 mmol) in THF (2.8 mL) was added Et<sub>3</sub>N (23  $\mu$ L, 0.166 mmol) followed by 2,4,6-trichlorobenzoyl chloride (25  $\mu$ L, 0.156 mmol). The reaction mixture was allowed to stir for 1 h and a mixture of alcohol **36** (52 mg, 0.156 mmol), DMAP (21 mg, 0.166 mmol) in THF (0.8 mL) was added via cannula. The reaction was allowed to stir for 18 h and was then quenched by the addition of saturated aqueous NH<sub>4</sub>Cl. The aqueous layer was separated and extracted with EtOAc (4 X 2 mL). The combined organic layers were dried with anhydrous Na<sub>2</sub>SO<sub>4</sub>, filtered and concentrated. The resulting residue was purified by flash column chromatography to afford **55** (81.5 mg, 82%) as a clear oil. Analytical data for **55**: IR (film) cm<sup>-1</sup>; <sup>1</sup>H NMR (500 MHz, CDCl<sub>3</sub>)  $\delta$  5.30 (s, 1H), 5.10 (dddd,  $J = 12.5, 6.0, 6.0, 6.0$ , 1H), 4.41 (dddd,  $J = 12.0, 6.0, 6.0, 6.0$ , 1H), 3.65 (ddd,  $J = 17.5, 17.5, 10.0$ , 2H), 3.29 (s, 3H), 3.25 (m, 1H), 2.58-2.45 (m, 3H), 2.44 (ddd,  $J = 12.0, 12.0, 5.0$ , 1H), 1.75-1.66 (m, 2H), 1.71 (s, 3H), 1.69 (s, 3H), 1.61-1.48 (m, 4H), 1.41-1.22 (m, 4H), 1.18 (ddd,  $J = 13.5, 7.5, 5.5$ , 1H), 0.94-0.91 (m, 6H), 0.90 (s, 9H), 0.87 (s, 9H), 0.09 (s, 6H), 0.06 (s, 6H); <sup>13</sup>C NMR (125 MHz, CDCl<sub>3</sub>)  $\delta$  170.6, 168.7, 161.5, 106.7, 96.0, 75.9, 72.0, 66.4, 61.3, 56.9, 42.6, 42.2, 41.9, 40.5, 39.5, 37.2, 26.4, 26.2, 26.0, 25.9, 24.6, 20.1, 18.6, 18.5, 18.1, 14.2, -4.5, -4.9; LRMS (ESI): Mass calculated for C<sub>34</sub>H<sub>67</sub>O<sub>8</sub>Si<sub>2</sub> [M+H]<sup>+</sup>, 660. Found [M+H]<sup>+</sup> 660 [ $\alpha$ ]<sub>D</sub><sup>25</sup> = +5.3 (CHCl<sub>3</sub>, c = 0.5).

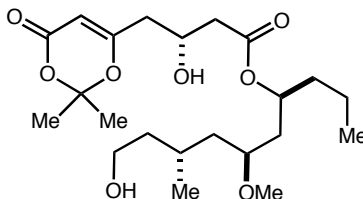

**(R)-((4S,6S,8R)-10-hydroxy-6-methoxy-8-methyldecan-4-yl)-4-(2,2-dimethyl-4-oxo-4H-1,3-dioxin-6-yl)-3-hydroxybutanoate (**56**):** To a 0 °C solution of silyl ether **55** (81.5 mg, 0.124 mmol) in THF (2.5 mL) was added HF•pyridine (0.22 mL, 2.48 mmol). The reaction mixture was allowed to warm to room temperature and was stirred for 2 h. At this time, the reaction was then cooled to 0 °C and diluted with EtOAc (2 mL) and quenched with saturated aqueous NaHCO<sub>3</sub> (10 mL). The aqueous layer was separated and extracted with EtOAc (5 X 5 mL). The combined organic layers were dried with anhydrous Na<sub>2</sub>SO<sub>4</sub>, filtered and concentrated. The resulting residue was purified by flash column chromatography to afford **56** (49.7 mg, 93%) as a clear oil. Analytical data for **56**: IR (film) 3421, 2927, 1726, 1386, 1273, 1201, 1012 cm<sup>-1</sup>; <sup>1</sup>H NMR (500 MHz, CDCl<sub>3</sub>)  $\delta$  5.37 (s, 1H), 5.20 (m, 1H), 4.33 (m, 1H), 4.032 (bs, 1H), 3.37-3.31 (m, 1H), 3.33 (s, 3H), 2.57 (dd,  $J = 16.0, 3.0$ , 1H), 2.47 (ddd,  $J = 20.5, 9.0, 9.0$ , 2H), 2.38 (dd,  $J = 14.5, 4.5$ , 1H), 2.053 (bs, 1H), 1.85 (ddd,  $J = 13.5, 10.0, 2.5$ , 1H), 1.75-1.49 (m, 5H), 1.71 (s, 6H), 1.43 (ddd,  $J = 13.5, 6.5, 6.5$ , 2H), 1.35-1.26 (m, 2H), 1.14 (ddd,  $J = 13.0, 5.5, 5.5$ , 1H), 0.96-0.91 (m, 6H); <sup>13</sup>C NMR (125 MHz, CDCl<sub>3</sub>)  $\delta$  171.2, 168.6, 161.3, 106.9, 95.5, 76.4, 72.0, 65.1, 60.5, 56.9, 42.2, 40.8, 39.8, 38.3, 37.4, 26.0, 25.4, 25.0, 20.5, 18.7, 14.1; LRMS (ESI): Mass calculated for C<sub>22</sub>H<sub>39</sub>O<sub>8</sub>Si [M+H]<sup>+</sup>, 431. Found [M+H]<sup>+</sup> 431. [ $\alpha$ ]<sub>D</sub><sup>25</sup> = +2.8 (CHCl<sub>3</sub>, c = 1.0).

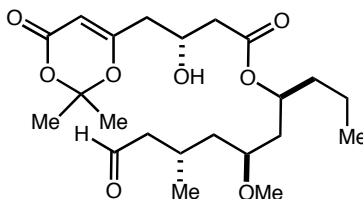

**(R)-((4S,6S,8S)-6-methoxy-8-methyl-10-oxodecan-4-yl)-4-(2,2-dimethyl-4-oxo-4H-1,3-dioxin-6-yl)-3-hydroxybutanoate (40):** To a solution of diol **56** (49.7 mg, 0.116 mmol) in CH<sub>2</sub>Cl<sub>2</sub> (1.9 mL) was added TEMPO (1.8 mg, 0.012 mmol) and bisacetoxy iodobenzene (41.0 mg, 0.13 mmol). The reaction mixture stirred for 4 h and was then diluted with CH<sub>2</sub>Cl<sub>2</sub> (5 mL) and quenched with saturated Na<sub>2</sub>S<sub>2</sub>O<sub>3</sub> (20 mL). The aqueous layer was separated and extracted with CH<sub>2</sub>Cl<sub>2</sub> (5 X 5 mL). The combined organic layers were dried with anhydrous Na<sub>2</sub>SO<sub>4</sub>, filtered and concentrated to afford aldehyde **40** (49.2 mg, 99%) as a colorless oil. Aldehyde **40** was used directly in the next step. Analytical data for: <sup>1</sup>H NMR (500 MHz, CDCl<sub>3</sub>) δ 9.76 (s, 1H), 5.37 (s, 1H), 5.16 (m, 1H), 4.33 (m, 1H), 3.58 (m, 1H), 3.38-3.26 (m, 1H), 3.32 (s, 3H), 2.57 (dd, *J* = 16.0, 3.0, 1H), 2.51-2.37 (m, 2H), 2.32 (dd, *J* = 7.5, 2.0, 1H), 2.29 (dd, *J* = 9.5, 4.5, 1H), 2.22 (ddd, *J* = 13.5, 13.5, 7.0, 1H), 1.82-1.74 (m, 1H), 1.72 (s, 3H), 1.71 (s, 3H), 1.67-1.65 (m, 2H), 1.64-1.56 (m, 1H), 1.55-1.48 (m, 2H), 1.38-1.23 (m, 3H), 1.02 (d, *J* = 6.5, 3H), 0.93 (dd, *J* = 7.5, 7.5, 3H); <sup>13</sup>C NMR (125 MHz, CDCl<sub>3</sub>) δ 202.7, 171.6, 168.5, 161.2, 106.9, 95.7, 76.2, 72.1, 65.1, 56.8, 51.6, 41.8, 41.2, 40.7, 38.4, 37.3, 29.9, 25.6, 24.9, 20.7, 18.8, 14.1; LRMS (ESI): Mass calculated for C<sub>22</sub>H<sub>36</sub>O<sub>8</sub>Na [M+Na]<sup>+</sup>, 451. Found [M+Na]<sup>+</sup>, 451.

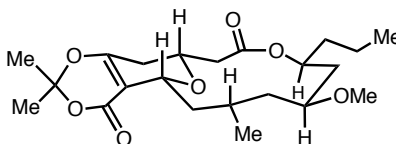

**Tricyclic Dioxinone (41):** To round bottom charged with aldehyde **40** (21.6 mg, 0.05 mmol), CaSO<sub>4</sub> (20.6 mg, 1.52 mmol), and Sc(OTf)<sub>3</sub> (4.9 mg, 0.01 mmol) was added MeCN (5.0 mL). The reaction stirred for 45 min and then brine (0.5 mL) was added and the reaction mixture was filtered through a short pad of Celite eluting with CH<sub>2</sub>Cl<sub>2</sub>. The layers were separated and the aqueous layer was extracted with EtOAc (4 X 5 mL). The combined organic layers were dried with anhydrous Na<sub>2</sub>SO<sub>4</sub>, filtered and concentrated. The resulting residue was purified by flash column chromatography (30% EtOAc:hexanes) to afford tricyclic dioxinone **41** (5.0 mg, 25%) as a colorless oil. Analytical data for **41**: IR (film) 2922, 1726, 1648, 1406, 1269, 1207, 1090, 999 cm<sup>-1</sup>; <sup>1</sup>H NMR (500 MHz, CDCl<sub>3</sub>) δ 5.25 (dddd, *J* = 9.0, 4.0, 4.0, 4.0, 1H), 4.44-4.42 (d, *J* = 11.0, 1H), 3.96 (dddd, *J* = 12.5, 9.0, 5.0, 2.0, 1H), 3.34 (m, 1H), 3.30 (s, 3H), 2.91-2.84 (m, 2H), 2.35 (dd, *J* = 12.5, 2.5, 1H), 2.15 (d, *J* = 18.5, 1H), 2.00 (m, 1H), 1.75-1.71 (m, 1H), 1.70 (s, 3H), 1.69 (s, 3H), 1.63-1.49 (m, 4H), 1.44 (m, 1H), 1.40-1.32 (m, 2H), 1.28-1.23 (m, 2H), 1.06 (d, *J* = 7.5, 3H), 0.93 (dd, *J* = 7.5, 7.5, 3H); <sup>13</sup>C NMR (125 MHz, CDCl<sub>3</sub>) δ 170.6, 163.2, 159.6, 106.3, 105.1, 76.9, 73.6, 72.3, 68.4, 56.2, 43.5, 42.3, 42.1, 39.8, 37.6, 32.1, 27.7, 27.2, 23.7, 22.5, 18.9, 14.1; LRMS (ESI): Mass calculated for C<sub>44</sub>H<sub>68</sub>O<sub>14</sub>Na [2M+Na]<sup>+</sup>, 843. Found [2M+Na]<sup>+</sup>, 843. [α]<sub>D</sub><sup>25</sup> = +198.6 (CHCl<sub>3</sub>, c = 0.9).

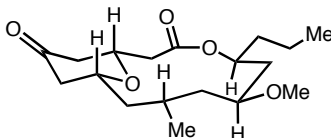

**(1R,5S,7S,9S,11R)-7-methoxy-9-methyl-5-propyl-4,15-dioxabicyclo[9.3.1]penta decane-3,13-dione (42):** To a one-dram vial charged with tricyclic dioxinone **41** (5.0 mg, 0.01 mmol) was added DMSO (0.25 mL) and H<sub>2</sub>O (0.6 mL). The reaction was then submerged into a preheated oil bath of 130 °C. The reaction stirred for 12 h and was then diluted with EtOAc (2 mL) and

added to a separatory funnel containing brine (125 mL). The layers were separated and the aqueous layer was extracted with EtOAc (5 X 5 mL). The combined organic layers were dried with anhydrous Na<sub>2</sub>SO<sub>4</sub>, filtered and concentrated. The resulting residue was purified by flash column chromatography (30% EtOAc:hexanes) to afford pyranone **42** (3.0 mg, 82%) as a colorless oil. Analytical data for **42**: IR (film) 2958, 2920, 1725, 1651, 1558, 1273, 1249, 1091 cm<sup>-1</sup>; <sup>1</sup>H NMR (500 MHz, CDCl<sub>3</sub>) δ 5.25-5.20 (m, 1H), 4.05 (apt, *J* = 10.2, 1H), 3.59 (apt, *J* = 9.72, 1H), 3.51 (apt, *J* = 9.7, 1H), 3.344 (s, 3H), 2.72 (dd, *J* = 15.1, 4.34, 1H), 2.53 (dd, *J* = 14.6, 10.7, 1H), 2.44 (d, *J* = 14.1, 1H), 2.35-2.22 (m, 2H), 1.86 (apt, *J* = 12.2, 1H), 1.73-1.60 (m, 3H), 1.55-1.45 (m, 2H), 1.43-1.35 (m, 4H), 1.20 (apt, *J* = 12.1, 2H), 1.01 (d, *J* = 6.8, 3H), 0.93 (dd, *J* = 7.3, 3H); <sup>13</sup>C NMR (125 MHz, CDCl<sub>3</sub>) δ 206.1, 170.2, 79.2, 77.5, 75.9, 73.5, 56.5, 49.0, 47.2, 44.4, 42.7, 40.2, 37.1, 31.3, 25.7, 19.1, 14.1; LRMS (ESI): Mass calculated for C<sub>36</sub>H<sub>62</sub>O<sub>11</sub> [2M+H<sub>2</sub>O]<sup>+</sup>, 670. Found [2M+H<sub>2</sub>O]<sup>+</sup>, 670. [α]<sub>D</sub><sup>25</sup> = +32.6 (CHCl<sub>3</sub>, c = 0.1).

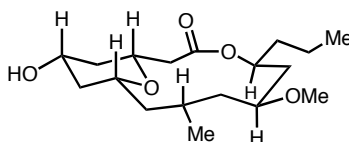

**Alcohol (43):** To a one-dram vial charged with pyranone **42** (3.0 mg, 0.01 mmol) was added MeOH (0.2 mL). The reaction mixture was cooled to 0 °C and NaBH<sub>4</sub> (0.5 mg, 0.02 mmol) was added. After 10 min, AcOH (7.0 μL) was added and the reaction was concentrated in vacuo. The resulting residue was purified by flash column chromatography (50% EtOAc:hexanes) to afford pyran **43** (2.9 mg, 96%) as a colorless oil. Analytical data for **43**: IR (film) 3416, 2918, 2871, 1730, 1650, 1459, 1087 cm<sup>-1</sup>; <sup>1</sup>H NMR (500 MHz, CDCl<sub>3</sub>) δ 5.18-5.16 (m, 1H), 3.81-3.77 (m, 1H), 3.75 (apt, *J* = 11.2, 1H), 3.68 (apt, *J* = 10.2, 1H), 3.32 (s, 3H), 3.18 (apt, *J* = 10.2, 1H), 2.63 (dd, *J* = 14.6, 3.9, 1H), 2.43 (dd, *J* = 14.1, 11.2, 1H), 1.98 (apt, *J* = 12.2, 1H), 1.86 (apt, *J* = 11.2, 2H), 1.70 (dddd, *J* = 5.8, 5.8, 5.8, 5.8, 1H), 1.59 (apt, *J* = 12.7, 2H), 1.51-1.50 (m, 3H), 1.50-1.42 (m, 1H), 1.37-1.33 (m, 4H), 1.30-1.12 (m, 2H), 0.99 (d, *J* = 6.35, 3H), 0.92 (t, *J* = 7.32, 3H); <sup>13</sup>C NMR (125 MHz, CDCl<sub>3</sub>) δ 171.0, 78.8, 75.7, 73.4, 72.5, 68.3, 56.5, 44.3, 42.5, 42.4, 42.1, 40.9, 40.2, 37.1, 31.4, 25.8, 19.2, 14.1; LRMS (ESI): Mass calculated for C<sub>36</sub>H<sub>64</sub>O<sub>10</sub>Na [2M+Na]<sup>+</sup>, 328.44. Found [2M+Na]<sup>+</sup>, 679.9. [α]<sub>D</sub><sup>25</sup> = +18.1 (CHCl<sub>3</sub>, c = 0.1).

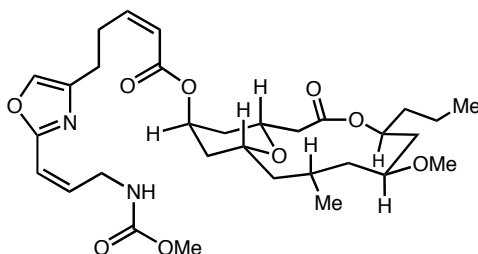

**Neopeltolide (1):** To a one-dram vial charged with pyran **43** (2.9 mg, 0.009 mmol), oxazole **4** (8.6 mg, 0.032 mmol) and PPh<sub>3</sub> (6.84 mg, 0.027 mmol) was added benzene (0.36 mL). To the reaction mixture was added diisopropyl azodicarboxylate (5.2 μL, 0.027 mmol). After five min the reaction was concentrated *in vacuo*. The resulting residue was purified by flash column chromatography (30% EtOAc:hexanes) to afford **1** (4.2 mg, 79%) as a colorless oil. Analytical data for **1**: IR (film) 3356, 3132, 2921, 2497, 1718, 1645, 1458, 1394, 1273, 1167, 1084, 1026,

777  $\text{cm}^{-1}$ ;  $^1\text{H}$  NMR (600 MHz,  $\text{CD}_3\text{OD}$ )  $\delta$  7.67 (s, 1H), 6.40 (ddd,  $J = 11.5, 7.4, 7.4$ , 1H), 6.29 (ddd,  $J = 11.9, 4.2, 2.1$ , 1H), 6.05 (ddd,  $J = 11.9, 6.0, 6.0$ , 1H), 5.90 (ddd,  $J = 13.1, 3.3, 1.6$ , 1H), 5.22–5.21 (m, 1H), 5.19–5.16 (m, 1H), 4.32 (d,  $J = 4.94$ , 2H), 4.09 (dddd,  $J = 11.3, 11.3, 4.2, 2.1$ , 1H), 3.68 (dd,  $J = 9.5, 9.5$ , 1H), 3.66 (s, 3H), 3.56 (t,  $J = 9.88$ , 1H), 3.29 (s, 3H), 3.03 (ddd,  $J = 7.5, 7.5, 7.5$ , 2H), 2.74 (dd,  $J = 7.3, 7.3$ , 2H), 2.72 (dd,  $J = 10.8, 3.7$ , 1H), 2.32 (dd,  $J = 14.7, 10.8$ , 1H), 1.89 (ddd,  $J = 14.2, 10.8$ , 1H), 1.85–1.83 (m, 1H), 1.75–1.71 (m, 1H), 1.71–1.68 (m, 1H), 1.61–1.50 (m, 4H), 1.44–1.29 (m, 7H), 1.12 (ddd,  $J = 12.9, 10.9, 1.9$ , 1H), 1.00 (d,  $J = 6.7, 3\text{H}$ ), 0.96 (dd,  $J = 14.8, 7.4$ , 3H);  $^{13}\text{C}$  NMR (125 MHz,  $\text{CD}_3\text{OD}$ )  $\delta$  173.2, 166.9, 162.0, 159.0, 150.1, 142.4, 139.3, 136.0, 121.8, 116.0, 77.2, 77.1, 74.0, 71.4, 69.3, 56.5, 52.7, 45.3, 43.6, 43.3, 41.1, 38.0, 37.5, 36.3, 32.7, 29.1, 26.5, 26.1, 20.1, 14.2; HRMS (ESI): Exact mass calculated for  $\text{C}_{31}\text{H}_{47}\text{N}_2\text{O}_9$   $[\text{M}+\text{H}]^+$ , 591.3282. Found  $[\text{M}+\text{H}]^+$ , 591.3277  $[\alpha]_{\text{D}}^{25} = +23.8$  ( $\text{CH}_3\text{OH}$ ),  $c = 0.24$ ). Reported  $[\alpha]_{\text{D}}^{25}$  for natural neopeltolide = +24 ( $\text{CH}_3\text{OH}$ ),  $c = 0.24$ ).<sup>7</sup>

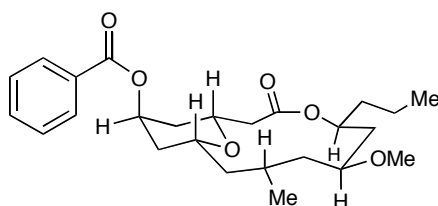

Analytic data for **44**: IR (film) 2956, 2917, 1851, 1719, 1653, 1559, 1456, 1273, 1115, 1087, 1071, 1026, 713  $\text{cm}^{-1}$ ,  $^1\text{H}$  NMR (500 MHz,  $\text{CDCl}_3$ )  $\delta$  8.02 (d,  $J = 8.5$ , 2H), 7.52 (dd,  $J = 7.5, 7.5$ , 1H), 7.42 (dd,  $J = 7.5, 7.5$ , 2H), 3.35 (app tt,  $J = 3$ , 1H), 5.07 (dddd,  $J = 14.5, 5, 5, 5$ , 1H), 4.11 (dddd,  $J = 6.5, 6.5, 2, 2$ , 1H), 3.68 (app tt,  $J = 10$ , 1H), 3.53 (app tt,  $J = 7.5$ , 1H), 3.26 (s, 3H), 2.55 (ddd,  $J = 14.5, 4.5$ , 1H), 2.32 (ddd,  $J = 14.5, 10.5$ , 1H), 1.88 (dd,  $J = 13.5, 11$ , 1H), 1.75 (m, 2H), 1.59–1.36 (m, 6H), 1.35–1.28 (m, 4H), 1.09 (ddd,  $J = 13, 11, 2$ , 2H), 0.92 (d,  $J = 6.5$ , 3H), 0.86 (dd,  $J = 6.5$ , 3H);  $^{13}\text{C}$  NMR ( $\text{CDCl}_3$ )  $\delta$  169.8, 164.7, 132.1, 129.4, 128.6, 127.4, 74.6, 74.5, 72.6, 68.9, 67.6, 55.2, 43.0, 41.5, 41.2, 38.9, 35.9, 35.3, 34.5, 29.9, 28.7, 24.5, 18.0, 12.9; LRMS (ESI): Mass calculated for  $\text{C}_{25}\text{H}_{36}\text{O}_6\text{Na}$   $[\text{M}+23]^+$ , 455. Found  $[\text{M}+23]^+$ , 455.  $[\alpha]_{\text{D}}^{25} = +26.4$  ( $\text{CH}_2\text{Cl}_2$ ),  $c = 0.09$ ).

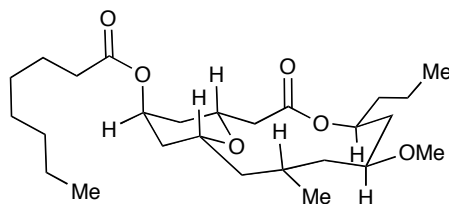

Analytic data for **45**: IR (film) 2951, 2922, 2852, 1731, 1459, 1372, 1268, 1245, 1163, 1088, 1062, 1033, 993  $\text{cm}^{-1}$ ,  $^1\text{H}$  NMR (500 MHz,  $\text{CD}_3\text{OD}$ )  $\delta$  5.19 (ddd,  $J = 9.5, 4.5, 4.5$ , 1H), 5.14 (app tt,  $J = 2.5$ , 1H), 4.07 (dddd,  $J = 5.5, 5.5, 1.5, 1.5$ , 1H), 3.68 (app tt,  $J = 10.5$ , 1H), 3.27 (s, 3H), 2.69 (ddd,  $J = 15, 4.5$ , 1H), 2.37 (dd,  $J = 7.5$ , 2H), 2.29 (ddd,  $J = 14.5, 11$ , 1H), 1.89 (dd,  $J = 11, 7$ , 1H), 1.80 (dd,  $J = 14.5, 2$ , 1H), 1.75–1.70 (m, 5H), 1.56–1.46 (m, 4H), 1.39–1.23 (m, 13H),

7. Wright, A. E.; Botelho, J. C.; Guzman, E.; Harmody, D.; Linley, P.; McCarthy, P. J.; Pitts, T. P.; Pomponi, S. A.; Reed, J. K. *J. Nat. Prod.* **2007**, *70*, 412–416.

1.13 (ddd,  $J = 12.5, 11, 1.5$ , 1H), 0.99 (d,  $J = 7$ , 3H), 0.95-0.89 (m, 6H);  $^{13}\text{C}$  NMR ( $\text{CD}_3\text{OD}$ )  $\delta$  174.6, 173.9, 77.1, 76.9, 73.7, 71.2, 62.3, 56.3, 45.1, 43.4, 43.1, 41.0, 37.9, 37.3, 36.1, 35.3, 32.8, 32.6, 30.1, 30.0, 26.1, 25.9, 23.6, 19.9, 14.4, 14.0; LRMS (ESI): Mass calculated for  $\text{C}_{26}\text{H}_{46}\text{O}_6\text{Na}$   $[\text{M}+23]^+$ , 477. Found  $[\text{M}+23]^+$ , 477.  $[\alpha]_{\text{D}}^{25} = +28.6$  ( $\text{CH}_2\text{Cl}_2$ ),  $c = 0.43$ .

Comparison of  $^{13}\text{C}$  Spectral Data of Neopeltolide, 1, and 2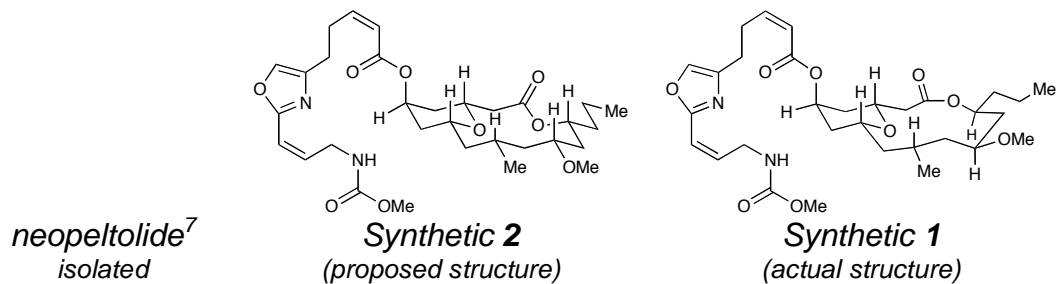

|       |       |       |
|-------|-------|-------|
| 14.1  | 12.9  | 14.2  |
| 20.0  | 18.4  | 20.1  |
| 26.0  | 23.9  | 26.1  |
| 26.4  | 25.1  | 26.5  |
| 29.0  | 27.7  | 29.1  |
| 32.6  | 34.3  | 32.7  |
| 36.2  | 34.8  | 36.3  |
| 37.4  | 35.8  | 37.5  |
| 37.9  | 37.5  | 38.0  |
| 41.0  | 39.7  | 41.1  |
| 41.0  | 40.0  | 41.1  |
| 43.2  | 41.9  | 43.3  |
| 43.5  | 44.3  | 43.6  |
| 45.2  | 44.8  | 45.3  |
| 52.6  | 51.3  | 52.7  |
| 56.4  | 55.3  | 56.5  |
| 69.2  | 67.7  | 69.3  |
| 71.3  | 71.5  | 71.4  |
| 73.9  | 74.4  | 74.0  |
| 77.0  | 75.2  | 77.1  |
| 77.1  | 83.2  | 77.2  |
| 115.7 | 114.7 | 116.2 |
| 121.7 | 120.4 | 121.8 |
| 135.9 | 134.7 | 136.0 |
| 139.2 | 137.9 | 139.3 |
| 142.3 | 141.0 | 142.4 |
| 150.0 | 148.8 | 150.1 |
| 159.6 | 158.4 | 159.0 |
| 161.9 | 160.6 | 162.0 |
| 166.9 | 165.6 | 166.9 |
| 173.0 | 173.4 | 173.2 |

**Comparison of  $^1\text{H}$  Spectral Data of Natural Neopeltolide and Synthetic Neopeltolide**

| Isolated neopeltolide | Synthetic neopeltolide (1)        |
|-----------------------|-----------------------------------|
| 0.92, t (7.6)         | 0.96, dd (7.4, 7.4)               |
| 0.94, d (6.9)         | 1.00, d (6.7)                     |
| 1.08, m               | 1.12, ddd (12.9, 10.9, 1.9)       |
| 1.25, m               | 1.25, m                           |
| 1.28, m               | 1.29, m                           |
| 1.33, m               | 1.29-1.44, m                      |
| 1.36, m               | 1.33, m                           |
| 1.38, m               | 1.36, m                           |
| 1.46, m               | 1.38, m                           |
| 1.48, m               | 1.48, m                           |
| 1.49, m               | 1.50-1.61, m                      |
| 1.54, m               | 1.54, m                           |
| 1.64, m               | 1.68-1.71, m                      |
| 1.68, m               | 1.73, m                           |
| 1.78, m               | 1.84, m                           |
| 1.83, m               | 1.89, ddd (14.2, 10.8)            |
| 2.26, dd (15.1, 11.0) | 2.32, dd (14.7, 10.8)             |
| 2.66, dd (15.1, 4.1)  | 2.72, dd (10.8, 3.7)              |
| 2.68, dd (7.6, 7.6)   | 2.74, dd (7.3, 7.3)               |
| 2.98, m               | 3.03, ddd (7.5, 7.5, 7.5)         |
| 3.23, s               | 3.29, s                           |
| 3.55, bt (10.3)       | 3.56, dd (9.8, 9.8)               |
| 3.62, s               | 3.66 (s)                          |
| 3.64, m               | 3.68, dd (9.5, 9.5)               |
| 4.04, ddt (4.1, 2.1)  | 4.09, dddd (11.3, 11.3, 4.2, 2.1) |
| 4.28, bd (4.8)        | 4.32, d (4.9)                     |
| 5.14, dt (4.8, 9.6)   | 5.16, m                           |
| 5.17, m               | 5.21, m                           |
| 5.86, dt (11.7, 1.4)  | 5.90, ddd (13.1, 3.3, 1.6)        |
| 6.02, dt (11.7, 6.2)  | 6.05, ddd (11.9, 6.0, 6.0)        |
| 6.24, dt (11.7, 6.2)  | 6.29, ddd (11.9, 4.2, 2.1)        |
| 6.33, dt (11.7, 7.6)  | 6.40, ddd (11.5, 7.4, 7.4)        |
| 7.64, s               | 7.67, s                           |

**Selected NMR Spectra ( $^1\text{H}$ ,  $^{13}\text{C}$ , NOE, NOESY)**



H1\_std P-inova500 H/C probe RT  
Path: \660056\1s\08\48:07 CST 2007  
Solvent: CDCl3

Spectrometer: Inova500  
Nucleus: H1

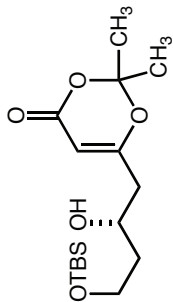

S25

| INDEX | FREQUENCY | PPM   | HEIGHT |
|-------|-----------|-------|--------|
| 1     | 2670.429  | 5.344 | 15.8   |
| 2     | 850.005   | 1.701 | 54.4   |
| 3     | 845.611   | 1.692 | 51.3   |
| 4     | 449.590   | 0.900 | 151.2  |
| 5     | 44.292    | 0.089 | 86.2   |

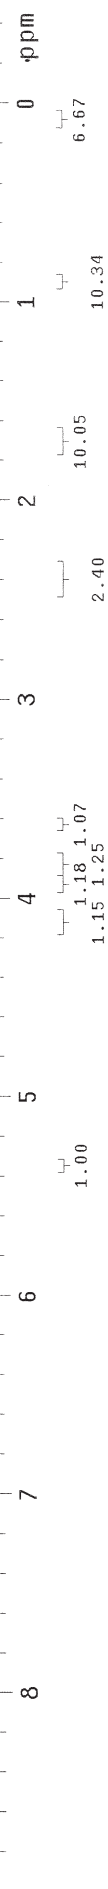

C13 std p-500 H/C probe RT  
Path: \\0101066e:621612:30 CST 2007  
Solvent: CDCl3  
File: dwc5-aldol1CS  
Spectrometer: Inova500  
Nucleus: C13

| INDEX | FREQUENCY | PPM     | HEIGHT |
|-------|-----------|---------|--------|
| 1     | -4911.401 | -39.085 | 0.0    |

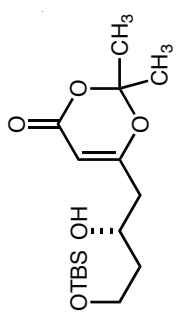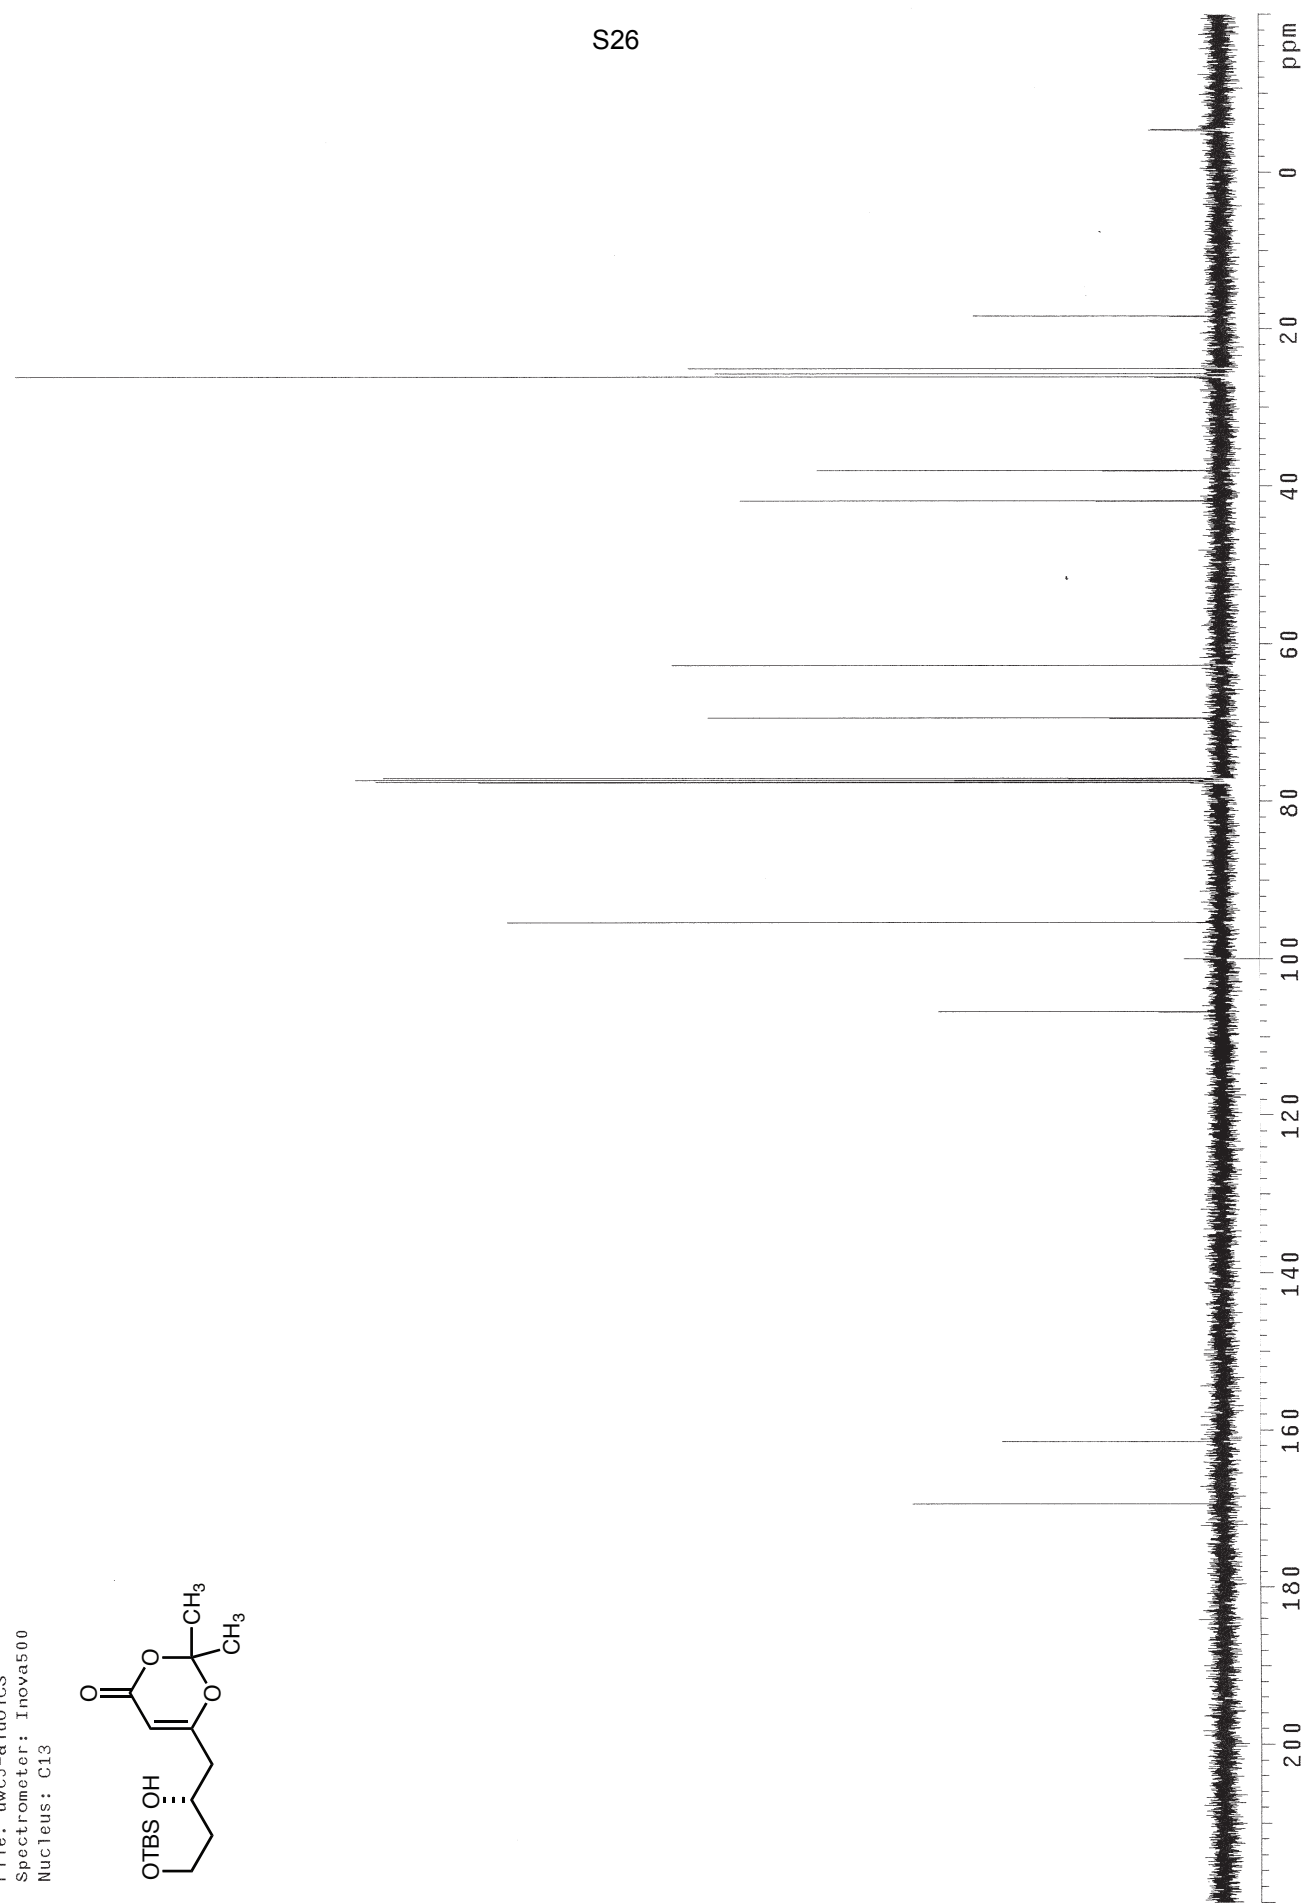

H1\_std P-inova500 H/C probe RT  
 Path: \\bbp\share\921644\4:12 CST 2007  
 Solvent: CDCl3  
 File: dwc5-realbissilyl etherHS  
 Spectrometer: Inova500  
 Nucleus: H1

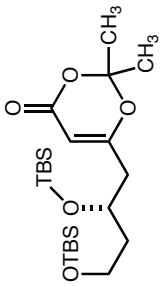

S27

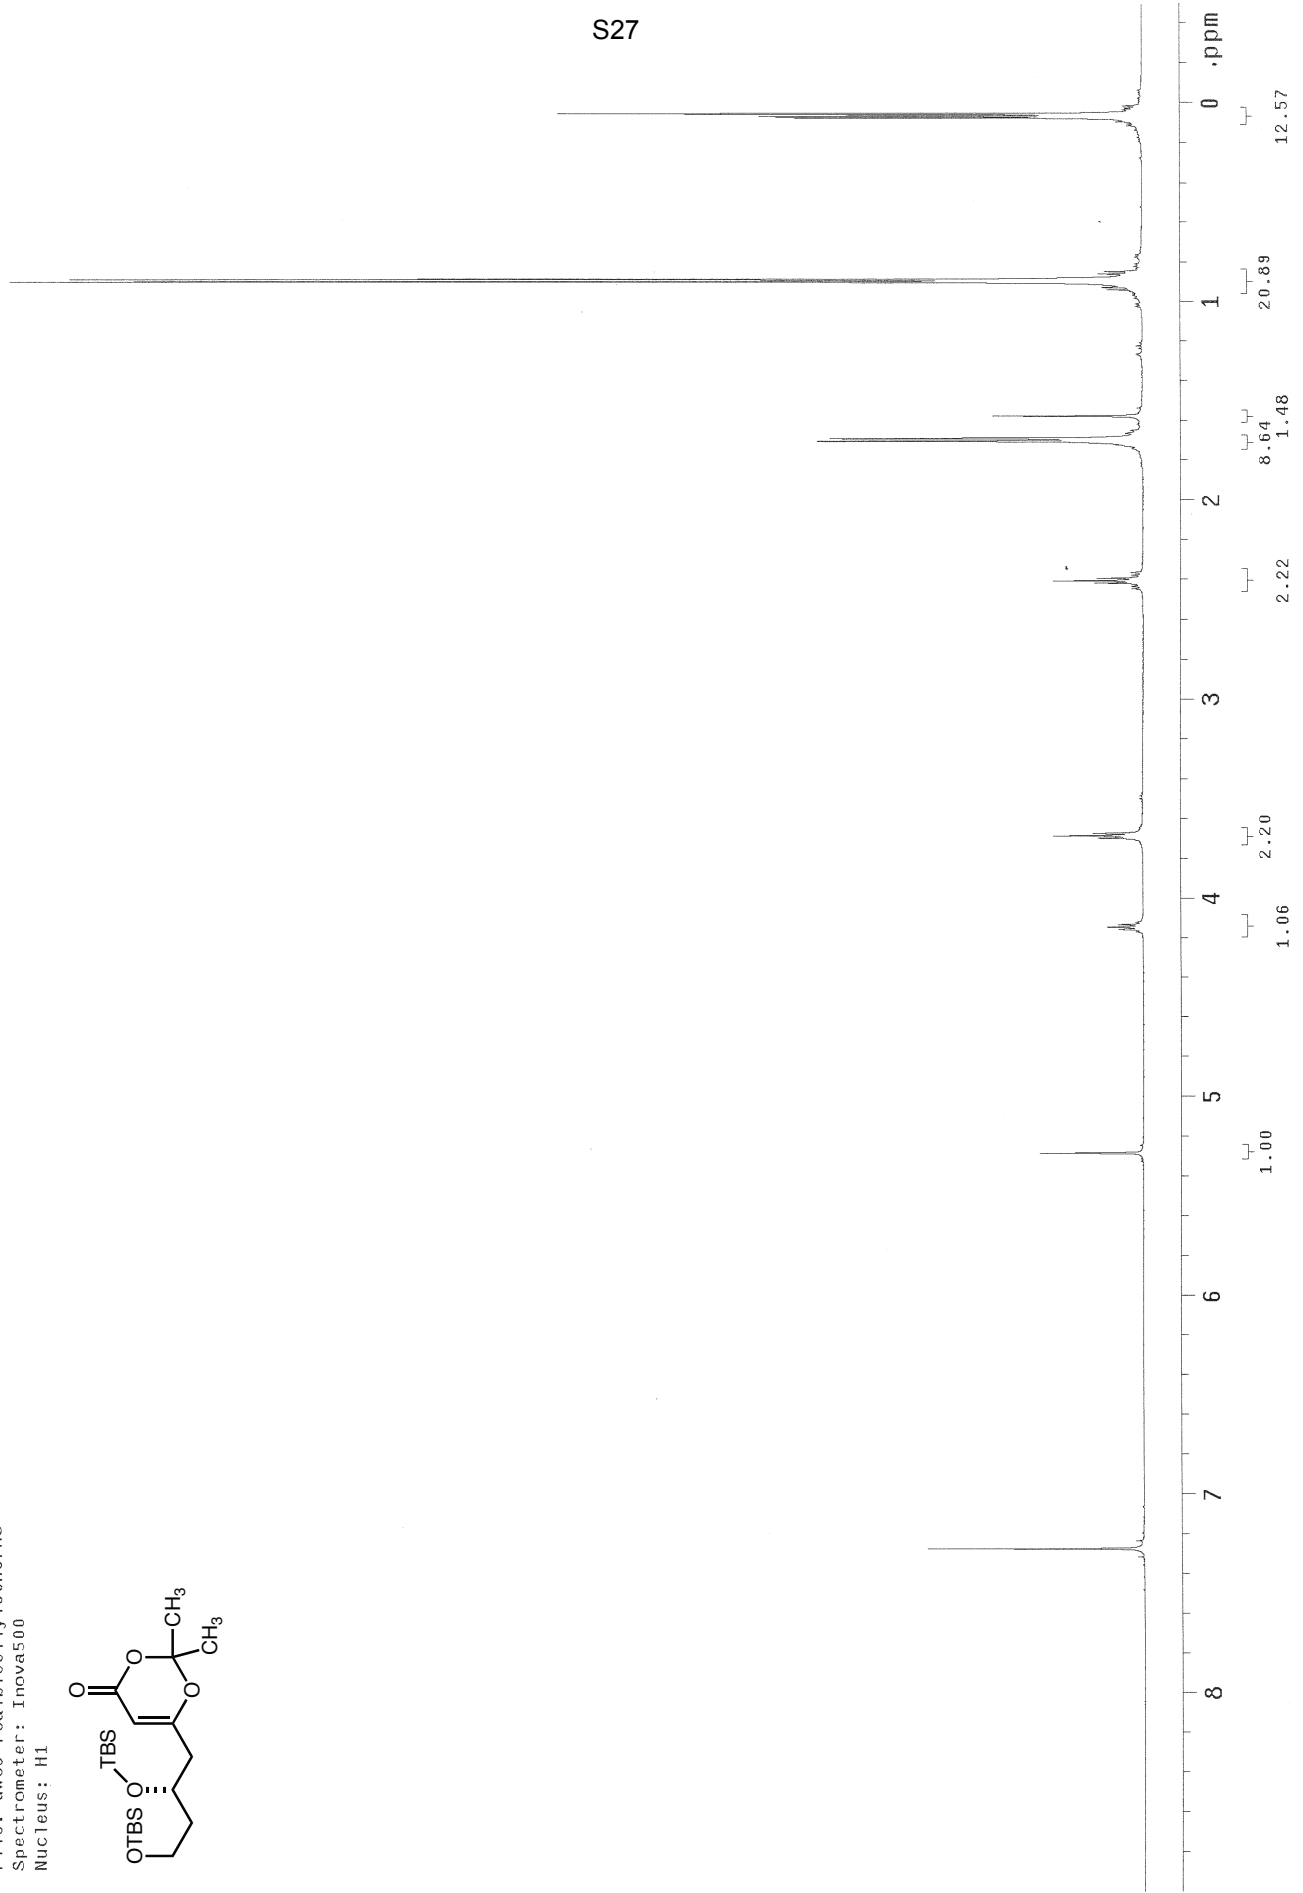

| INDEX | FREQUENCY | PPM    | HEIGHT |
|-------|-----------|--------|--------|
| 1     | 9740.993  | 77.518 | 396.9  |
| 2     | 9708.995  | 77.263 | 404.7  |
| 3     | 9677.530  | 77.013 | 400.8  |

C13 std p-500 H/C probe RT  
 Path: \\bbp\B&E:621045:11 GST 2007  
 Solvent: CDCl3  
 File: dwc5-bissilyl etherC  
 Spectrometer: Inova500  
 Nucleus: C13

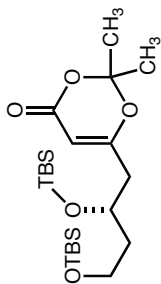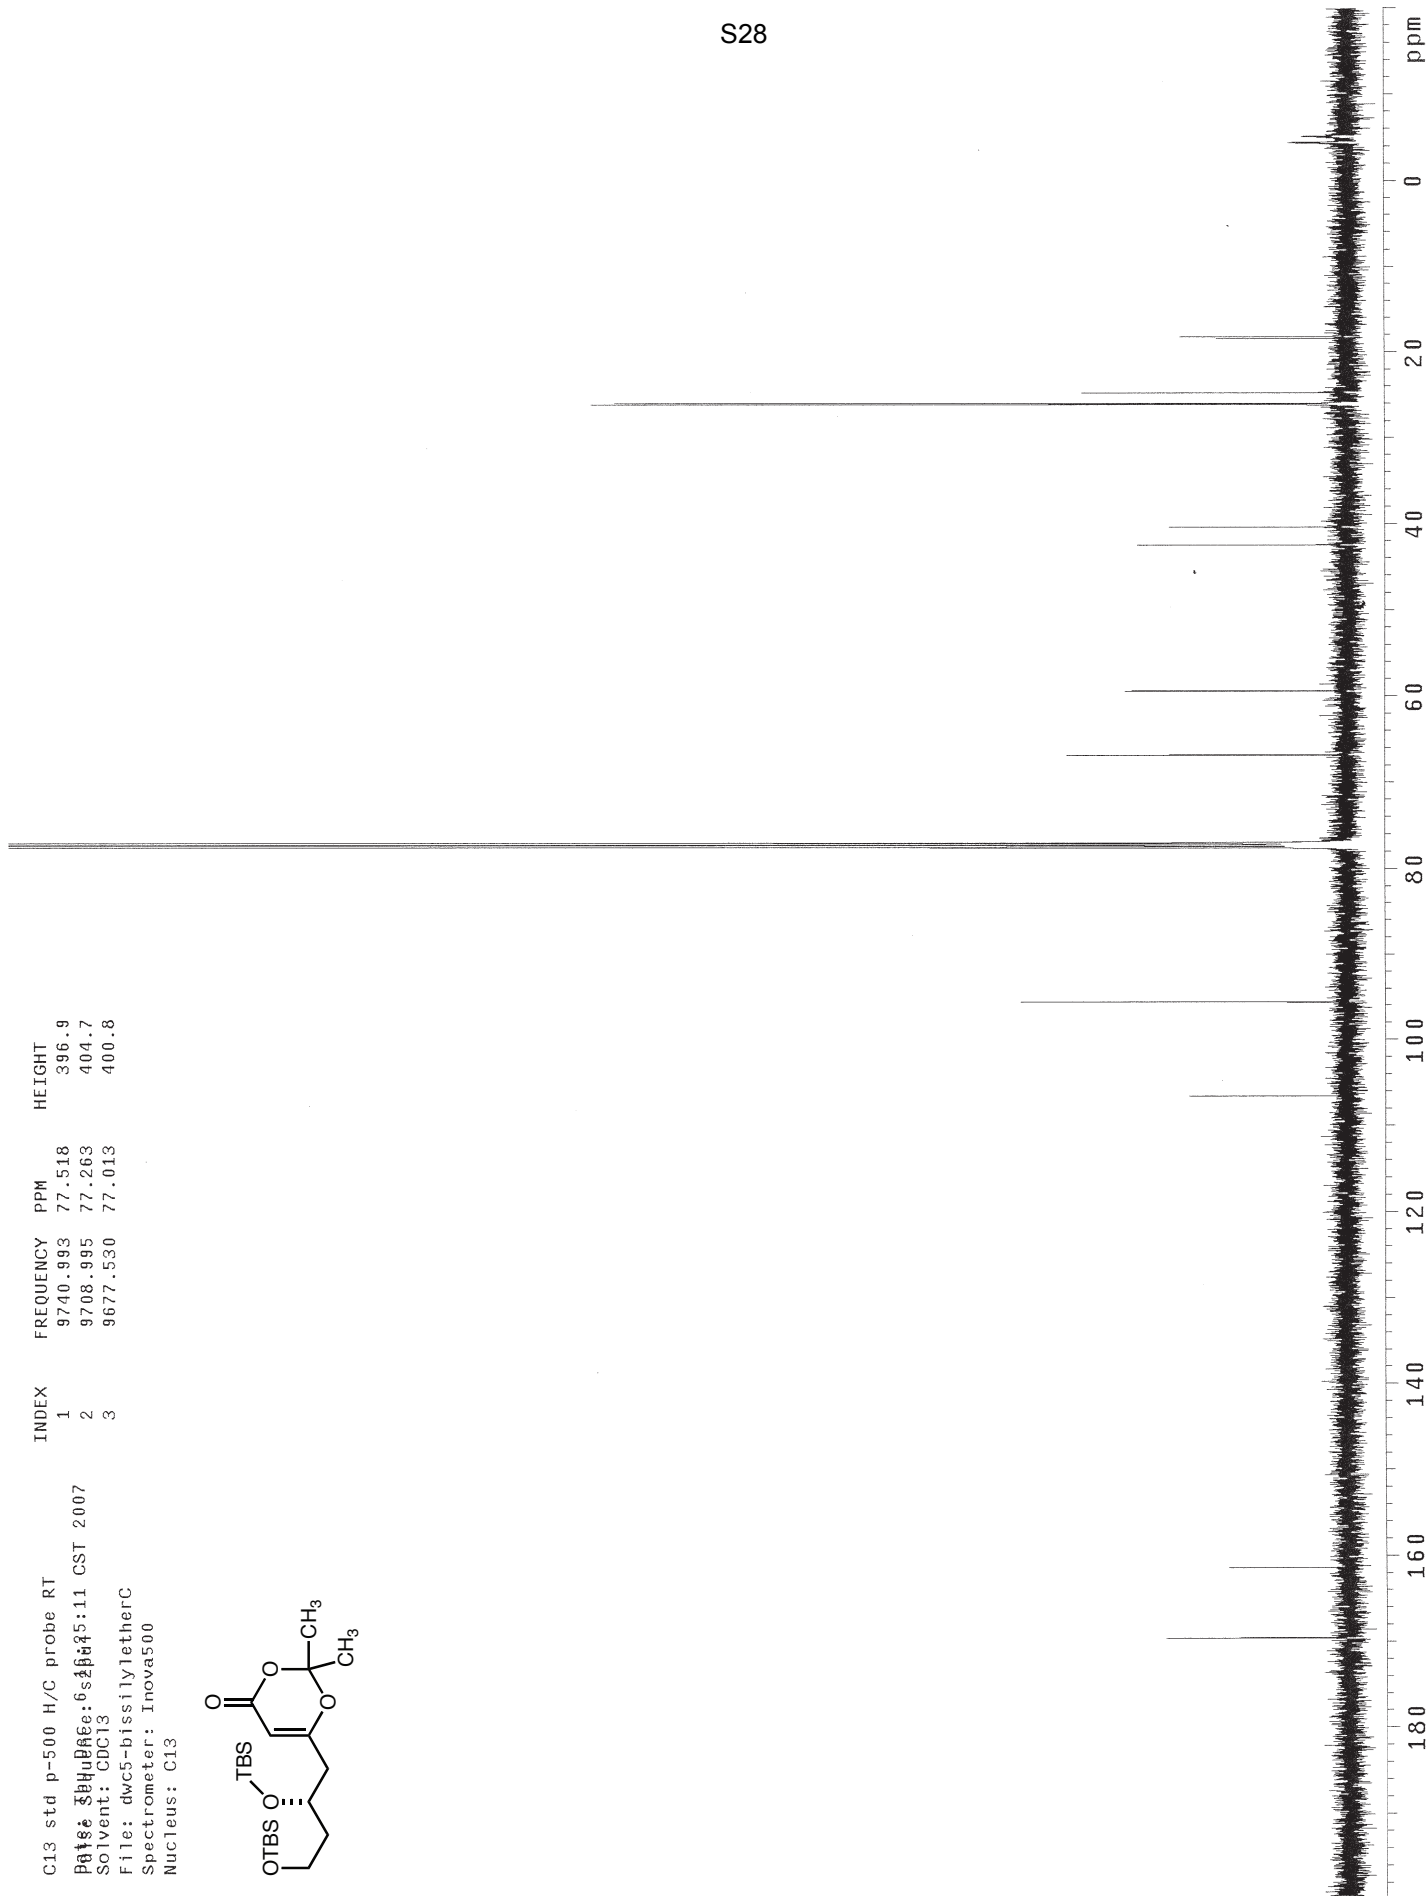

H1\_std P-inova500 H/C probe RT INDEX FREQUENCY PPM HEIGHT  
1 -1501.212 -3.004 0.0

Path: \\h101\share\6521646:53 CST 2007  
Solvent: CDCl3  
File: dwc5-alcoholHS  
Spectrometer: Inova500  
Nucleus: H1

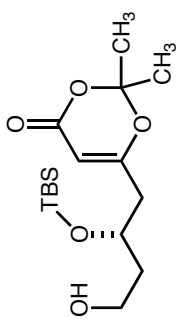

S29

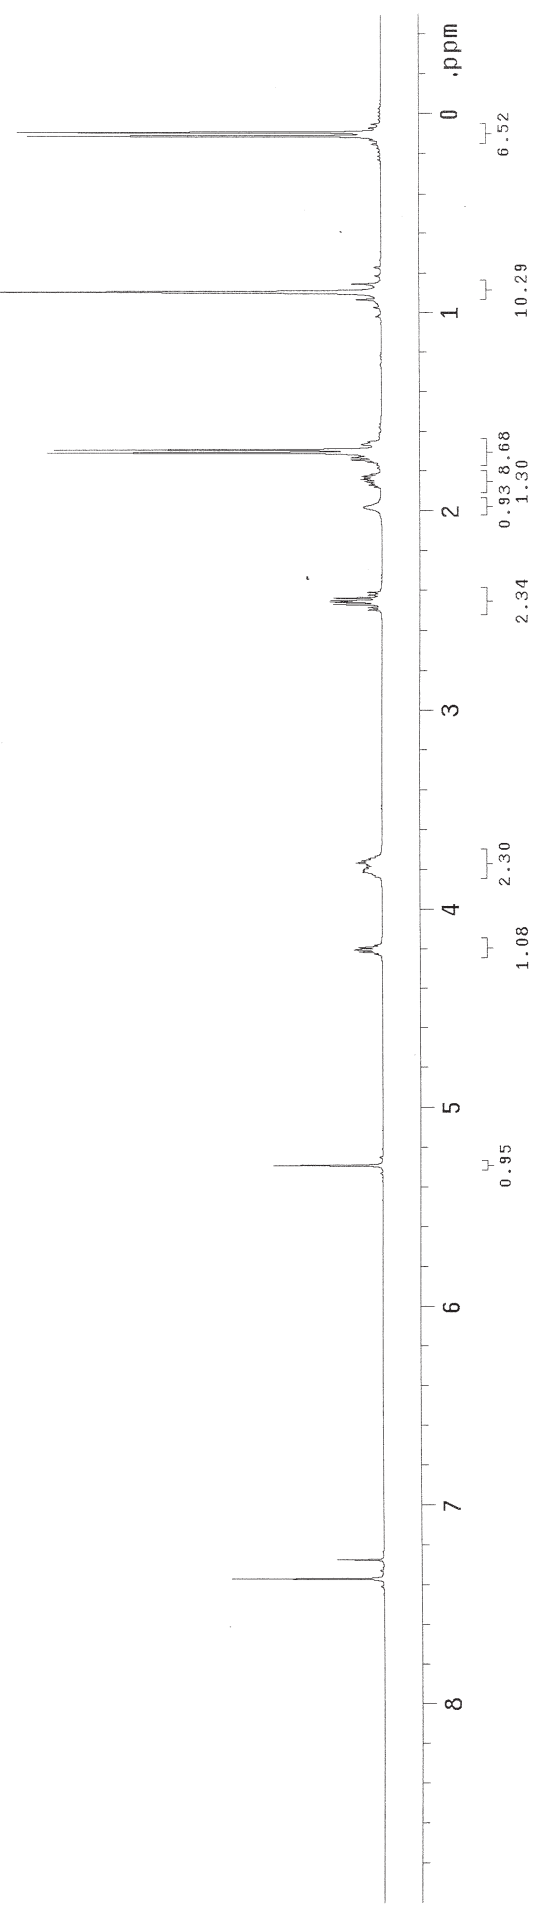

INDEX 1 FREQUENCY PPM HEIGHT 0.0

C13 std p-500 H/C probe RT  
File: dmc5-alcohol1C  
Solvent: CDCl3  
Spectrometer: Inova500  
Nucleus: C13

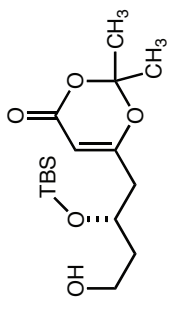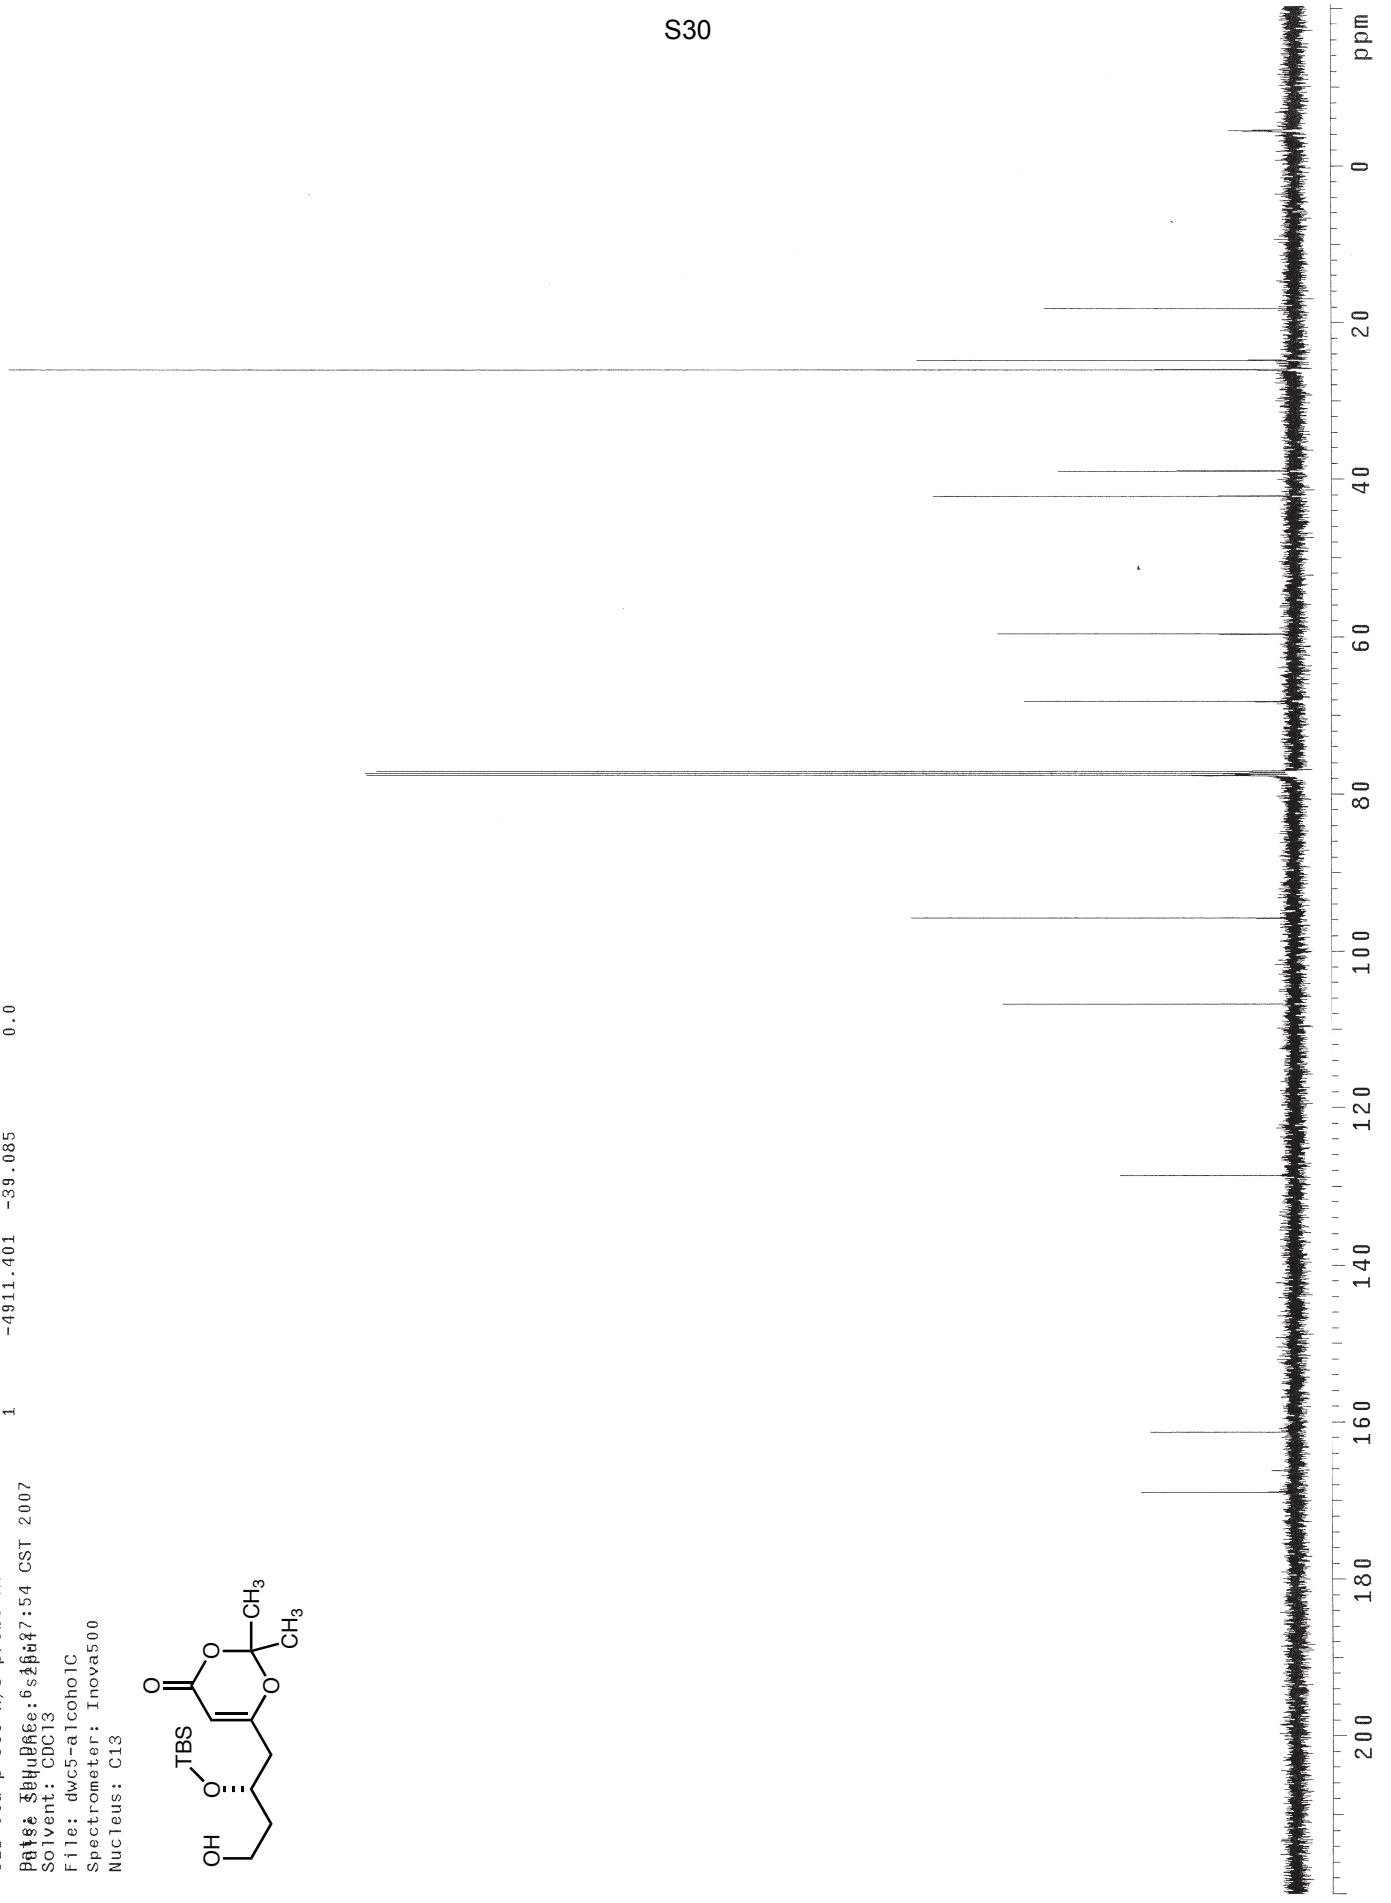

H1\_std P-inova500 H/C probe RT  
 Path: \\h1pfe:6s2pfe:49 CST 2007  
 Solvent: CDCl3  
 File: dwc5-carboxylicacidH  
 Spectrometer: Inova500  
 Nucleus: H1

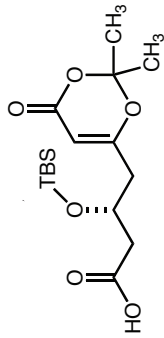

S31

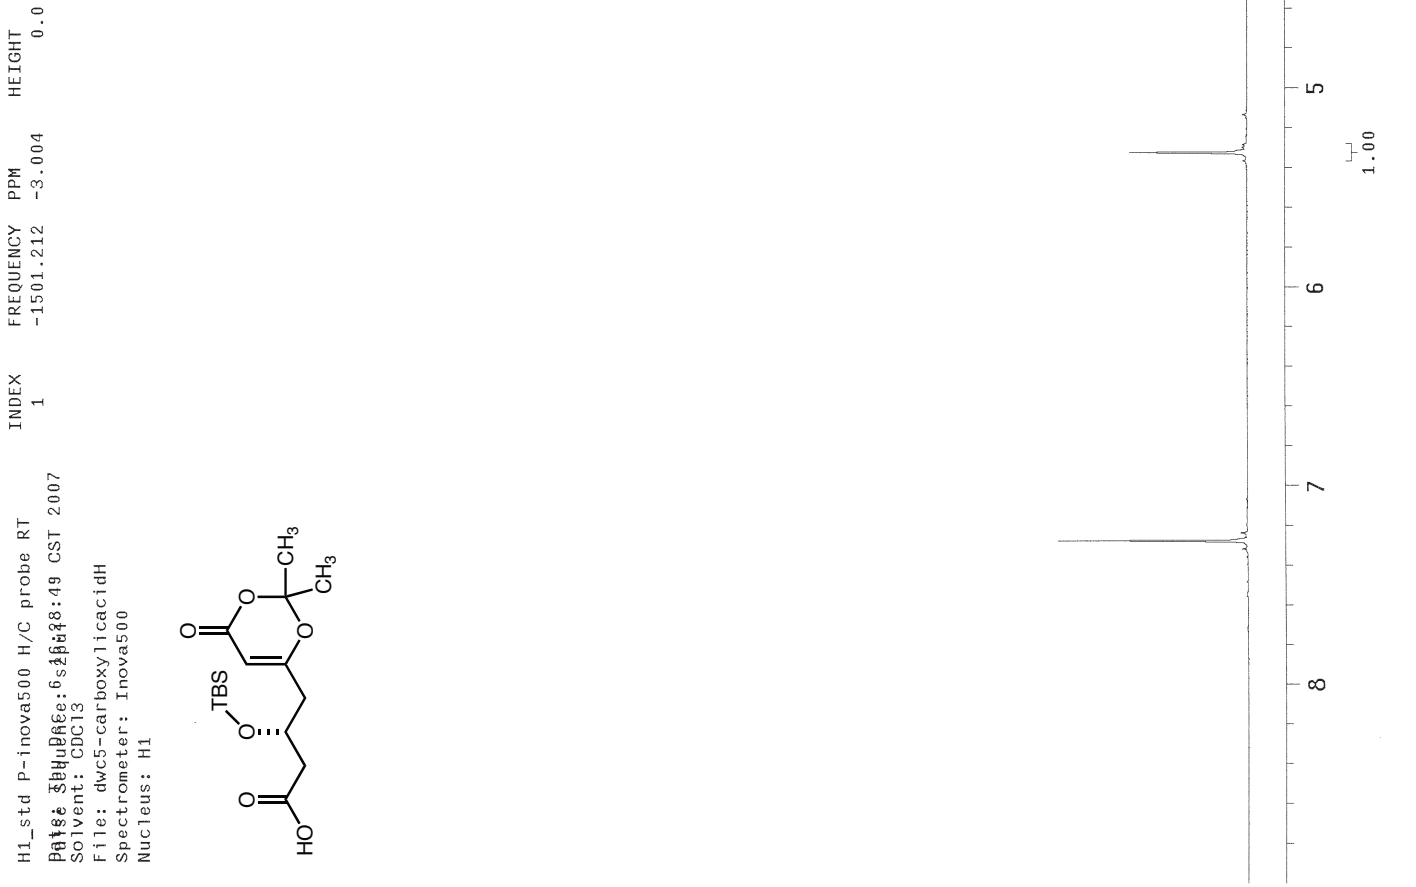

C13 std p-500 H/C probe RT  
 Path: \\BBU\BRe:5s\B49:56 CST 2007  
 Solvent: CDCl3  
 File: dwc5-CarboxylicC2  
 Spectrometer: Inova500  
 Nucleus: C13

| INDEX | FREQUENCY | PPM    | HEIGHT |
|-------|-----------|--------|--------|
| 1     | 9742.059  | 77.526 | 445.2  |
| 2     | 9710.061  | 77.272 | 456.6  |
| 3     | 9678.063  | 77.017 | 448.7  |

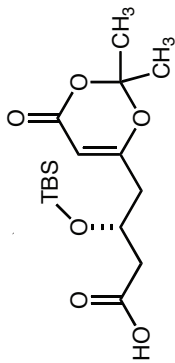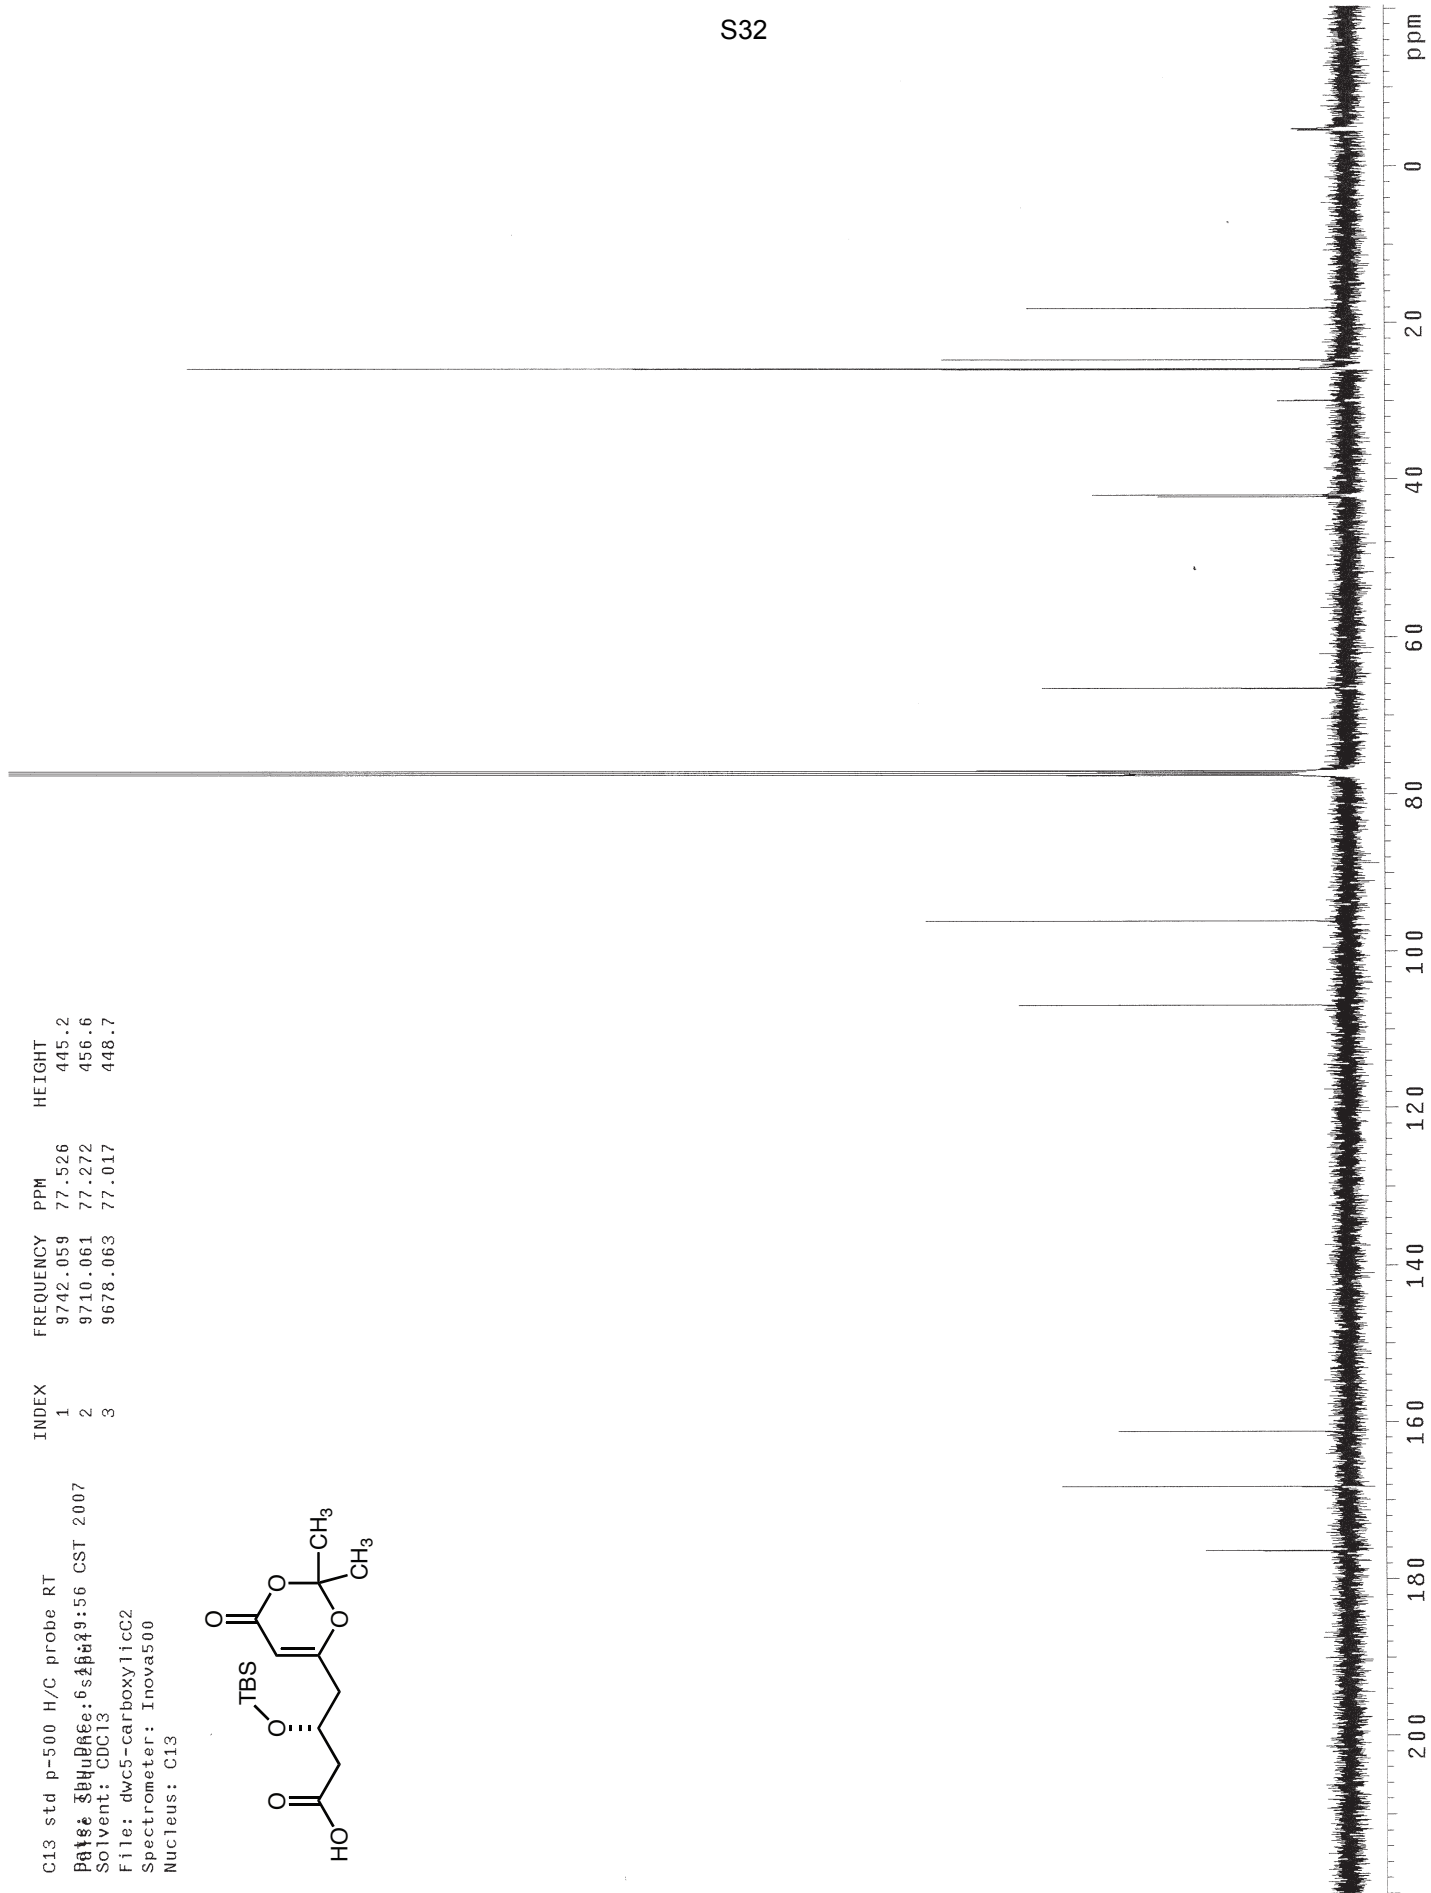



H1\_std P-inova500 H/C probe RT  
Date: 20070515:46 CST 2007  
Solvent: CDCl3  
File: 1  
Spectrometer: Inova500  
Nucleus: H1

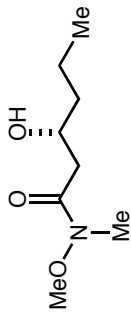

S33

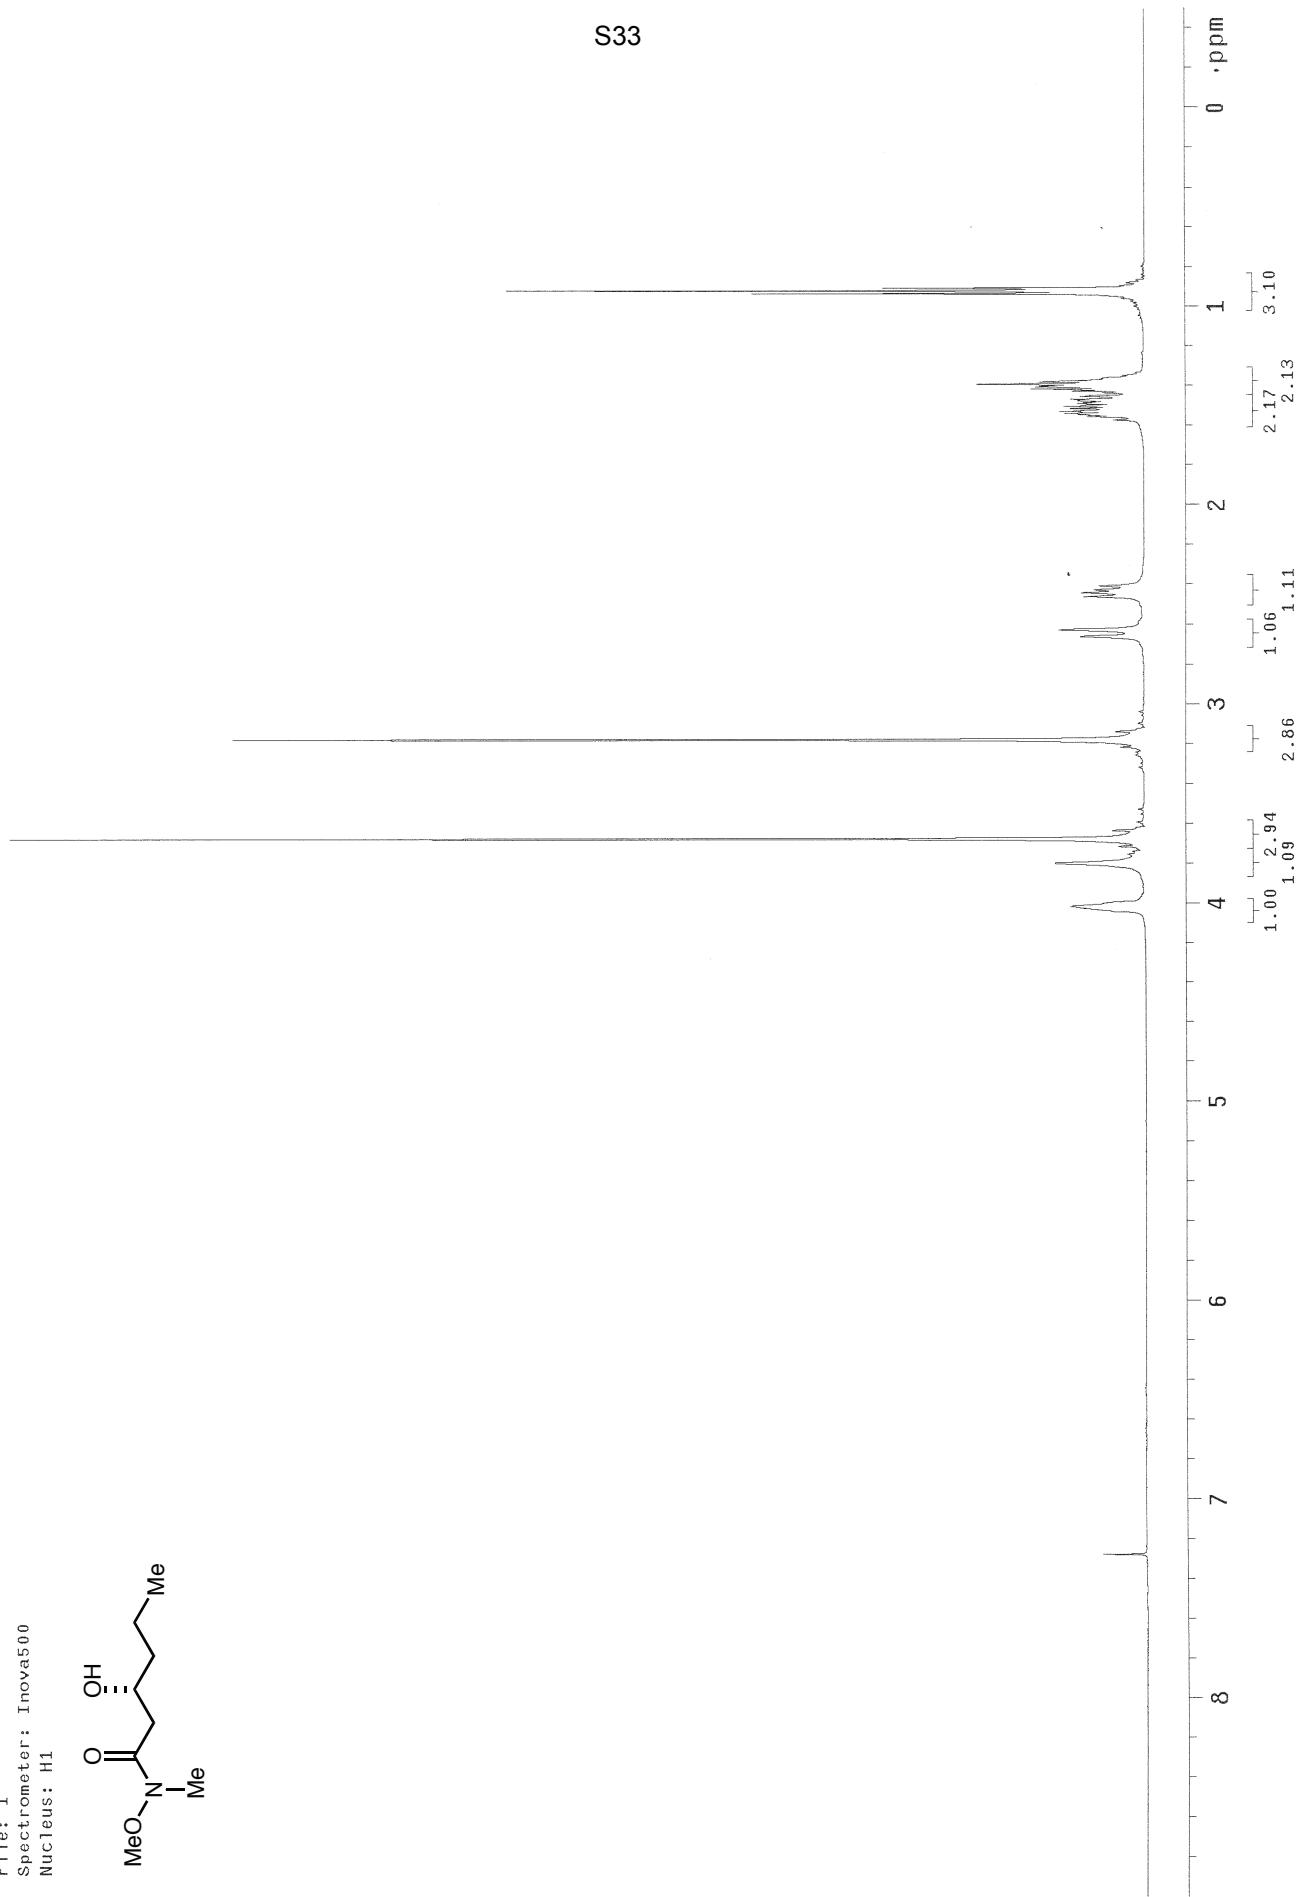

C13 std p-500 H/C probe RT  
Path: 500000:5s16:16:11 CST 2007  
Solvent: CDCl3  
File: 1  
Spectrometer: Inova500  
Nucleus: C13

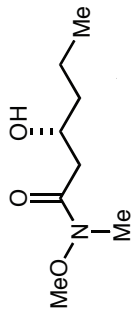

| INDEX | FREQUENCY | PPM     | HEIGHT |
|-------|-----------|---------|--------|
| 1     | -4922.527 | -39.173 | 0.0    |

S34

ppm

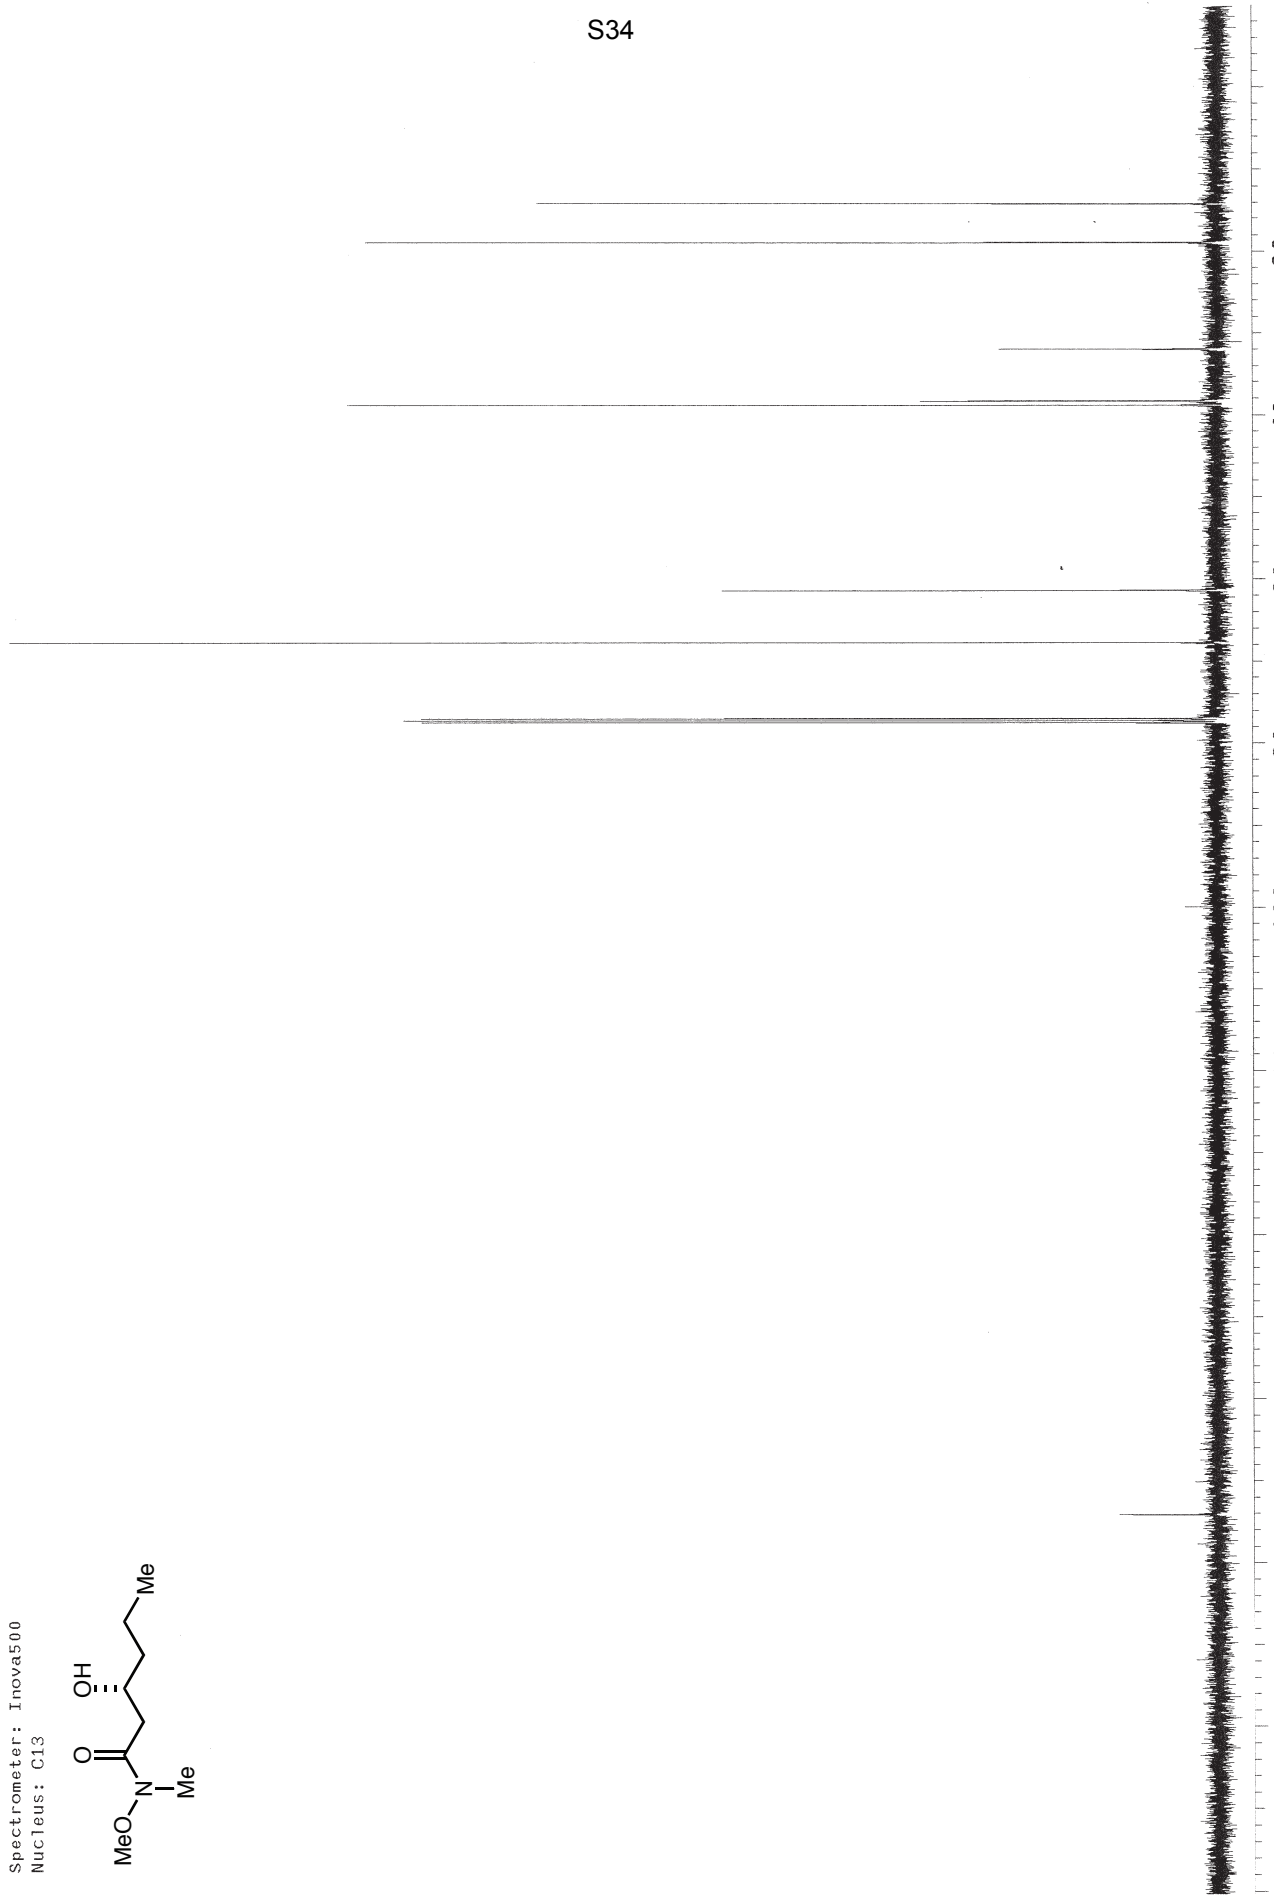

TZ:1-188

Path: 0000000e:52112:31 CST 2007

Solvent: CDCl3

File: 1

Spectrometer: Inova500

Nucleus: H1

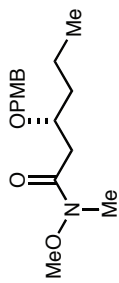

S35

INDEX 1  
FREQUENCY PPM -1510.020 -3.022  
HEIGHT 0.0

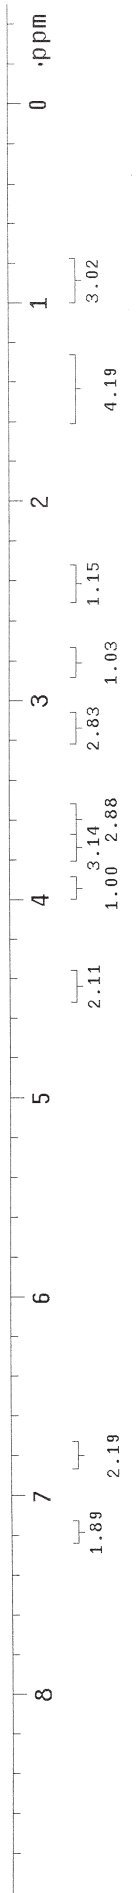

C13 std p-500 H/C probe RT INDEX FREQUENCY PPM HEIGHT

1 -4946.524 -39.364 0.0

Path: 0000014:08 CST 2007  
Solvent: CDCl3  
File: 1  
Spectrometer: Inova500  
Nucleus: C13

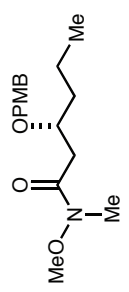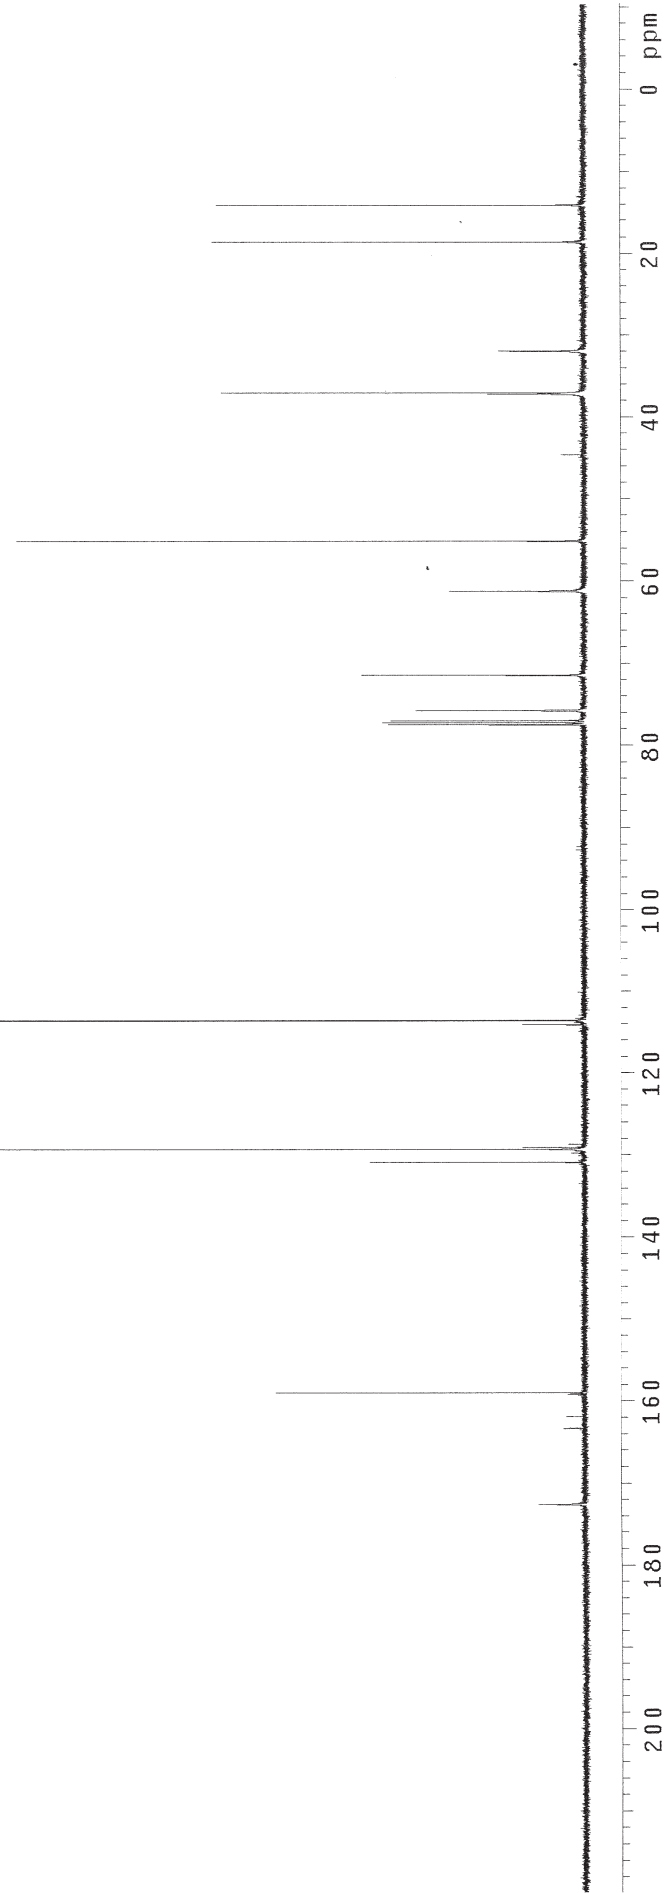

TZ:1-229, f11  
INDEX 1  
FREQUENCY PPM -1510.020 -3.022  
HEIGHT 0.0

Path: N000005:5406:19 CST 2007  
Solvent: CDCl3  
File: 1  
Spectrometer: Inova500  
Nucleus: H1

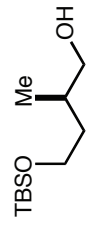

S37

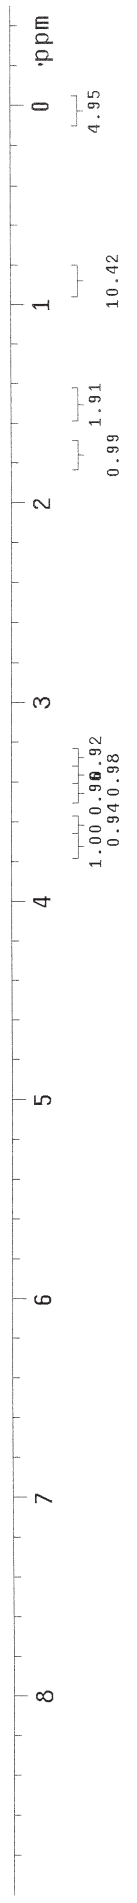

TZ:1-229

Path: H000000e.5s01001:31 CST 2007

Solvent: CDCl3

File: 1

Spectrometer: Inova500

Nucleus: C13

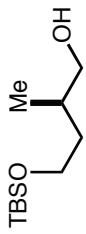

| INDEX | FREQUENCY | PPM     | HEIGHT |
|-------|-----------|---------|--------|
| 1     | -4920.394 | -39.156 | 0.0    |

S38

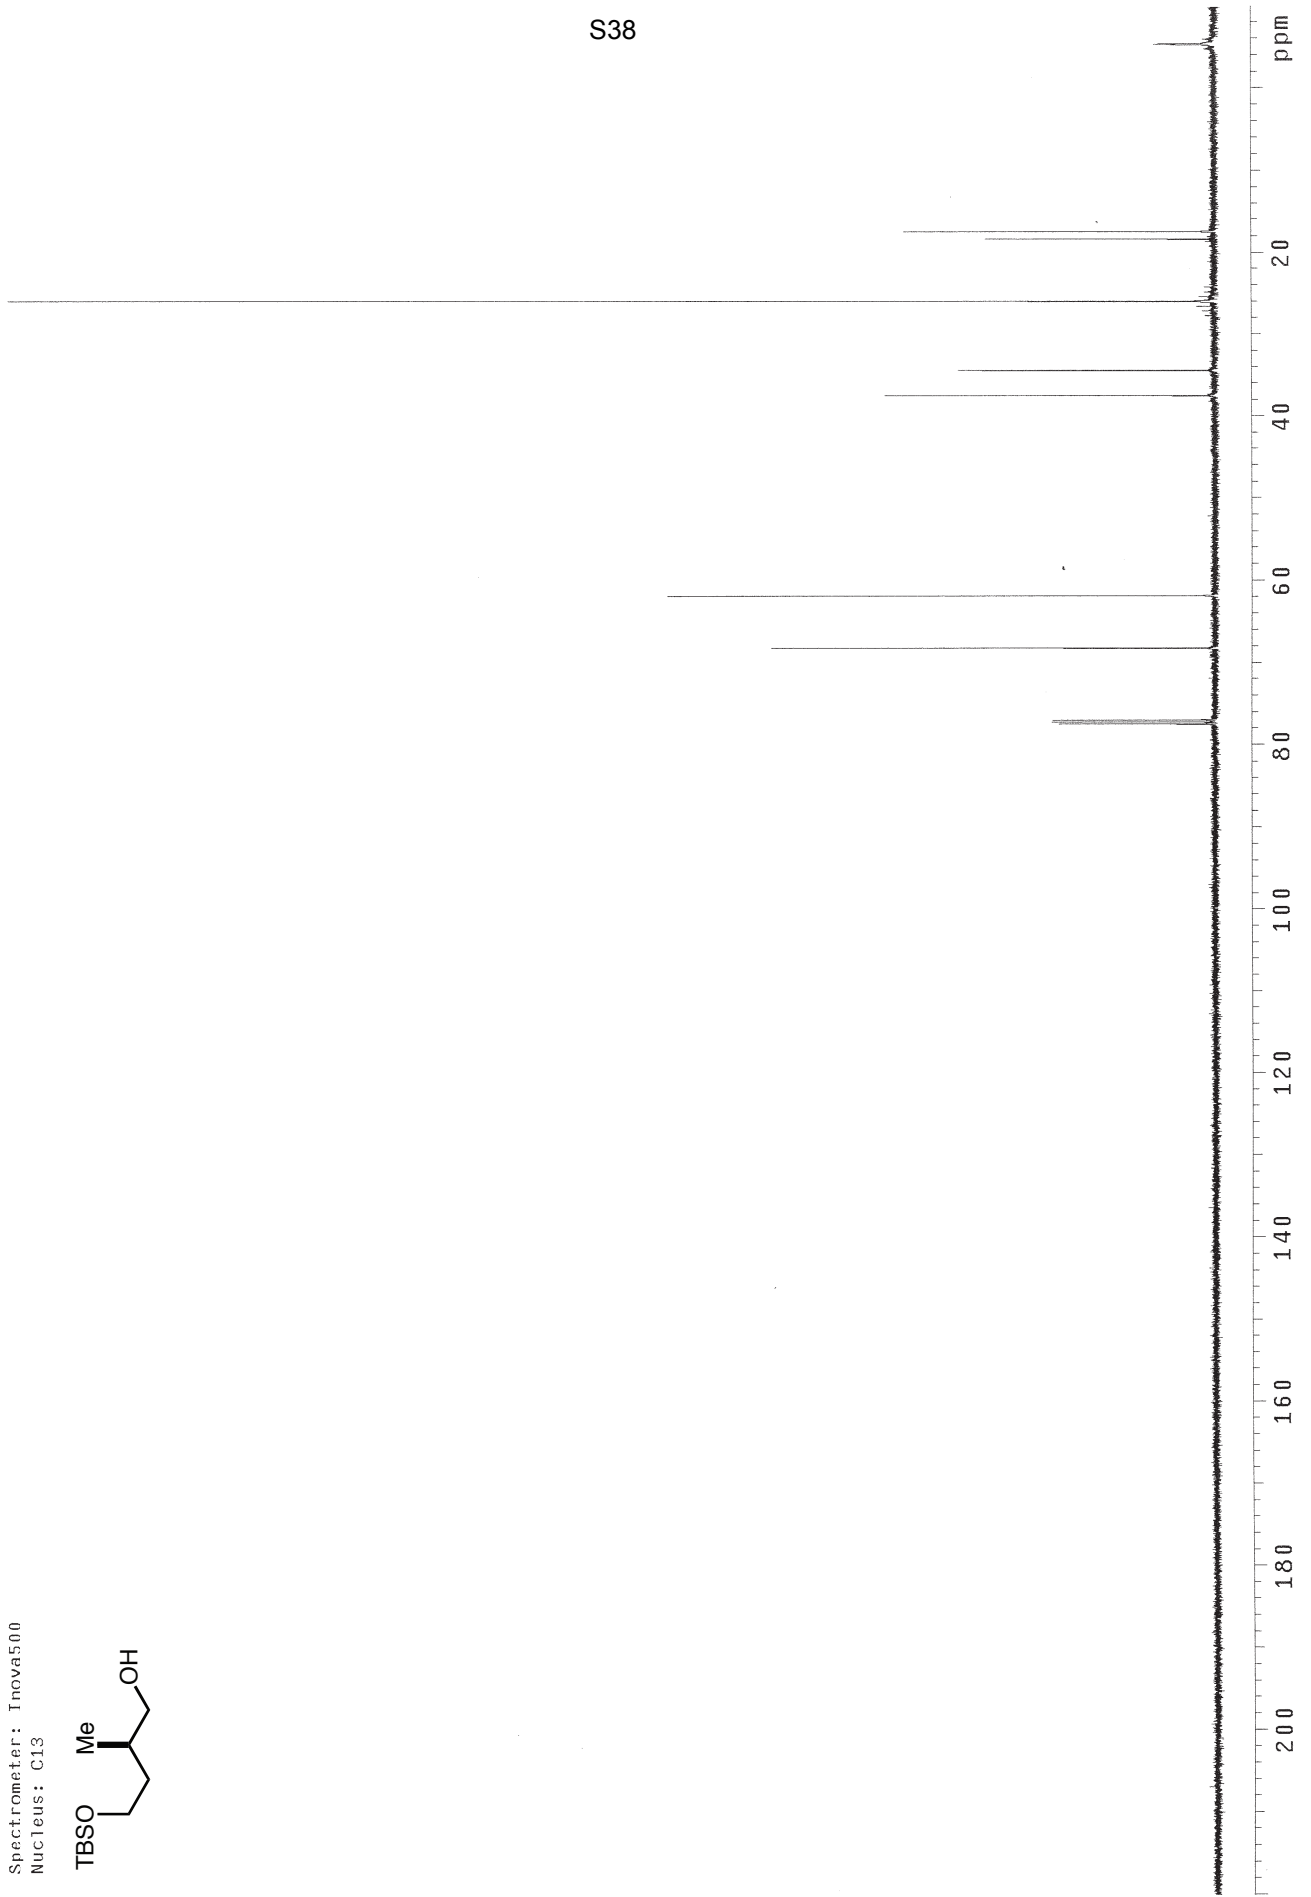



C13 std p-500 H/C probe RT  
Path: N00000510:10:35 CST 2007  
Solvent: CDCl3  
File: 1  
Spectrometer: Inova500  
Nucleus: C13

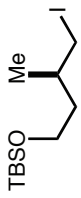

| INDEX | FREQUENCY | PPM     | HEIGHT |
|-------|-----------|---------|--------|
| 1     | -4920.394 | -39.156 | 0.0    |

S40

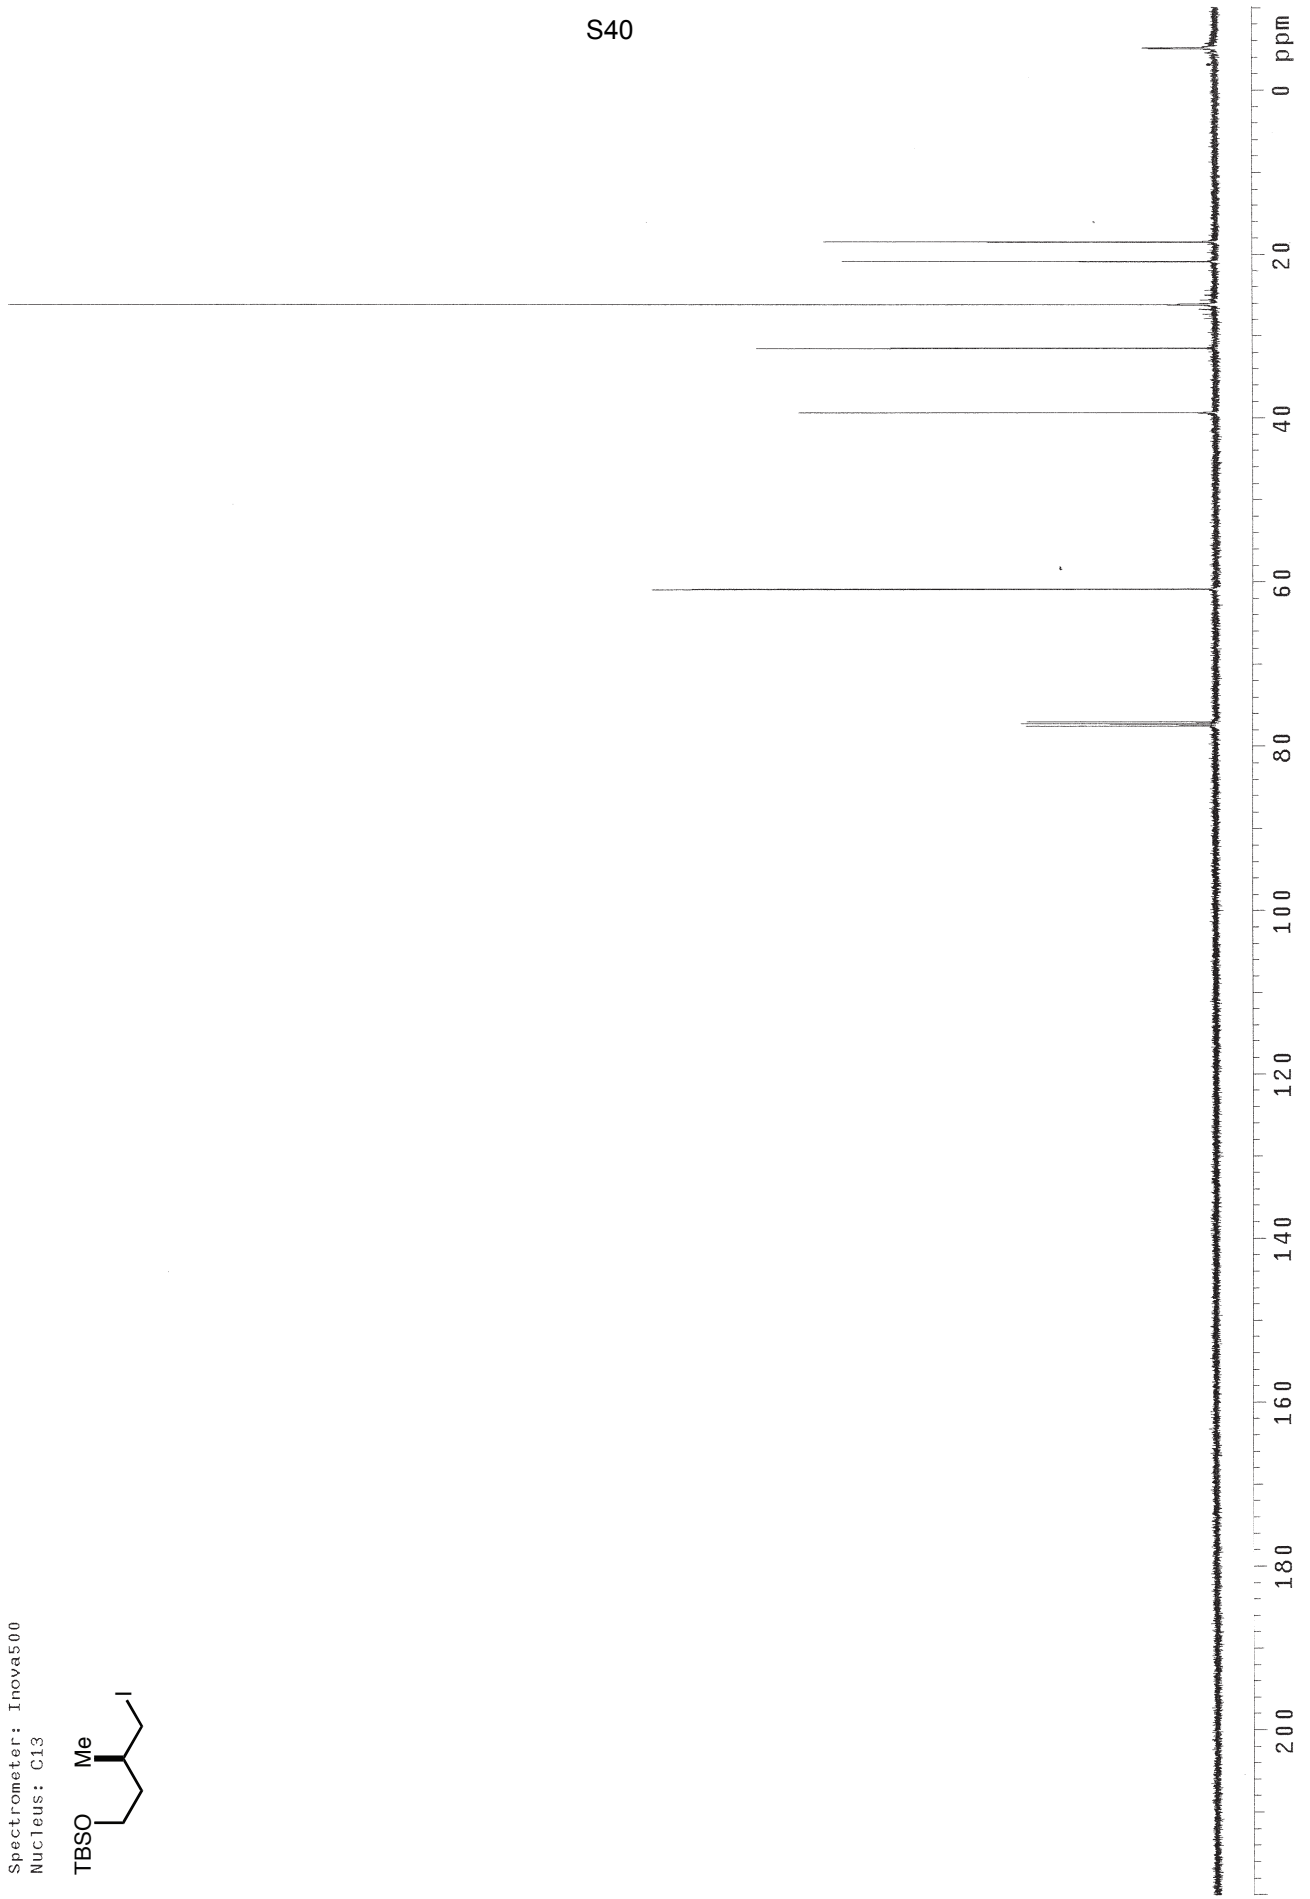



TZ:1-232  
INDEX 1  
FREQUENCY PPM -1510.020  
HEIGHT 0.0

Path: NetPath\05:54\0:10 CST 2007  
Solvent: CDCl3  
File: 1  
Spectrometer: Inova500  
Nucleus: H1

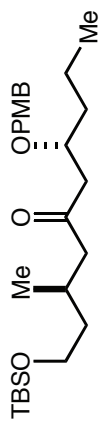

S41

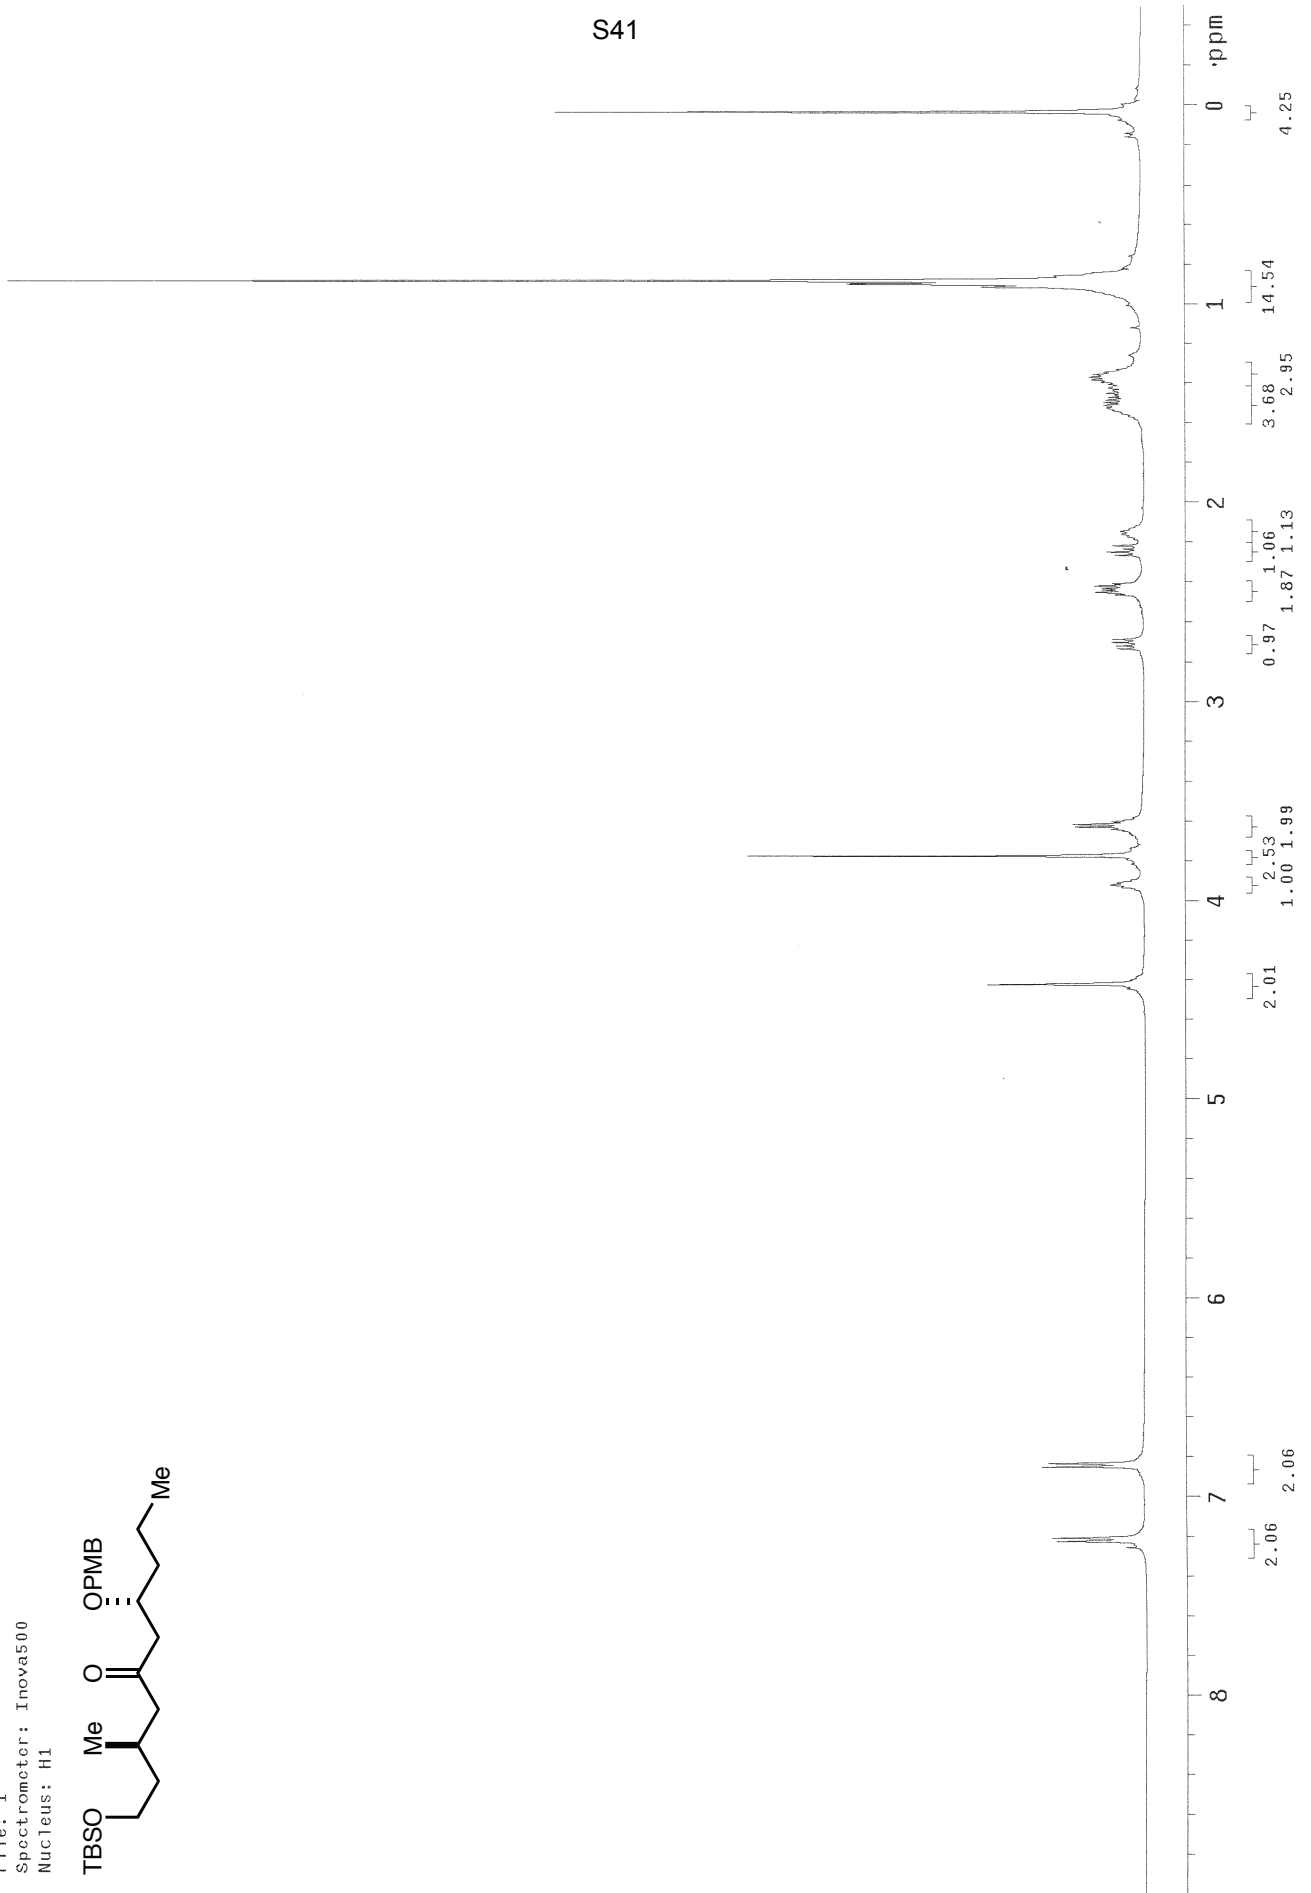

C13 std p-500 H/C probe RT INDEX FREQUENCY PPM HEIGHT

0.0  
-4911.401 -39.085

1  
-4911.401 -39.085

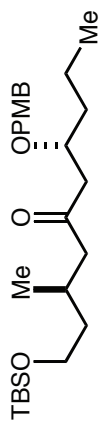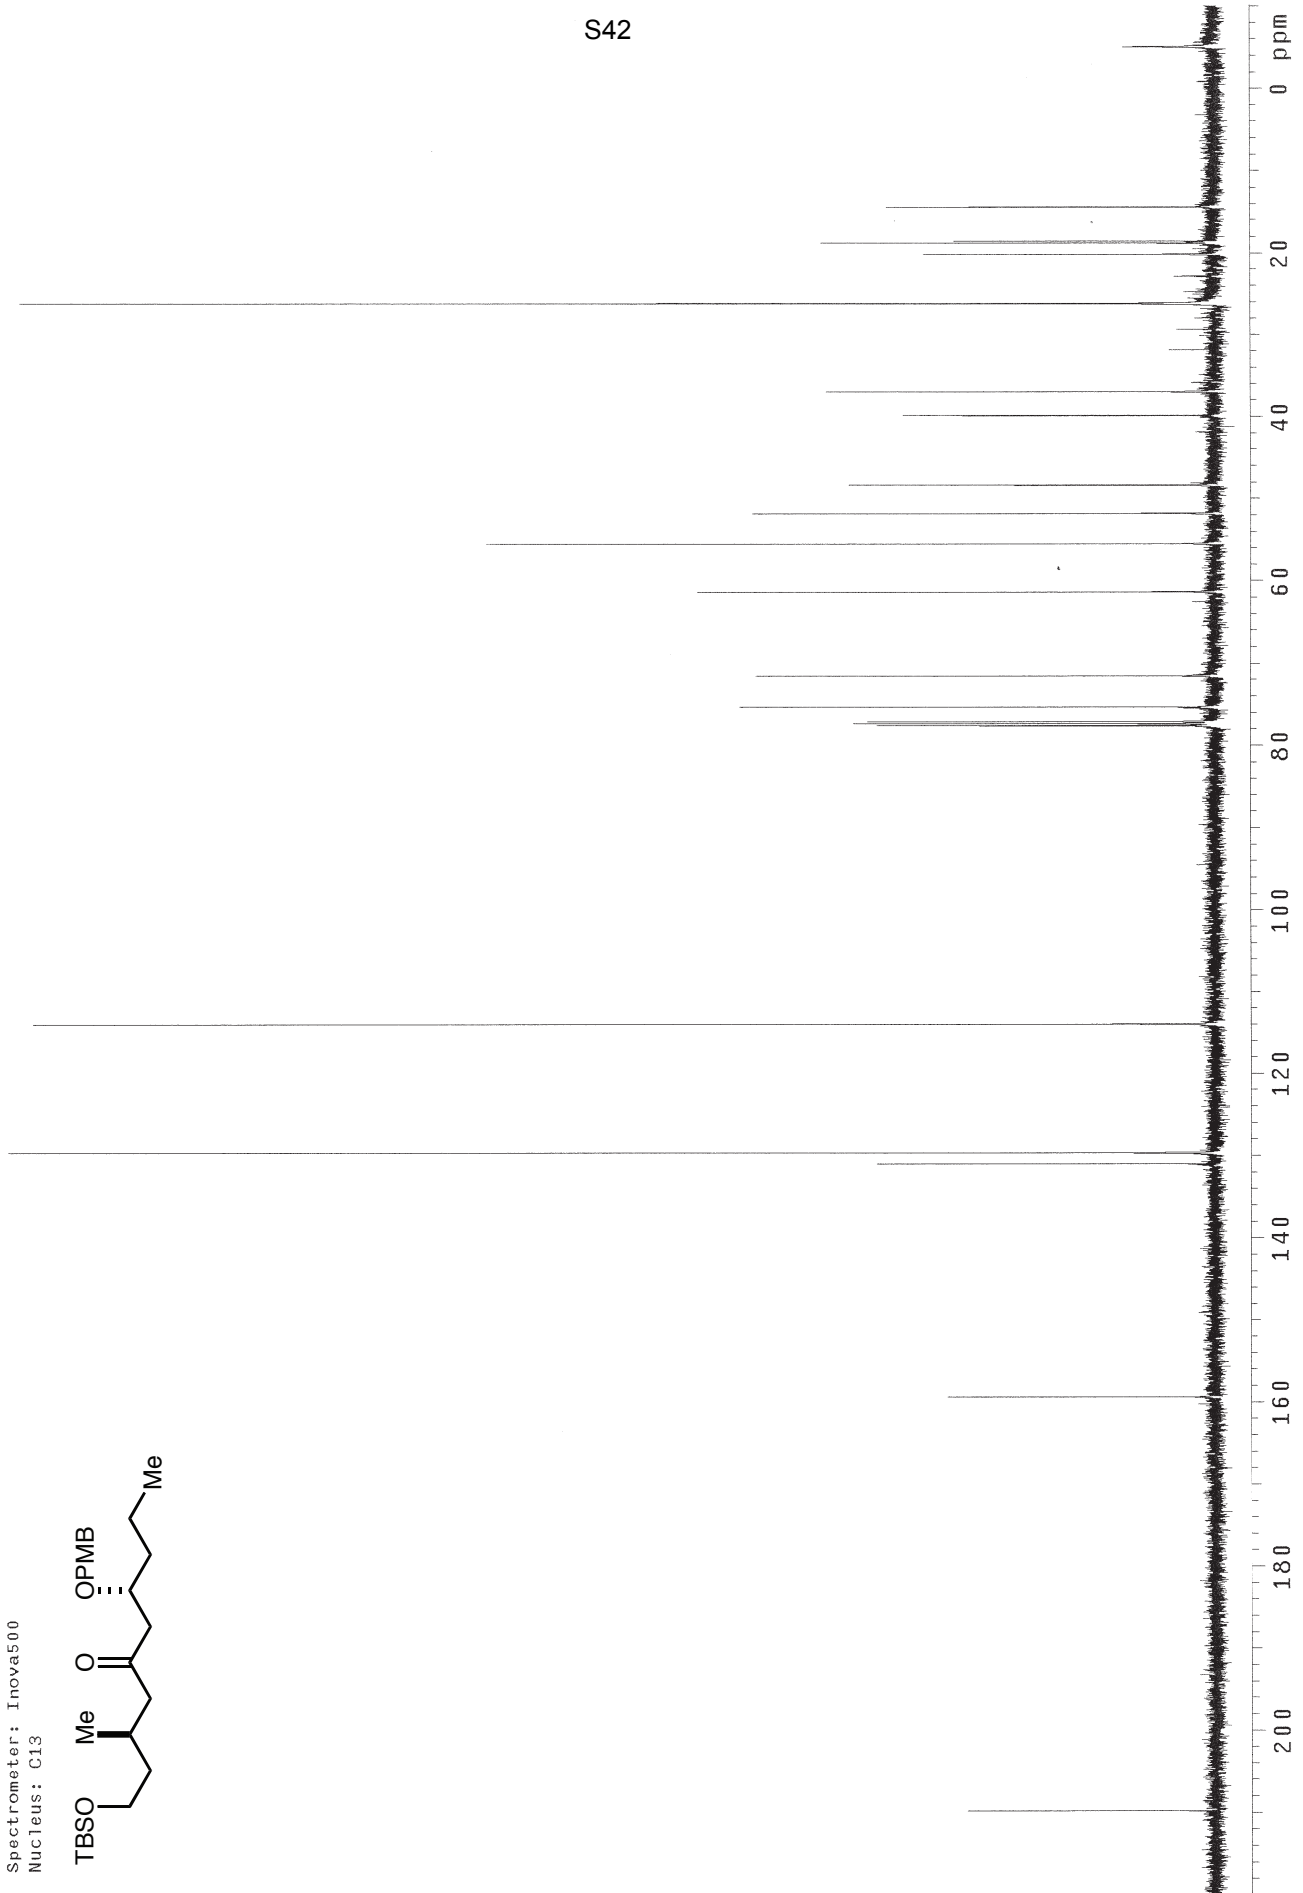

TZ:1-233  
INDEX 1  
FREQUENCY PPM -1510.020  
HEIGHT 0.0

Path: 00000005:51645:10 CST 2007  
Solvent: CDCl3  
File: 1  
Spectrometer: Inova500  
Nucleus: H1

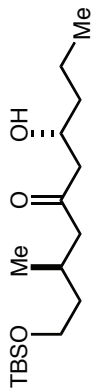

S43

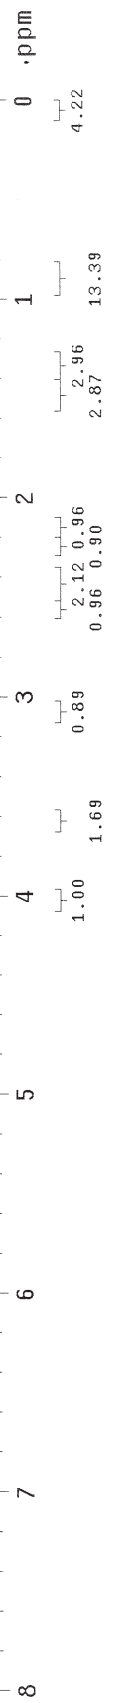

C13 std p-500 H/C probe RT  
 File: 1  
 Spectrometer: Inova500  
 Nucleus: C13  
 Index: 1  
 Frequency: -4917.728 PPM  
 Height: 0.0

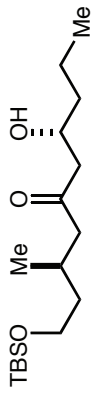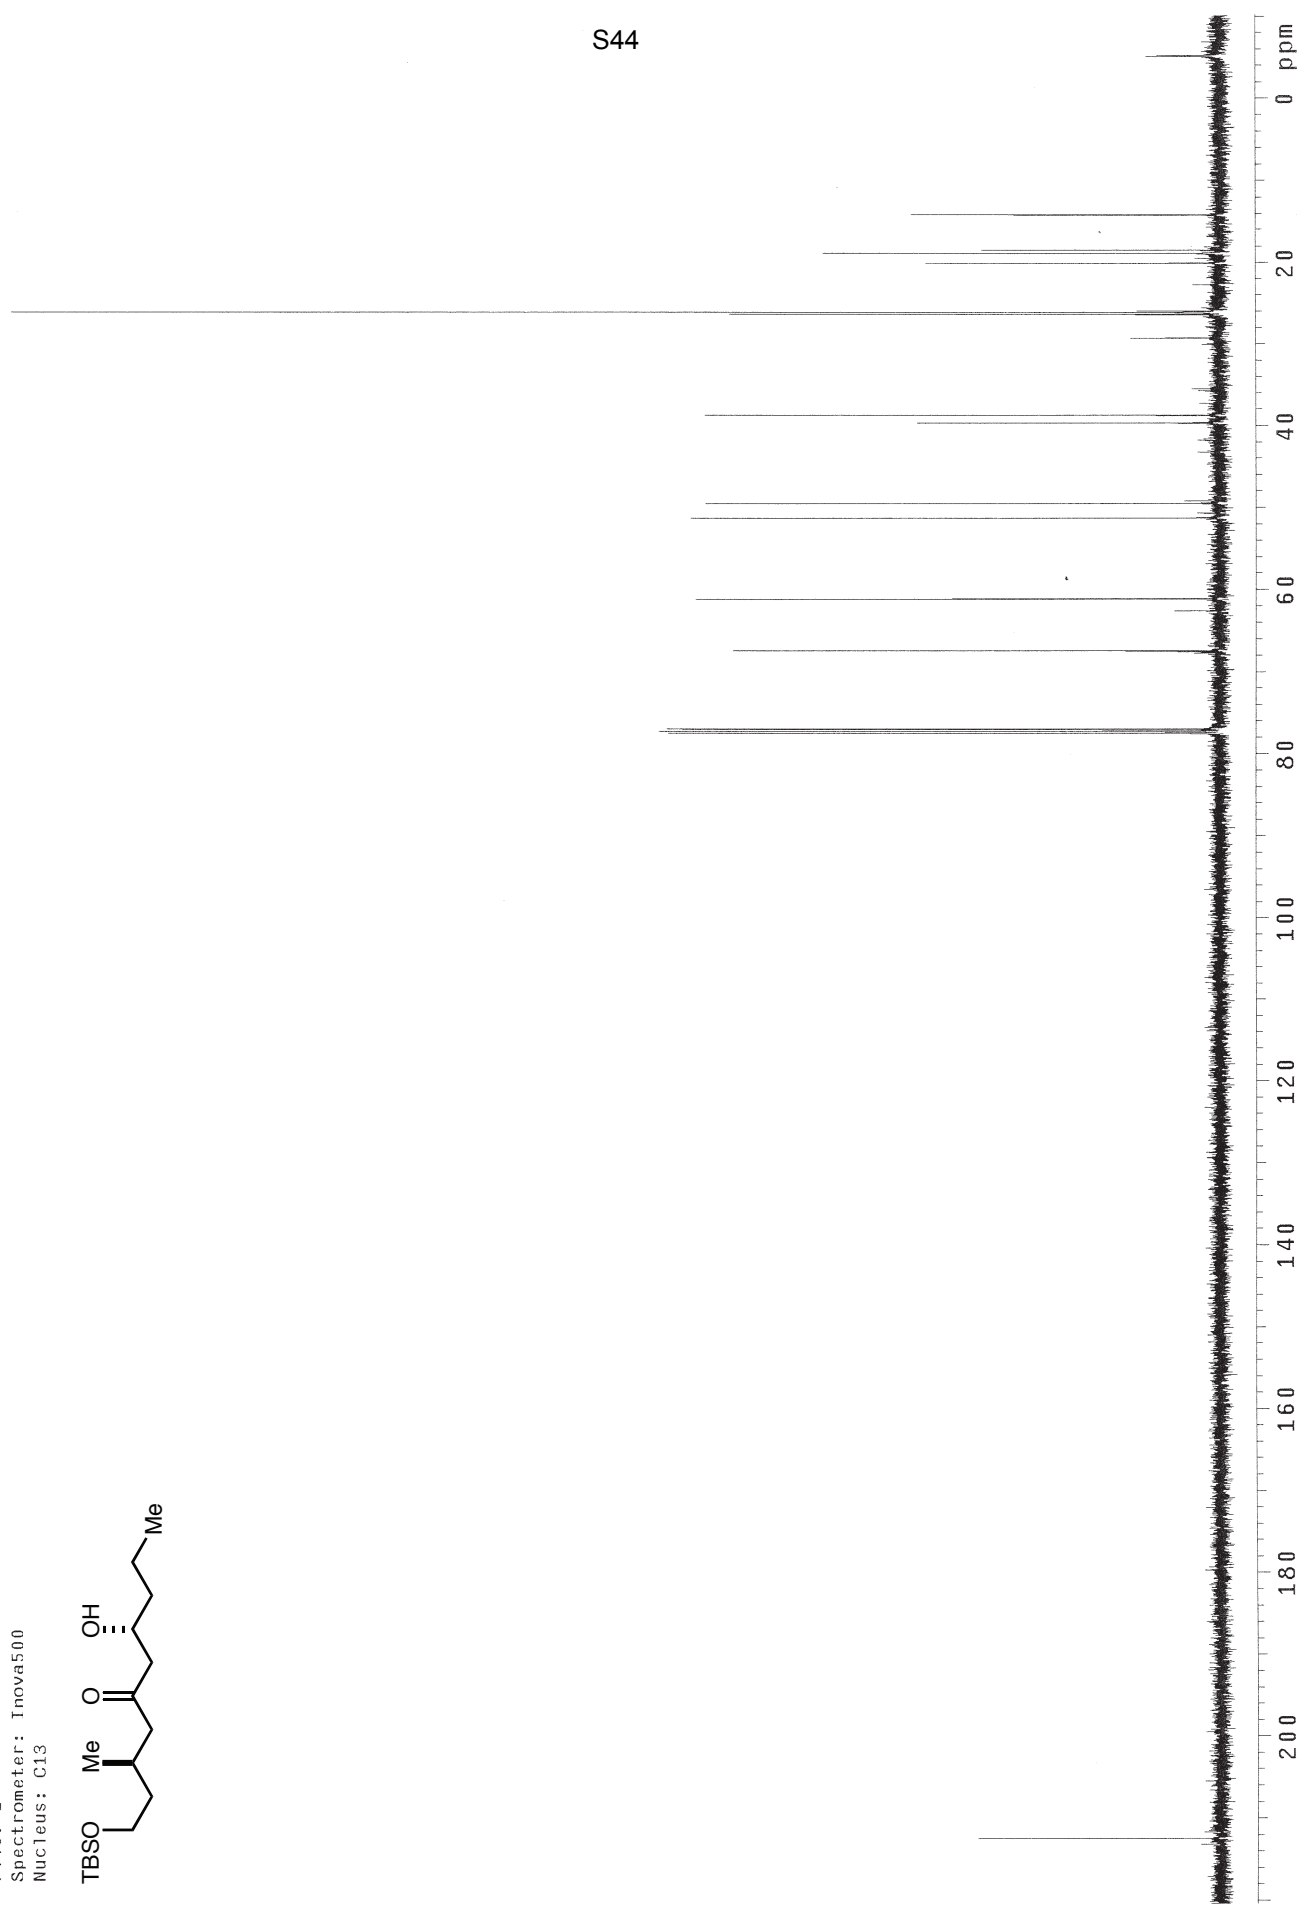

TZ: 1-234, f29-33  
INDEX 1  
FREQUENCY PPM -1510.020 -3.022  
HEIGHT 0.0

Path: 000000e:54167:29 CST 2007  
Solvent: CDCl3  
File: 1  
Spectrometer: Inova500  
Nucleus: H1

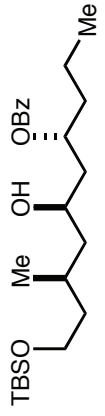

S45

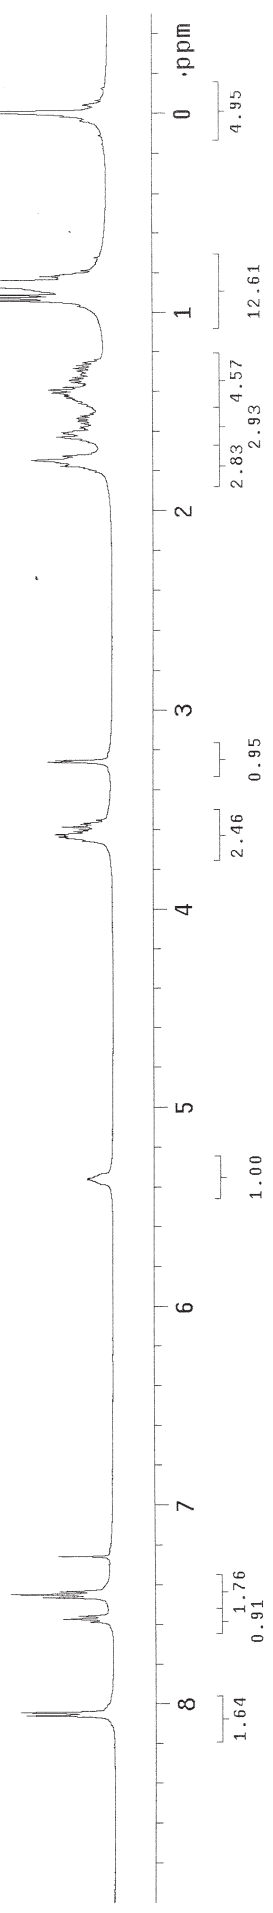

C13 std p-500 H/C probe RT  
Path: S:\Data\2007\08\22 CST 2007  
Solvent: CDCl3  
File: 1  
Spectrometer: Inova500  
Nucleus: C13

INDEX 1  
FREQUENCY PPM -4911.401  
HEIGHT 0.0

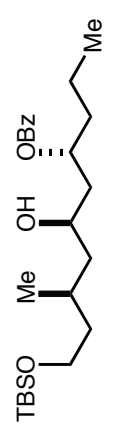

S46

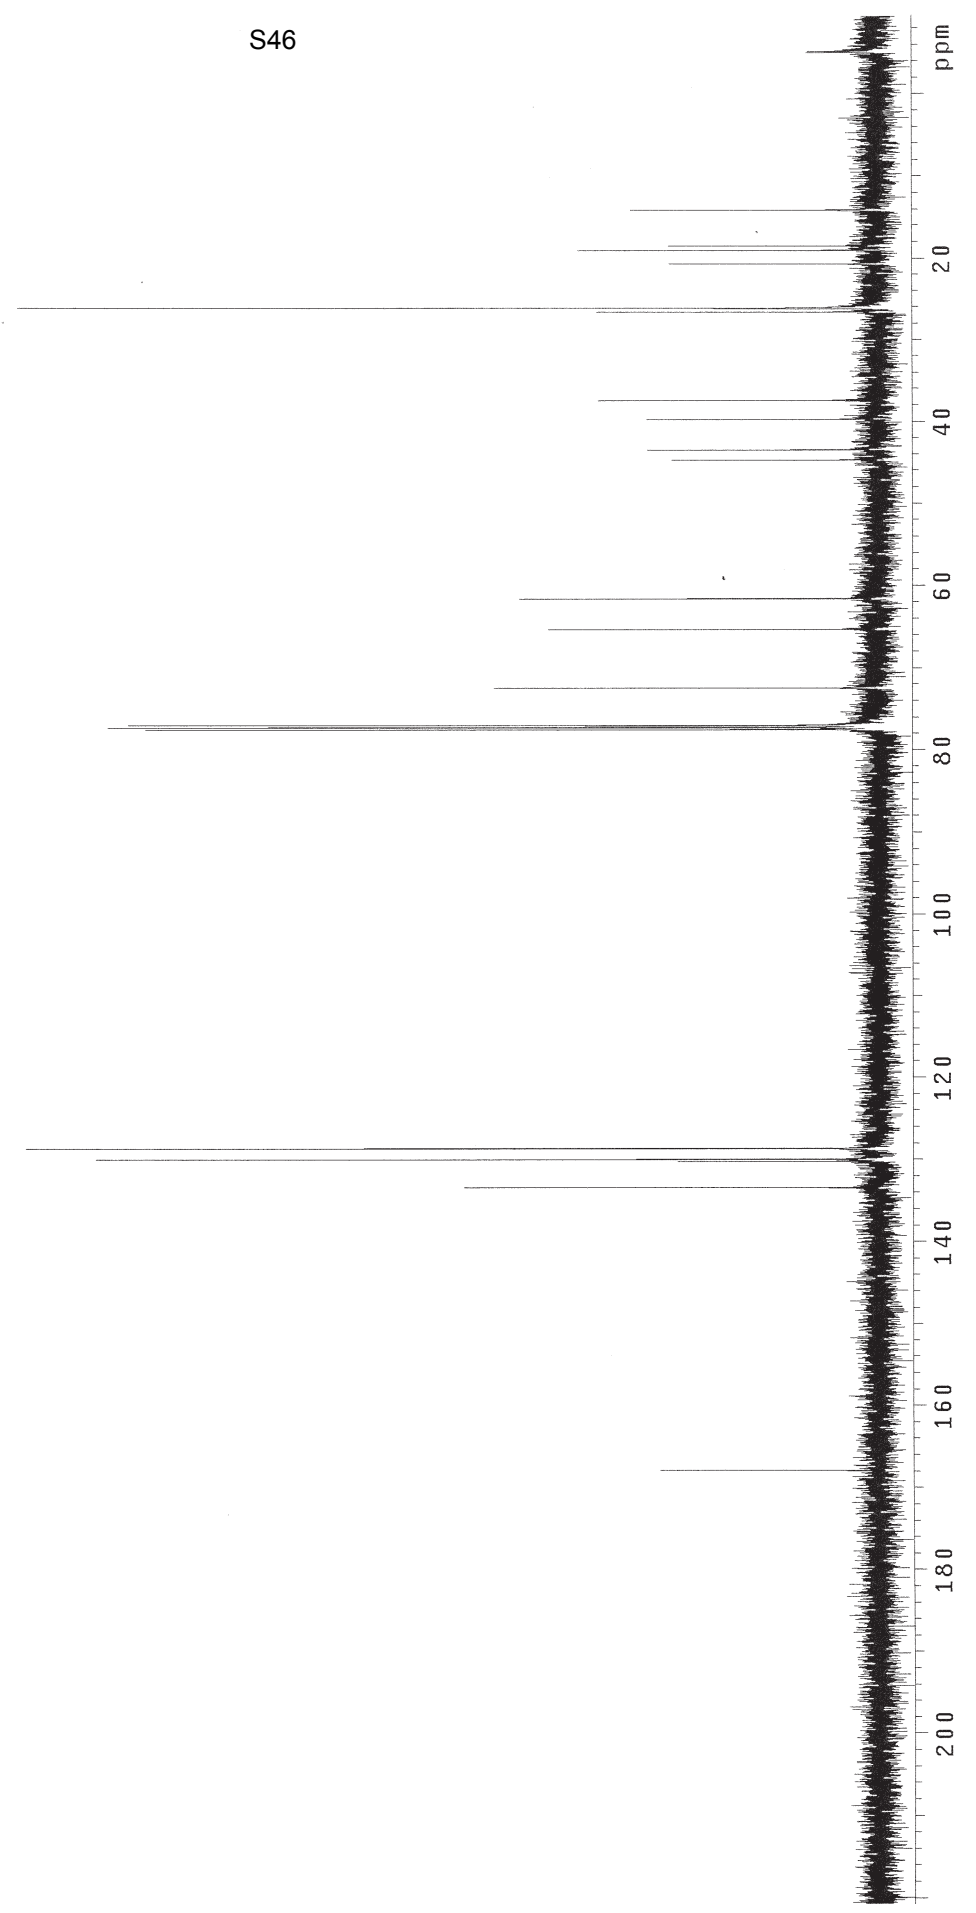

TZ:1-235 INDEX 1 FREQUENCY PPM HEIGHT 0.0

File: 1  
 Spectrometer: Inova500  
 Nucleus: H1

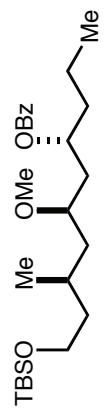

S47

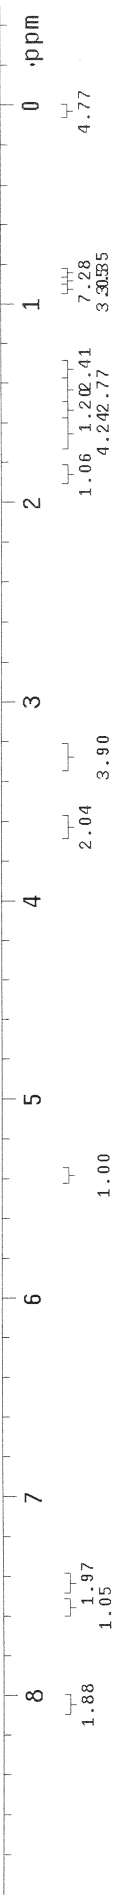

TZ:1-235  
 Path: \\F:\Users\jg\5s2\13:24 CST 2007  
 Solvent: CDCl3  
 File: 1  
 Spectrometer: Inova500  
 Nucleus: C13

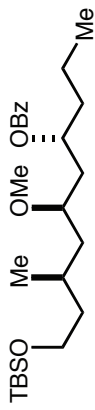

| INDEX | FREQUENCY PPM | HEIGHT  |
|-------|---------------|---------|
| 1     | -4916.128     | -39.122 |
|       |               | 0.0     |

S48

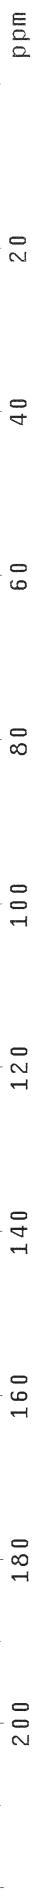



C13 std p-500 H/C probe RT INDEX FREQUENCY PPM HEIGHT  
-4911.401 -39.085 0.0  
File: 1  
Spectrometer: Inova500  
Nucleus: C13

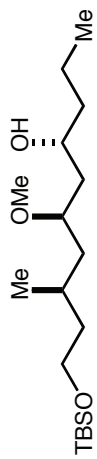

S49

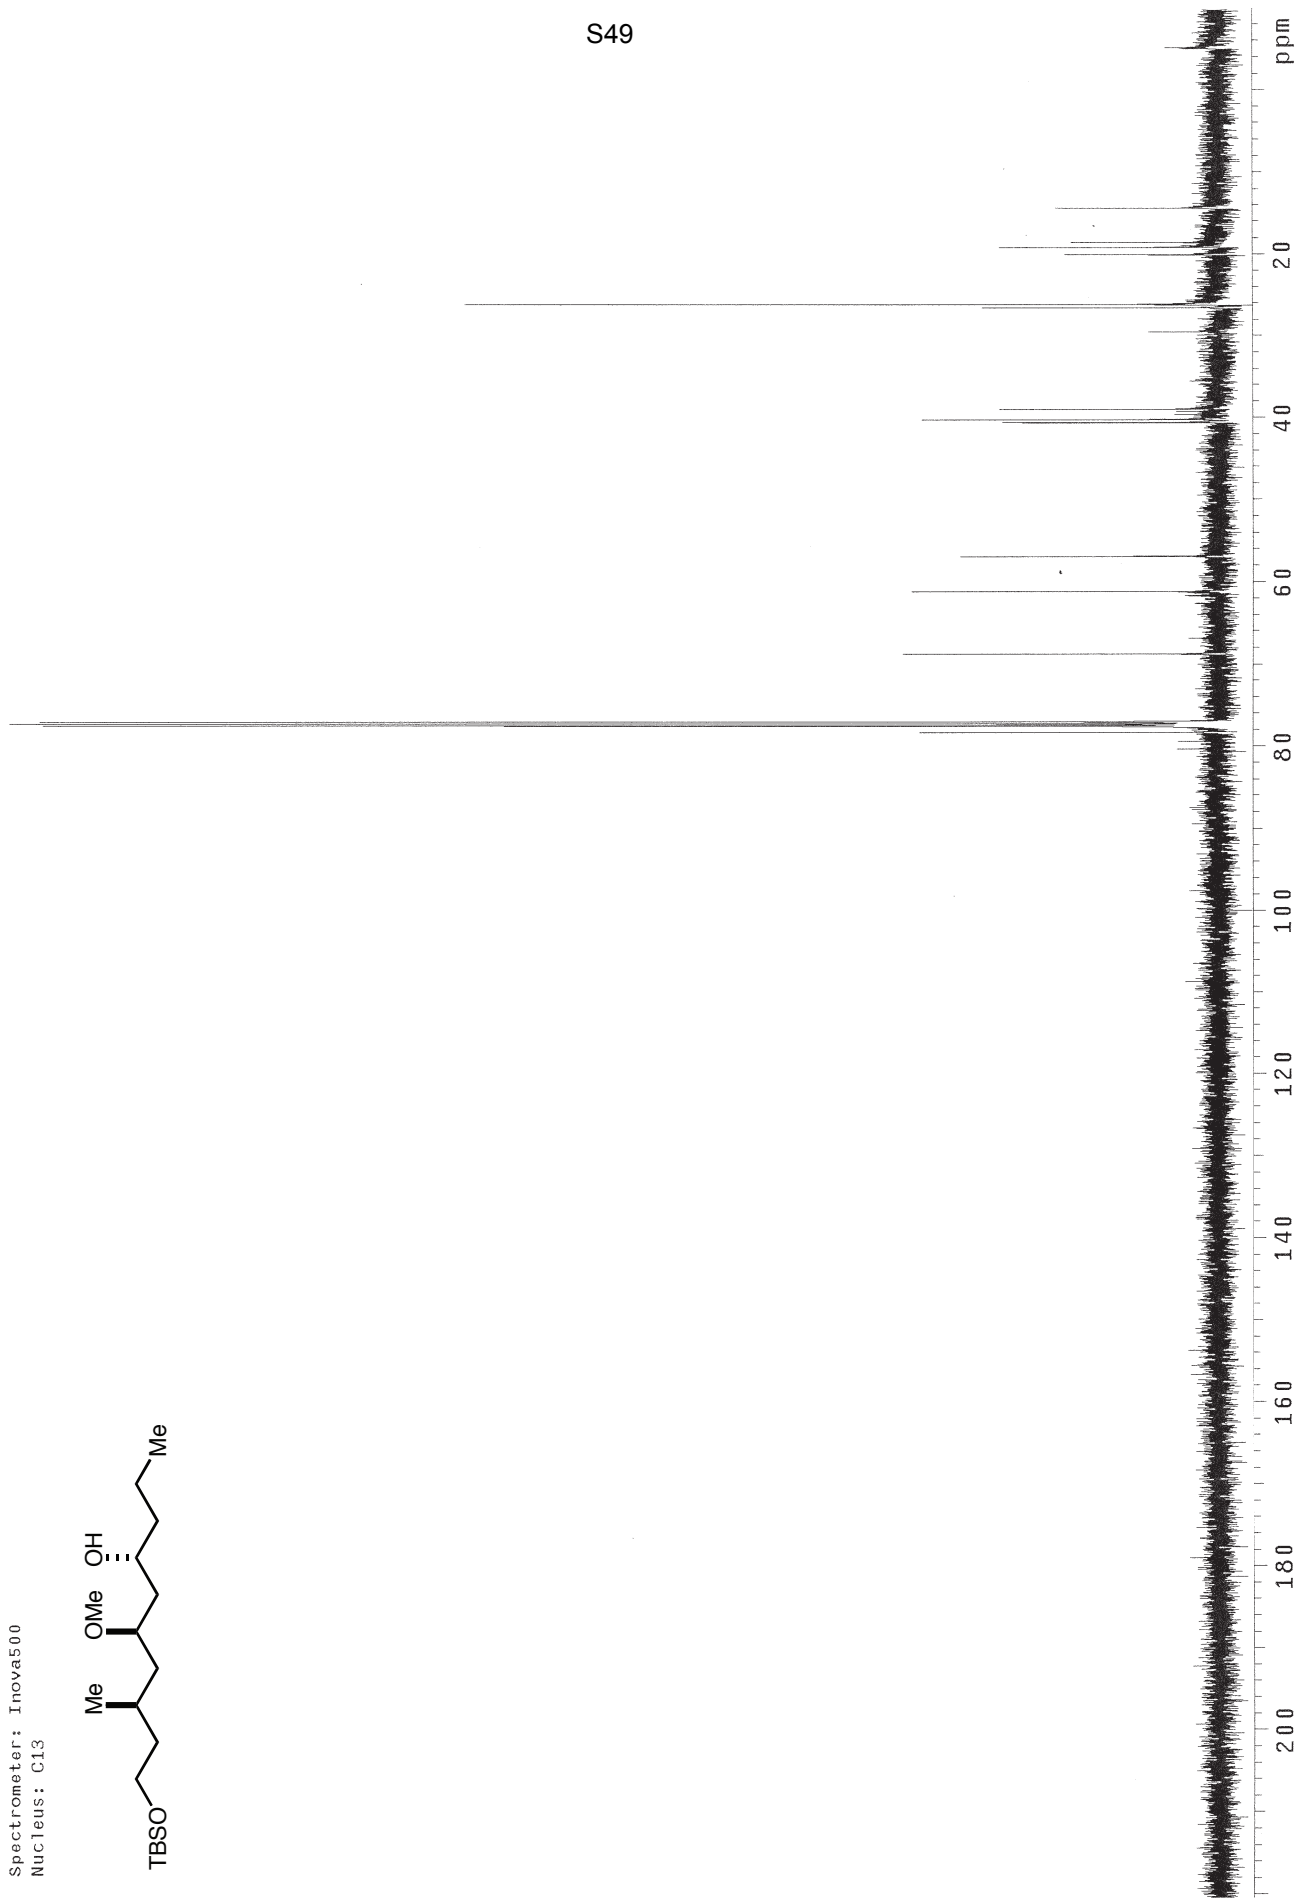

H1\_std P-inova500 H/C probe RT INDEX FREQUENCY PPM HEIGHT  
1 -1501.212 -3.004 0.0

File: T2:1-239  
Spectrometer: Inova500  
Nucleus: H1

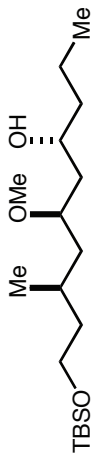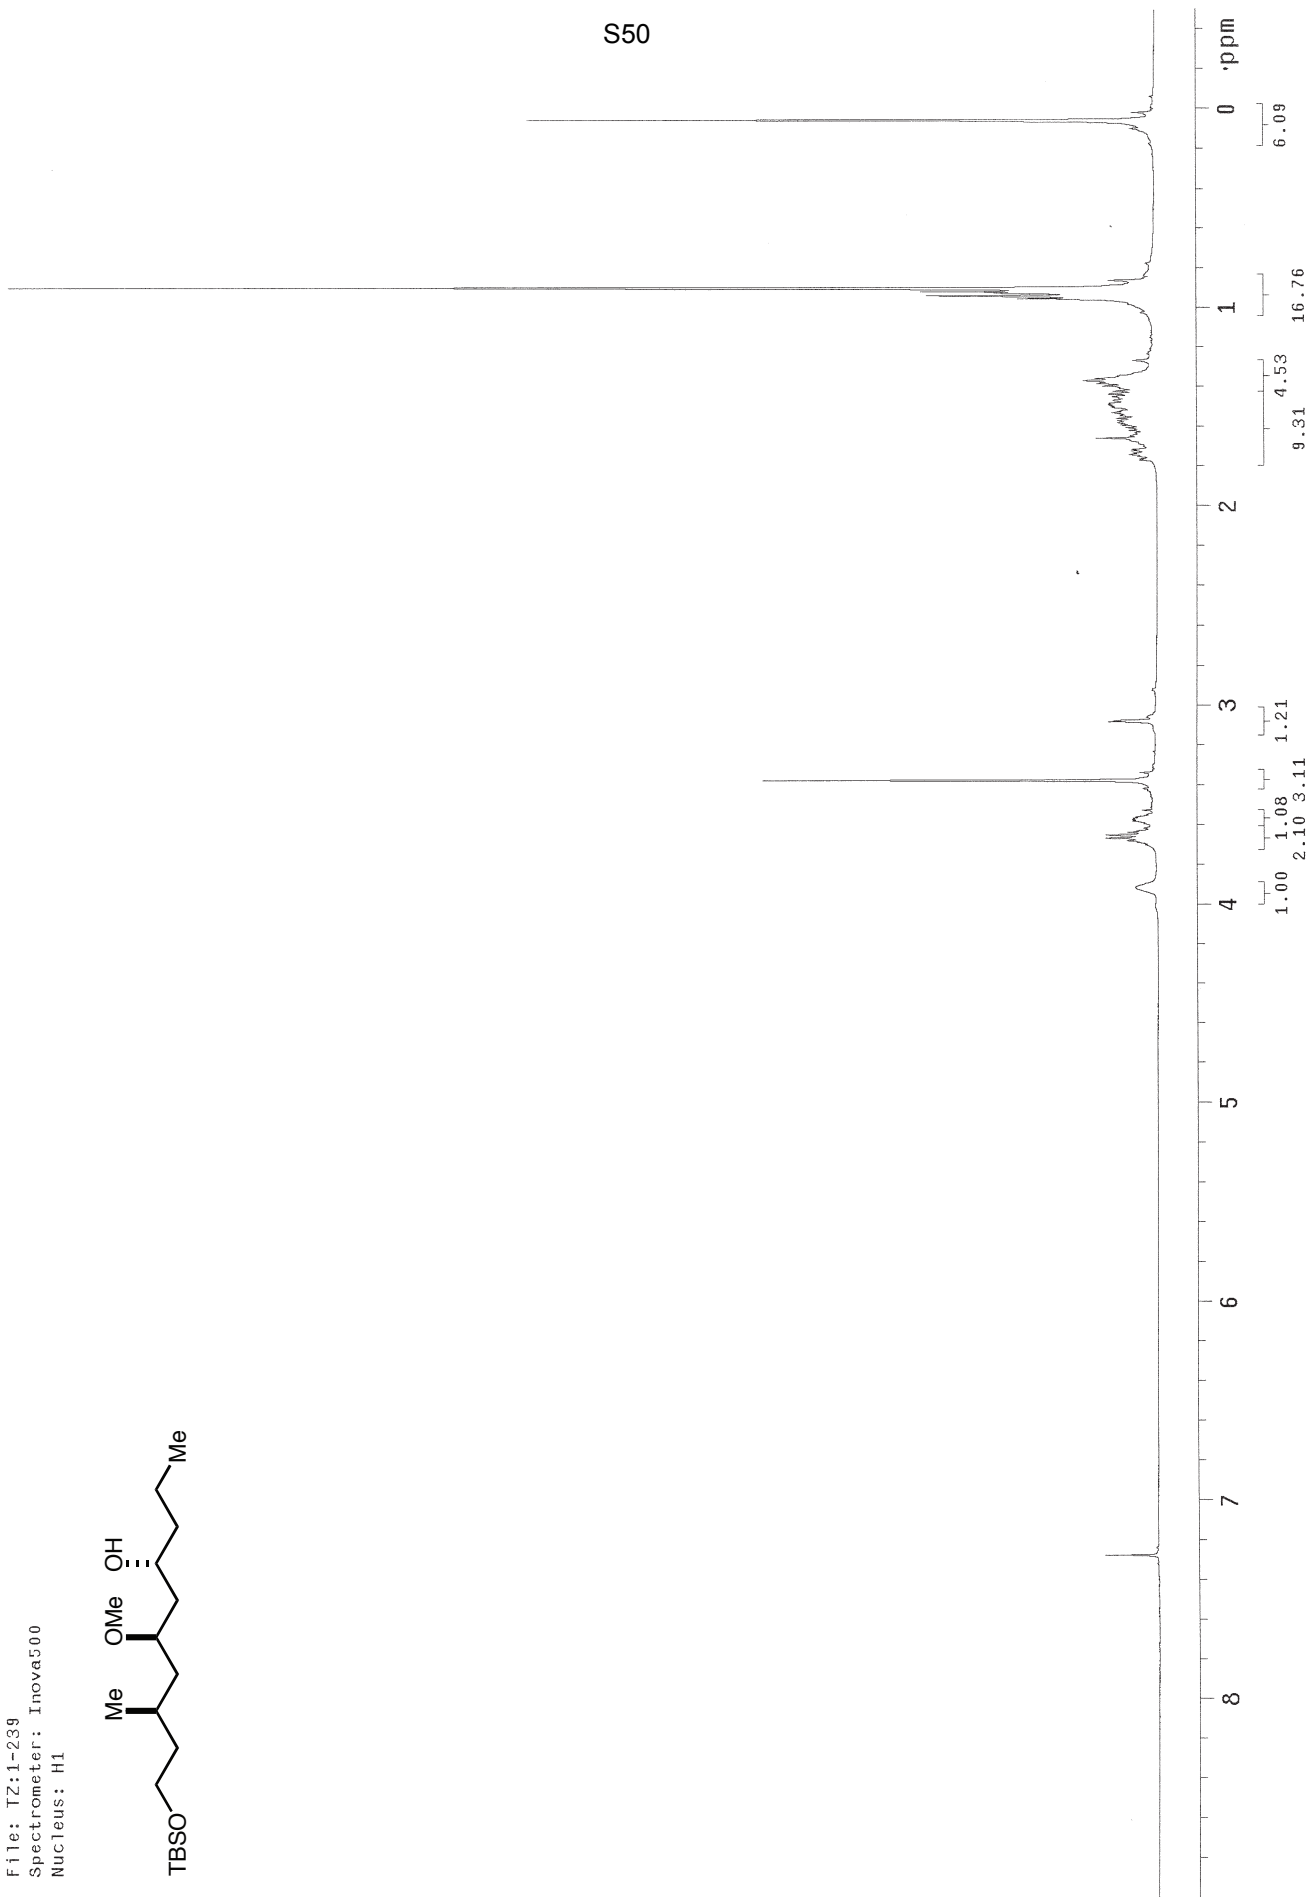

H1\_std P-inova500 H/C probe RT INDEX FREQUENCY PPM HEIGHT

1 -1501.212 -3.004 0.0

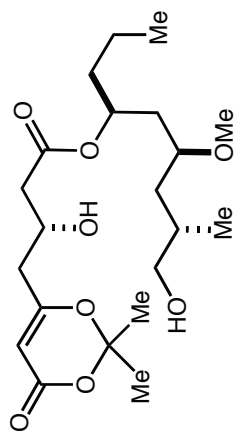

S51

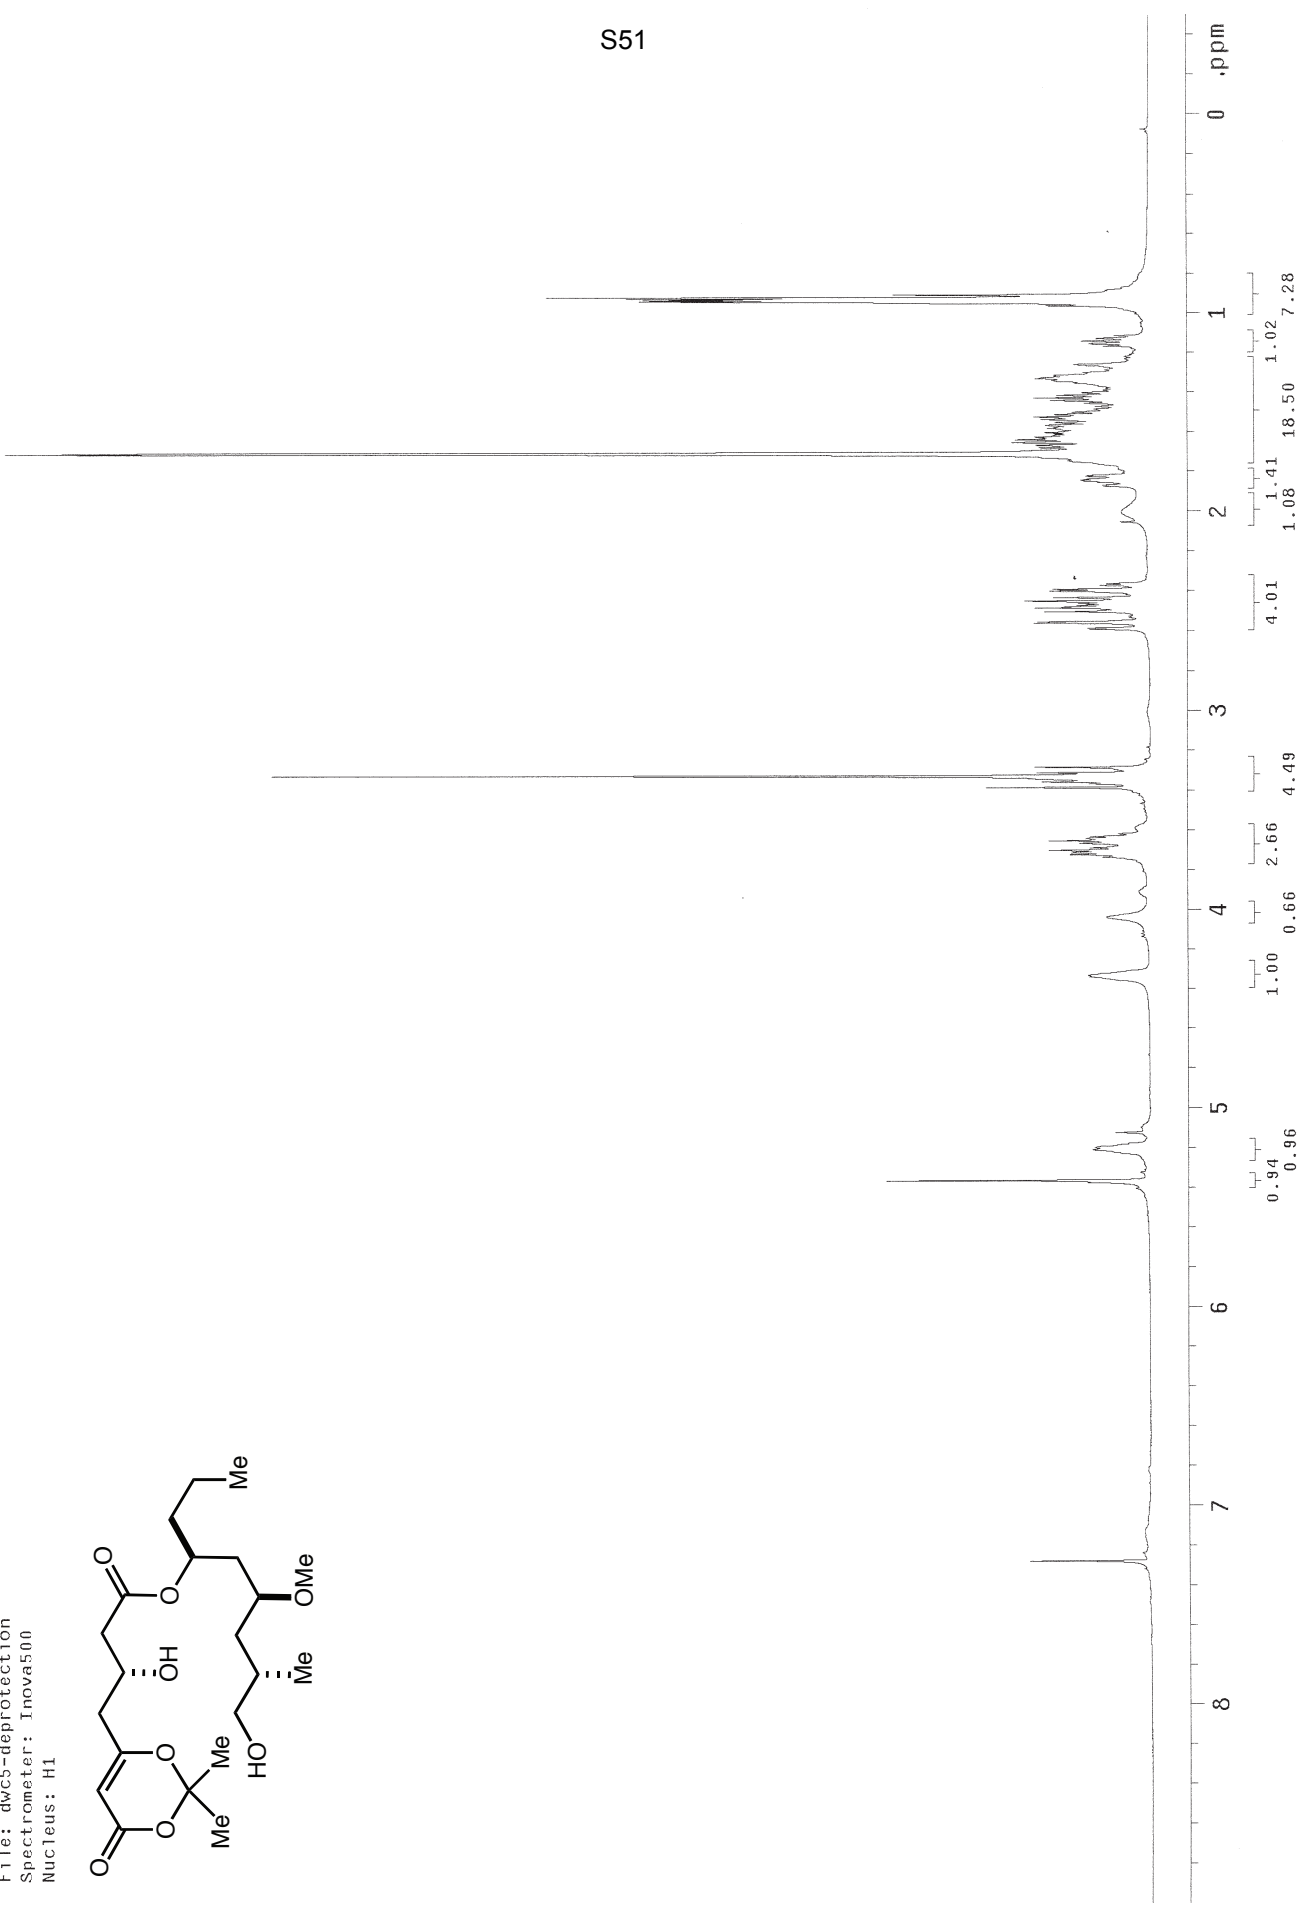

C13 std p-500 H/C probe RT  
 Path: \\01010666\6666\6666\15:46 CST 2007  
 Solvent: CDCl3  
 File: dwc5-deprotectionC  
 Spectrometer: Inova500  
 Nucleus: C13

| INDEX | FREQUENCY | PPM    | HEIGHT |
|-------|-----------|--------|--------|
| 1     | 9743.659  | 77.539 | 247.8  |
| 2     | 9711.661  | 77.285 | 255.2  |
| 3     | 9679.663  | 77.030 | 249.2  |

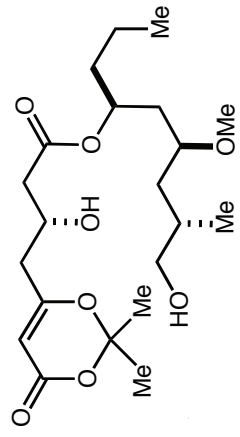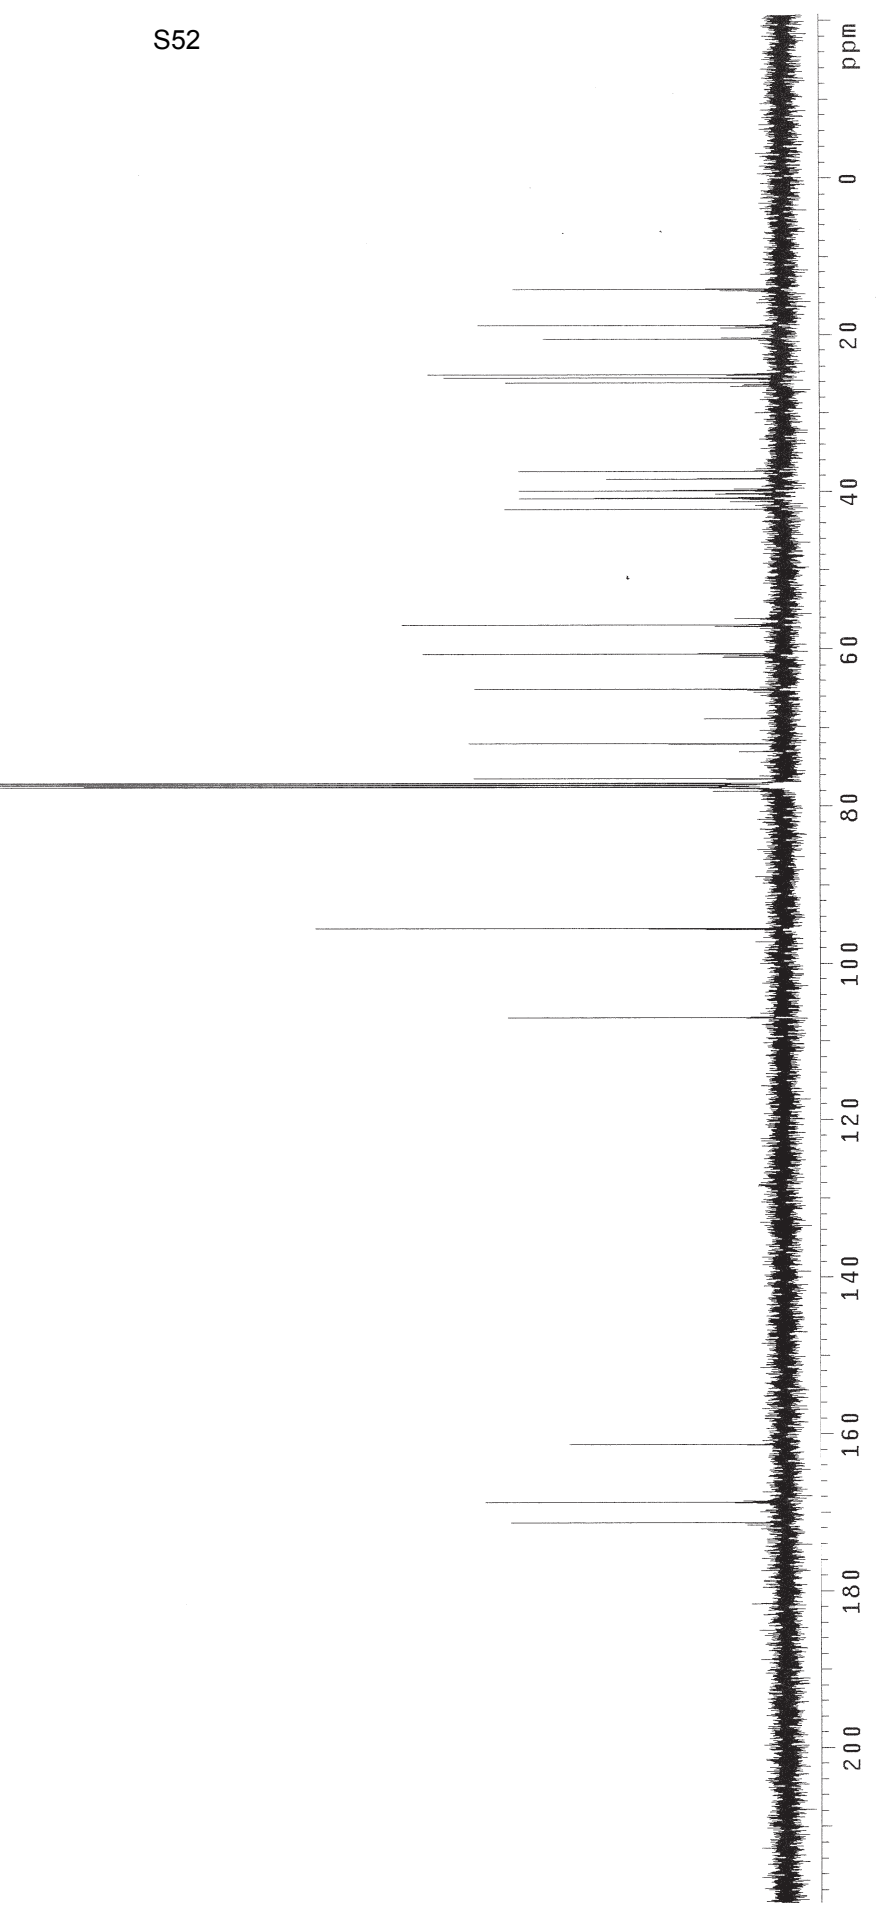

H1\_std P-inova500 H/C probe RT INDEX FREQUENCY PPM HEIGHT

Path: S:\Users\20217416:35 CDT 2007  
Solvent: CDCl3

Spectrometer: Inova500  
Nucleus: H1

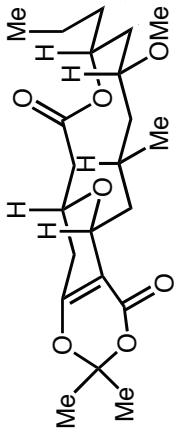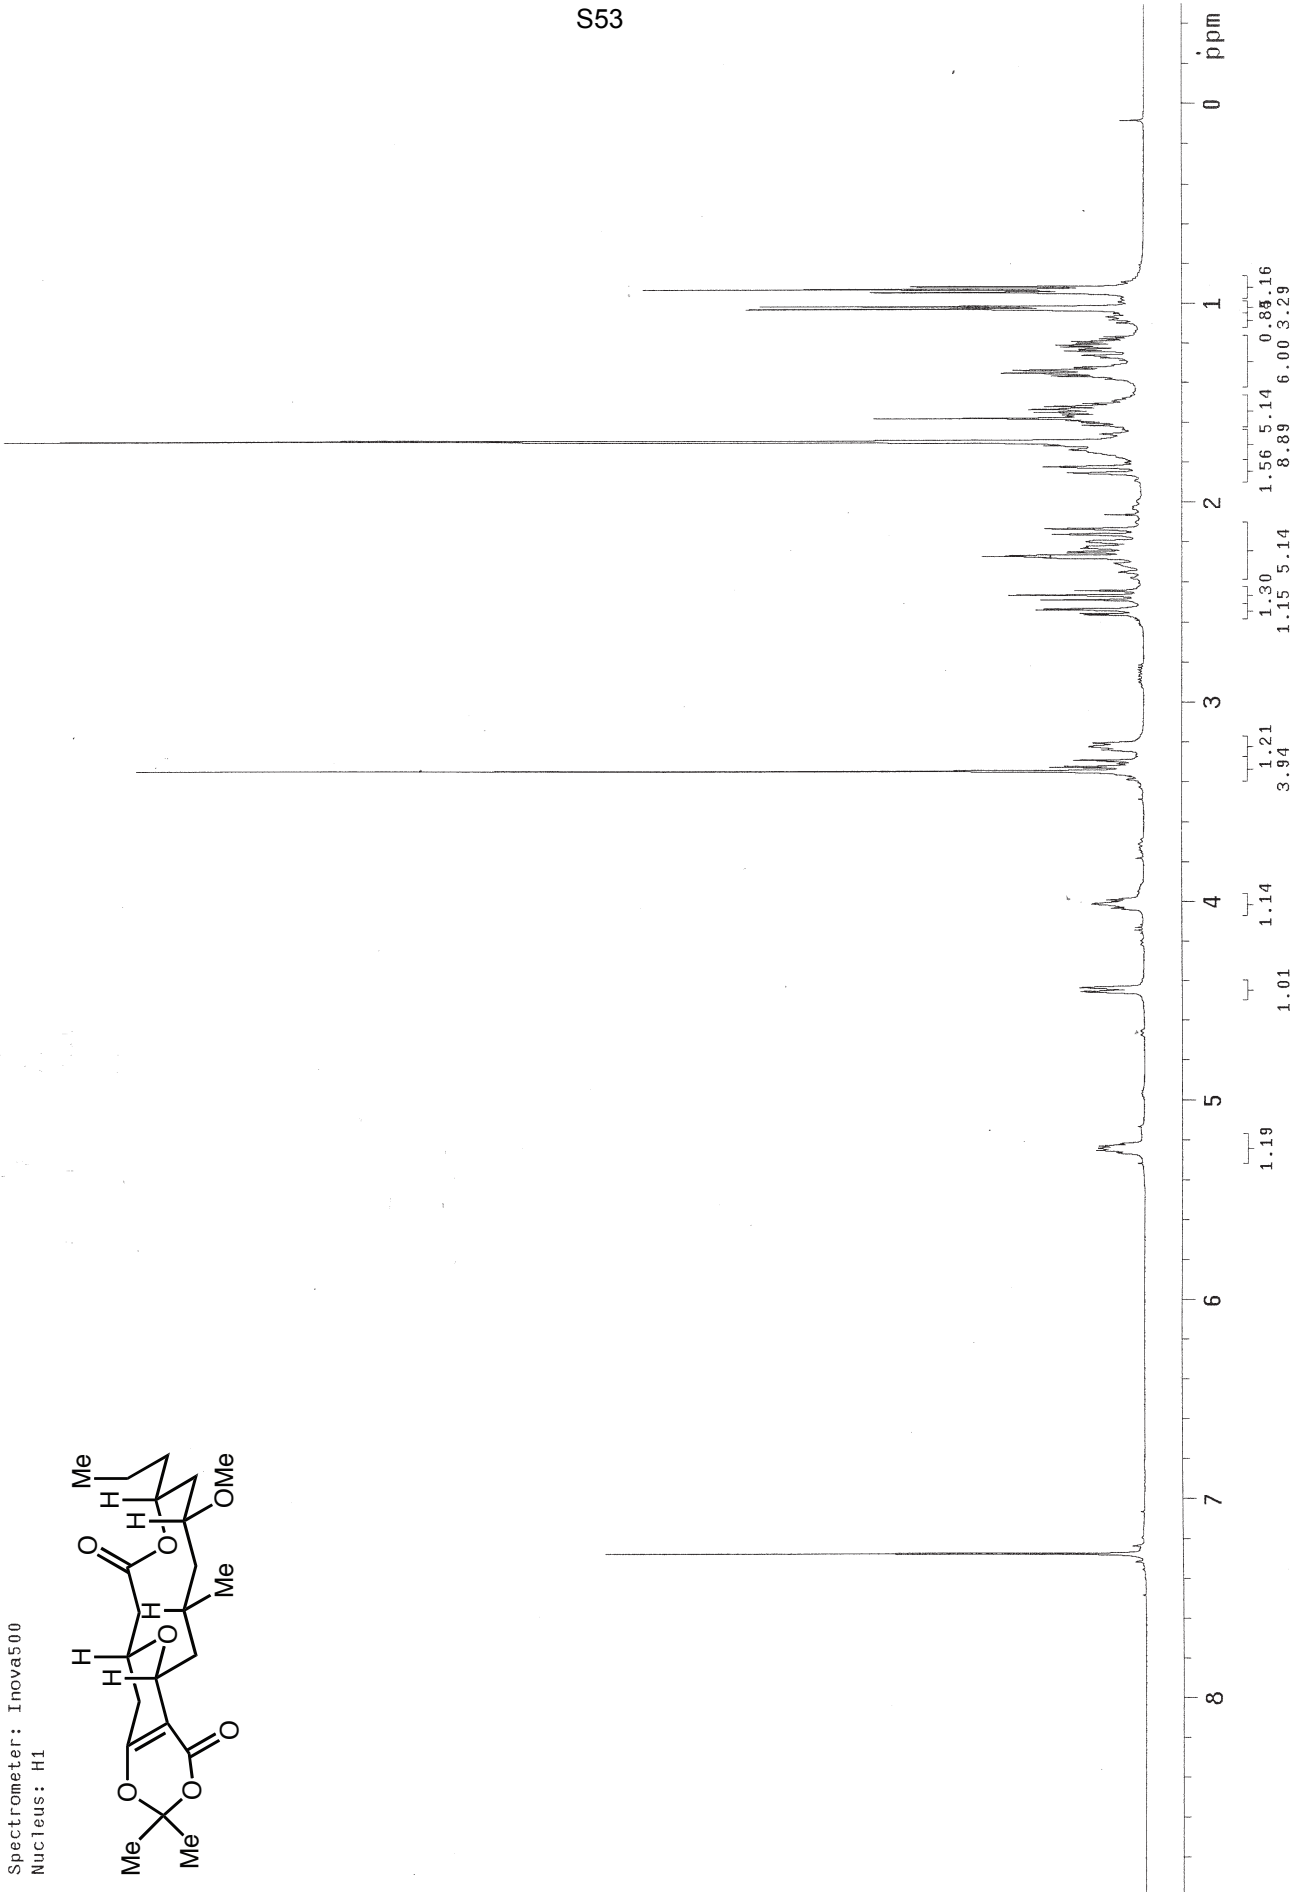

C13 std p-500 H/C probe RT

Path: 311080020s37:59 CDT 2007

Solvent: CDCl3

Spectrometer: Inova500

Nucleus: C13

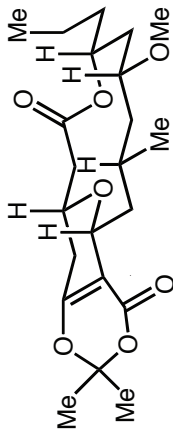

| INDEX | FREQUENCY | PPM     | HEIGHT |
|-------|-----------|---------|--------|
| 1     | 21576.501 | 171.704 | 49.6   |
| 2     | 20391.510 | 162.274 | 44.0   |
| 3     | 20048.599 | 159.545 | 48.6   |
| 4     | 13325.830 | 106.046 | 63.1   |
| 5     | 13308.764 | 105.910 | 49.9   |
| 6     | 12563.212 | 99.977  | -24.1  |
| 7     | 10369.219 | 82.517  | 83.8   |
| 8     | 9740.459  | 77.514  | 802.6  |
| 9     | 9708.461  | 77.259  | 817.3  |
| 10    | 9676.997  | 77.009  | 822.4  |
| 11    | 9551.138  | 76.007  | 74.1   |
| 12    | 9442.345  | 75.141  | 73.6   |
| 13    | 8926.645  | 71.037  | 67.2   |
| 14    | 7159.292  | 56.973  | 86.0   |
| 15    | 5648.988  | 44.954  | 48.6   |
| 16    | 5342.341  | 42.514  | 37.6   |
| 17    | 5276.746  | 41.992  | 49.0   |
| 18    | 5097.557  | 40.566  | 42.9   |
| 19    | 4767.445  | 37.939  | 63.0   |
| 20    | 4228.813  | 33.653  | 64.2   |
| 21    | 4184.549  | 33.300  | 56.3   |
| 22    | 3489.660  | 27.770  | 64.6   |
| 23    | 3186.746  | 25.360  | 42.1   |
| 24    | 2781.439  | 22.134  | 73.2   |
| 25    | 2361.199  | 18.790  | 65.8   |
| 26    | 1780.436  | 14.169  | 60.3   |

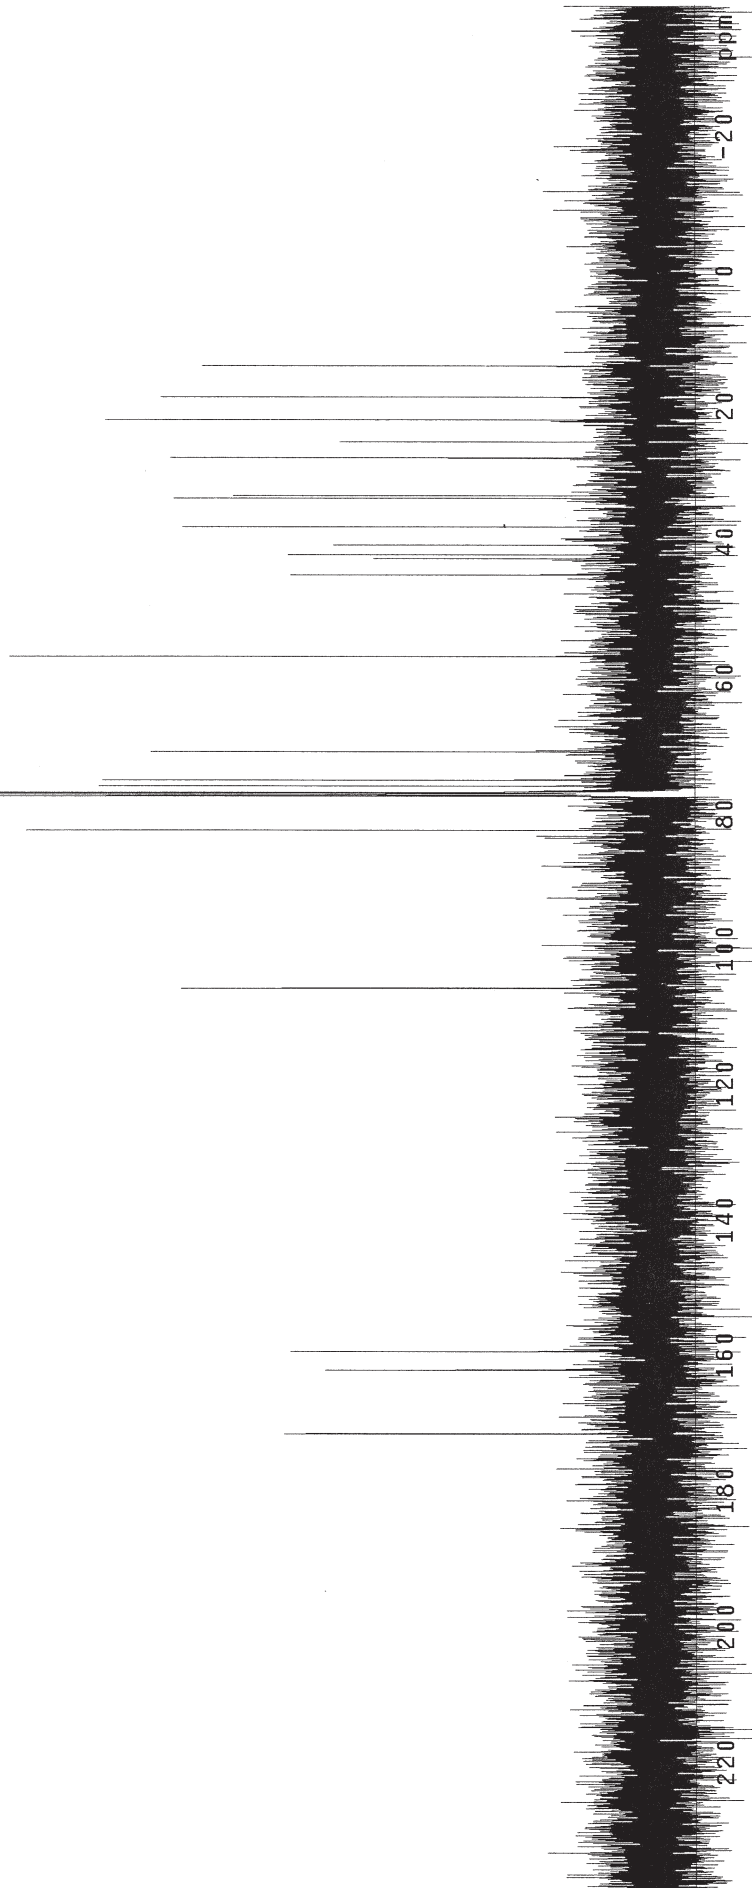

H1\_std P-inova500 H/C probe RT INDEX FREQUENCY PPM HEIGHT

0.0

1 -1501.212 -3.004

0.0

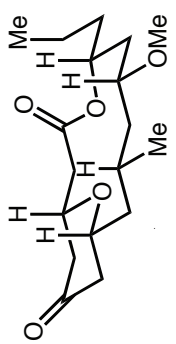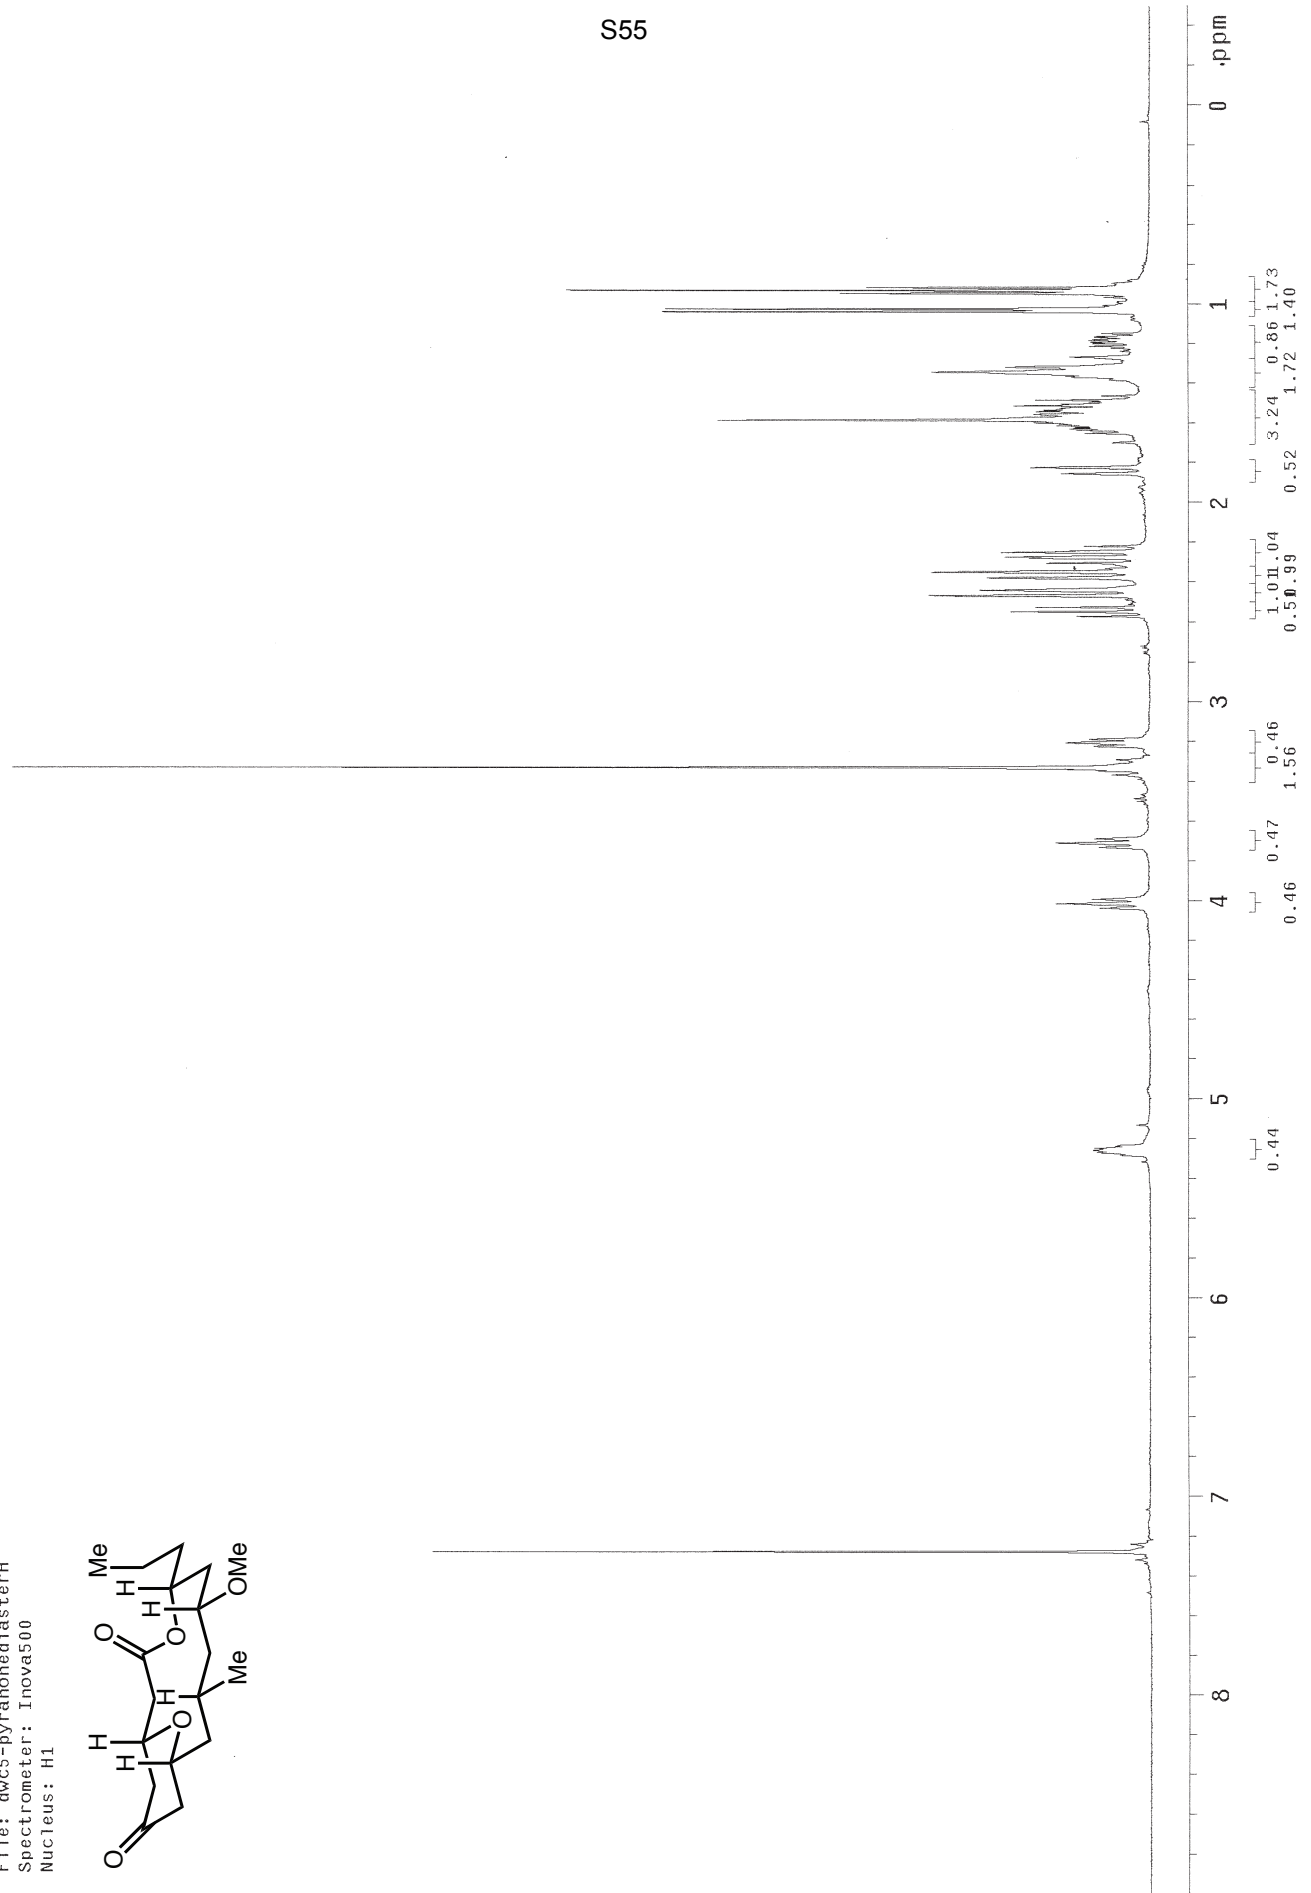

S55

| INDEX | FREQUENCY | PPM    | HEIGHT |
|-------|-----------|--------|--------|
| 1     | 9740.993  | 77.518 | 379.1  |
| 2     | 9708.995  | 77.263 | 386.7  |
| 3     | 9676.997  | 77.009 | 377.5  |

C13 std p-500 H/C probe RT  
 Date: 20070622 11:11 CST 2007  
 File: dwc5-pyranonediastC  
 Solvent: CDCl3  
 Spectrometer: Inova500  
 Nucleus: C13

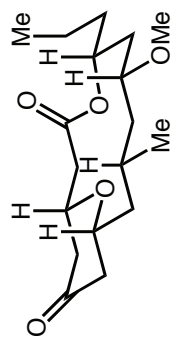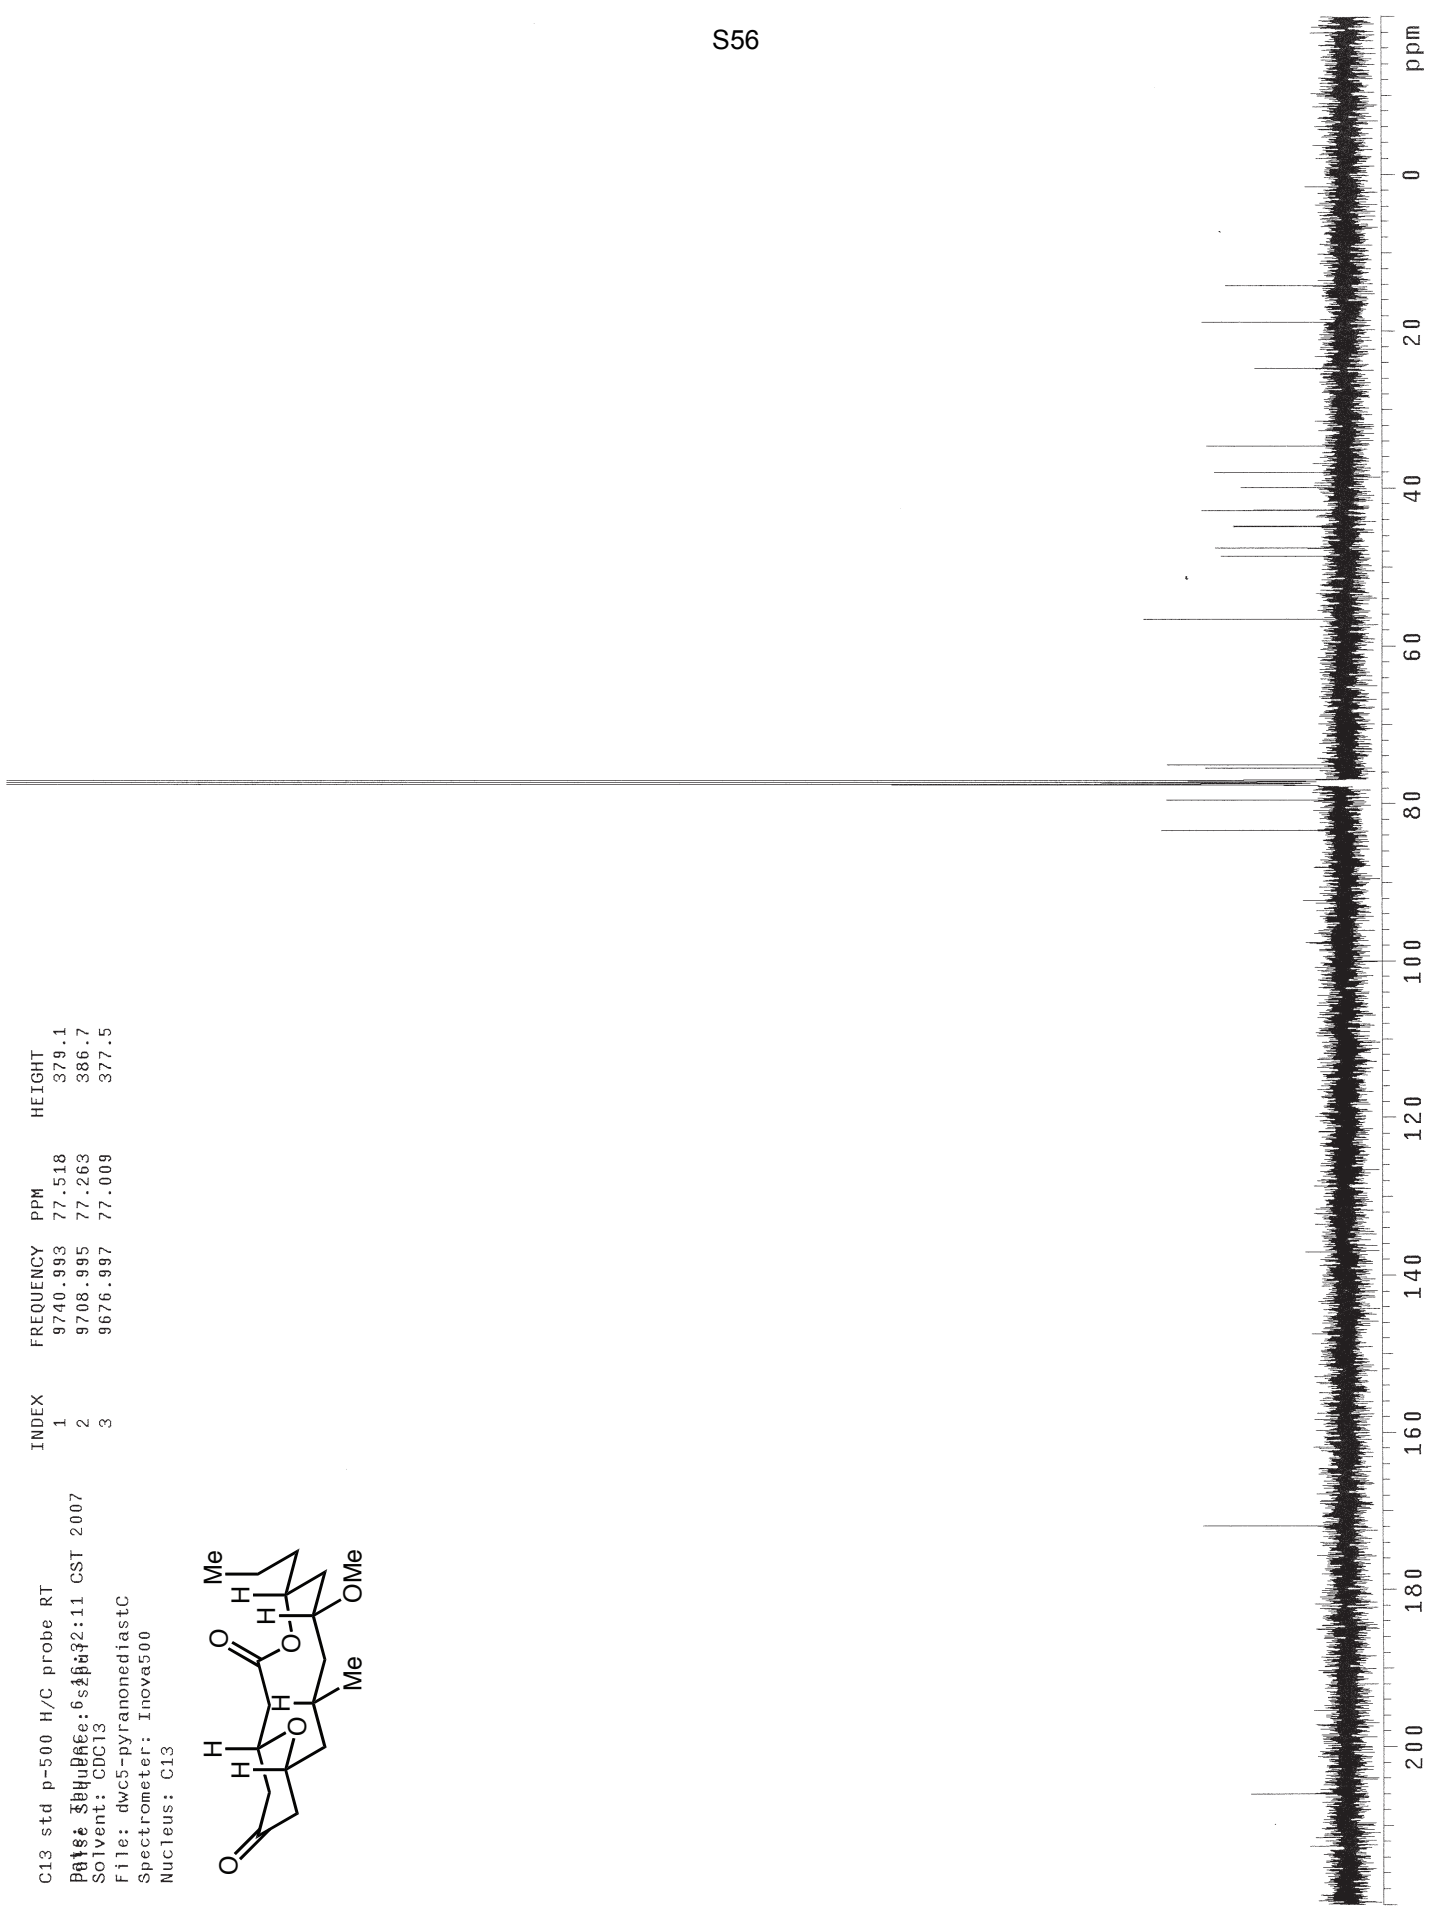



H1 stdpar RT idpfg\_5mm inova500  
 Path: S:\R08\Be23\5448:03 CDT 2007  
 Solvent: CDCl3

Spectrometer: Inova500  
 Nucleus: H1

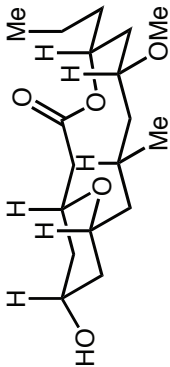

| INDEX | FREQUENCY | PPM   | HEIGHT |
|-------|-----------|-------|--------|
| 1     | 3640.207  | 7.289 | 56.8   |
| 2     | 1664.877  | 3.334 | 151.2  |
| 3     | 1062.194  | 2.127 | 45.1   |
| 4     | 769.363   | 1.541 | 36.9   |
| 5     | 650.766   | 1.303 | 38.0   |
| 6     | 637.955   | 1.277 | 40.9   |
| 7     | 508.743   | 1.019 | 84.7   |
| 8     | 502.154   | 1.006 | 87.7   |
| 9     | 473.054   | 0.947 | 57.6   |
| 10    | 465.916   | 0.933 | 93.2   |
| 11    | 458.596   | 0.918 | 50.2   |

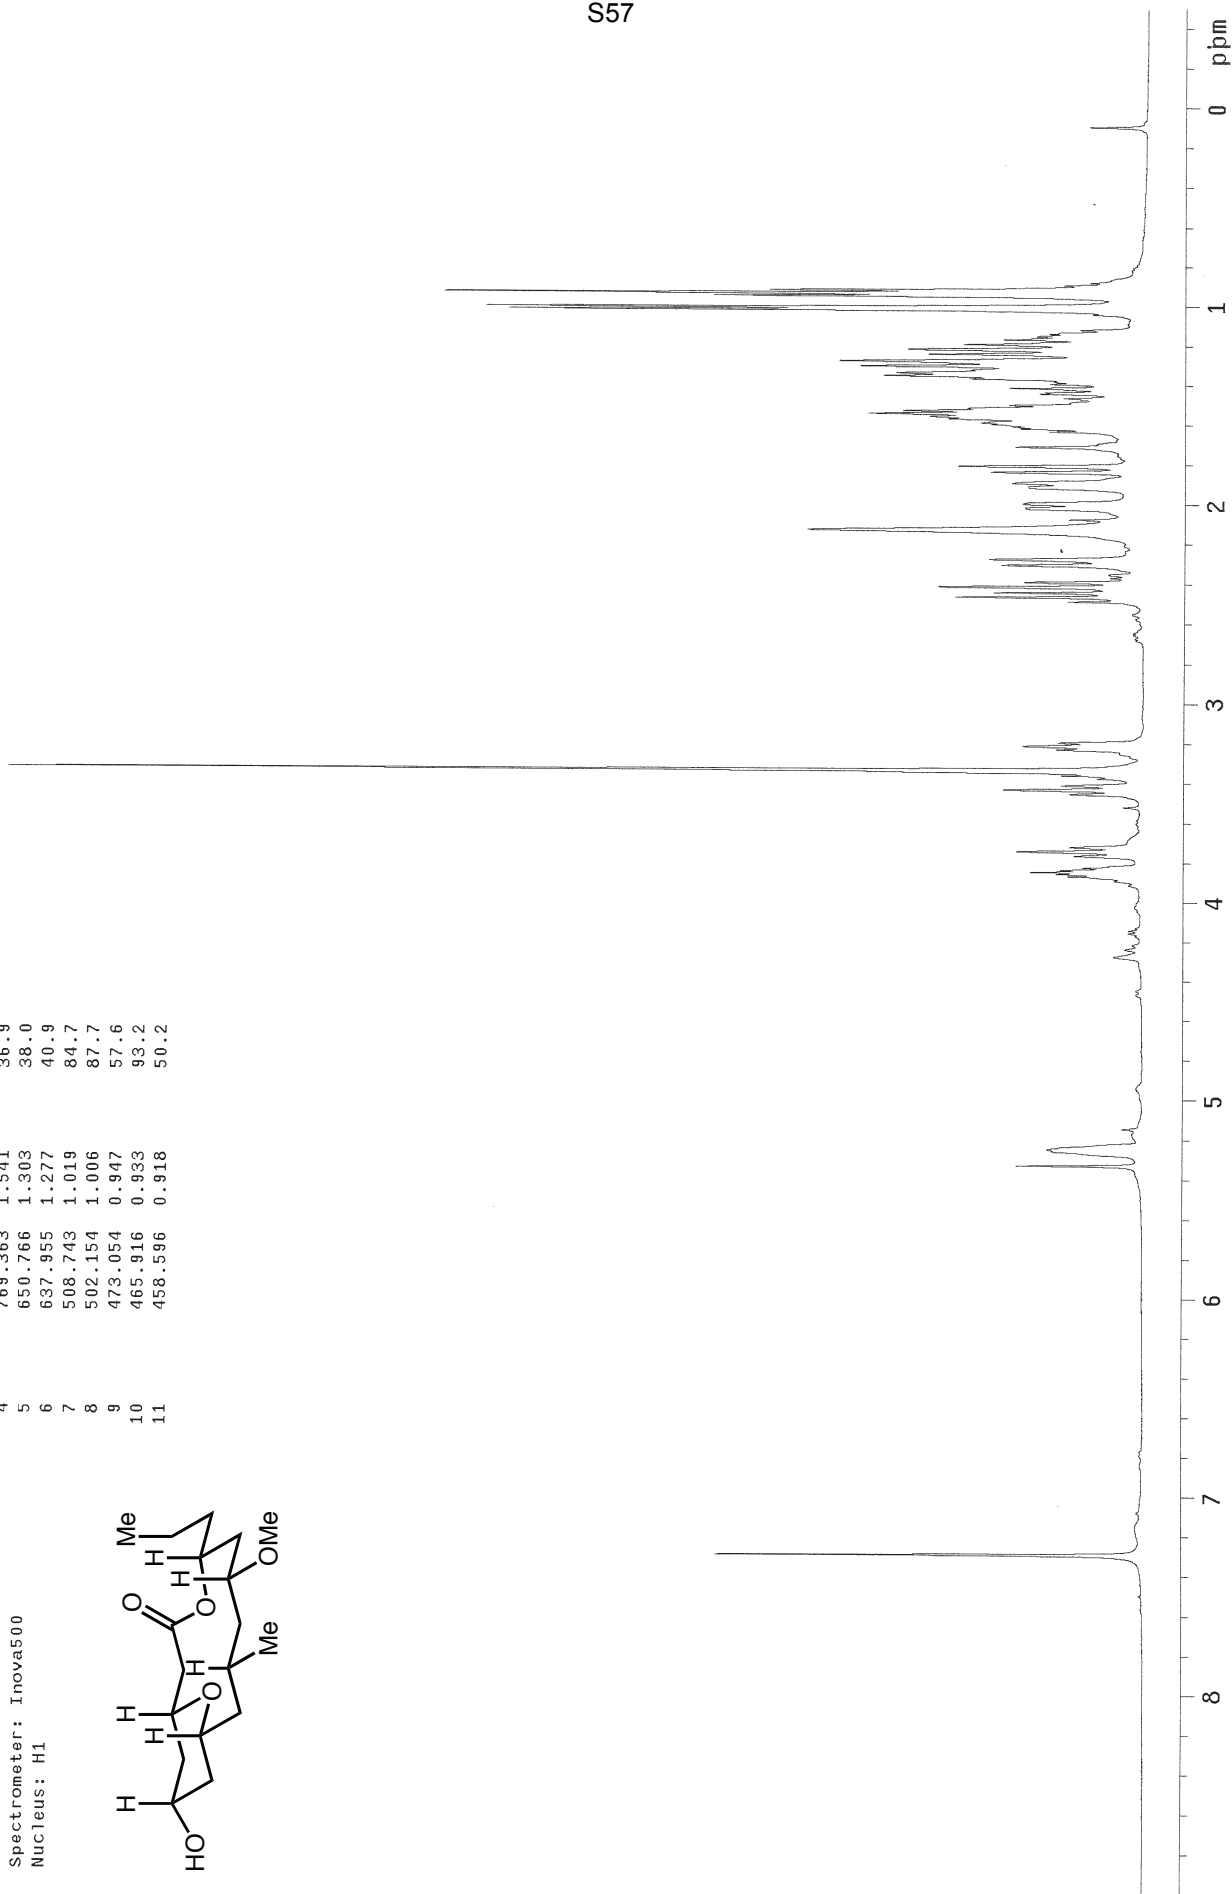

HEIGHT

FREQUENCY PPM

INDEX

C13 std p-500 H/C probe RT  
Date: Sep 23 18:24 CDT 2007  
Solvent: CDCl3

Spectrometer: Inova500  
Nucleus: C13

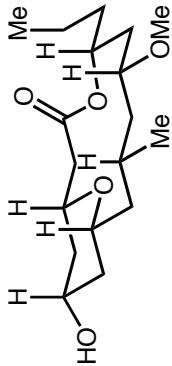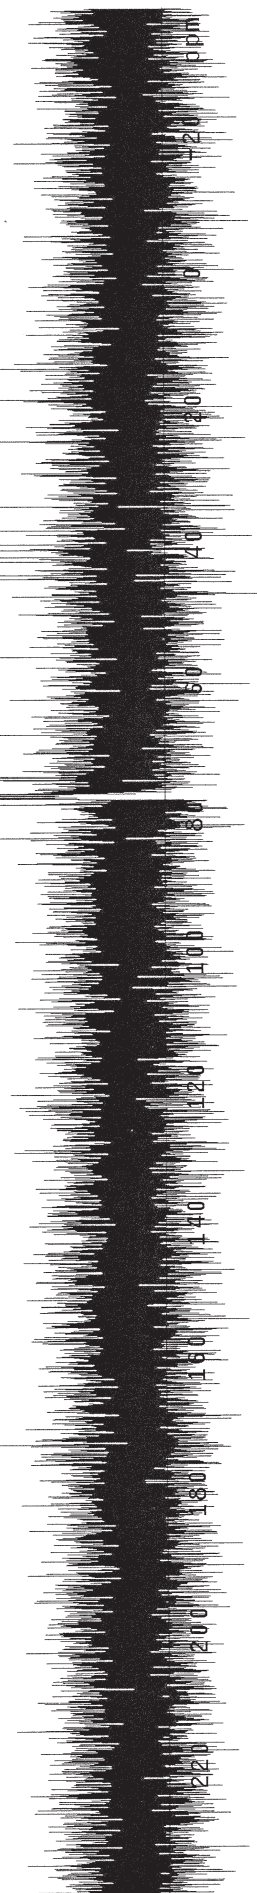

1H LINESHAPE  
 1% CHCl3 (89)  
 Date: Thu Dec 6 16:11:54 CST 2007  
 Solvent: CHCl3  
 File: dan\_custar\_id\_2nd\_110507  
 Spectrometer: Inova500  
 Nucleus: H1

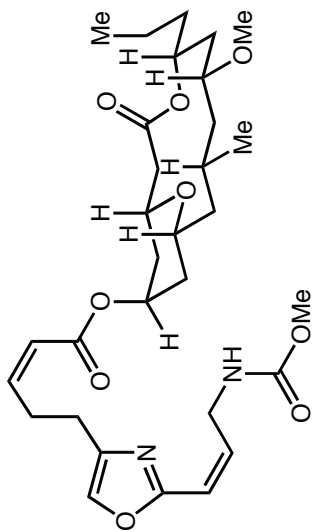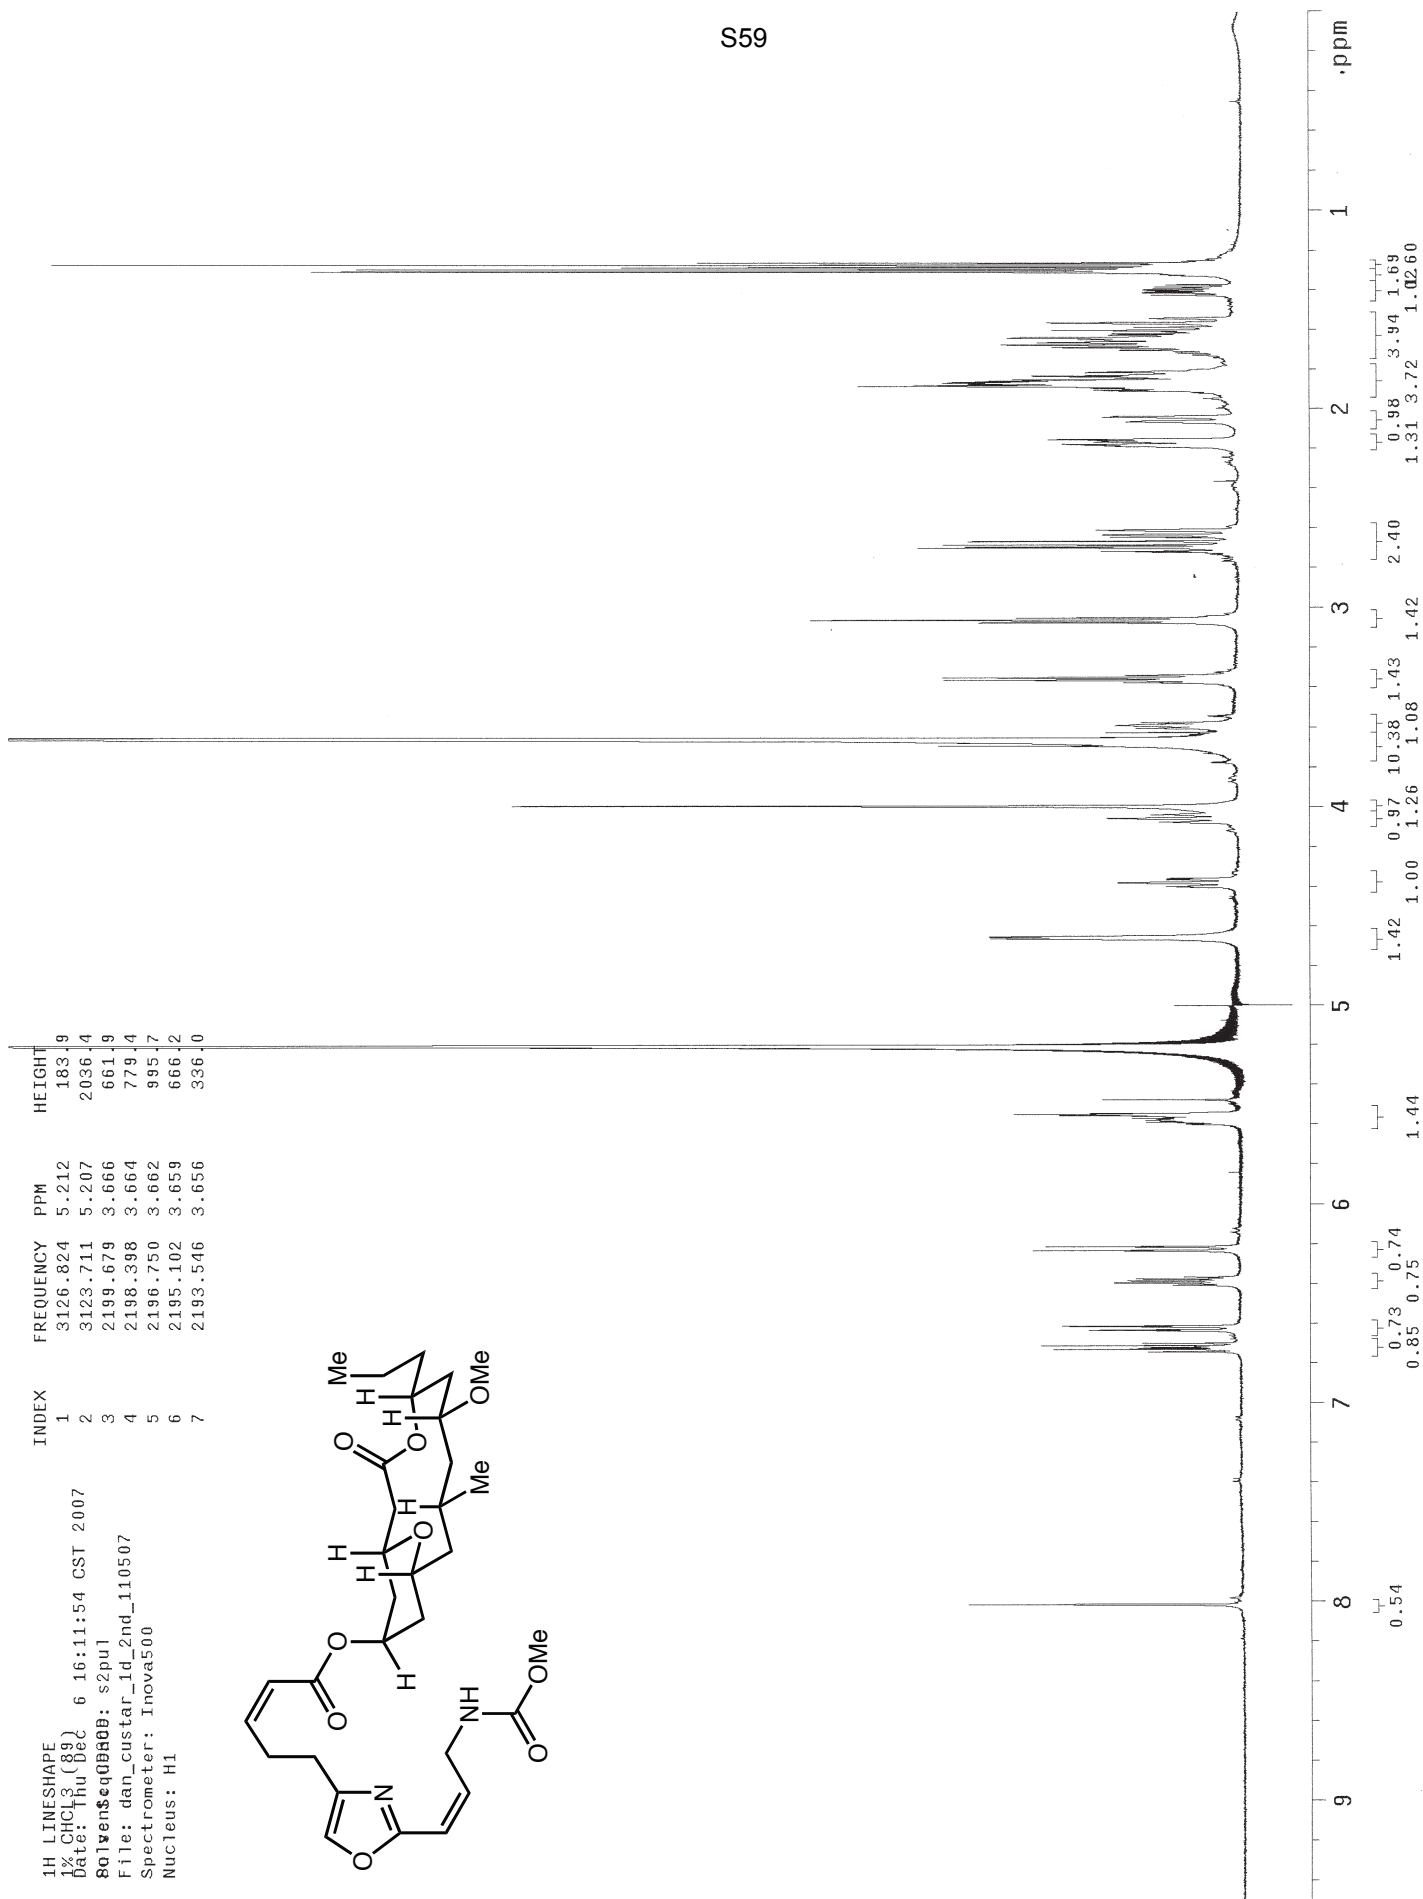

inova400 DB\_5mm RT non-spin  
 C13 std  
 Date: Thu Dec 6 16:43:55 CST 2007  
 Solvent: dms-d6  
 File: dmc5-neodlastc  
 Spectrometer: Mercury400  
 Nucleus: C13

| INDEX | FREQUENCY | PPM    | HEIGHT |
|-------|-----------|--------|--------|
| 1     | 4877.864  | 48.423 | 383.3  |
| 2     | 4856.501  | 48.211 | 1131.8 |
| 3     | 4835.138  | 47.999 | 2249.5 |
| 4     | 4813.775  | 47.787 | 2666.5 |
| 5     | 4792.412  | 47.575 | 2305.4 |
| 6     | 4771.049  | 47.363 | 1140.7 |
| 7     | 4748.923  | 47.143 | 386.5  |

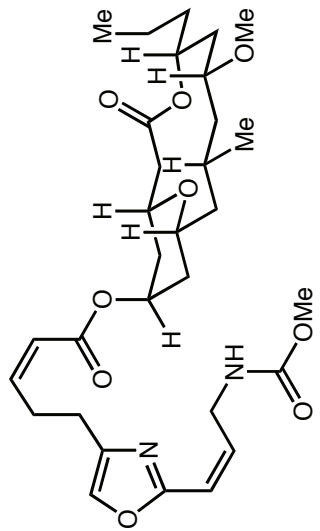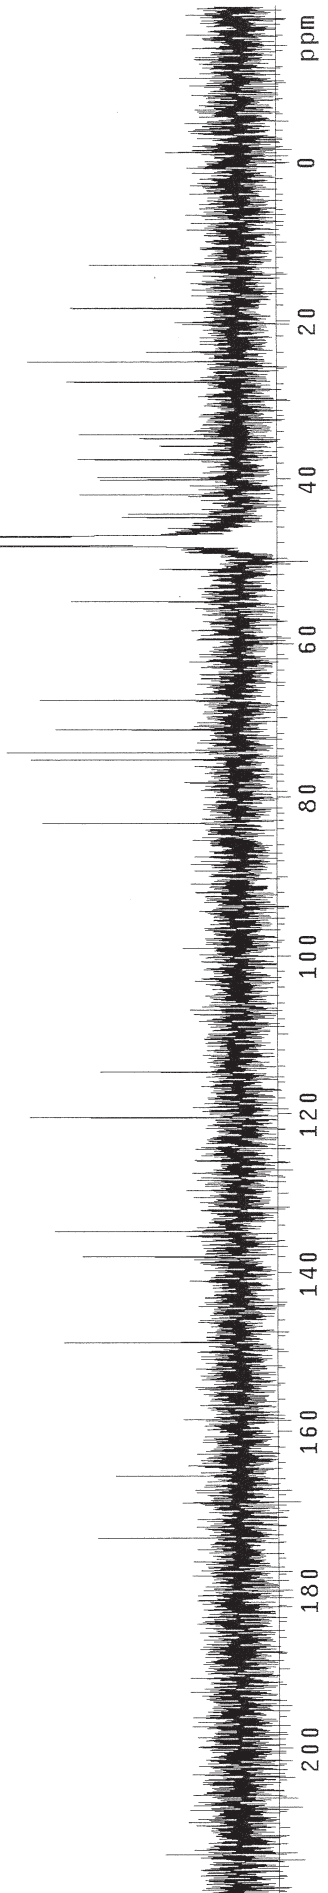

H1 stdpar RT idpfg\_5mm inova500  
 Patte: 20080824N085100 CDT 2007  
 Solvent: cd3od

| INDEX | FREQUENCY PPM | HEIGHT  |
|-------|---------------|---------|
| 1     | 2036.354      | -604.1  |
| 2     | 2025.739      | -1171.8 |
| 3     | 2014.941      | -651.0  |
| 4     | 1864.682      | 42.6    |

Spectrometer: Inova500  
 Nucleus: H1

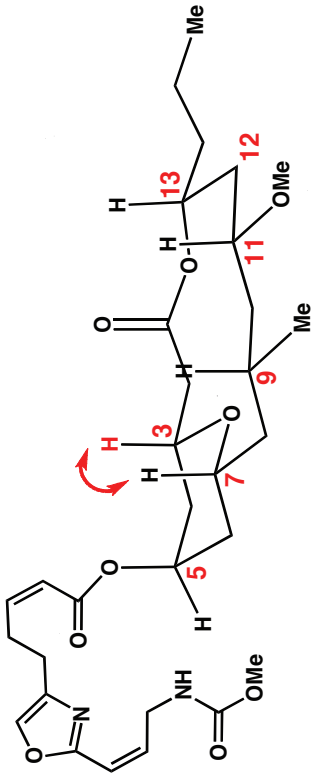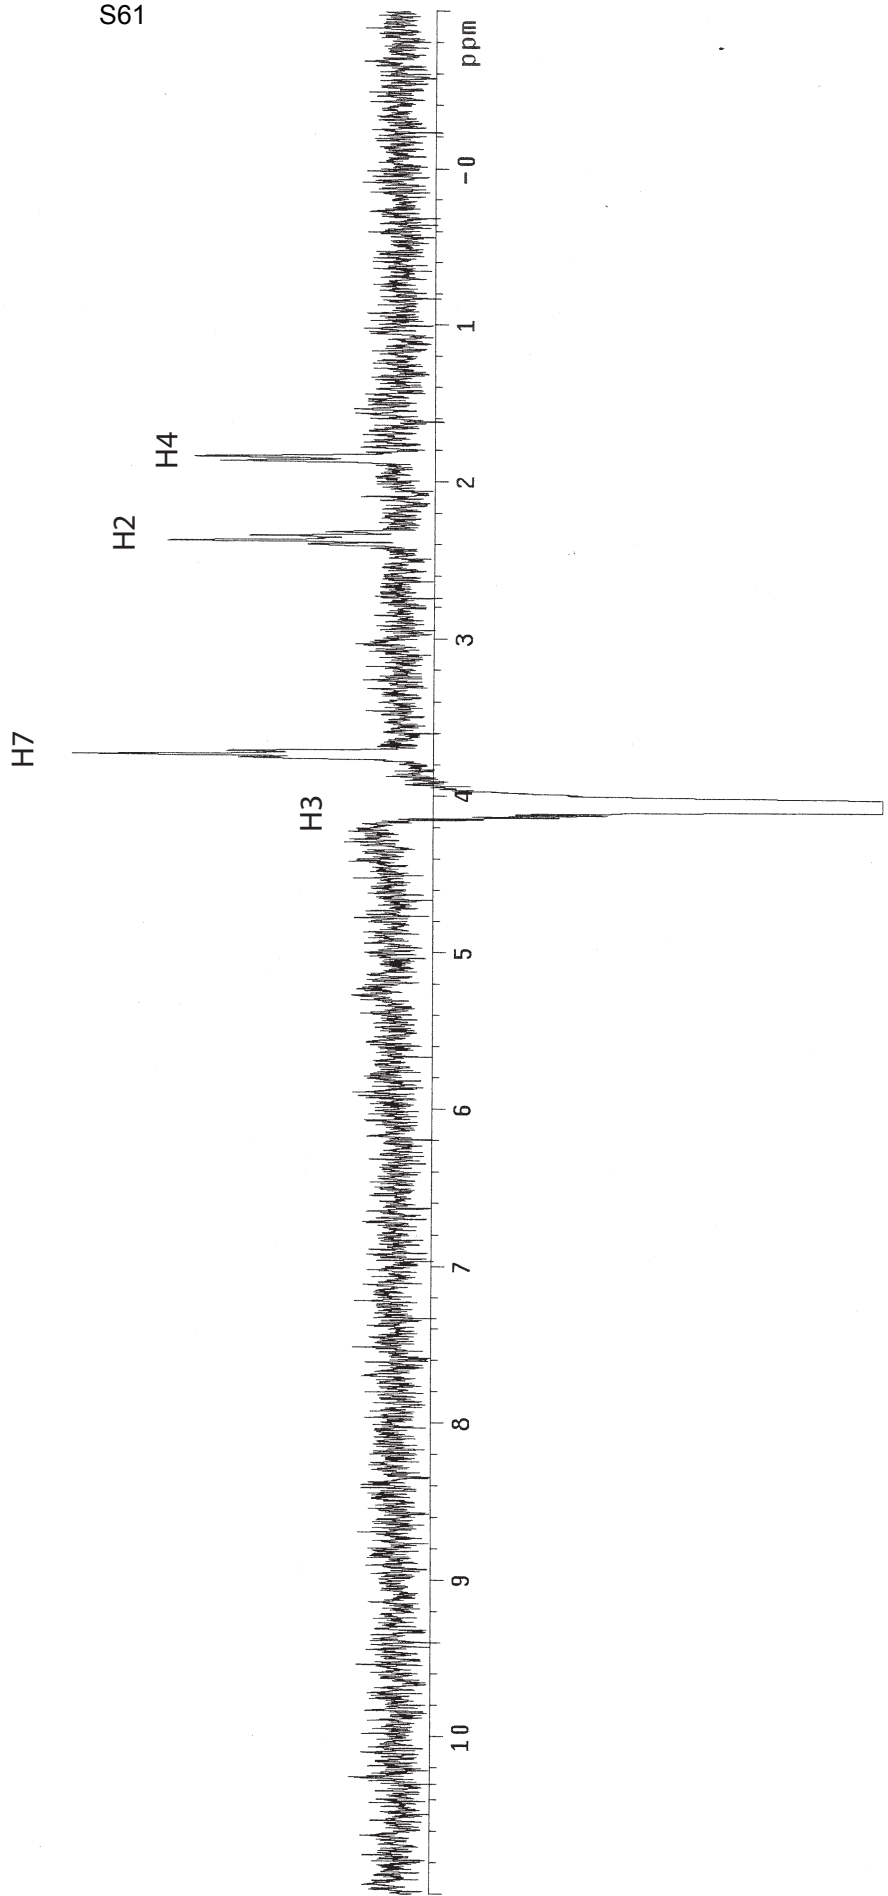

H1 stdpar RT idpfg\_5mm inova500  
 Pat: 8098882418851615 CDT 2007  
 Solvent: cd3od  
 Spectrometer: Inova500  
 Nucleus: H1

| INDEX | FREQUENCY PPM | HEIGHT |
|-------|---------------|--------|
| 1     | 2026.471      | 36.6   |
| 2     | 1893.233      | -33.7  |
| 3     | 1875.114      | -506.0 |
| 4     | 1864.682      | -936.9 |
| 5     | 1853.518      | -577.2 |
| 6     | 1837.961      | -133.7 |

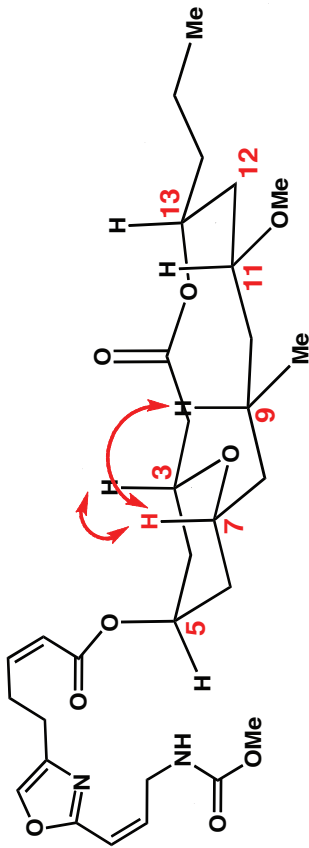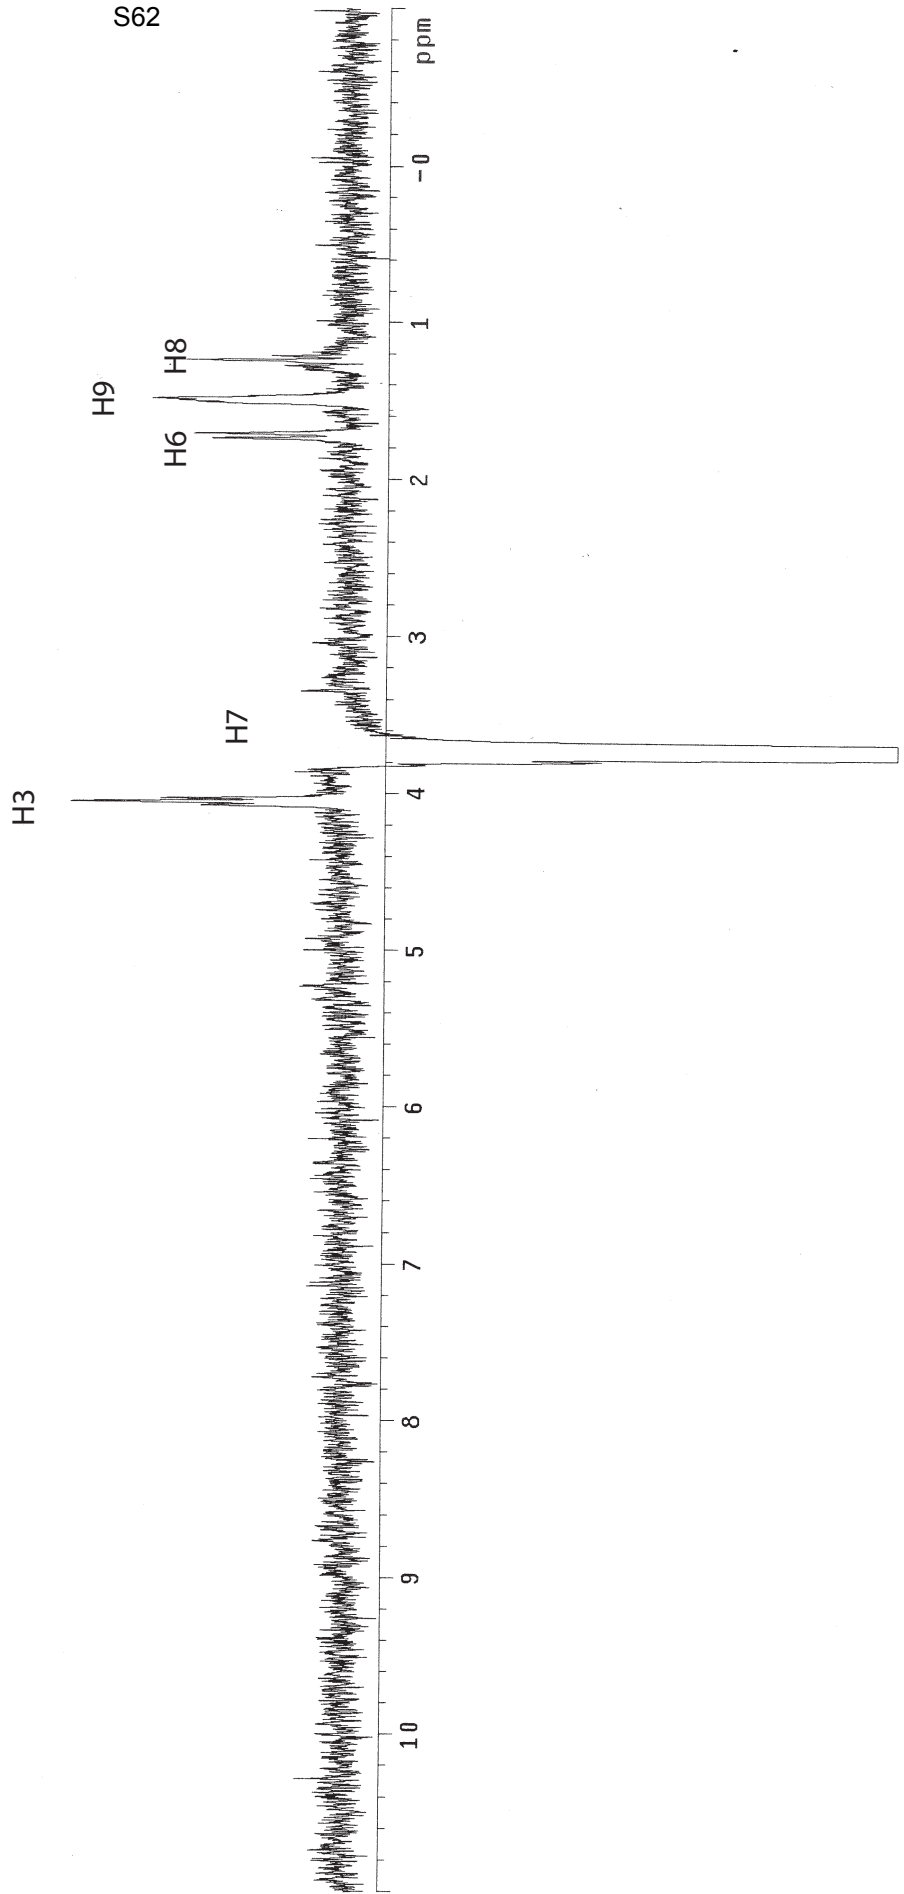

S62

| INDEX | FREQUENCY | PPM   | HEIGHT  |
|-------|-----------|-------|---------|
| 1     | 2620.919  | 5.248 | 33.5    |
| 2     | 1668.668  | 3.341 | 132.2   |
| 3     | 1649.268  | 3.302 | -409.0  |
| 4     | 1638.287  | 3.280 | -1004.1 |
| 5     | 1630.417  | 3.265 | -1527.4 |
| 6     | 1622.547  | 3.249 | -1053.9 |
| 7     | 743.870   | 1.490 | 34.6    |

H1 stdpar RT idpfg\_5mm inova500  
 Path: N090808e:4\N0851011 CDT 2007  
 Solvent: CD3OD

Spectrometer: Inova500  
 Nucleus: H1

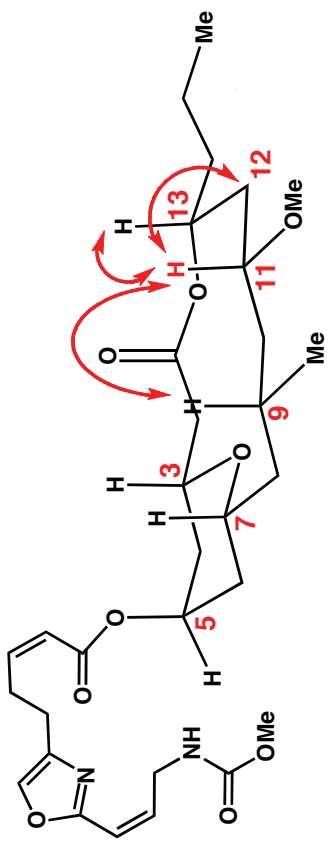

OMe

S63

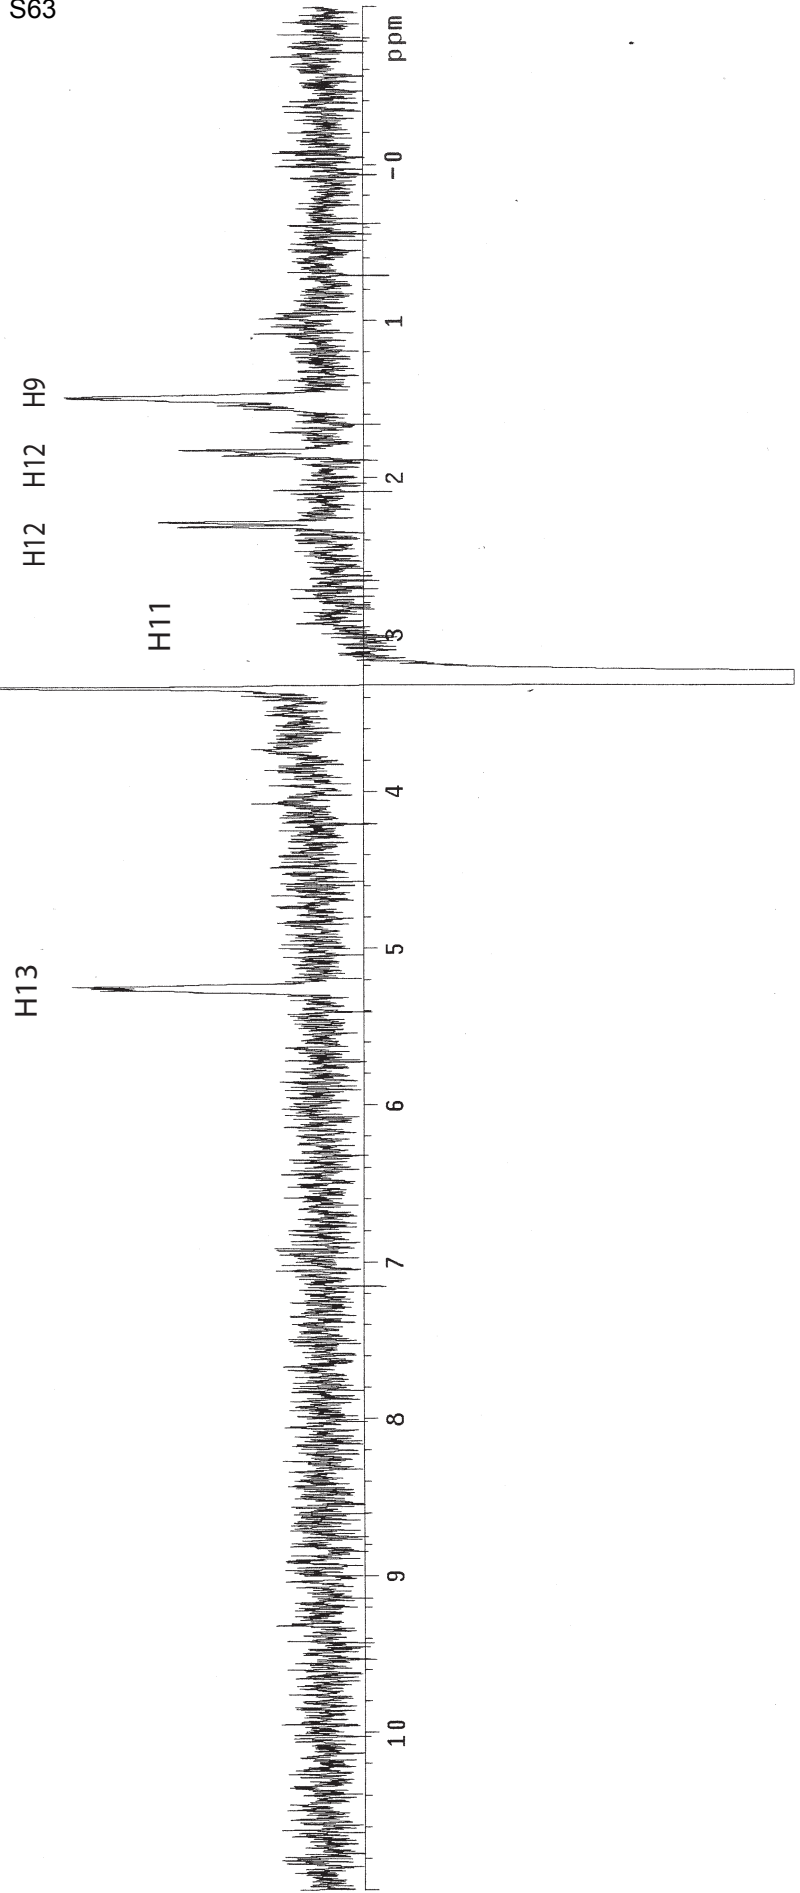

H1 stdpar RT idpfg\_5mm inova500  
Date: 20070813 CDT 2007  
Solvent: cd3od

| INDEX | FREQUENCY | PPM   | HEIGHT |
|-------|-----------|-------|--------|
| 1     | 2631.168  | 5.269 | -789.8 |
| 2     | 2625.860  | 5.258 | -913.3 |
| 3     | 2621.102  | 5.248 | -891.7 |
| 4     | 2614.696  | 5.236 | -665.8 |
| 5     | 771.323   | 1.544 | 41.3   |

Spectrometer: Inova500  
Nucleus: H1

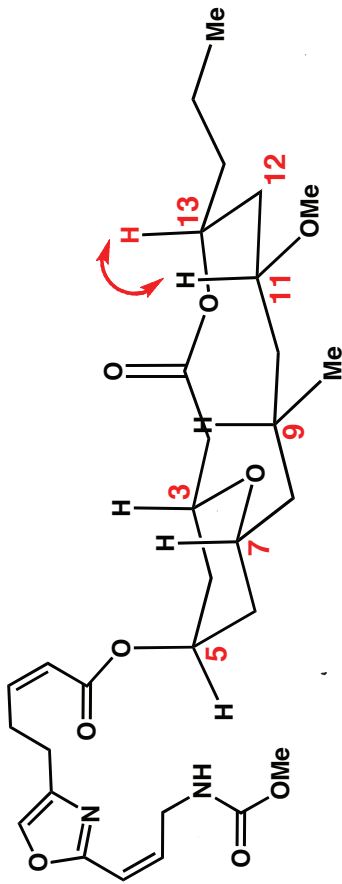

H14

H11

H12

S64

H13

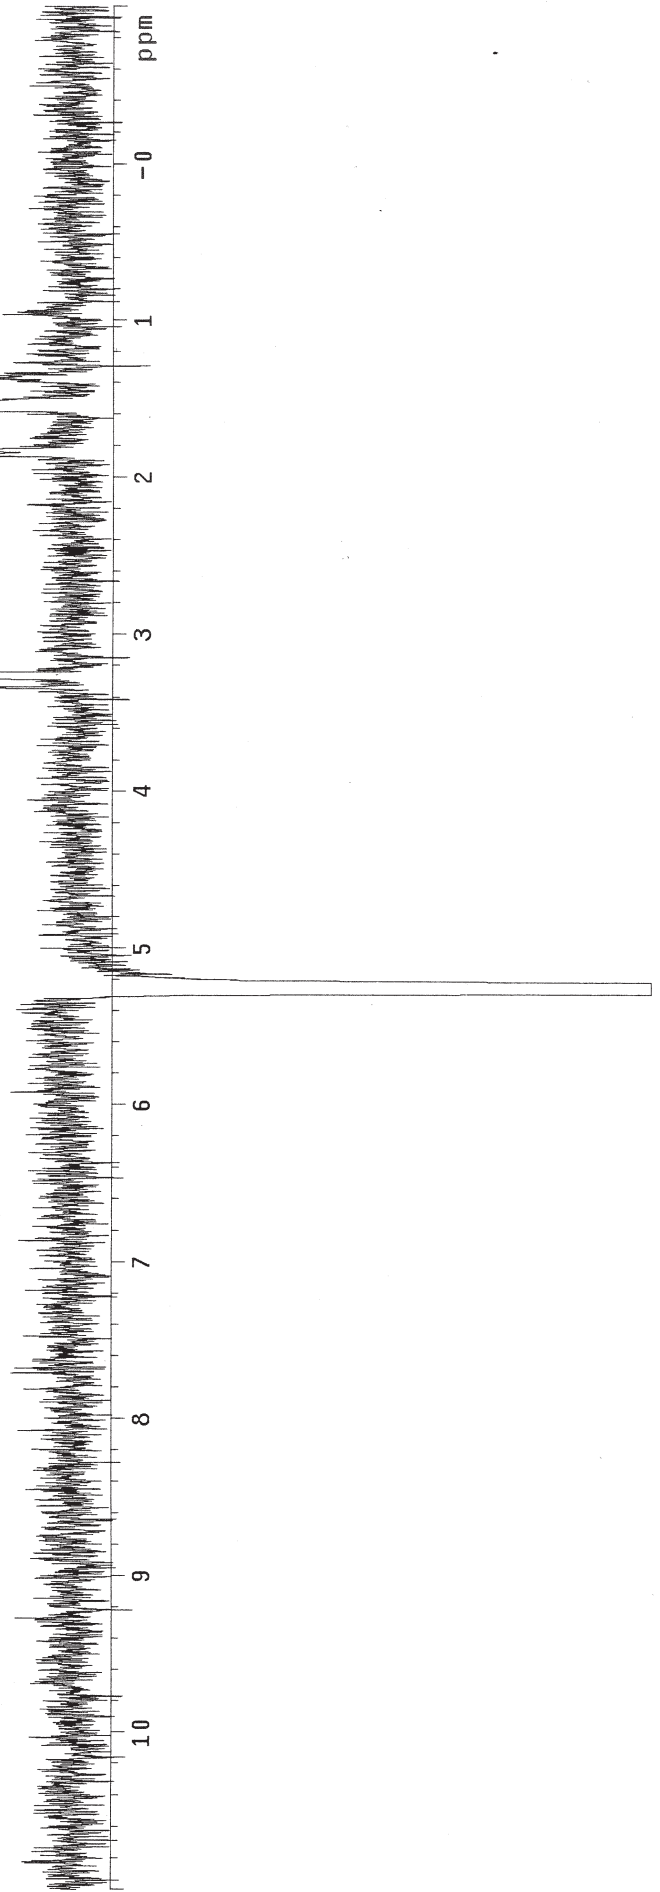







C13 std p-500 H/C probe RT  
 Path: S:\Data\6s\140:11 CST 2007  
 Solvent: CDCl3  
 File: 1-236C13  
 Spectrometer: Inova500  
 Nucleus: C13

| INDEX | FREQUENCY | PPM    | HEIGHT |
|-------|-----------|--------|--------|
| 1     | 9736.799  | 77.485 | 456.2  |
| 2     | 9704.801  | 77.230 | 467.1  |
| 3     | 9672.803  | 76.975 | 459.0  |

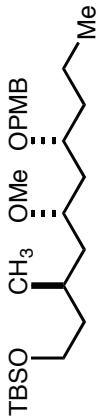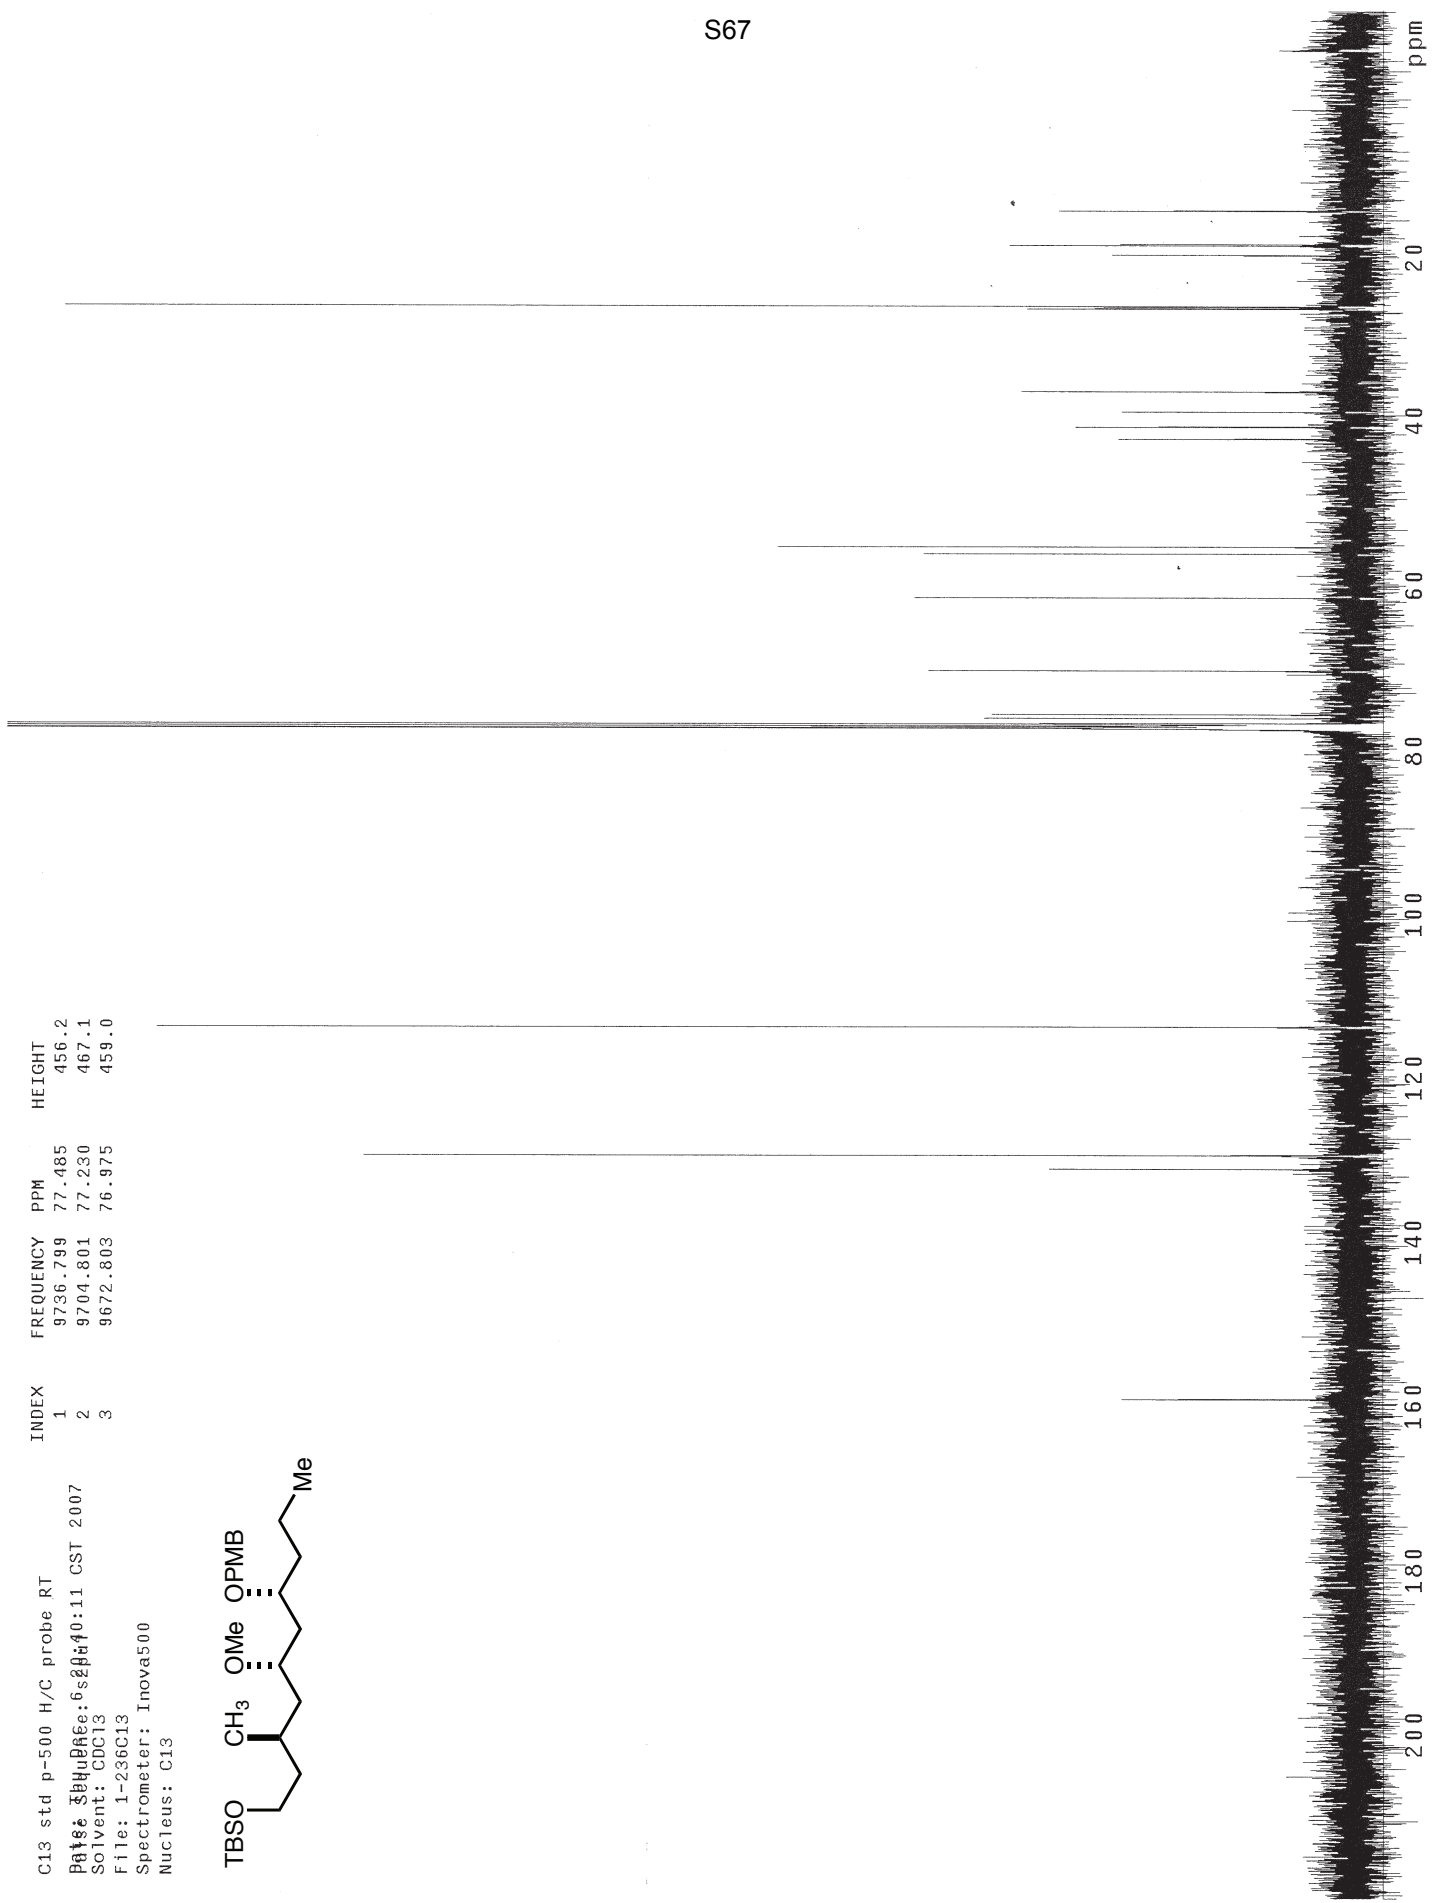





TZ: 1-225, f7-8  
 Pat# 5,800,816; 5,800,817; 5,800,818; 5,800,819; 5,800,820; 5,800,821; 5,800,822; 5,800,823; 5,800,824; 5,800,825; 5,800,826; 5,800,827; 5,800,828; 5,800,829; 5,800,830; 5,800,831; 5,800,832; 5,800,833; 5,800,834; 5,800,835; 5,800,836; 5,800,837 CDT 2007  
 Solvent: CDCl3  
 Spectrometer: Inova500  
 Nucleus: H1

| INDEX | FREQUENCY | PPM   | HEIGHT  |
|-------|-----------|-------|---------|
| 1     | 3713.468  | 7.436 | 33.8    |
| 2     | 3705.049  | 7.419 | 33.0    |
| 3     | 2726.993  | 5.460 | -5031.0 |
| 4     | 1939.276  | 3.883 | 65.6    |
| 5     | 1895.901  | 3.796 | 58.6    |

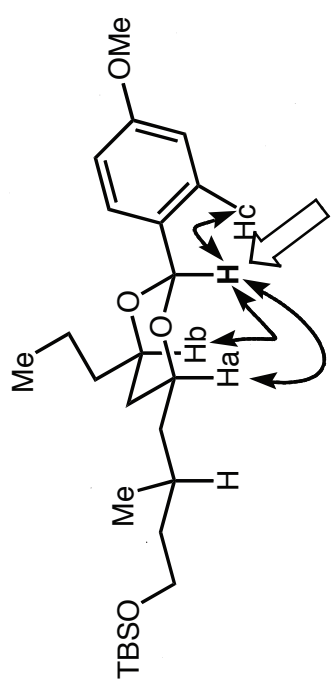

Ha/Hb

Hc

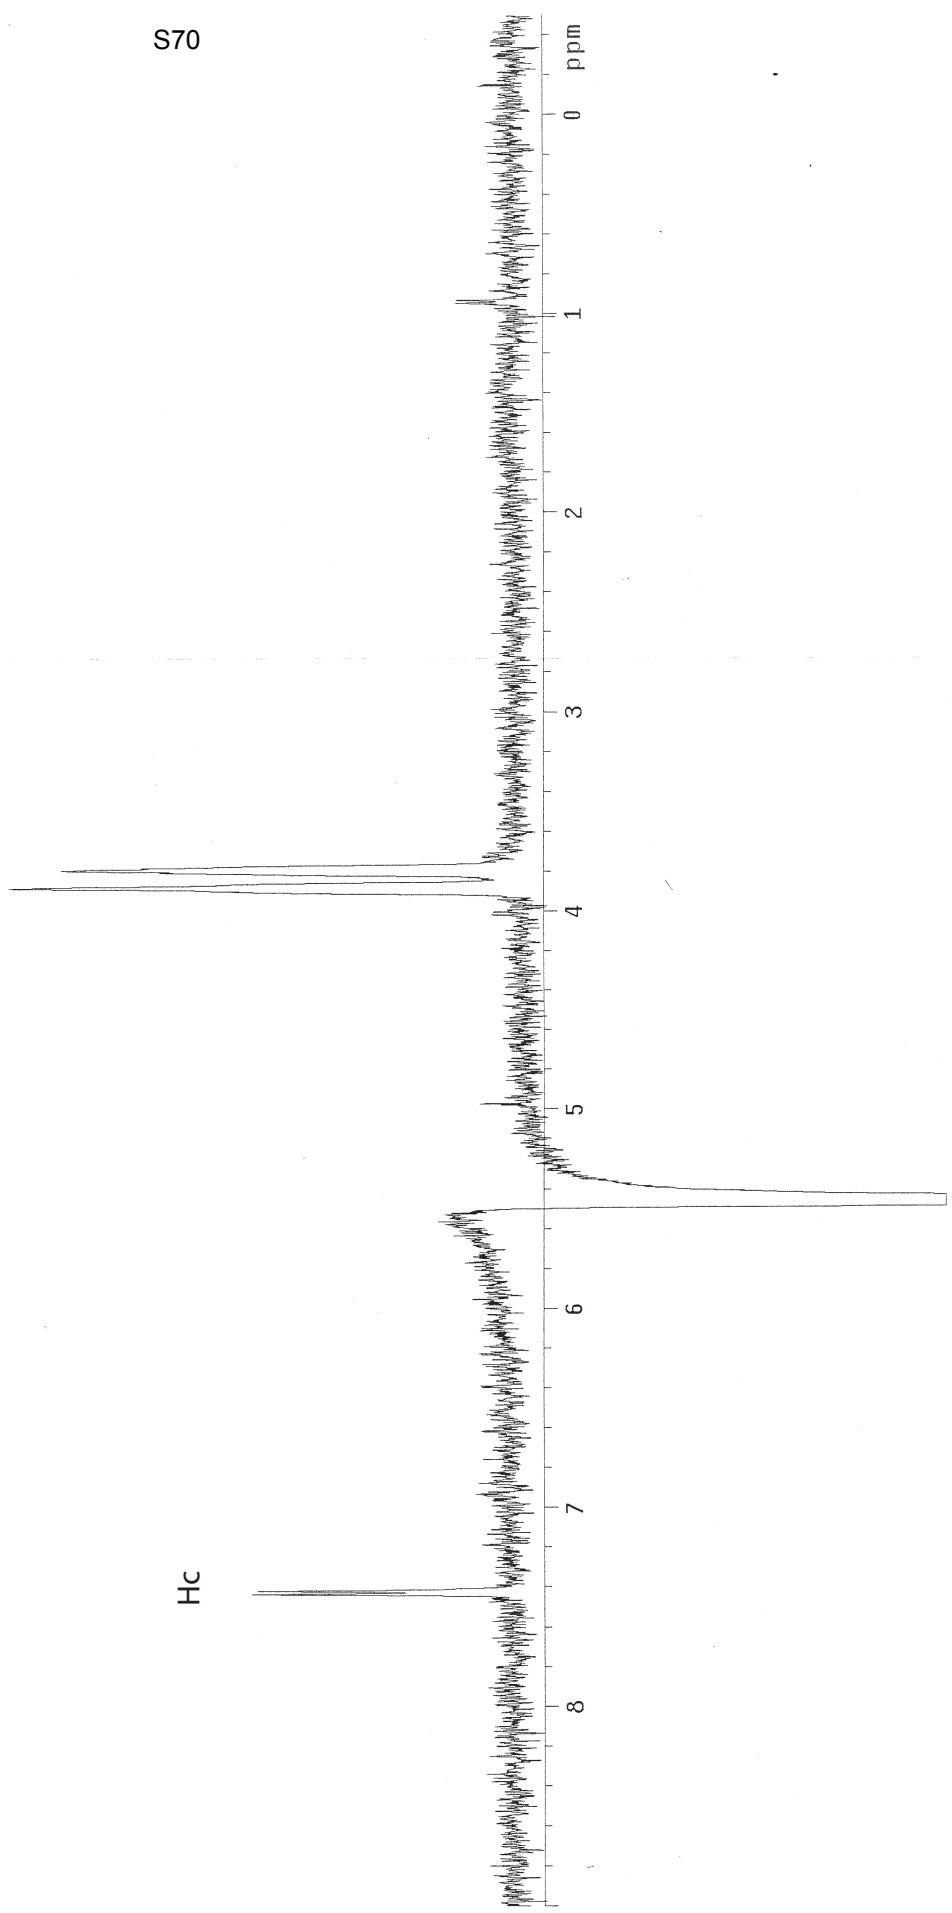







H1\_std P-inova500 H/C probe RT INDEX FREQUENCY PPM HEIGHT  
 -1501.212 -3.004 0.0  
 File: dwc5-mitsunobuH  
 Solvent: CDCl3  
 Spectrometer: Inova500  
 Nucleus: H1

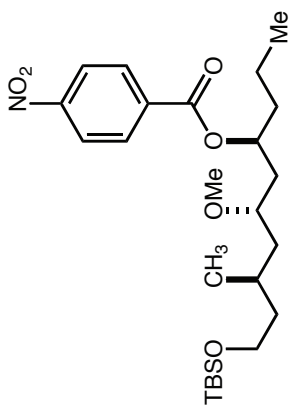

S73

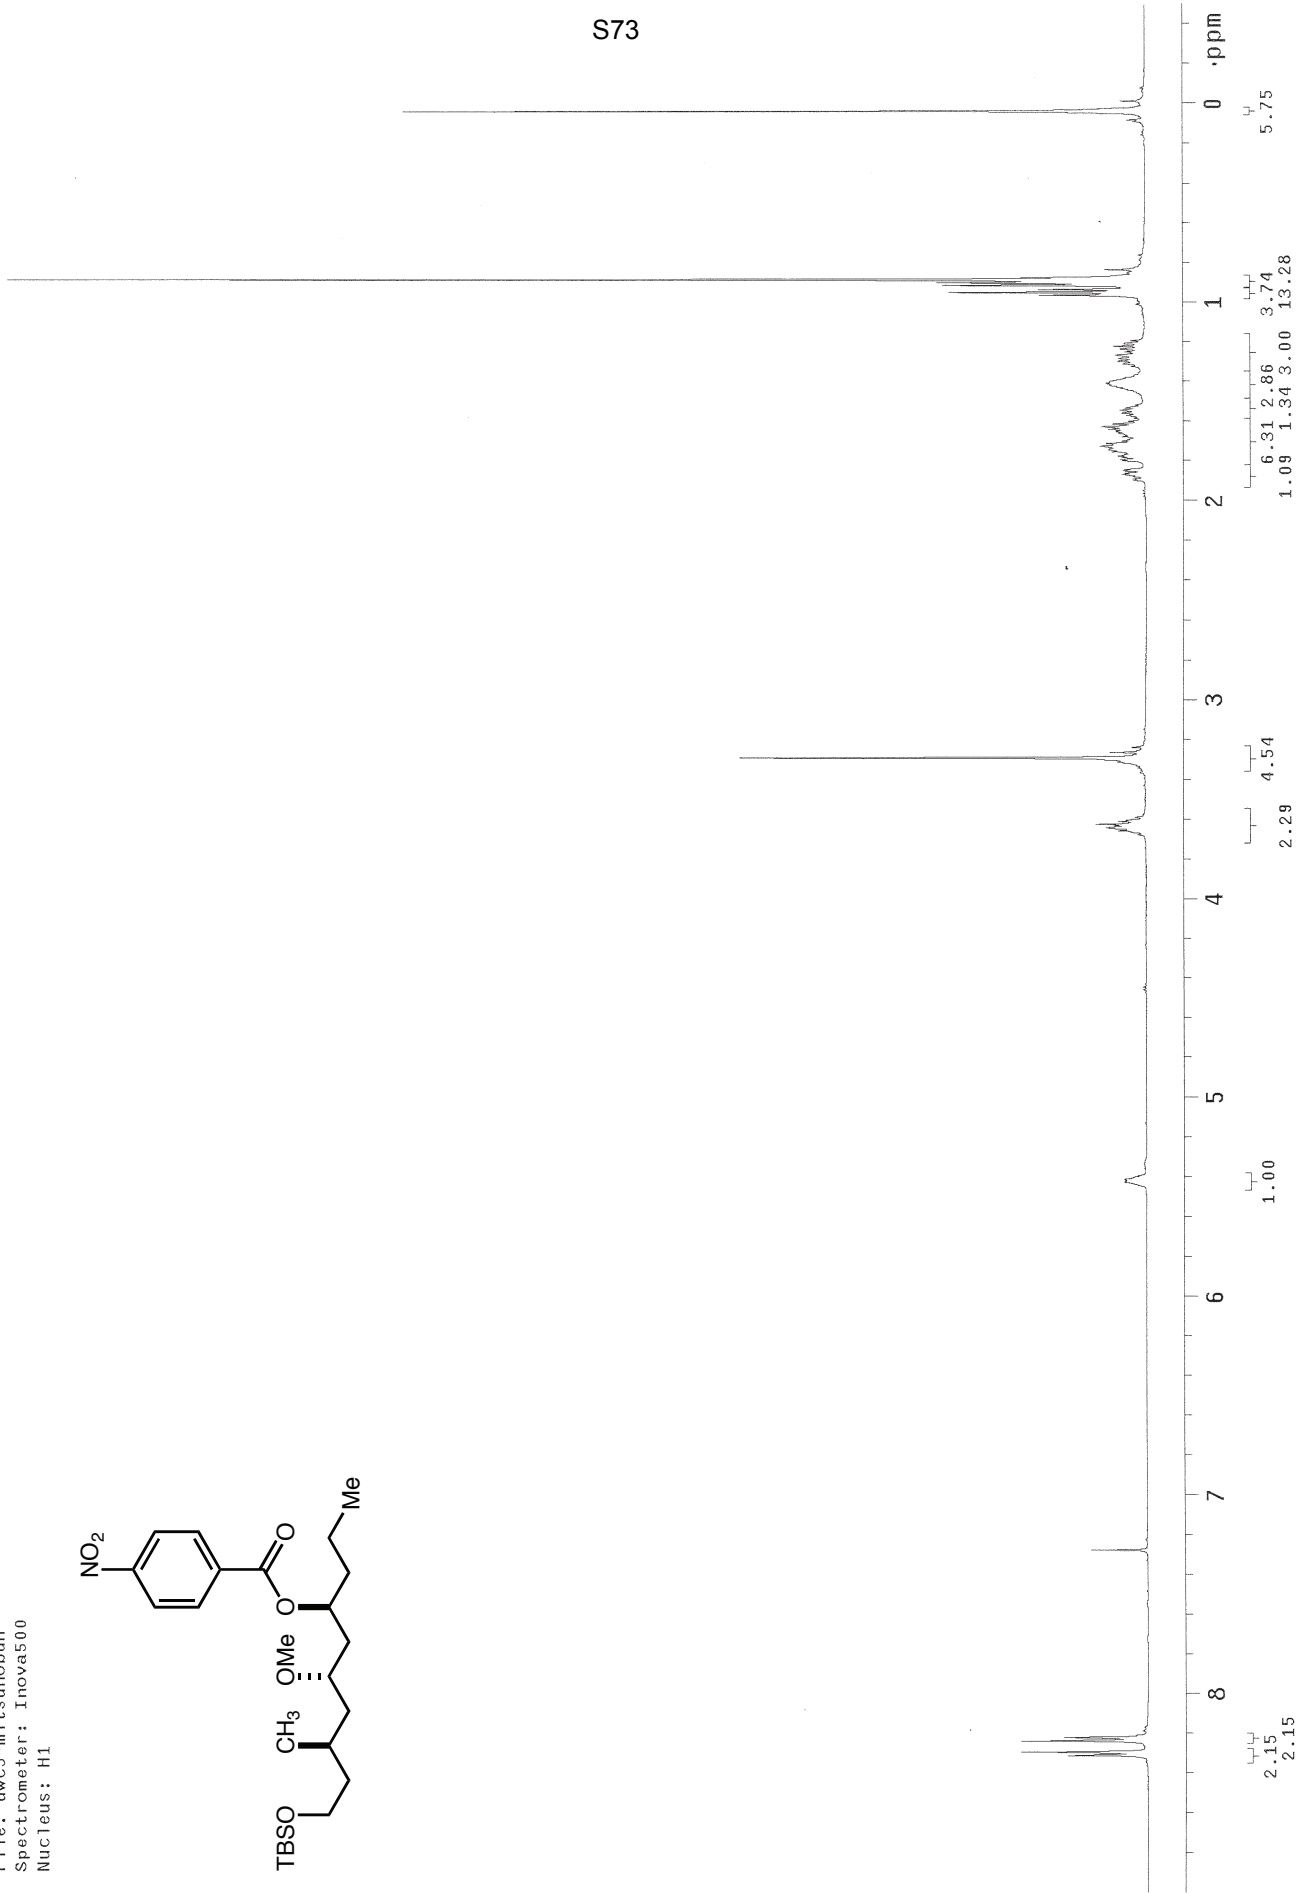

| INDEX | FREQUENCY | PPM    | HEIGHT |
|-------|-----------|--------|--------|
| 1     | 9741.526  | 77.522 | 198.1  |
| 2     | 9709.528  | 77.268 | 197.8  |
| 3     | 9678.063  | 77.017 | 195.3  |

C13 std p-500 H/C probe RT  
 Path: \\hpc\66e:541636:39 CST 2007  
 Solvent: CDCl3  
 File: dwc5-mitsunobu  
 Spectrometer: Inova500  
 Nucleus: C13

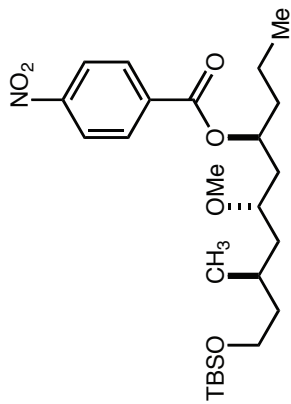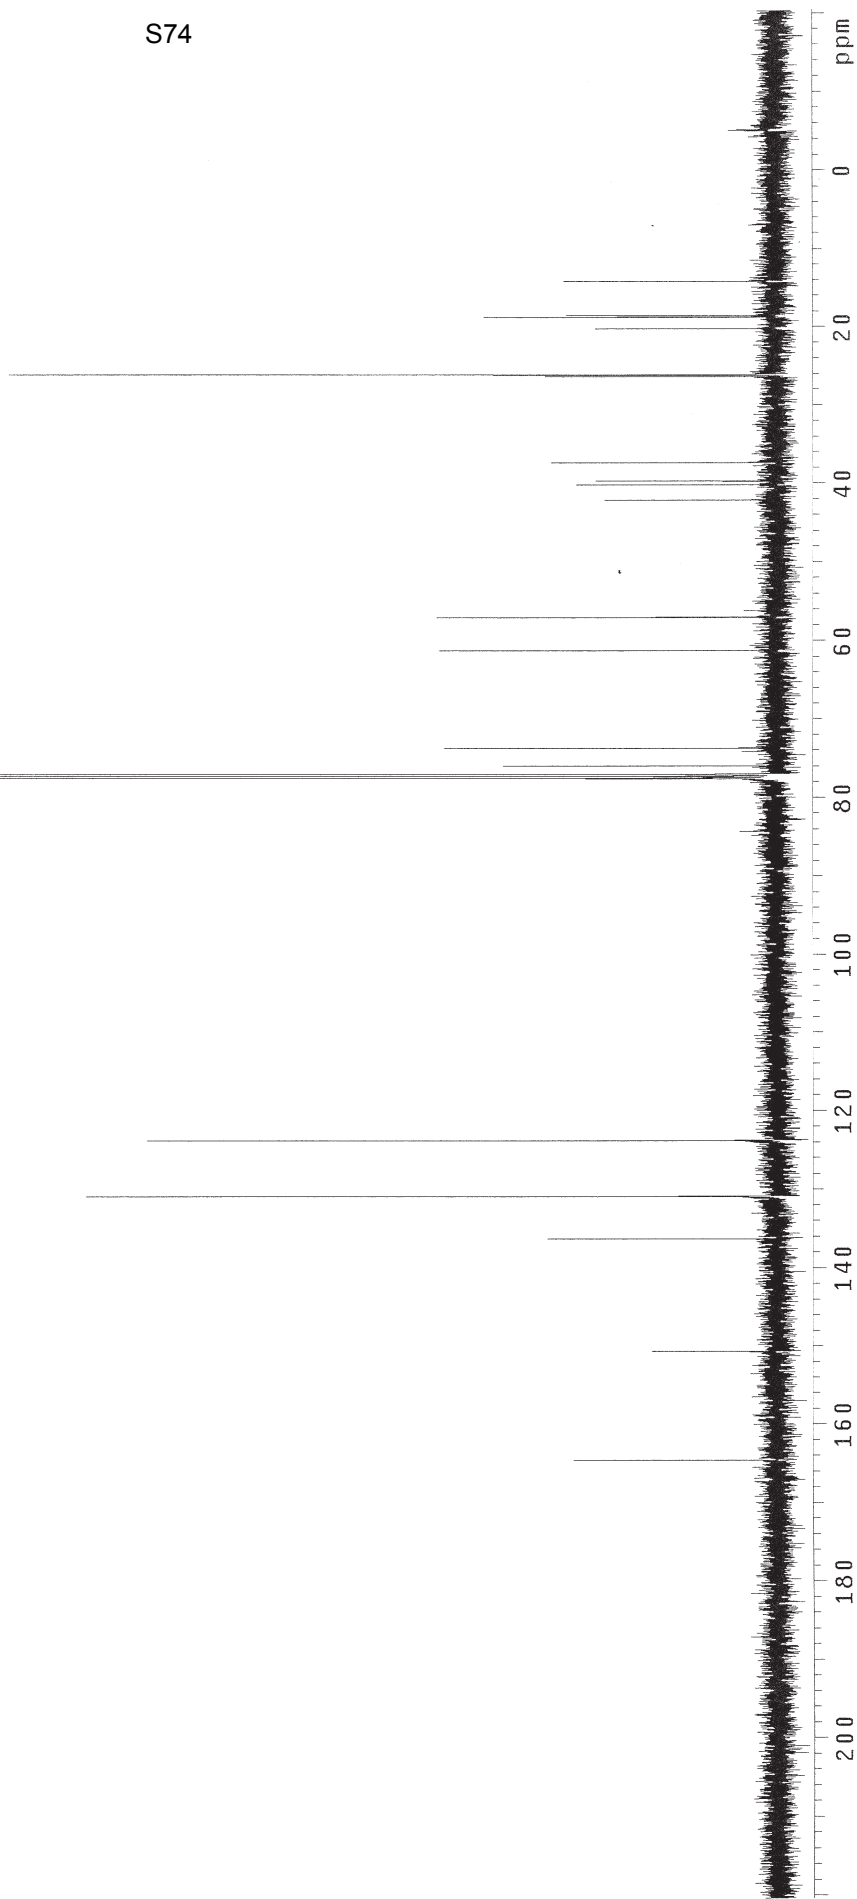

H1\_std P-inova500 H/C probe RT INDEX FREQUENCY PPM HEIGHT

File: dwc5-hydrolysis.h File: 6s217:40 CST 2007

Solvent: CDCl3

Spectrometer: Inova500

Nucleus: H1

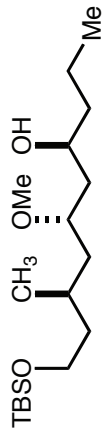

S75

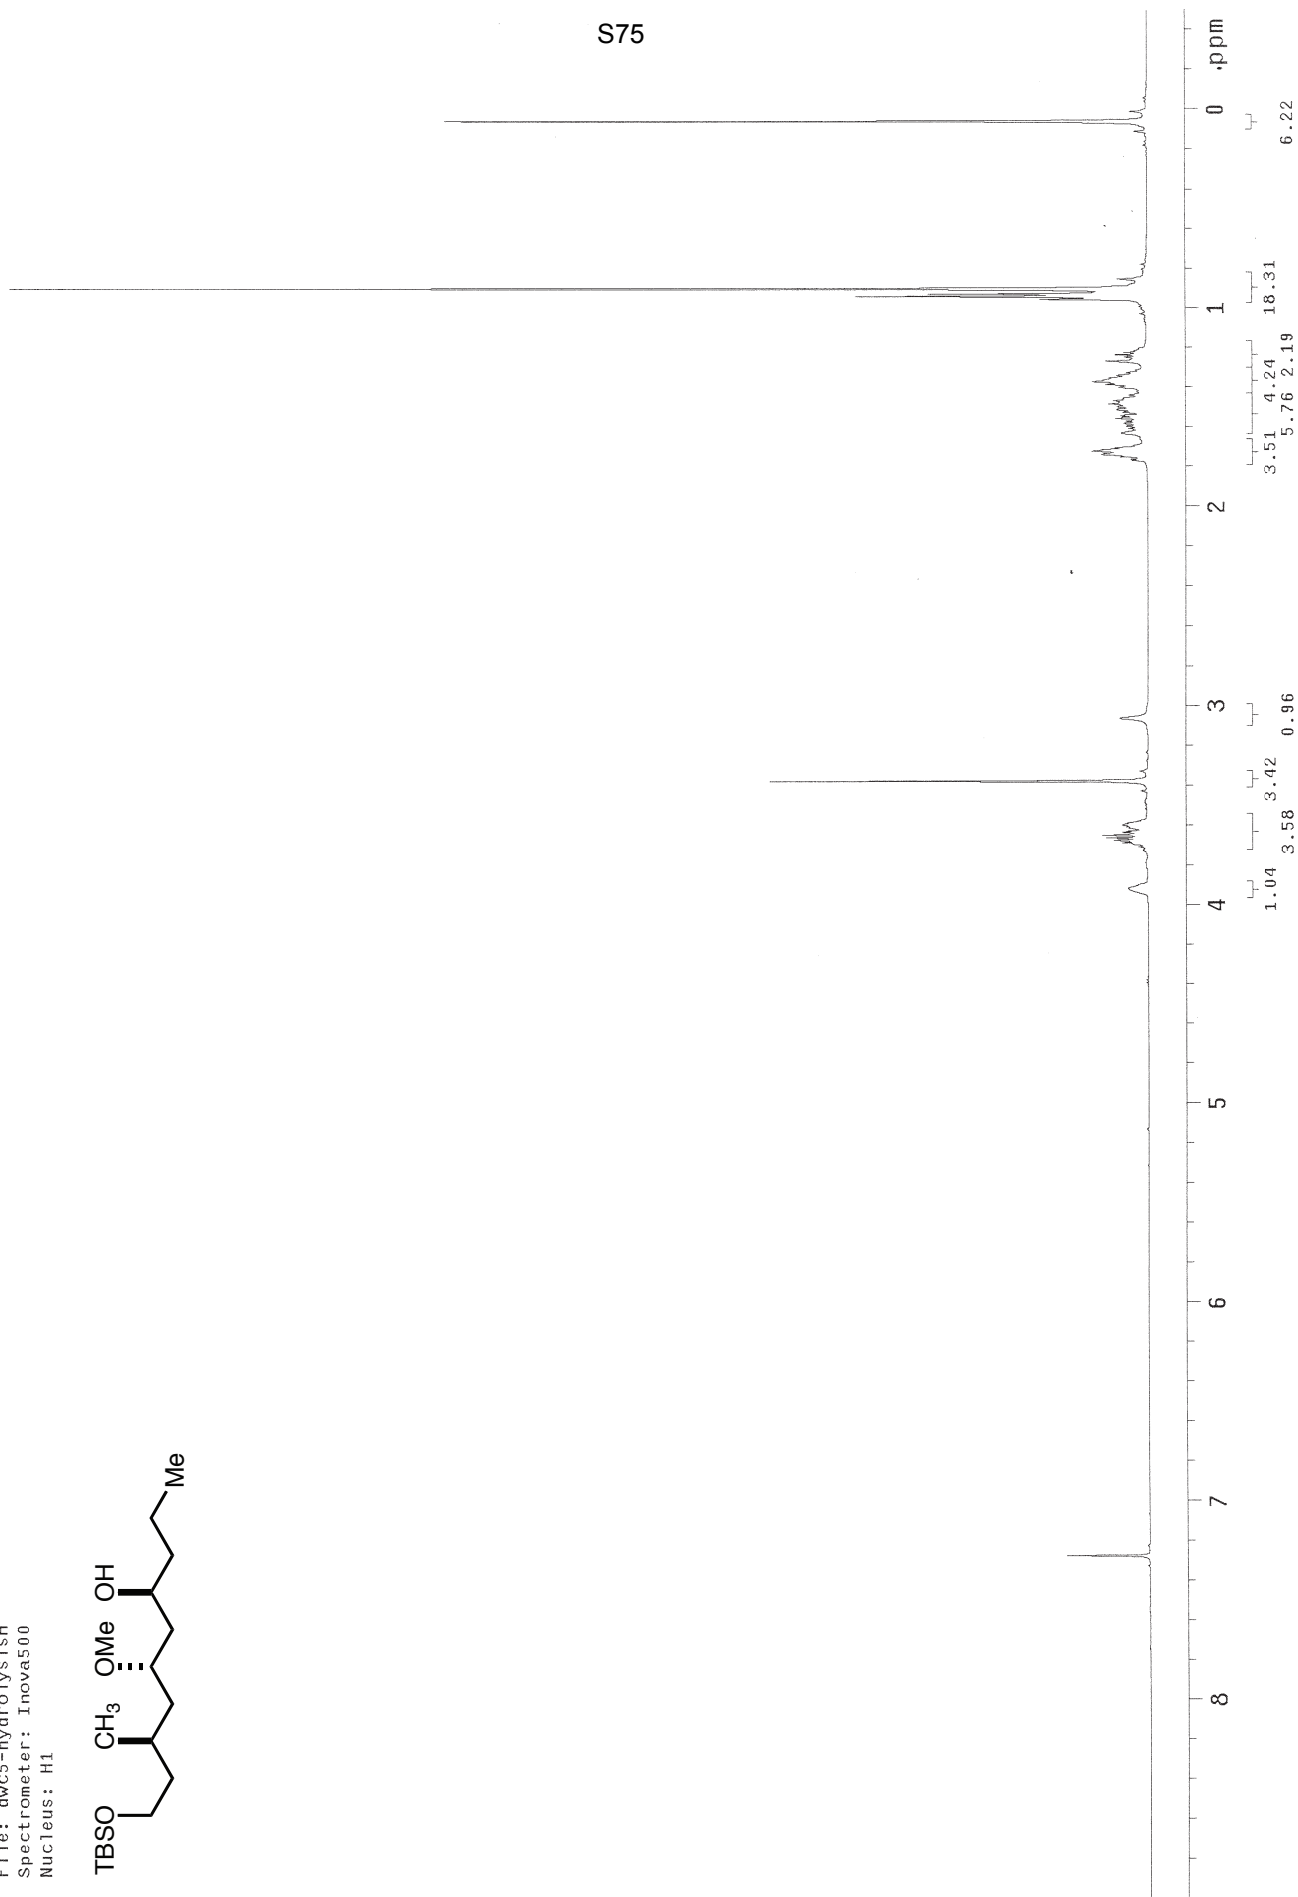

| INDEX | FREQUENCY | PPM    | HEIGHT |
|-------|-----------|--------|--------|
| 1     | 9740.993  | 77.518 | 200.7  |
| 2     | 9708.995  | 77.263 | 207.1  |
| 3     | 9676.997  | 77.009 | 203.7  |

C13 std p-500 H/C probe RT  
 Path: \\bbp066e:6418138:45 CST 2007  
 Solvent: CDCl3  
 File: dwc5-hydrolysis13  
 Spectrometer: Inova500  
 Nucleus: C13

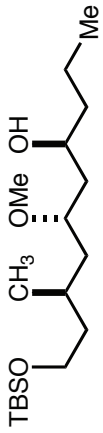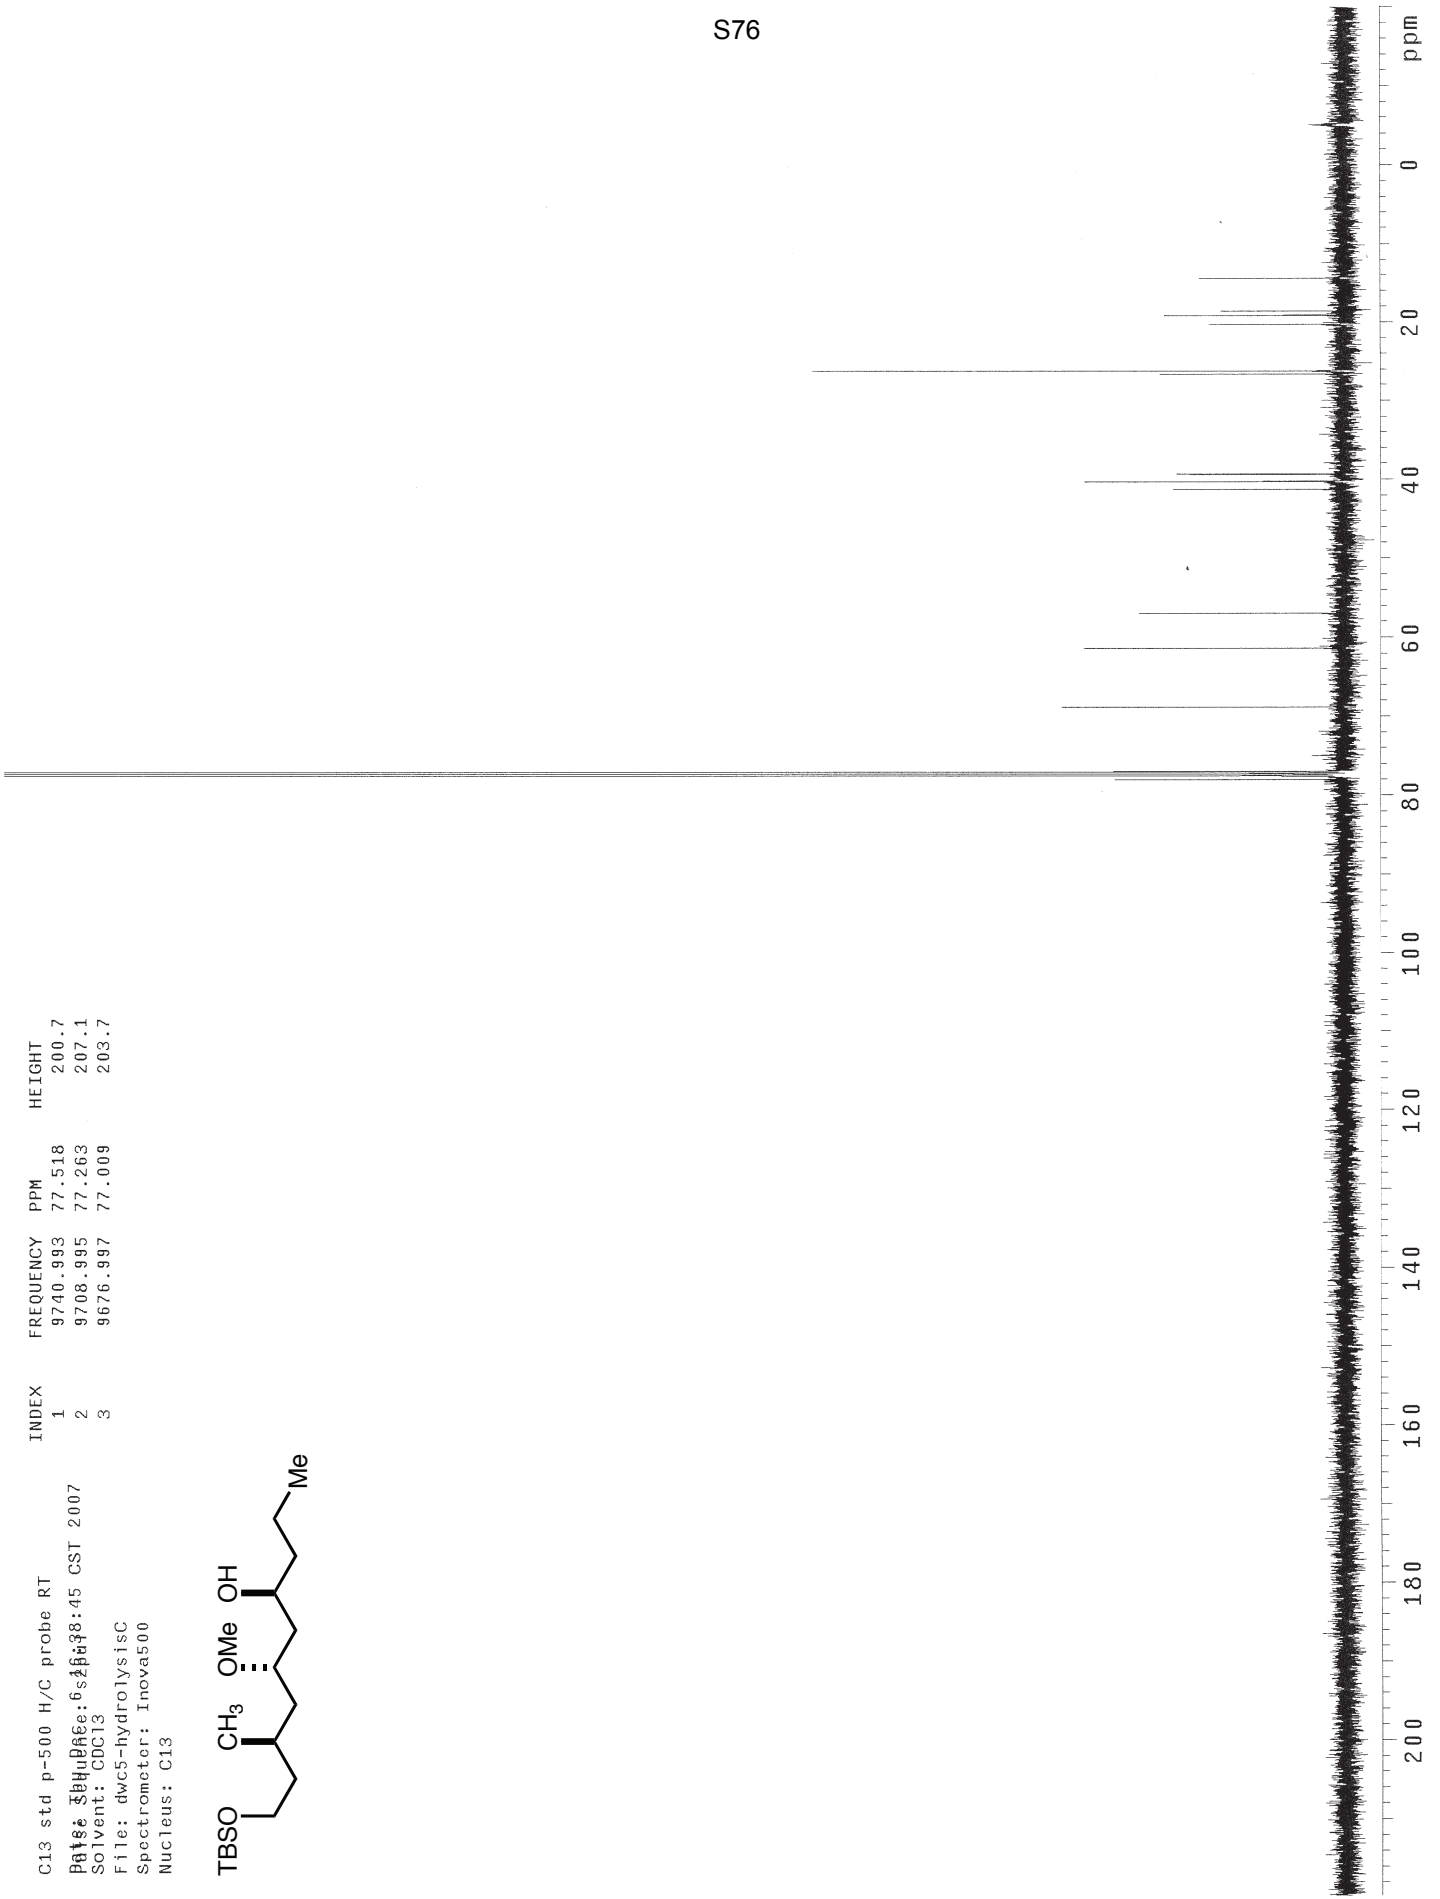

H1\_std P-inova500 H/C probe RT INDEX FREQUENCY PPM HEIGHT

Path: S:\Data\6s1\03:10 CST 2007  
 Solvent: CDCl3  
 File: dwc5-aldehyde  
 Spectrometer: Inova500  
 Nucleus: H1

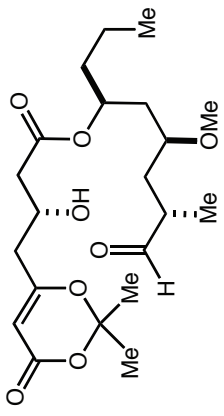

S77

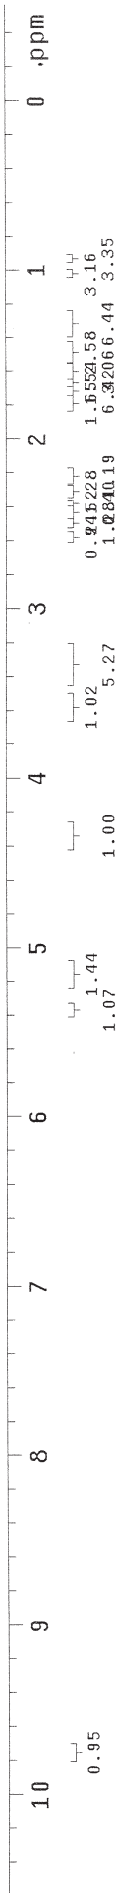

| INDEX | FREQUENCY | PPM    | HEIGHT |
|-------|-----------|--------|--------|
| 1     | 9747.392  | 77.569 | 507.5  |
| 2     | 9715.394  | 77.314 | 520.0  |
| 3     | 9683.396  | 77.060 | 512.1  |

C13 std p-500 H/C probe RT  
 Path: \\hubb\pfe:921613:53 CST 2007  
 Solvent: CDCl3  
 File: dwc5-aldehydeC  
 Spectrometer: Inova500  
 Nucleus: C13

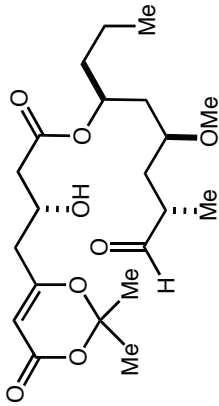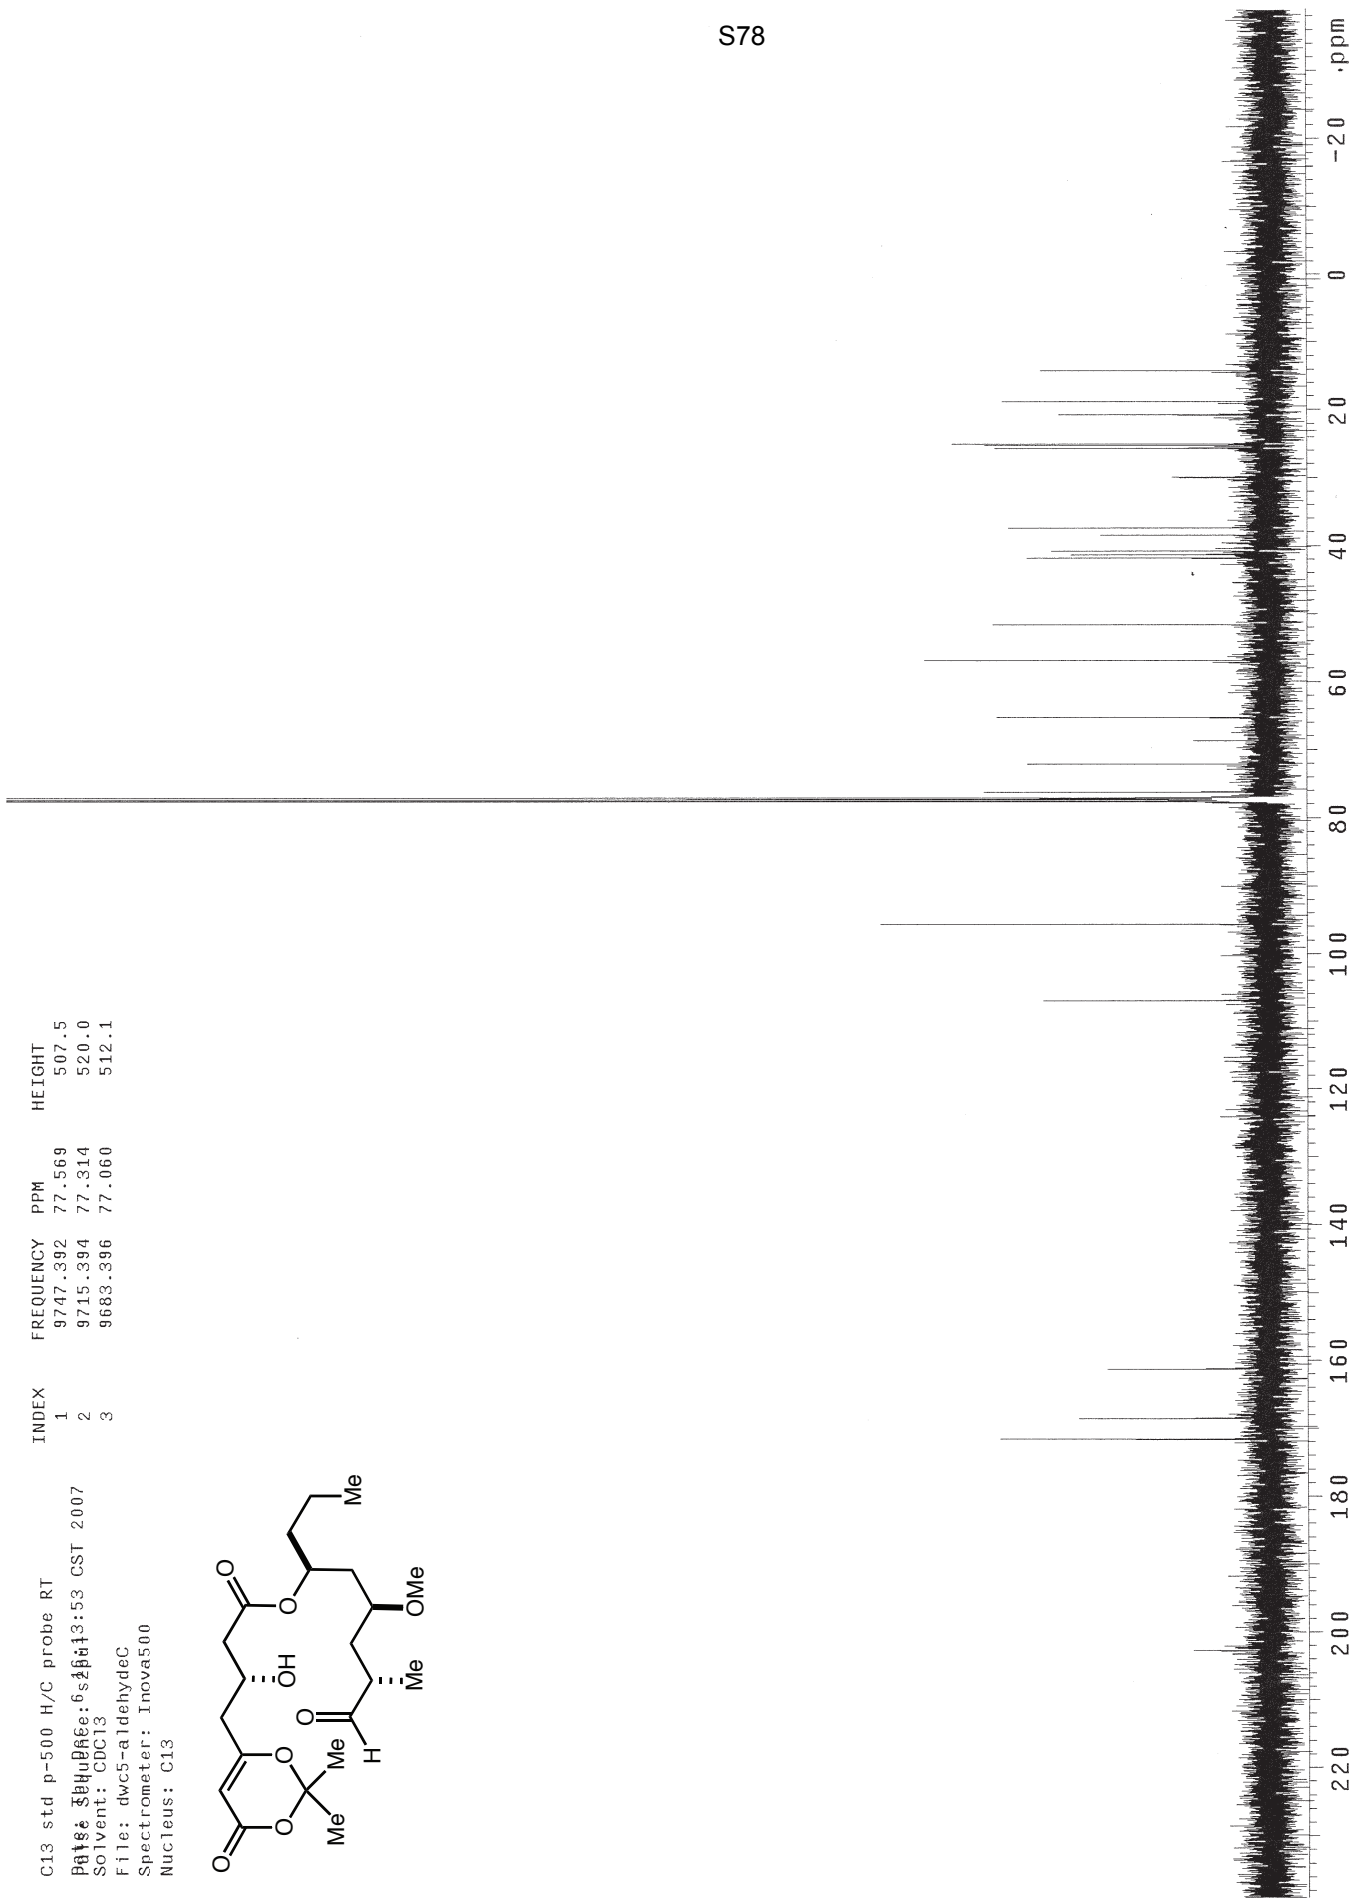

H1\_std P-inova500 H/C probe RT INDEX FREQUENCY PPM HEIGHT

Path: \\hpc\share\541639:53 CST 2007 1 -1501.212 -3.004 0.0

Solvent: CDCl3

File: dwc5-cyclizationh

Spectrometer: Inova500

Nucleus: H1

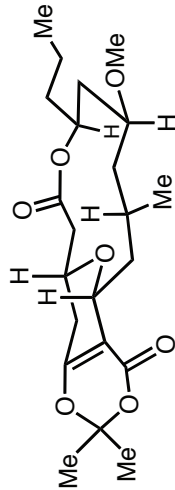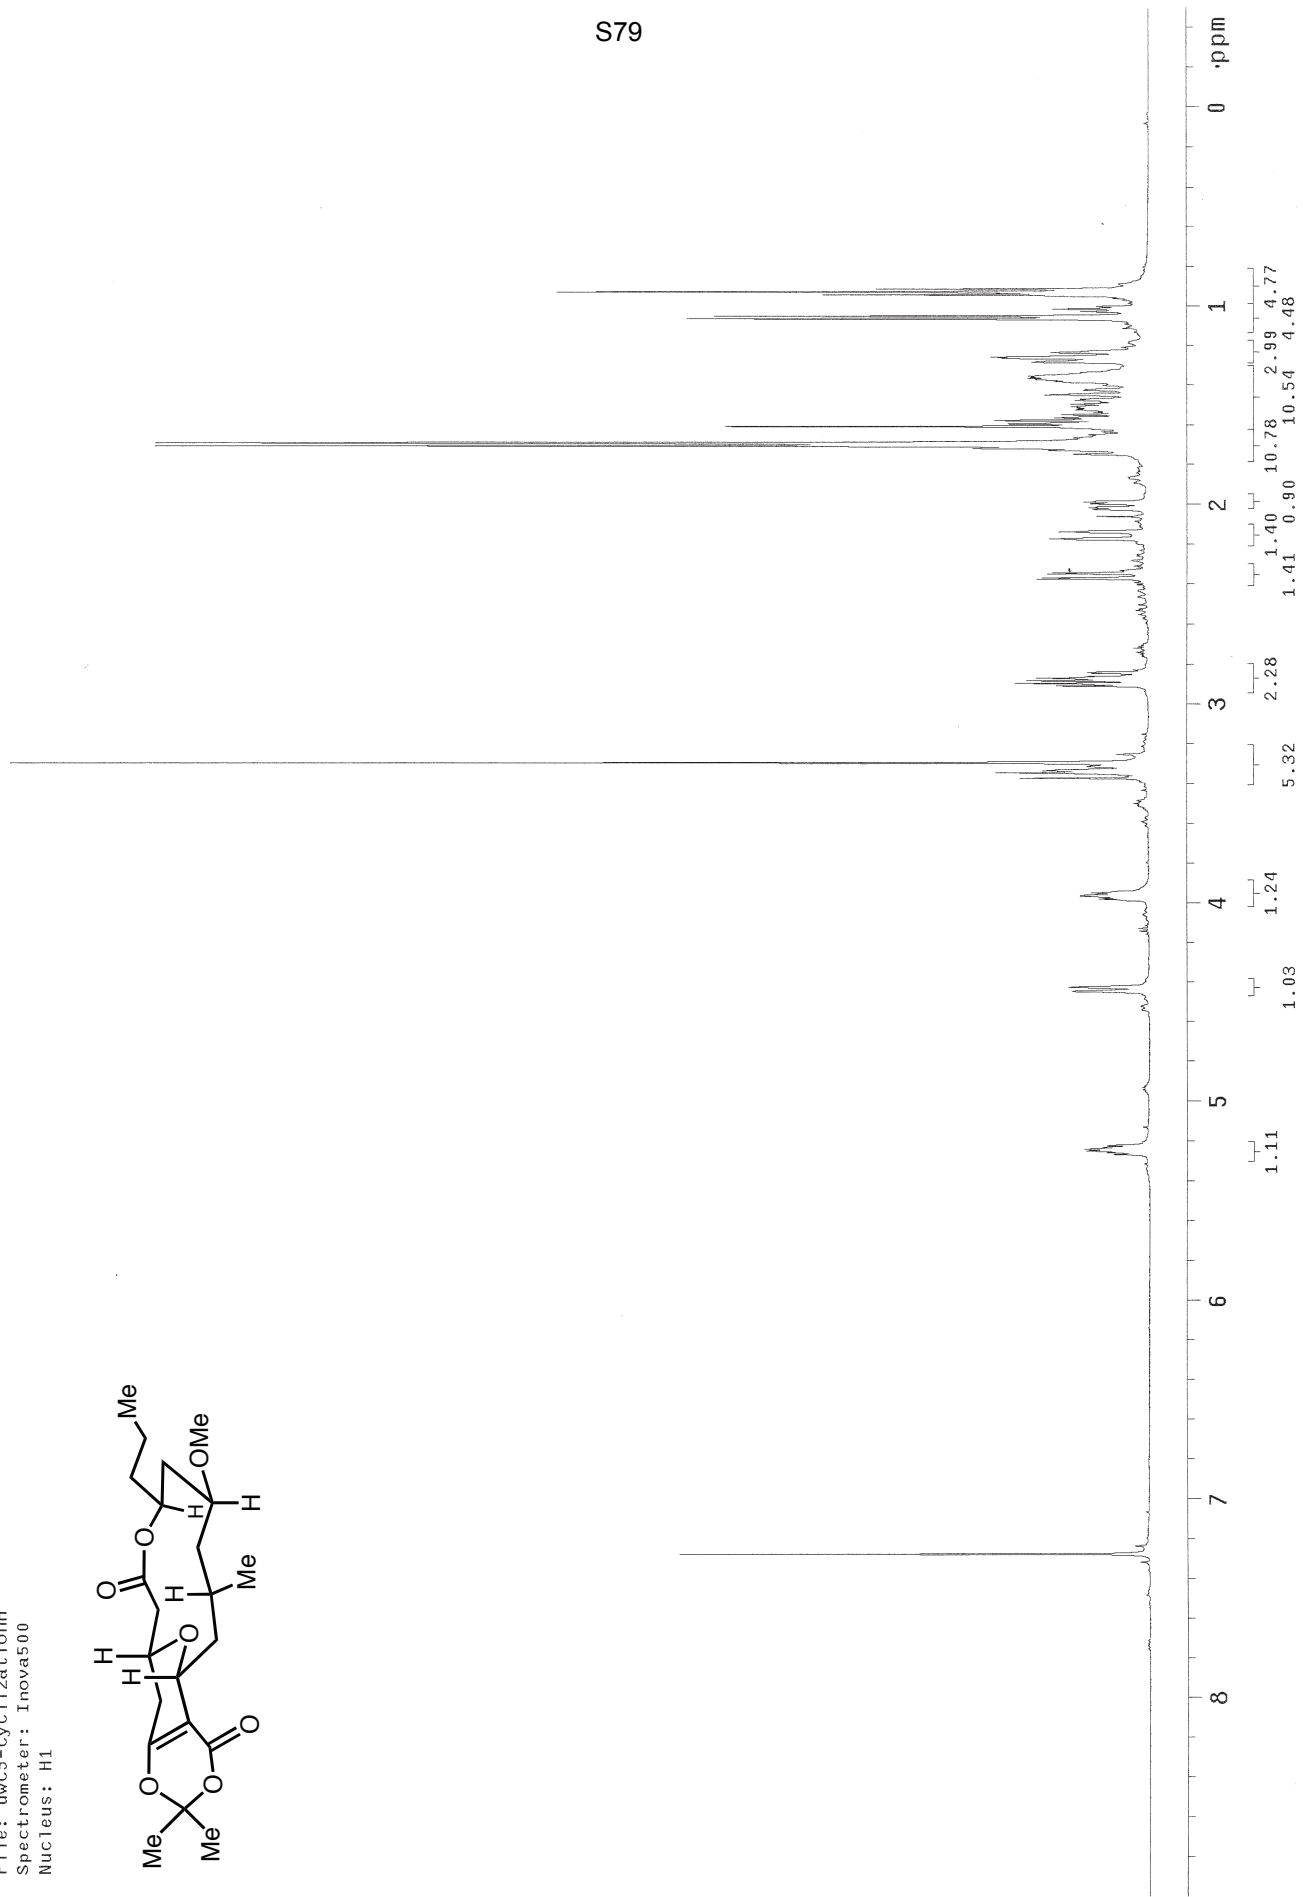

C13 std p-500 H/C probe RT  
Path: \\bbu\p\re:6s\140:52 CST 2007  
Solvent: CDCl3  
File: dwc5-cyclizationC  
Spectrometer: Inova500  
Nucleus: C13

| INDEX | FREQUENCY | PPM    | HEIGHT |
|-------|-----------|--------|--------|
| 1     | 9741.526  | 77.522 | 387.2  |
| 2     | 9709.528  | 77.268 | 400.7  |
| 3     | 9677.530  | 77.013 | 394.7  |

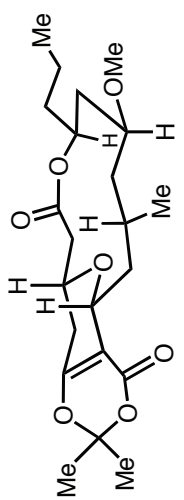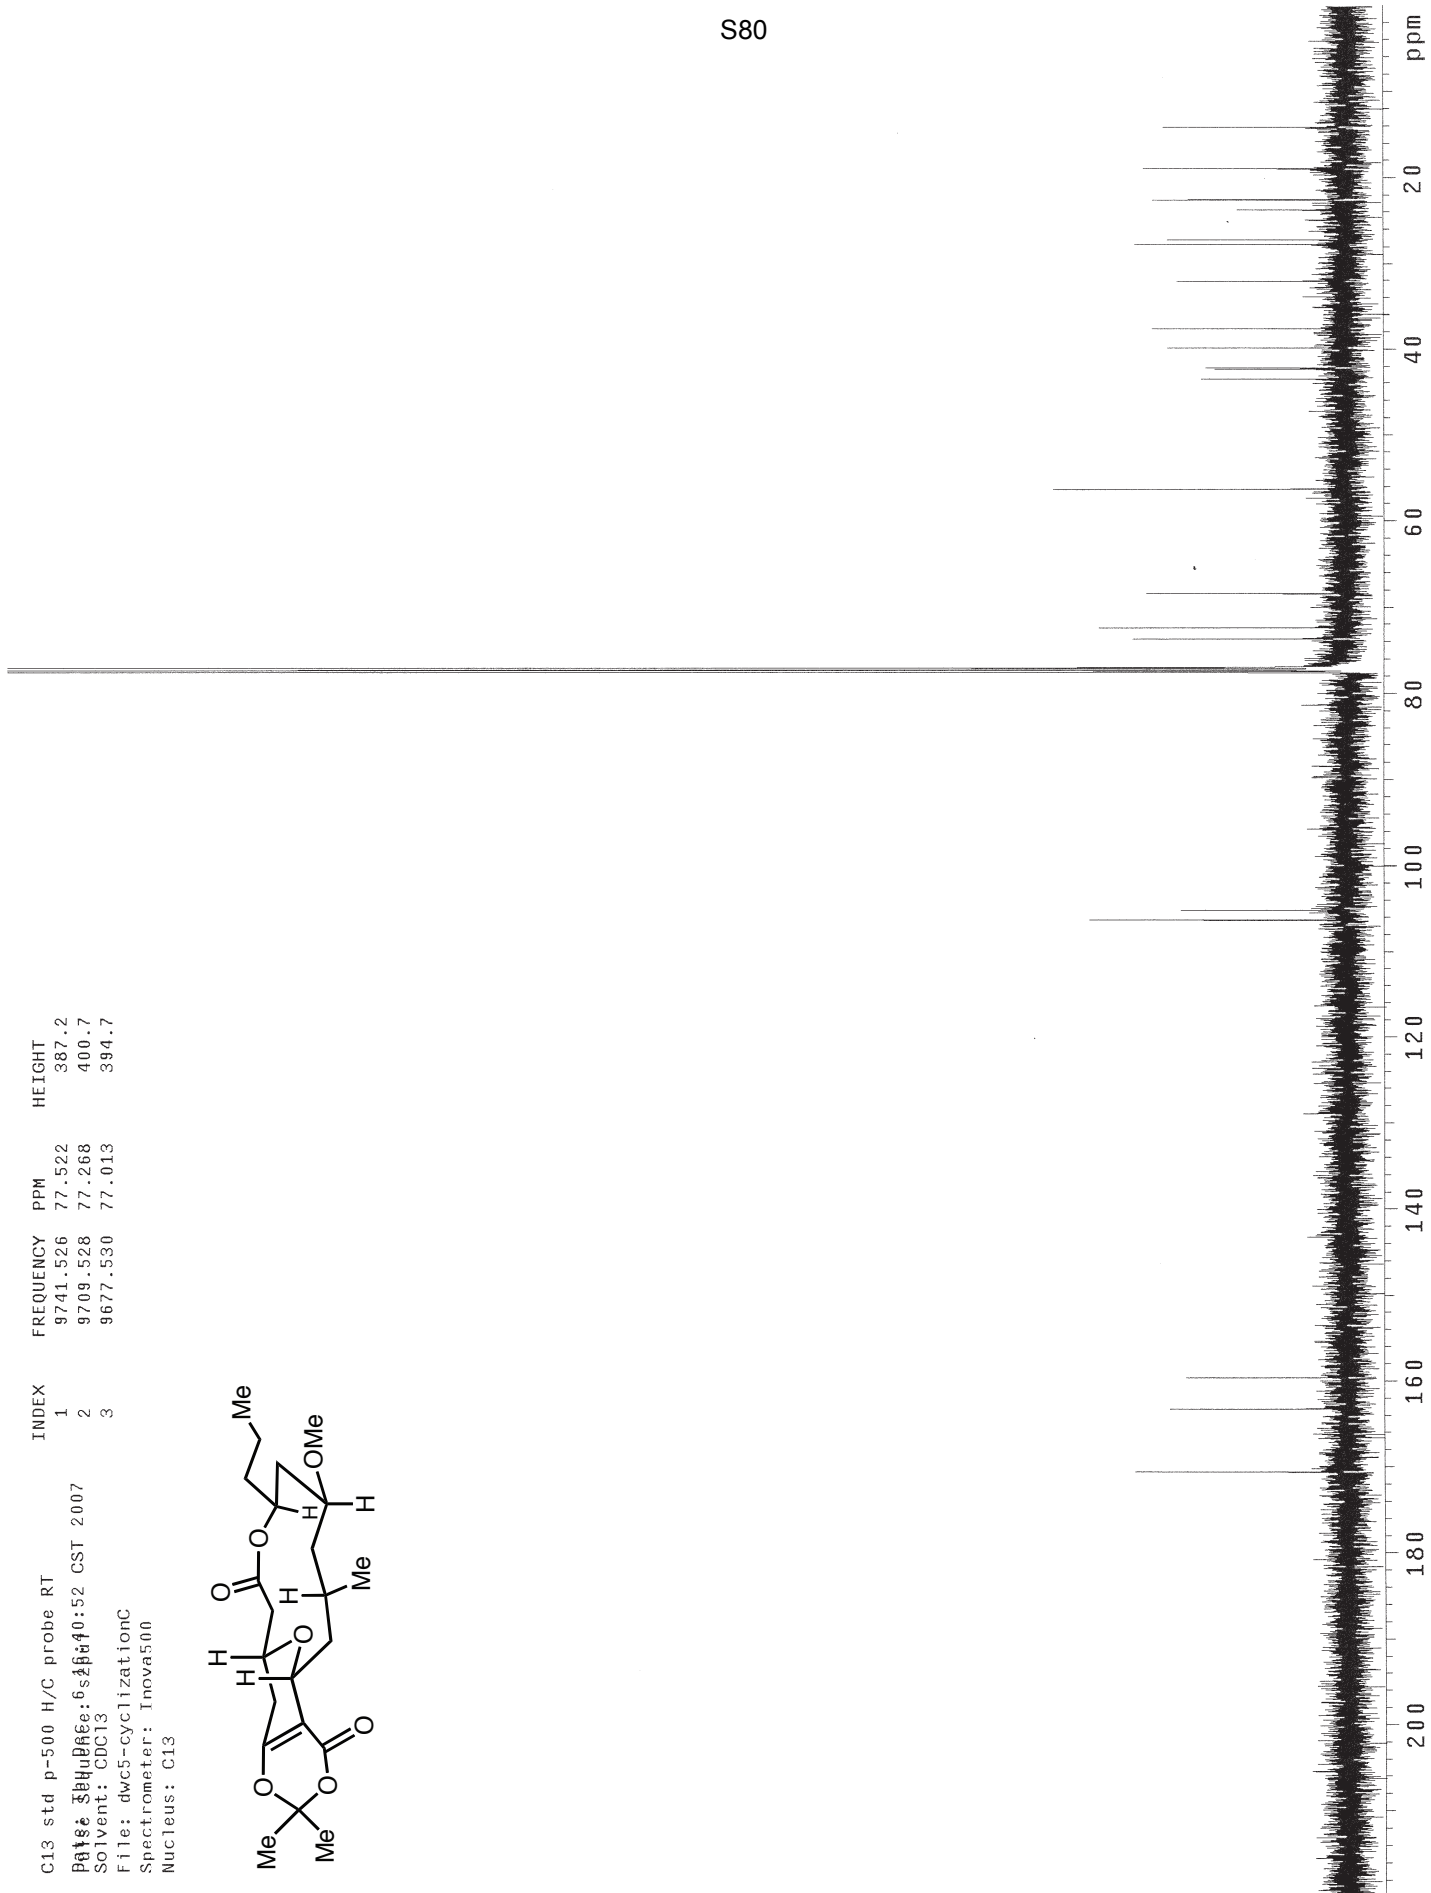



H1\_std P-inova500 H/C probe RT INDEX FREQUENCY PPM HEIGHT

17:00 CST 2007 1 -1501.212 -3.004 0.0

File: dmc5-pyranoneH  
Spectrometer: Inova500  
Nucleus: H1

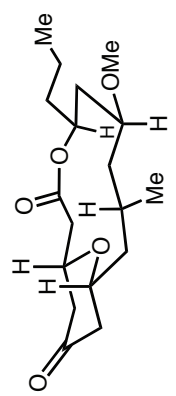

S81

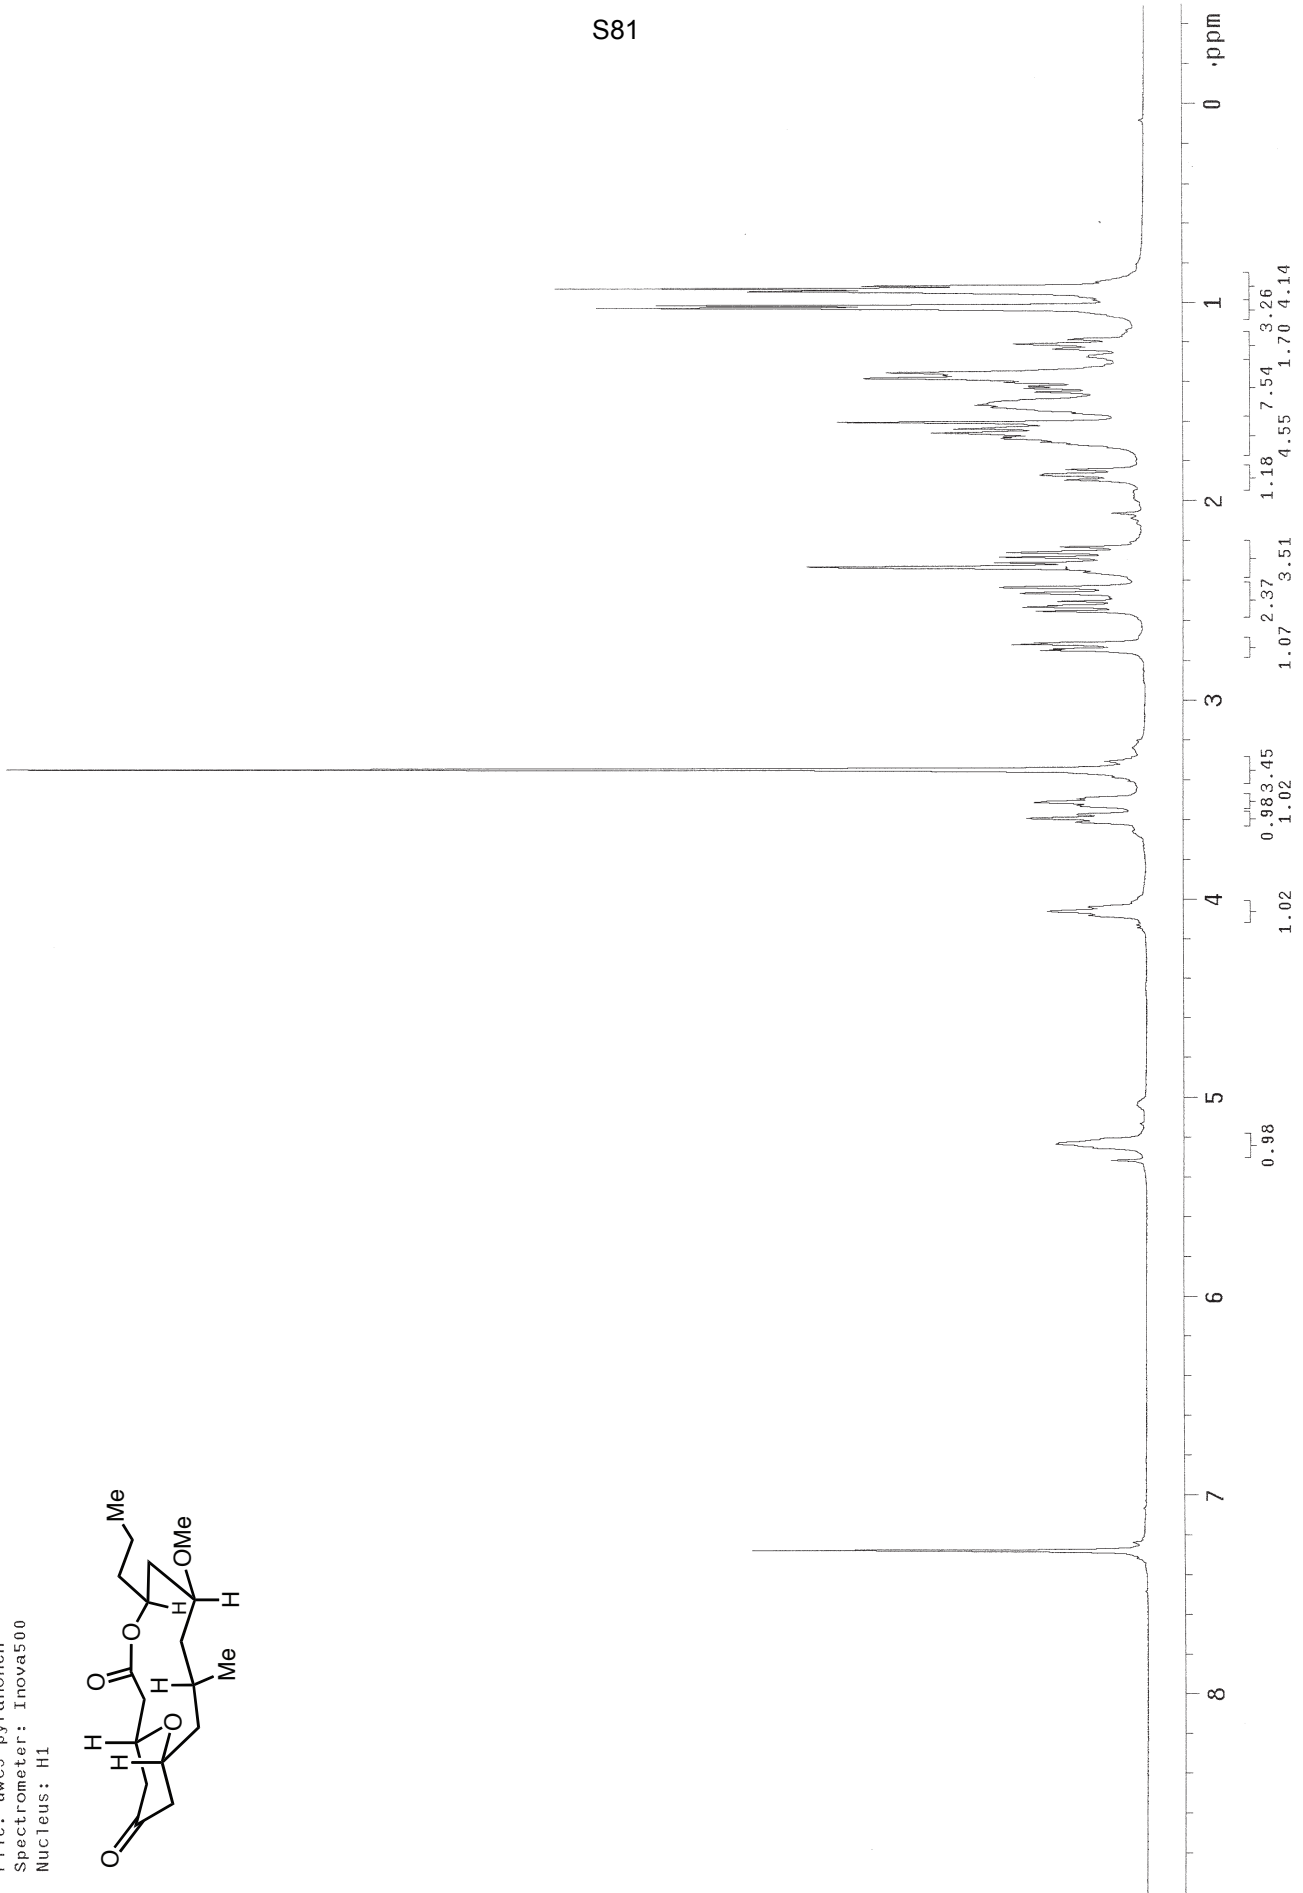

| INDEX | FREQUENCY | PPM    | HEIGHT |
|-------|-----------|--------|--------|
| 1     | 9741.526  | 77.522 | 331.7  |
| 2     | 9710.061  | 77.272 | 341.9  |
| 3     | 9678.063  | 77.017 | 339.3  |

C13 std p-500 H/C probe RT  
Path: \\bbu\p\re:6s\17:56 CST 2007  
Solvent: CDCl3  
File: dwc5-pyranoneC  
Spectrometer: Inova500  
Nucleus: C13

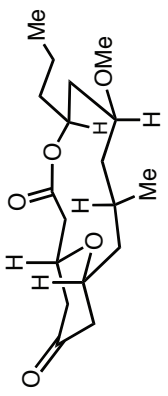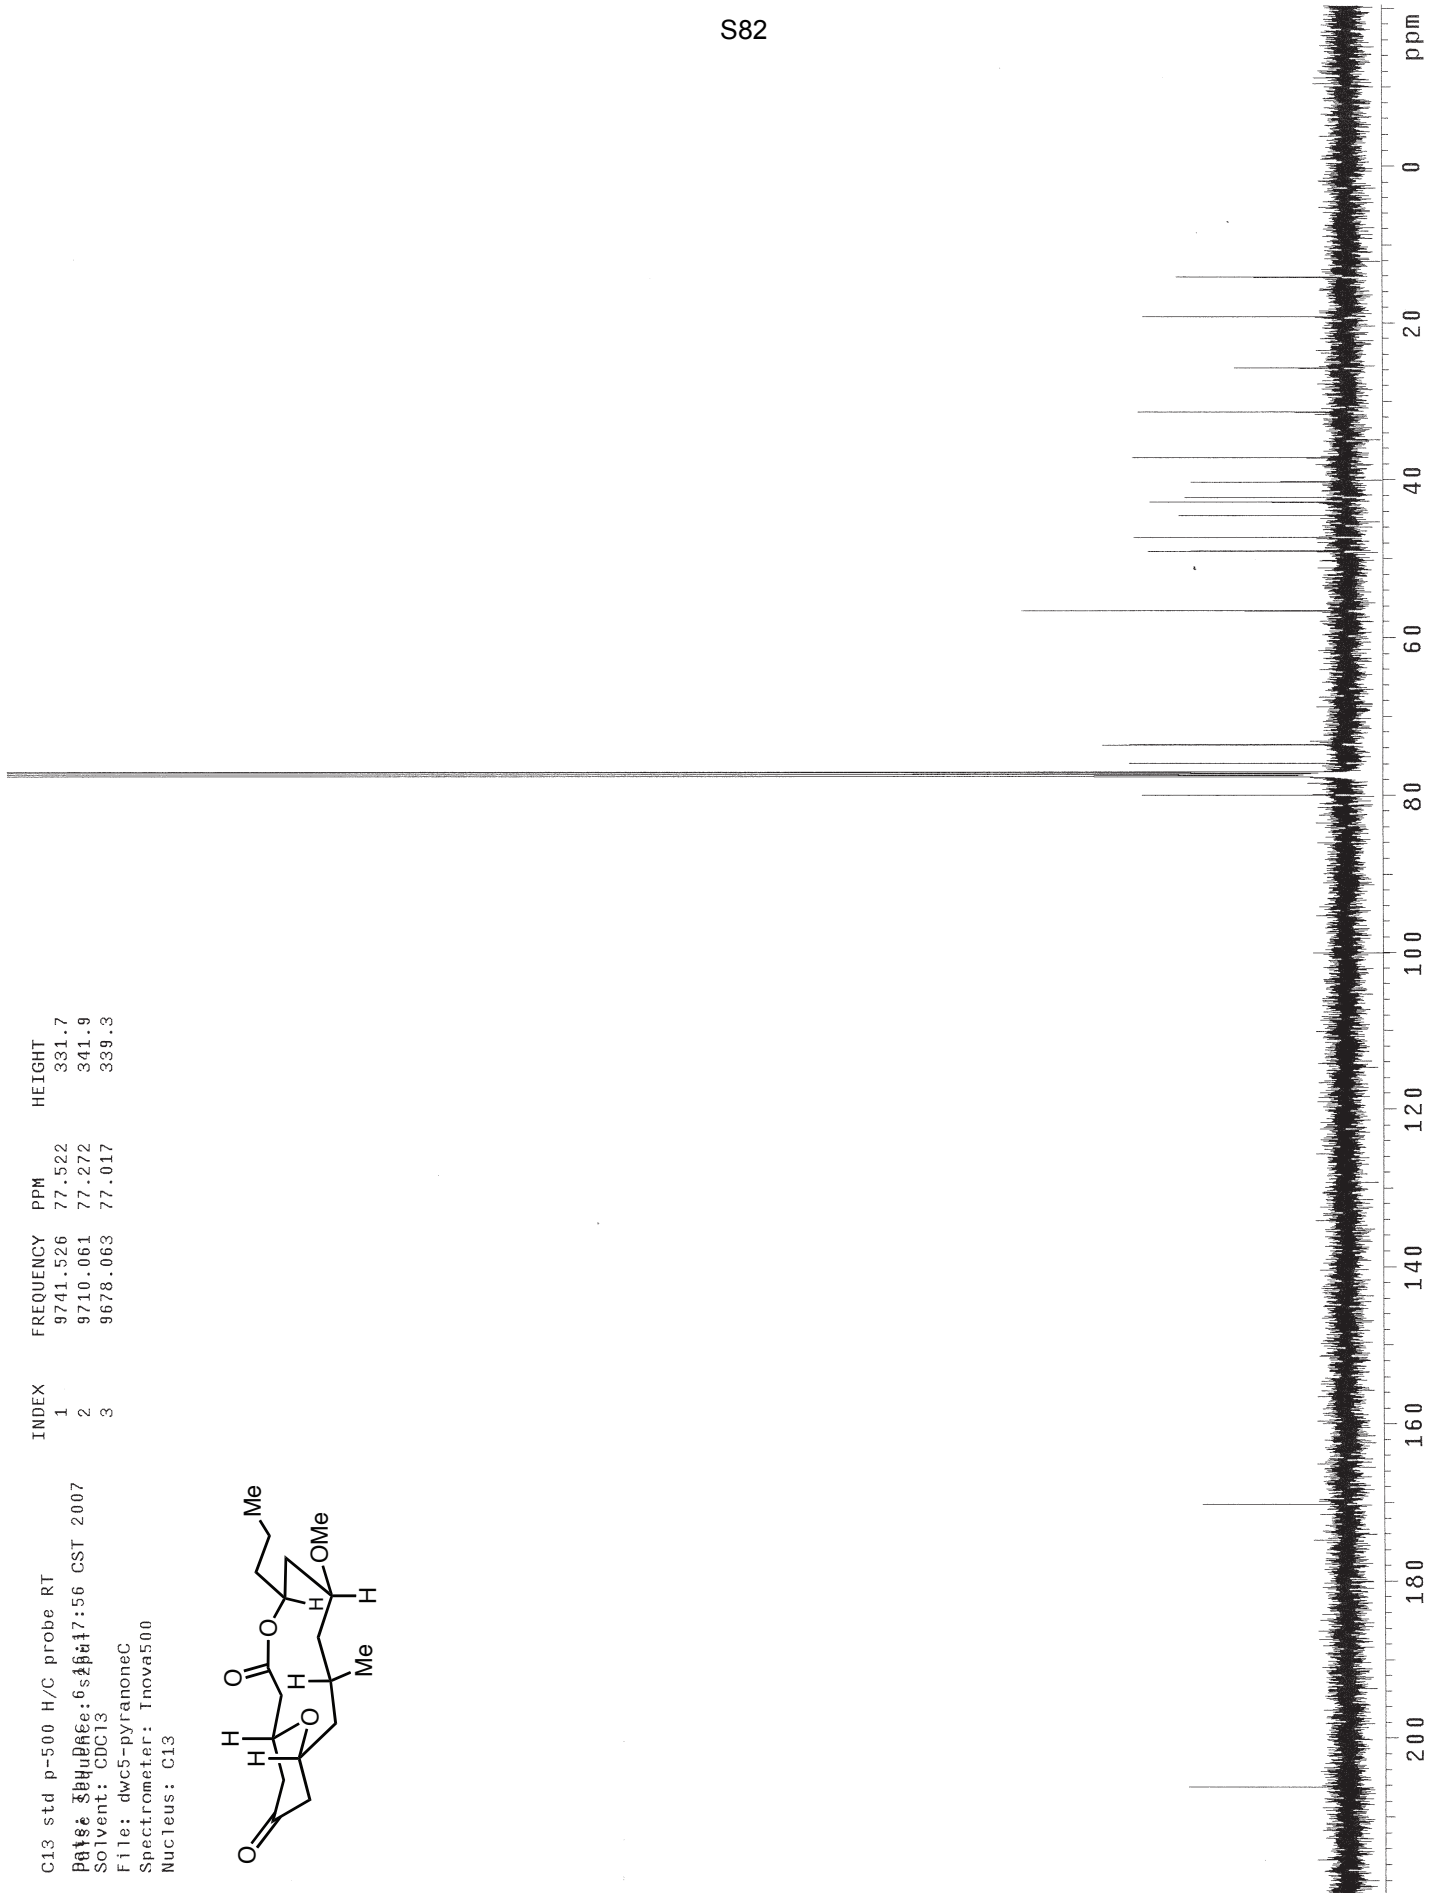

H1\_std P-inova500 H/C probe RT  
 Index 1  
 Frequency PPM -1501.212 -3.004  
 Height 0.0  
 File: dmc5-pyranH  
 Solvent: CDCl3  
 Spectrometer: Inova500  
 Nucleus: H1

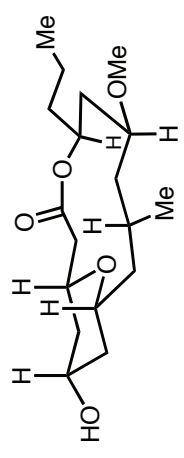

S83

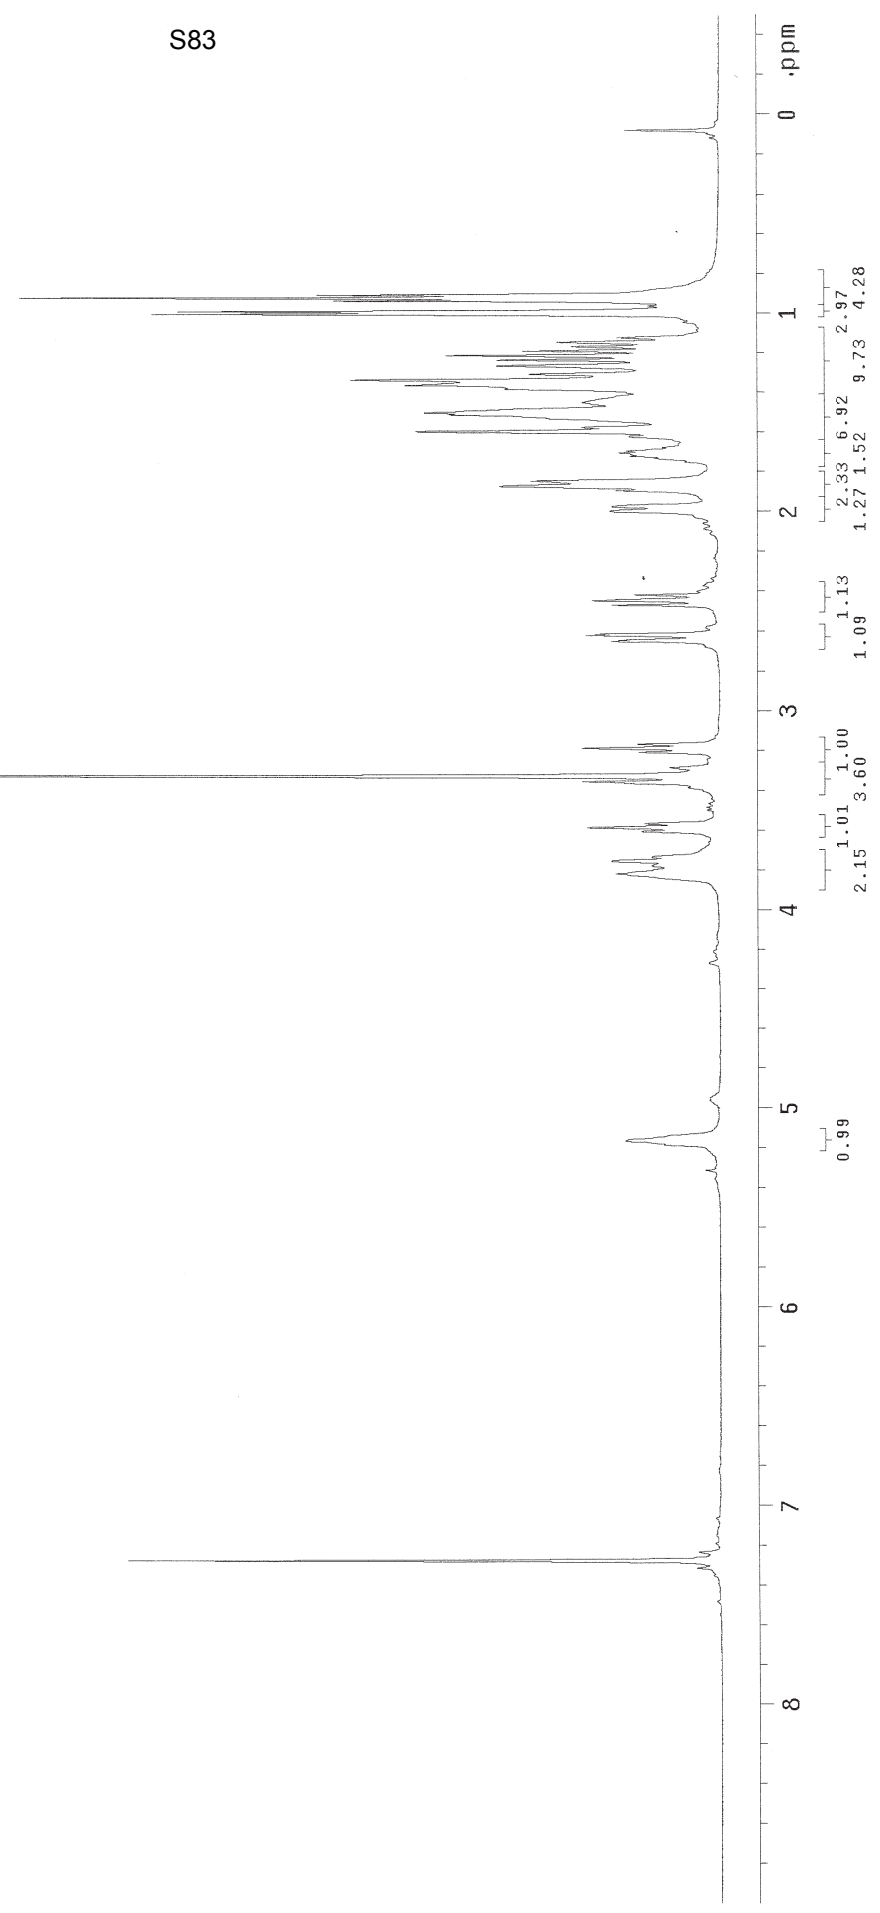

C13 std p-500 H/C probe RT  
Path: S:\Data\6s\19:40 CST 2007  
Solvent: CDCl3  
File: dwc5-pyranC  
Spectrometer: Inova500  
Nucleus: C13

| INDEX | FREQUENCY | PPM    | HEIGHT |
|-------|-----------|--------|--------|
| 1     | 9740.993  | 77.518 | 656.7  |
| 2     | 9708.995  | 77.263 | 671.9  |
| 3     | 9676.997  | 77.009 | 665.6  |

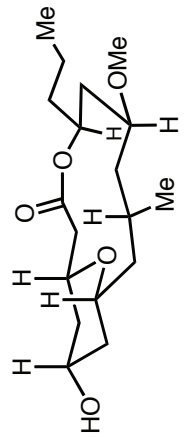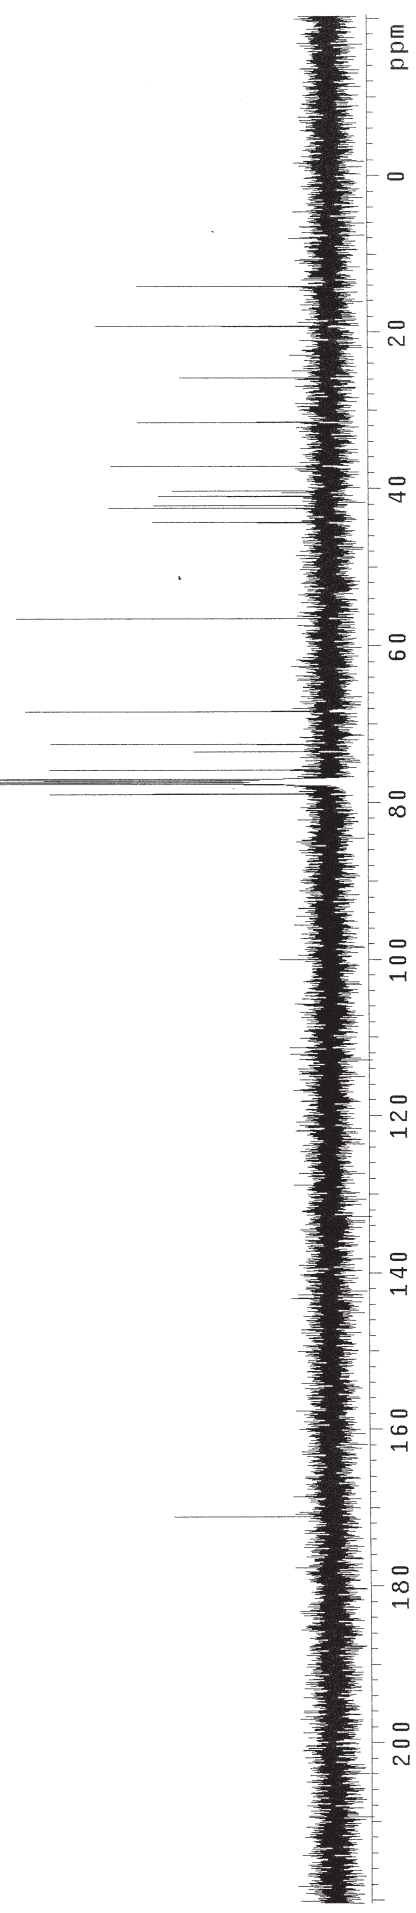

1H LINESHAPE  
 1% CHCl3 (88)  
 Date: Thu Dec  
 8 17:25:00  
 File: dmc5-neopeltolide600  
 Spectrometer: Inova500  
 Nucleus: H1

| INDEX | FREQUENCY | PPM   | HEIGHT |
|-------|-----------|-------|--------|
| 1     | 2920.935  | 4.870 | 190.9  |
| 2     | 1974.750  | 3.292 | 203.8  |

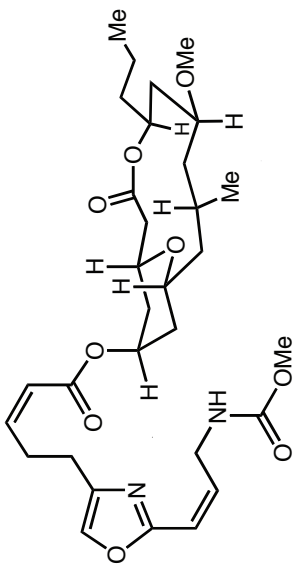

synthetic neopeltolide (1)  
 600 MHz, CD3OD

S85

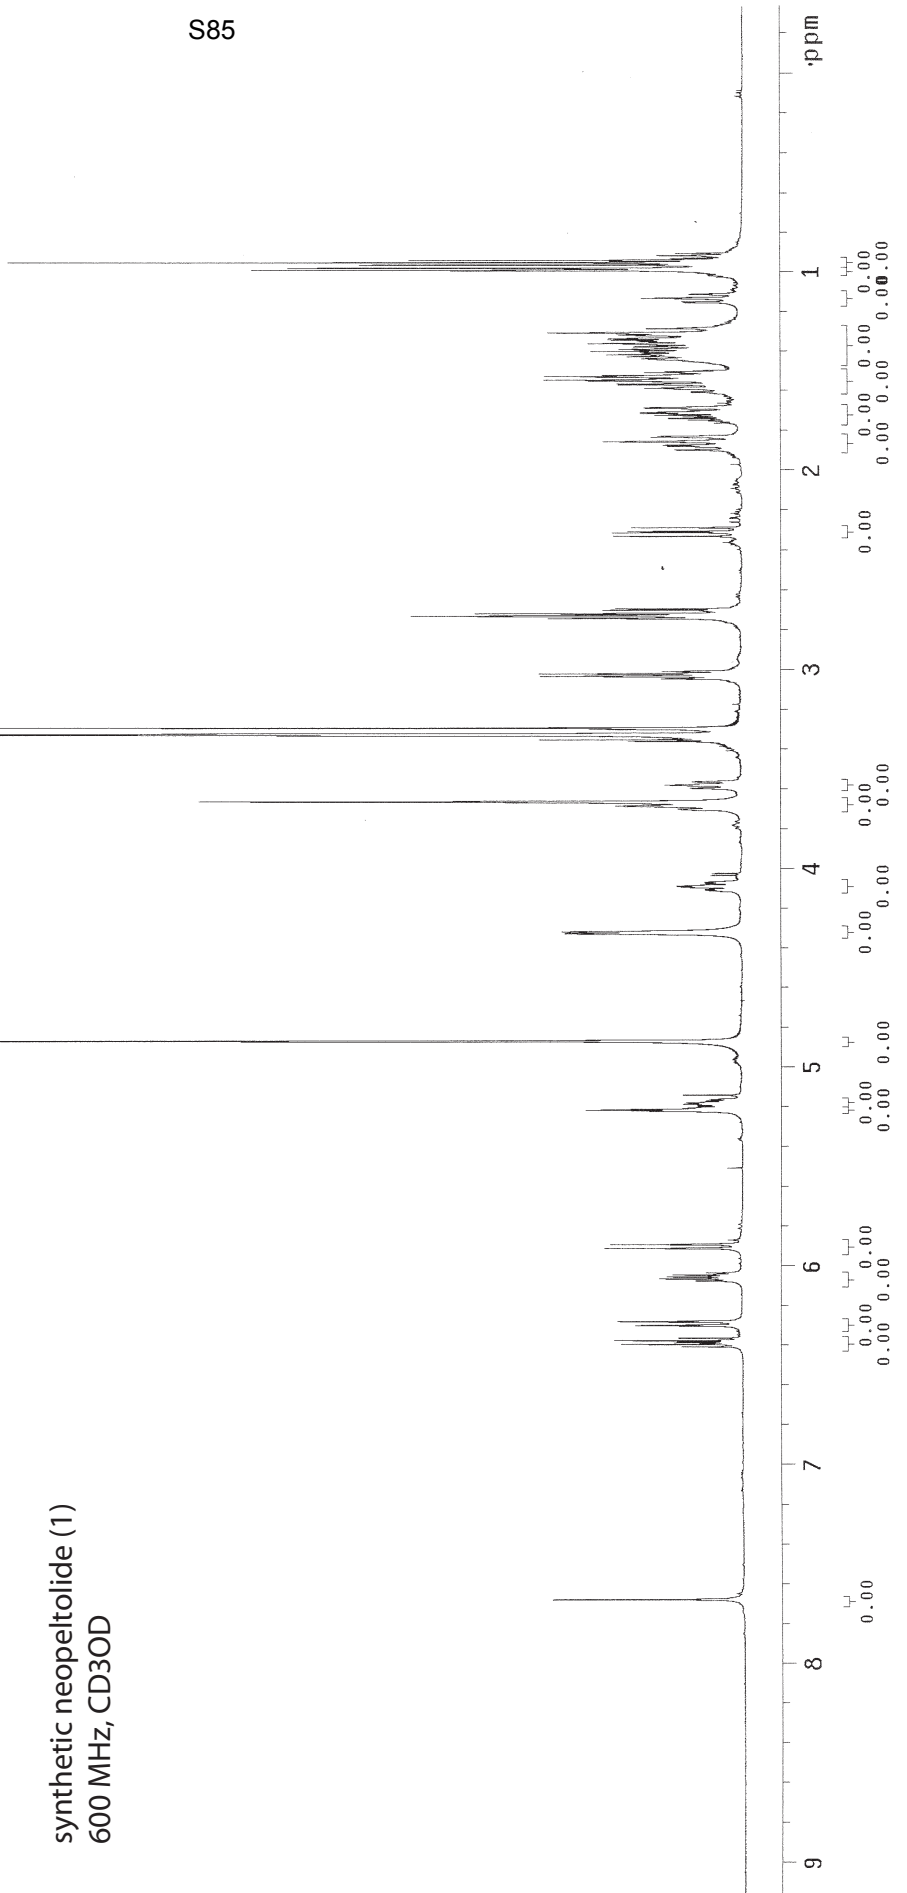

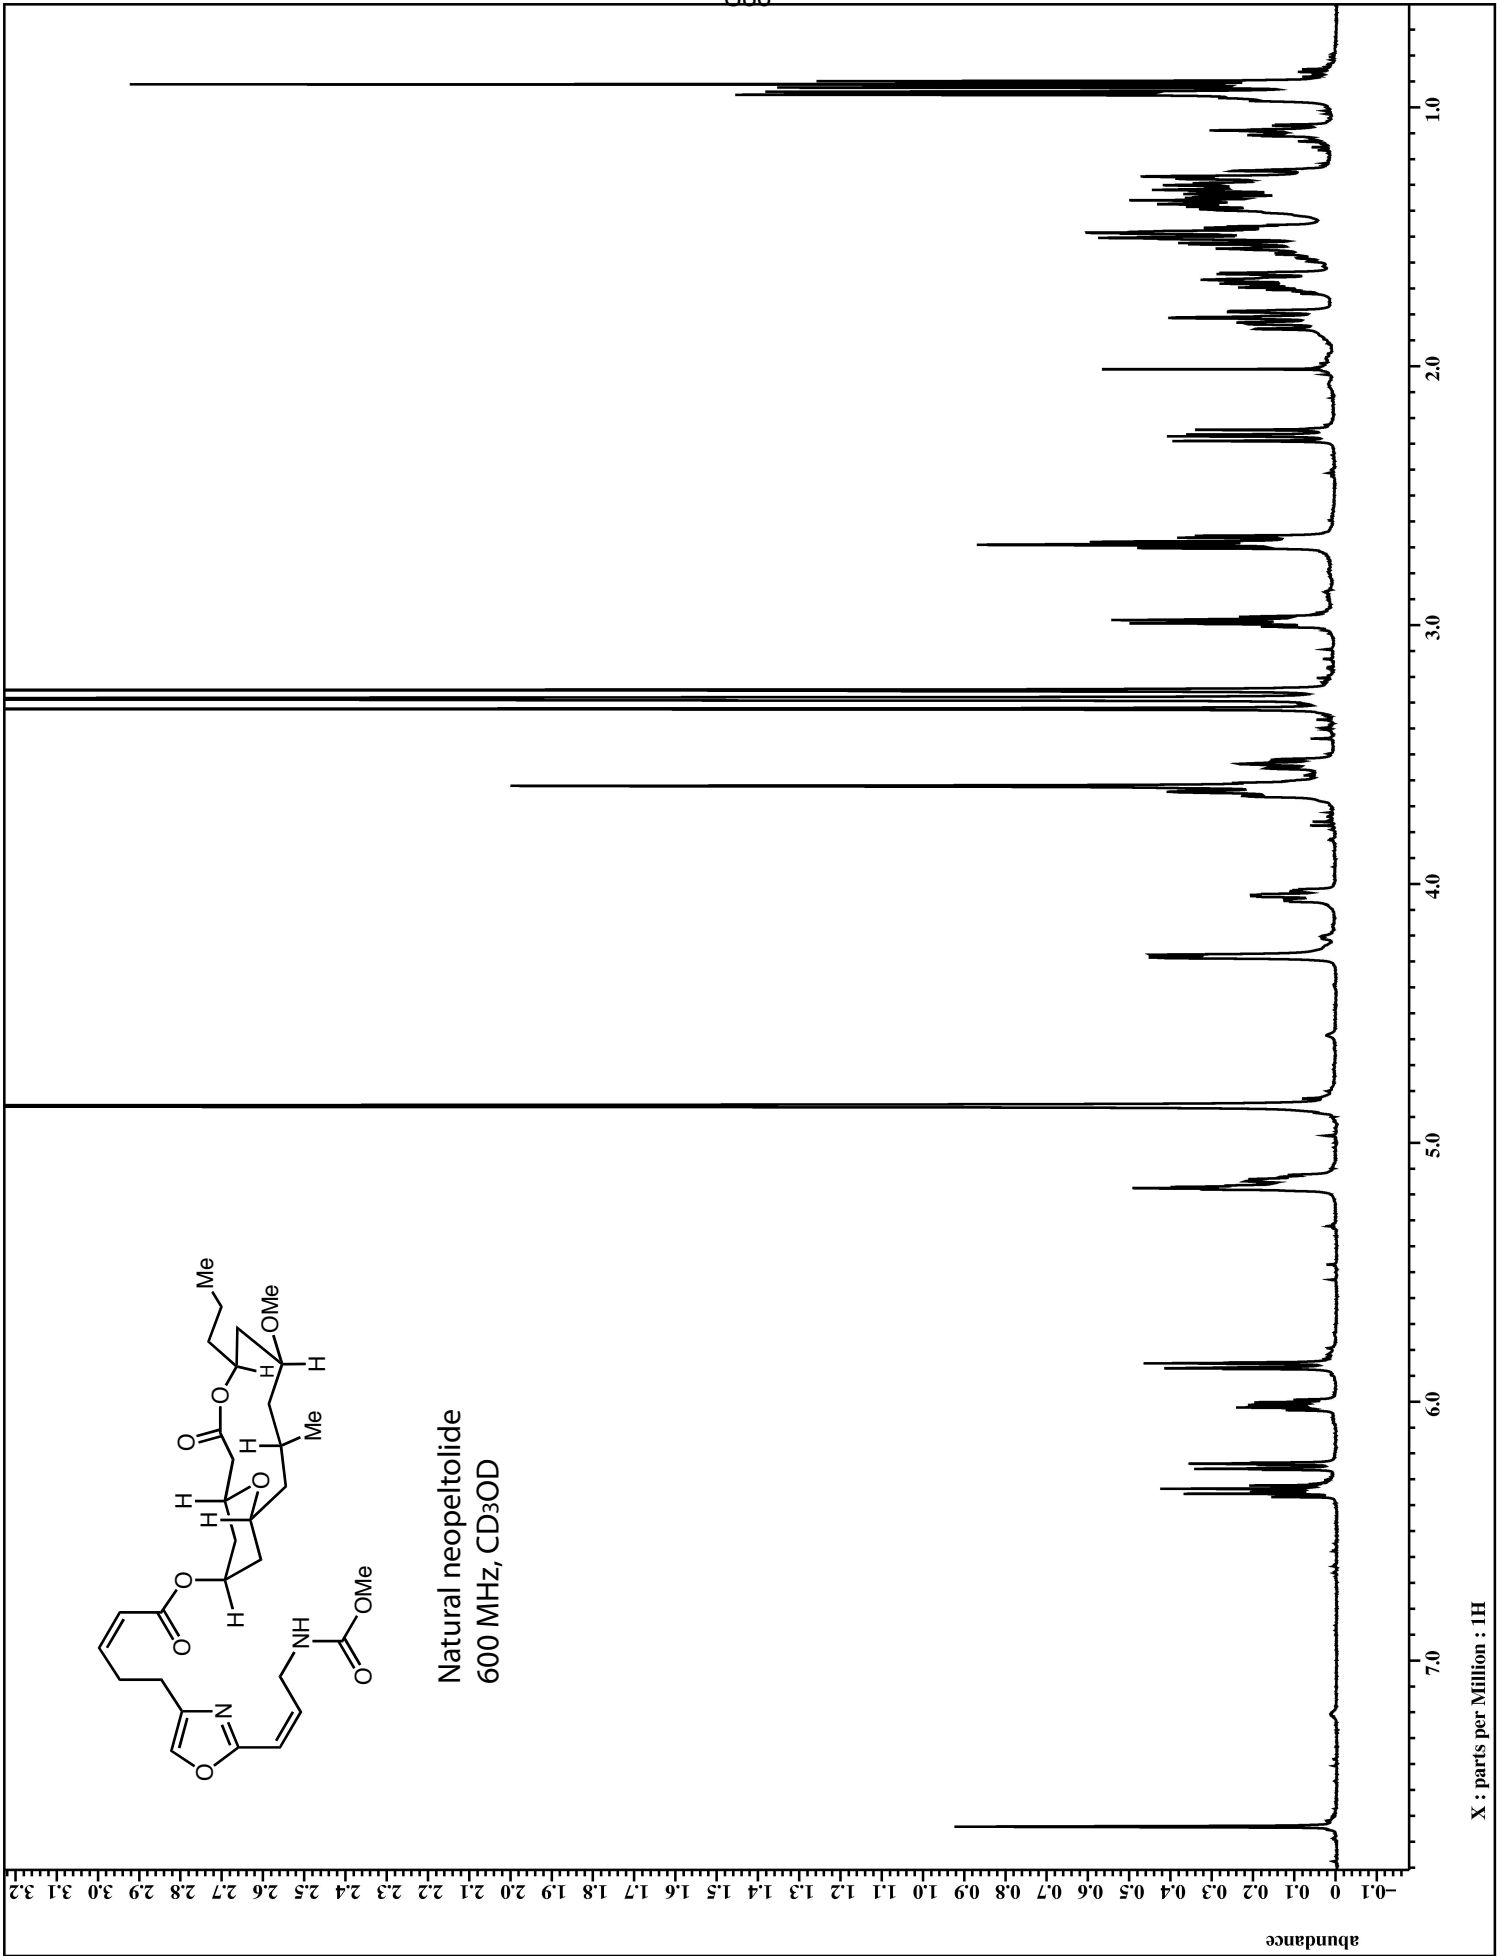

1H LINESHAPE  
1% CHCl3 (89)  
Date: Fri Dec  
8 17:49:13 CST 2007  
Solvent: CD3OD  
File: dmc5-neopeltolide600  
Spectrometer: Inova500  
Nucleus: H1

| INDEX | FREQUENCY PPM | HEIGHT |
|-------|---------------|--------|
| 1     | -201.952      | -0.337 |
|       |               | 0.0    |

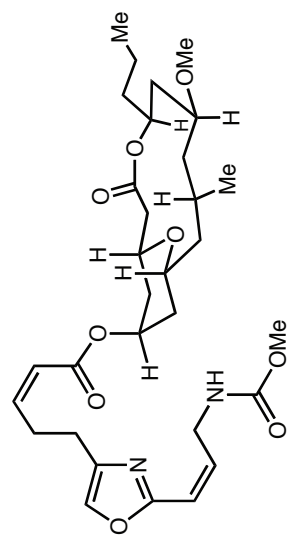

Synthetic neopeltolide (1)  
600 MHz, CD3OD

S87

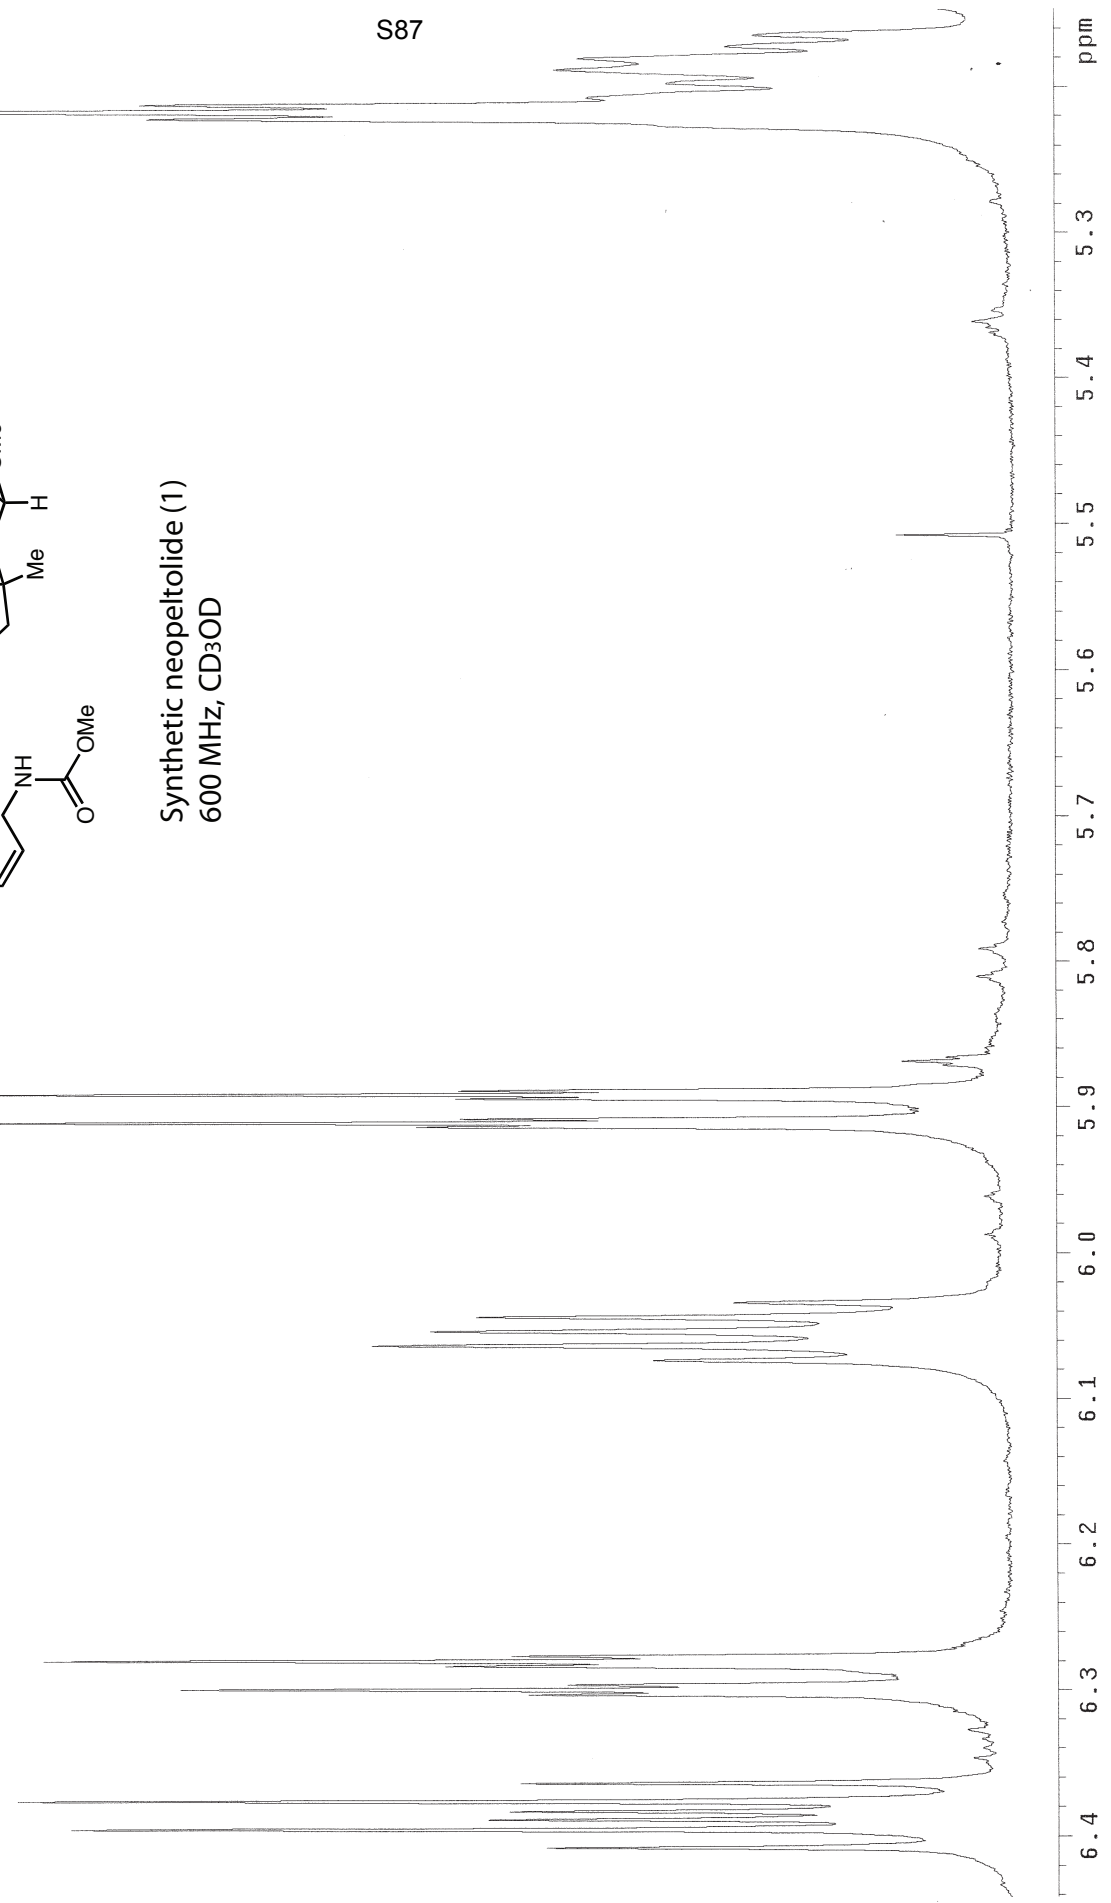

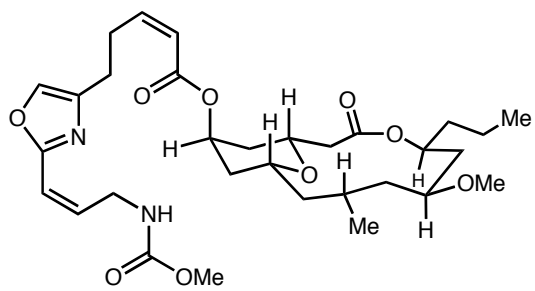

Natural neopeltolide  
600 MHz, CD<sub>3</sub>OD

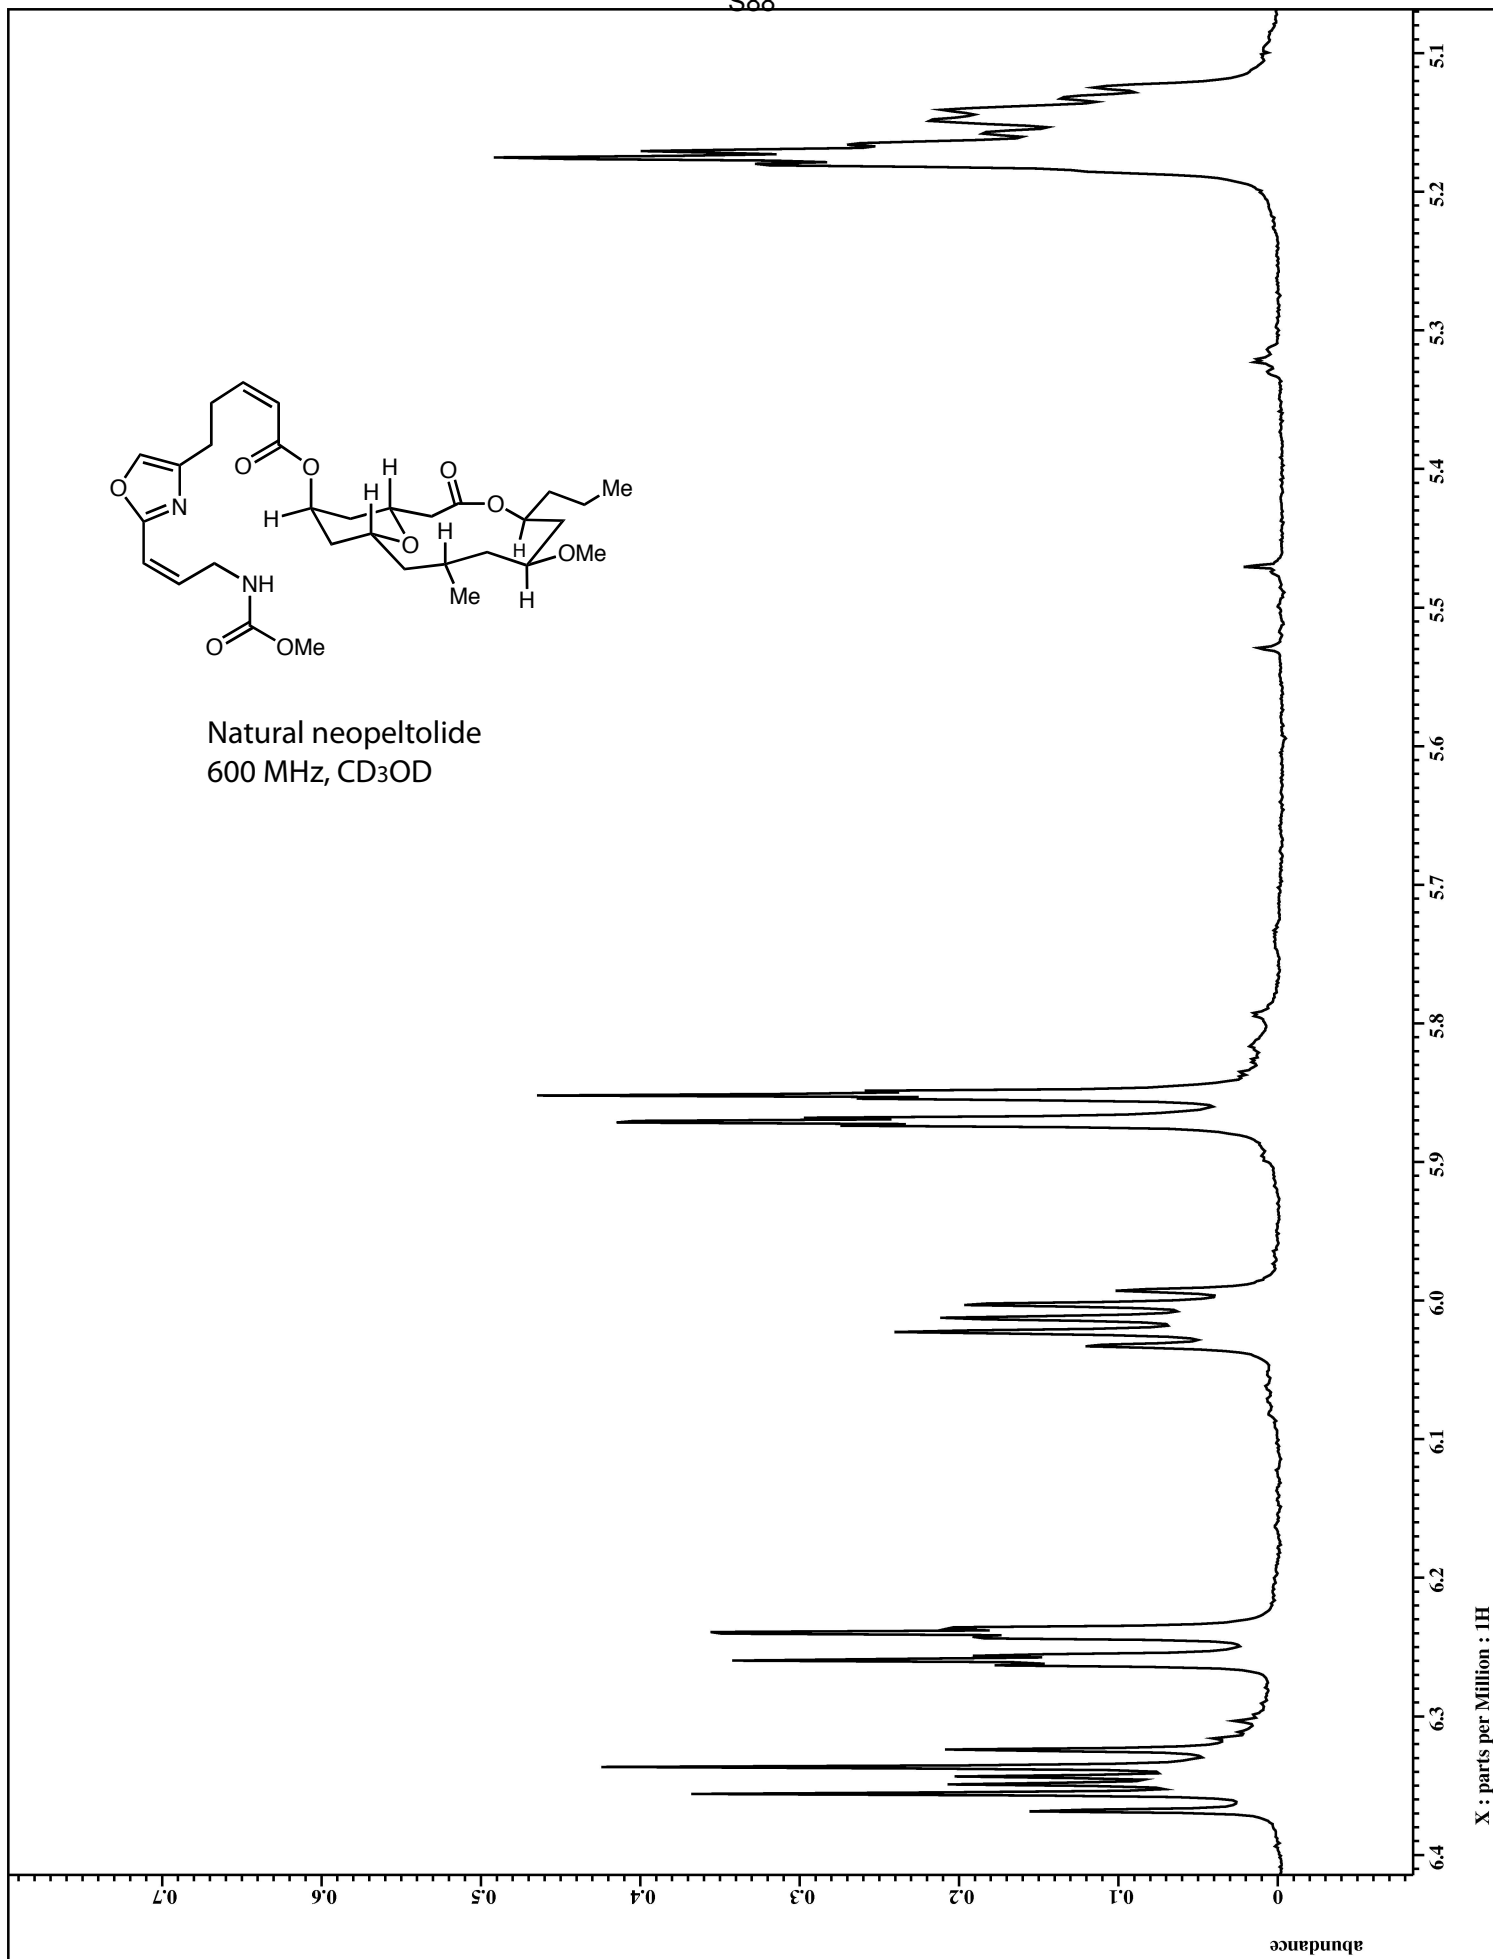

X : parts per Million : 1H

abundance



| INDEX | FREQUENCY | PPM   | HEIGHT |
|-------|-----------|-------|--------|
| 1     | 1996.720  | 3.329 | 290.3  |
| 2     | 1995.072  | 3.326 | 383.7  |
| 3     | 1993.425  | 3.324 | 261.4  |
| 4     | 1974.750  | 3.292 | 500.3  |

1H LINESHAPE  
 1% CHCl<sub>3</sub> (89)  
 Date: Fri Dec 7 17:51:10 CST 2007  
 Solvent: CDCl<sub>3</sub>  
 File: dmc5-neopeltolide600  
 Spectrometer: Inova500  
 Nucleus: H1

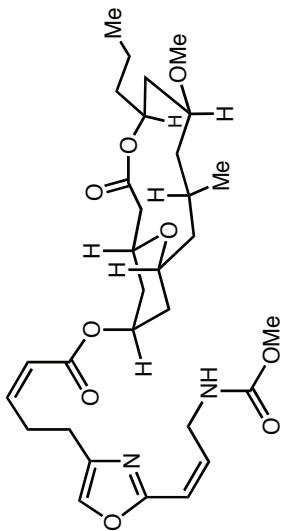

Synthetic neopeltolide (1)  
 600 MHz, CD<sub>3</sub>OD

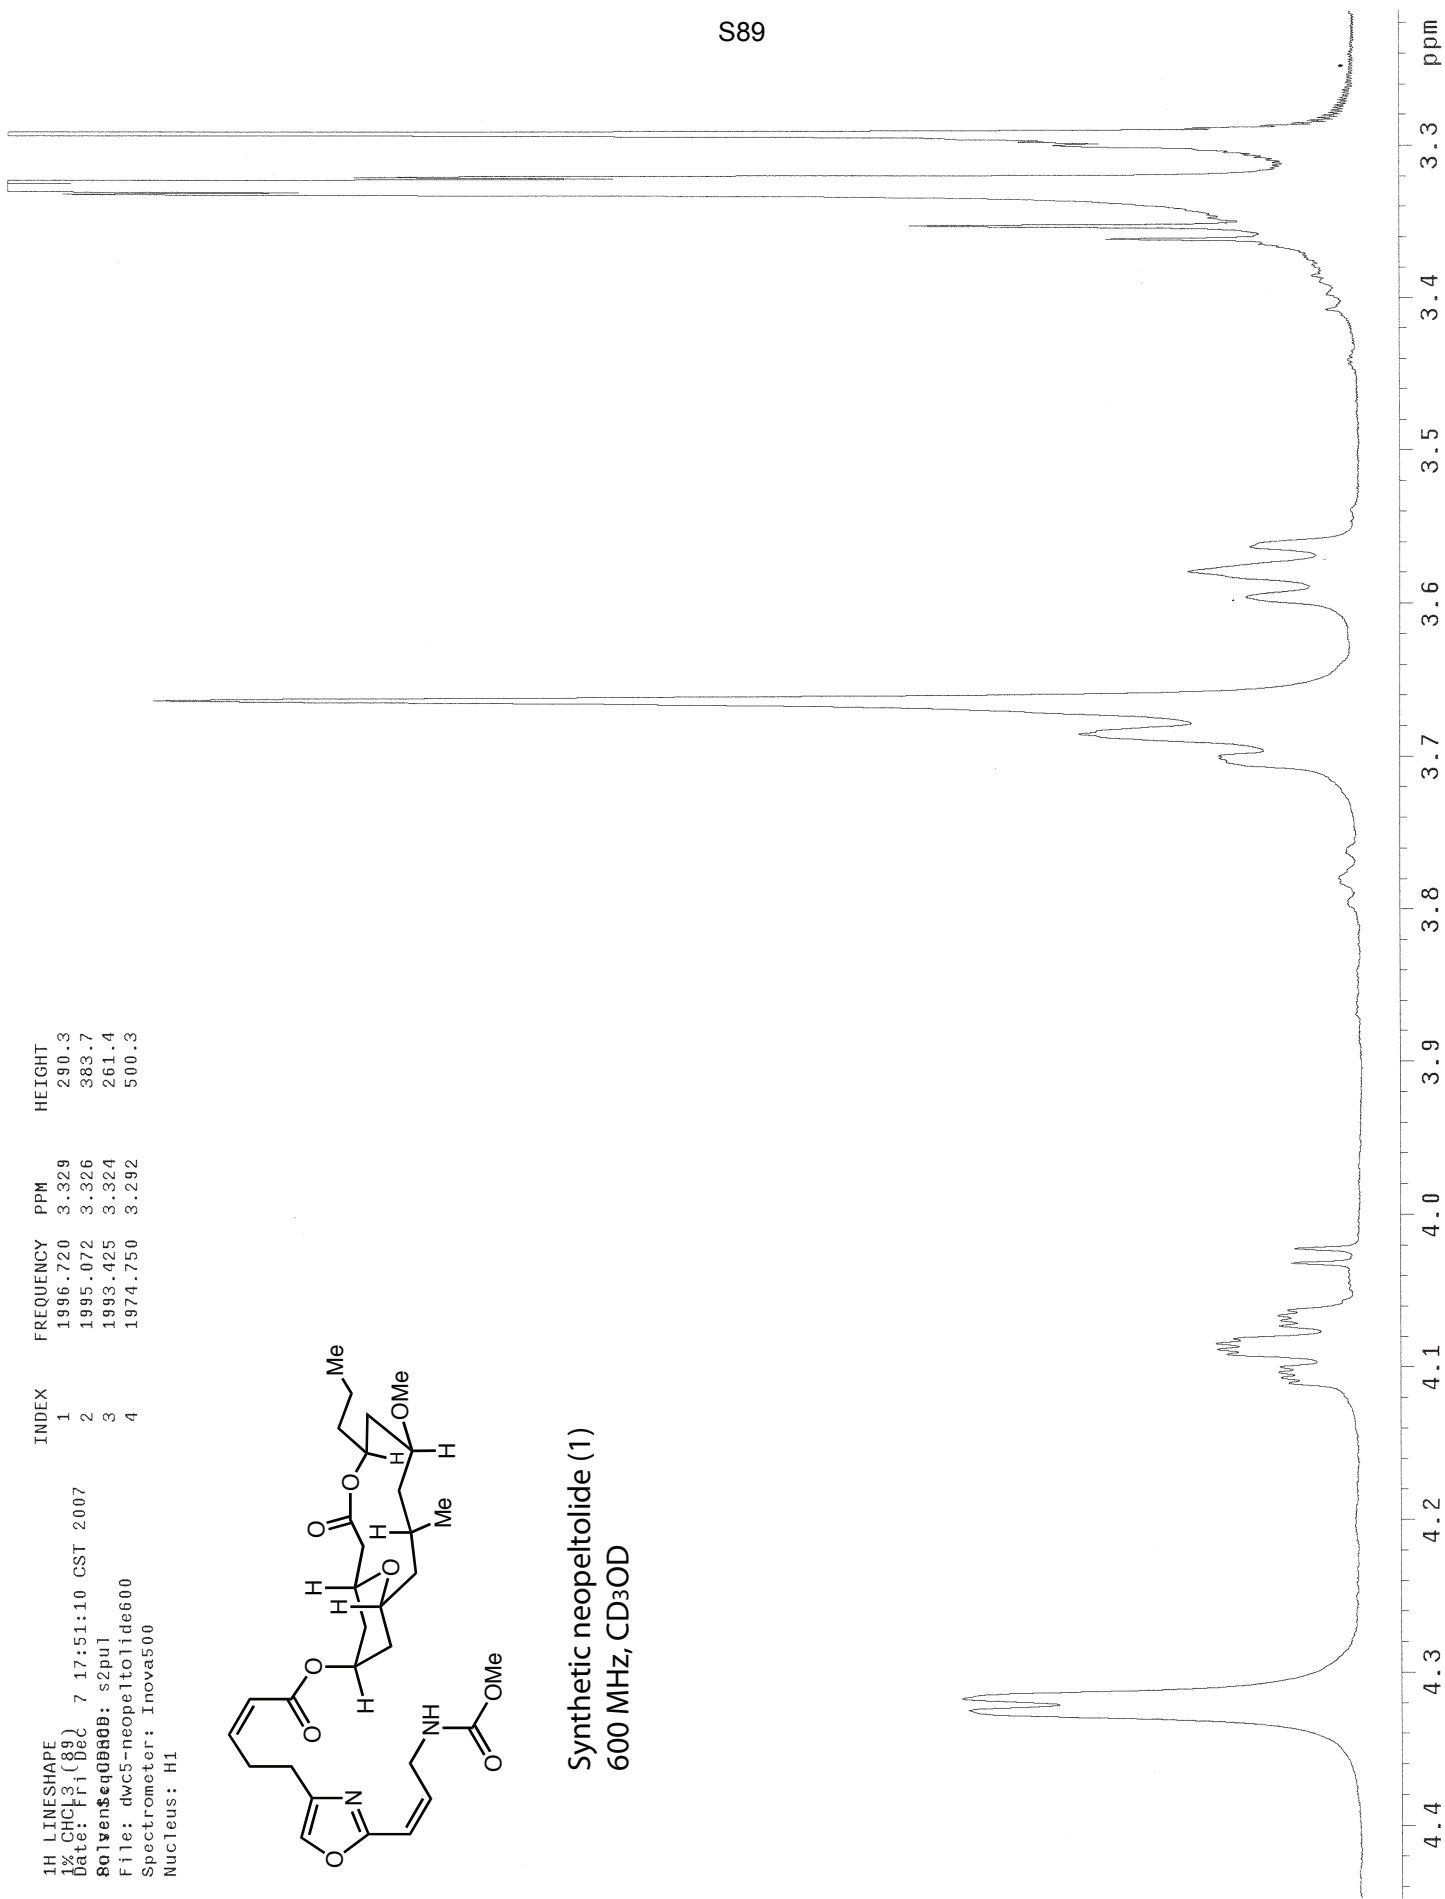

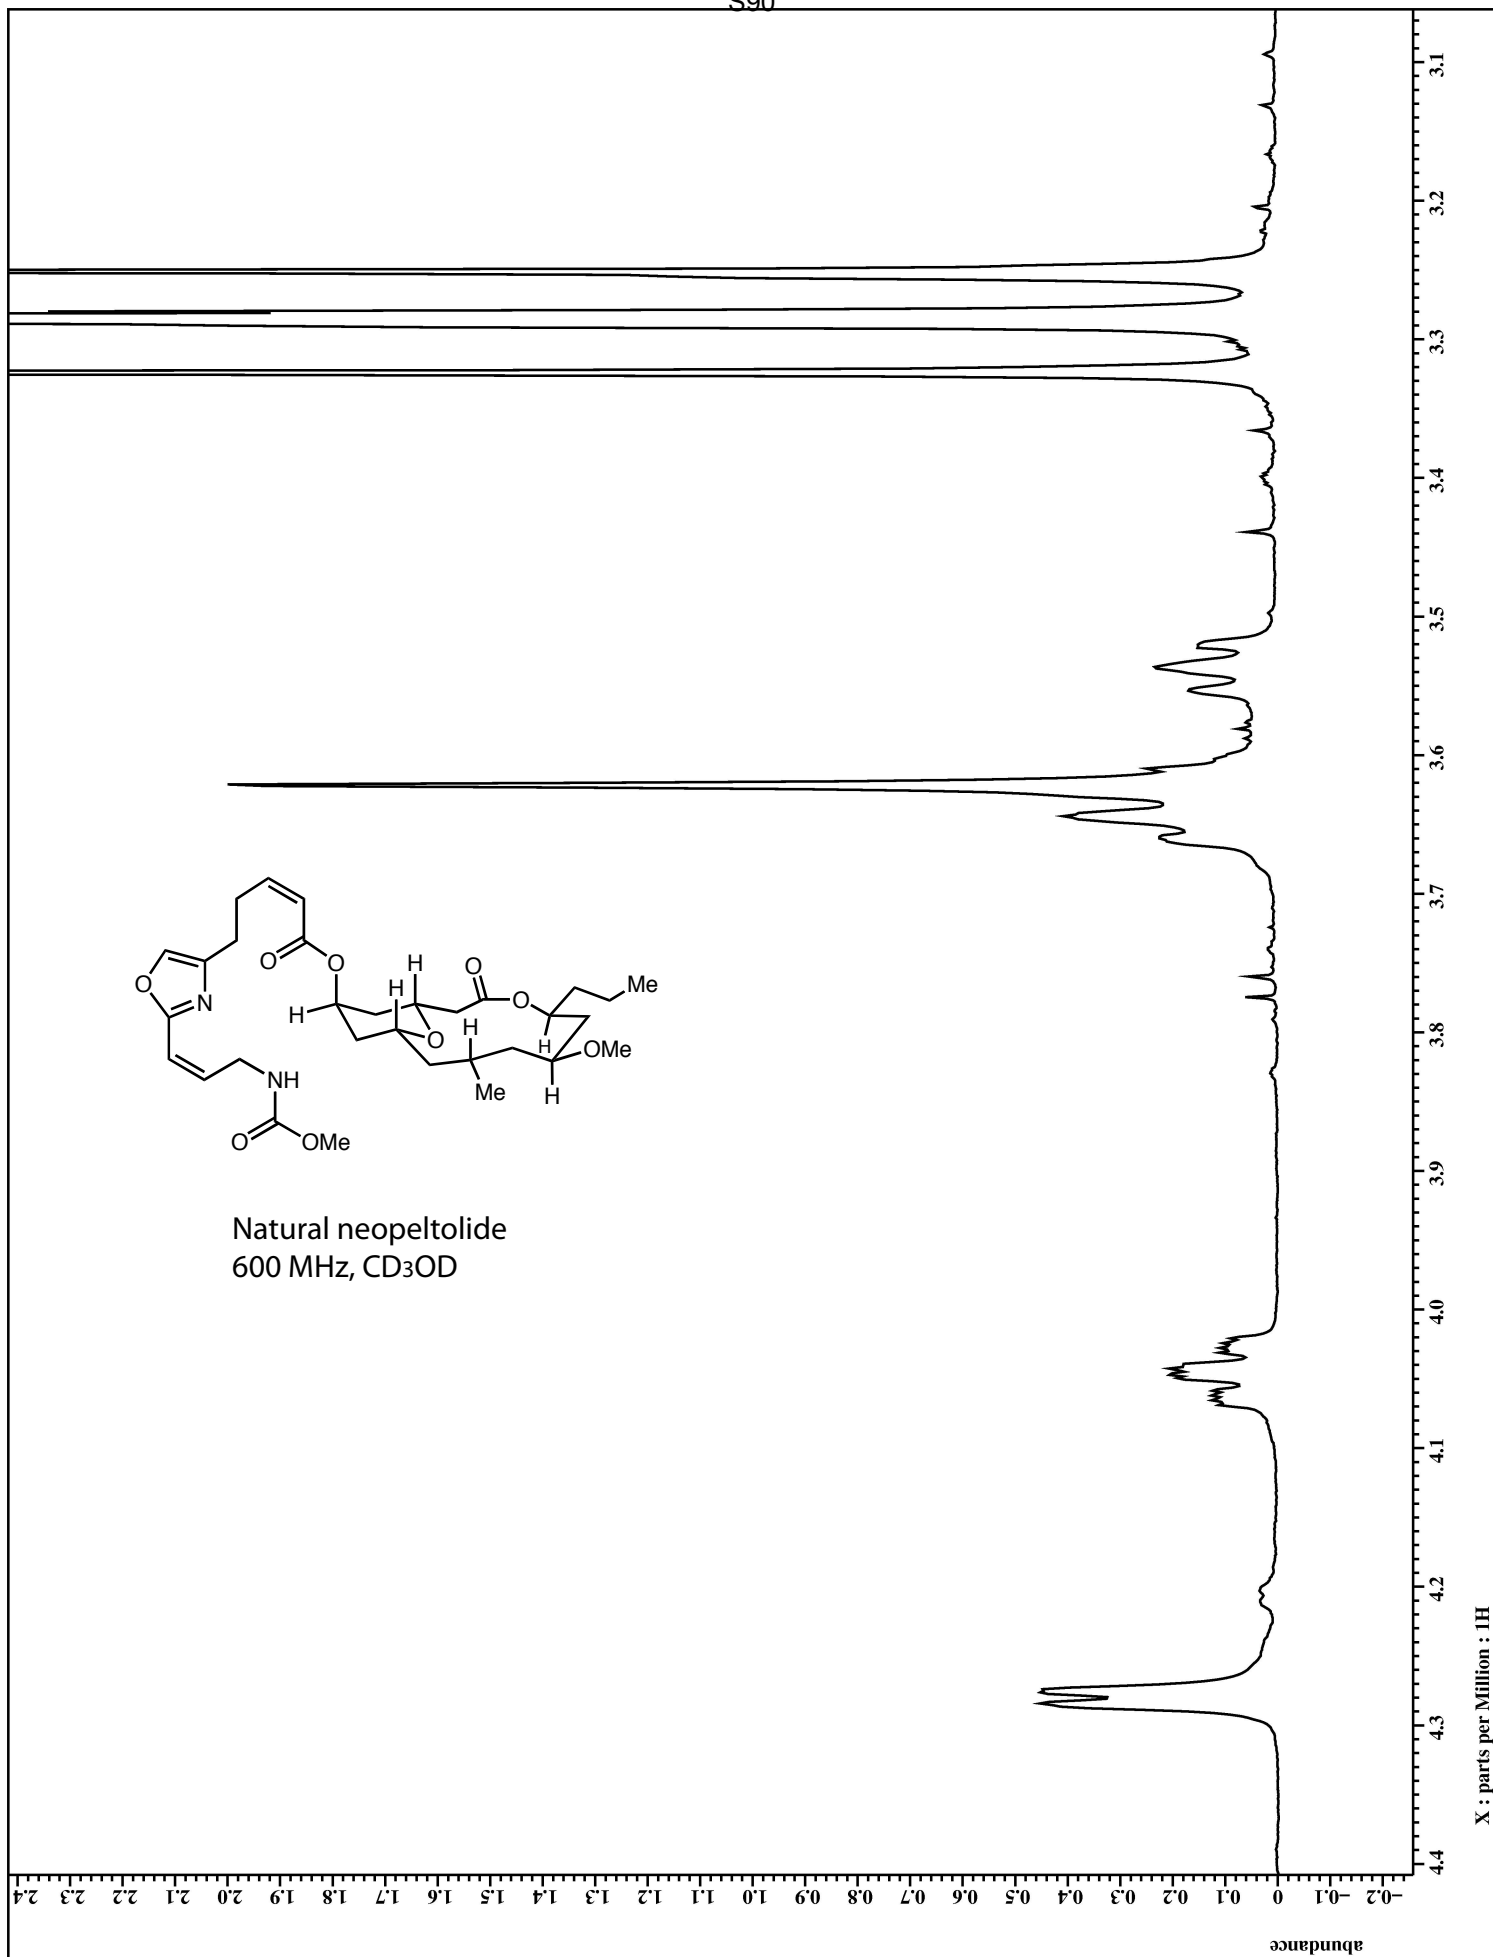

1H LINESHAPE  
1% CHCl3 (89)  
Date: Fri Dec 7 17:50:14 CST 2007  
801venseq08808: s2pu1  
File: dmc5-neopeltolide600  
Spectrometer: Inova500  
Nucleus: H1

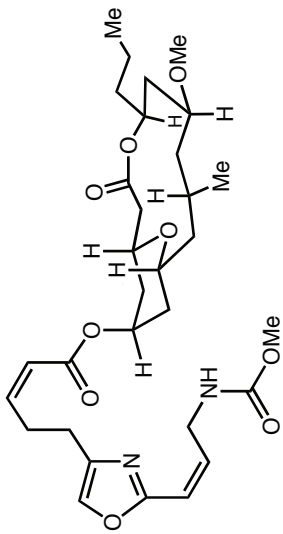

Synthetic neopeltolide (1)  
600 MHz, CD3OD

S91

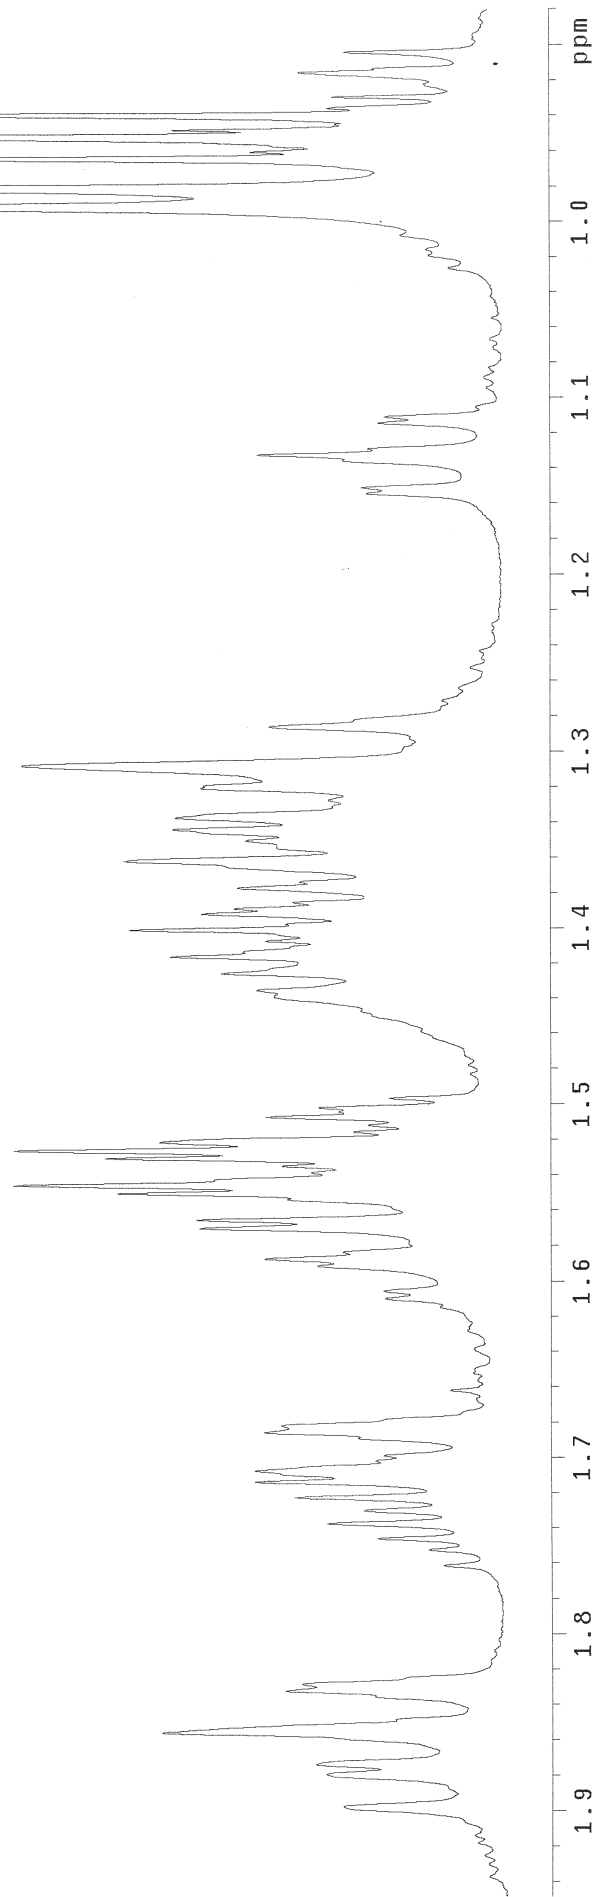

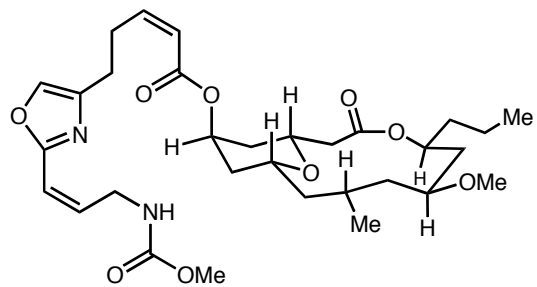

Natural neopeltolide  
600 MHz, CD<sub>3</sub>OD

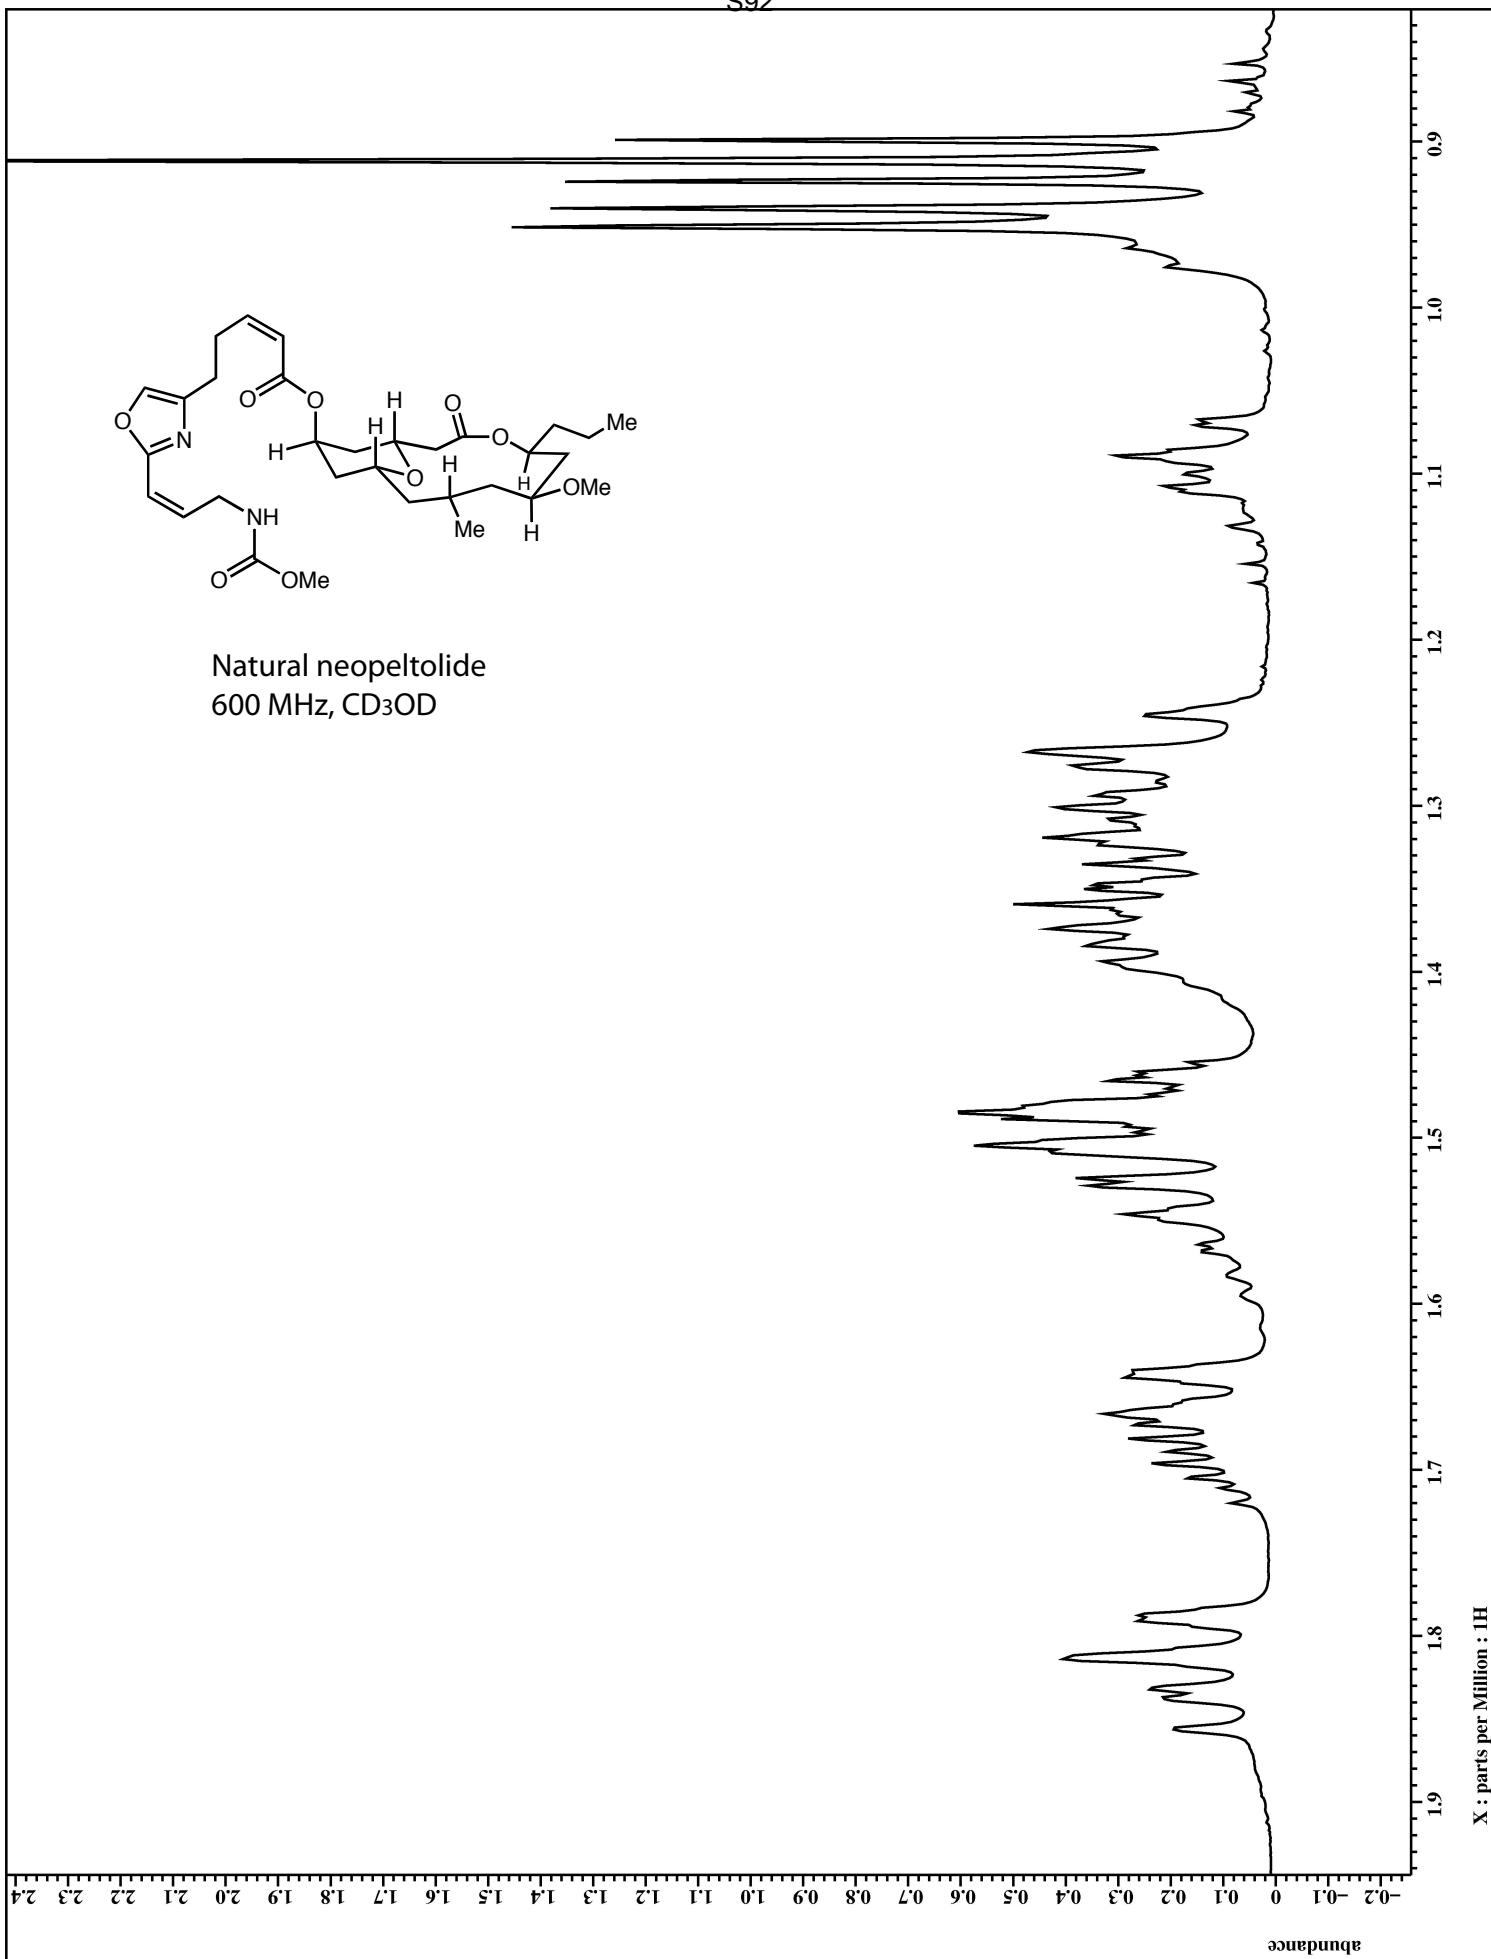

inova400 DB\_5mm RT non-spin  
 C13 std  
 Date: Thu Dec 6 16:45:47 CST 2007  
 Solvent: dms-d6  
 File: dmc5-neoc  
 Spectrometer: Mercury400  
 Nucleus: C13

| INDEX | FREQUENCY | PPM    | HEIGHT |
|-------|-----------|--------|--------|
| 1     | 5015.189  | 49.786 | 223.9  |
| 2     | 4993.826  | 49.574 | 660.2  |
| 3     | 4972.463  | 49.362 | 1295.8 |
| 4     | 4951.100  | 49.150 | 1512.5 |
| 5     | 4929.737  | 48.938 | 1300.9 |
| 6     | 4908.374  | 48.726 | 660.1  |
| 7     | 4887.011  | 48.514 | 218.4  |

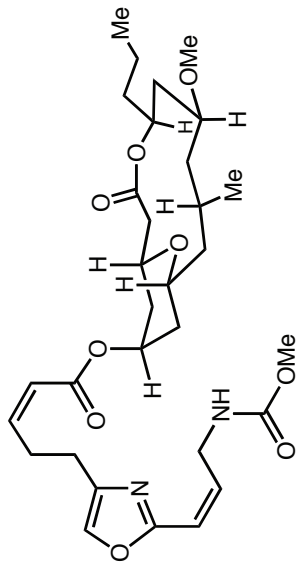

synthetic neopeltolide  
 100 MHz, CD3OD

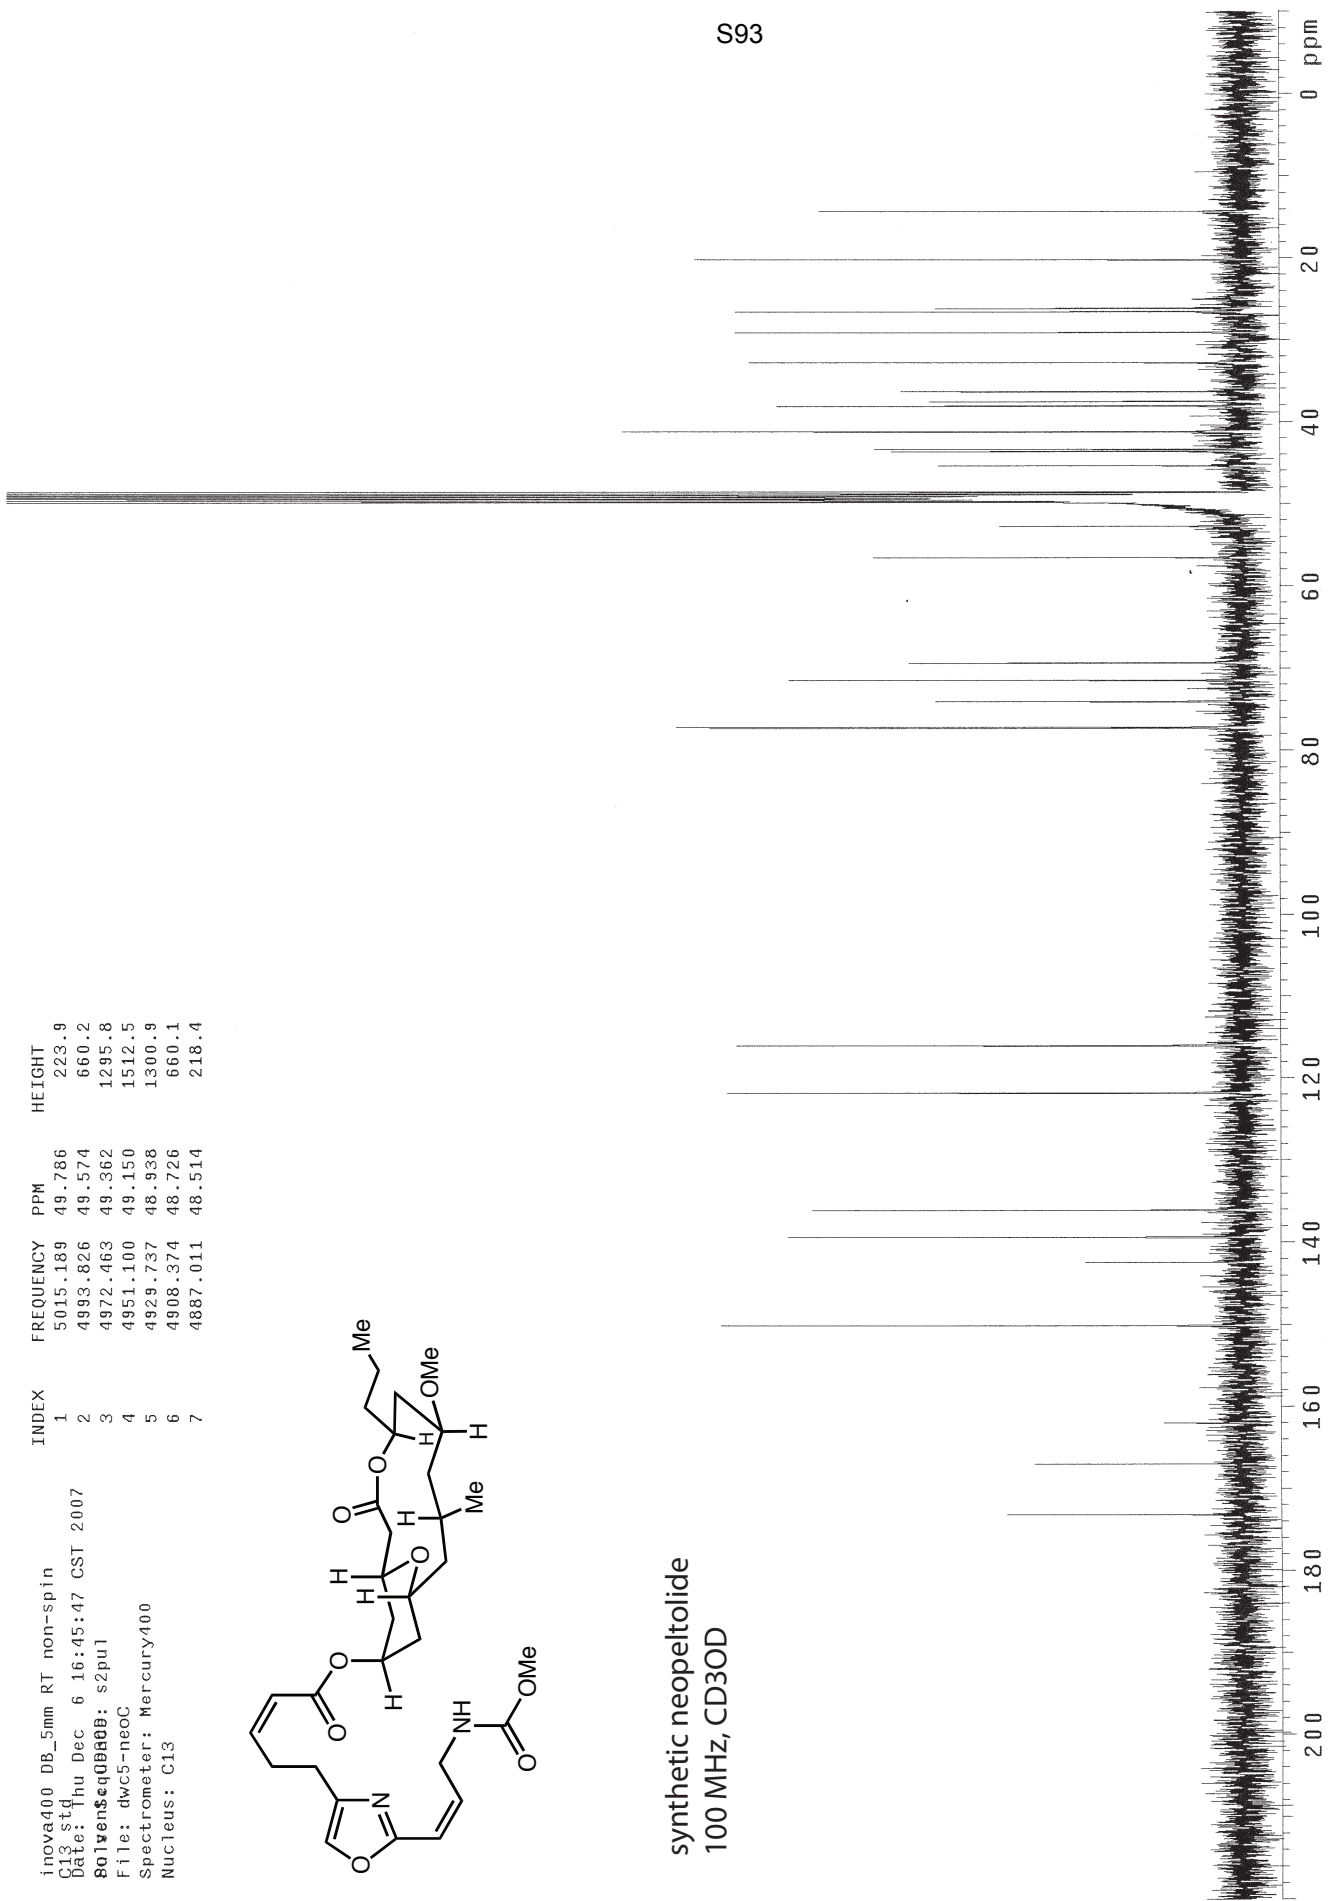

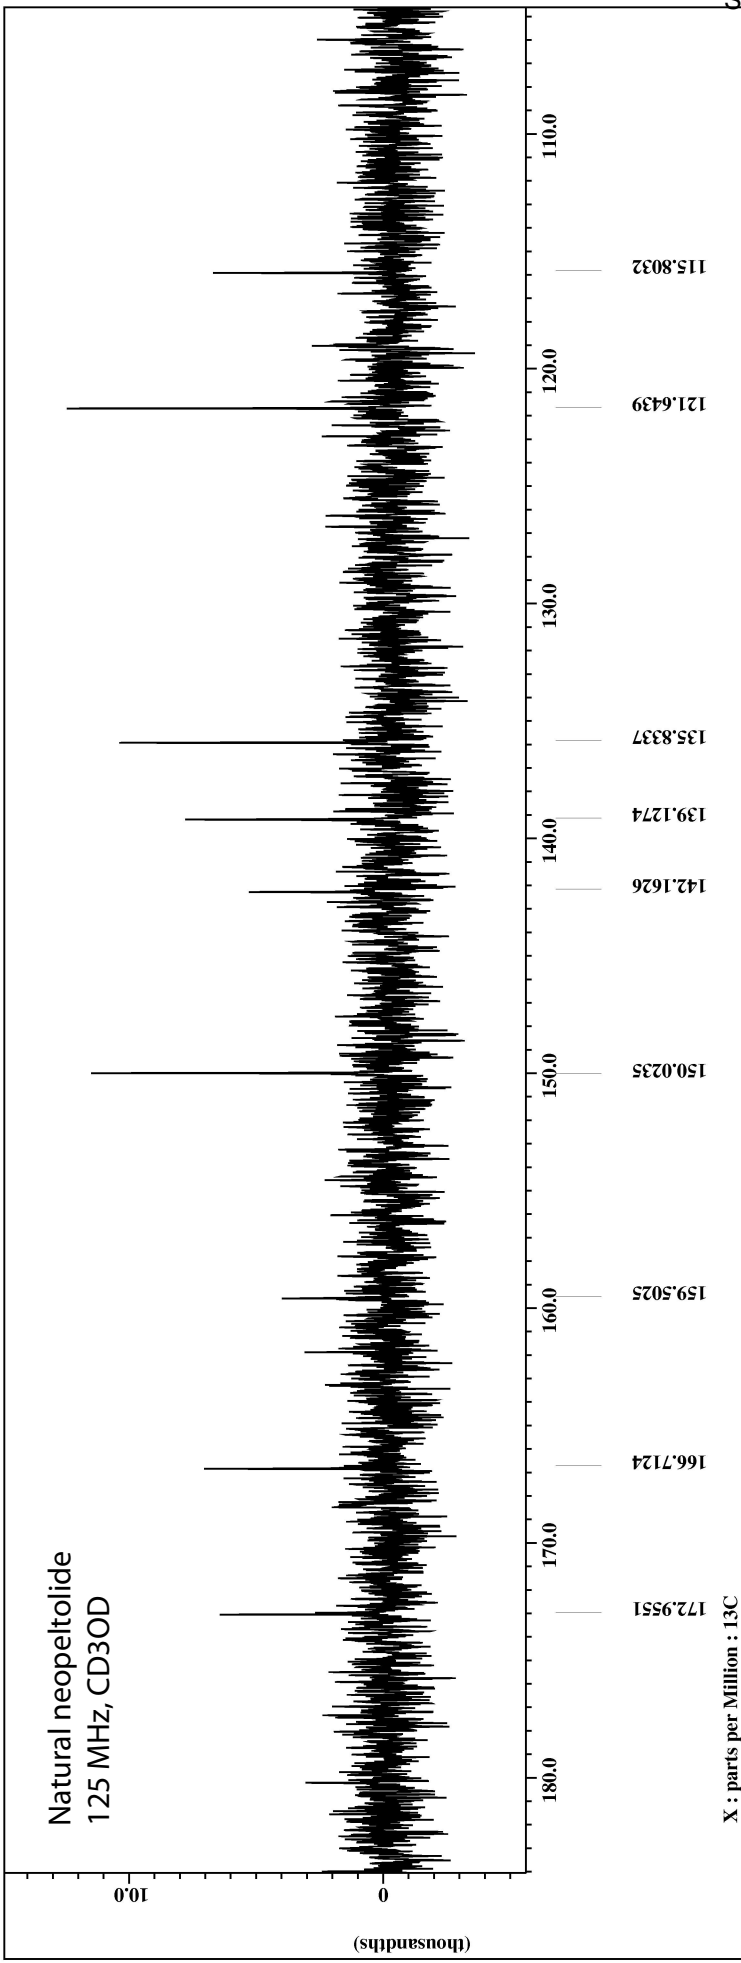

594

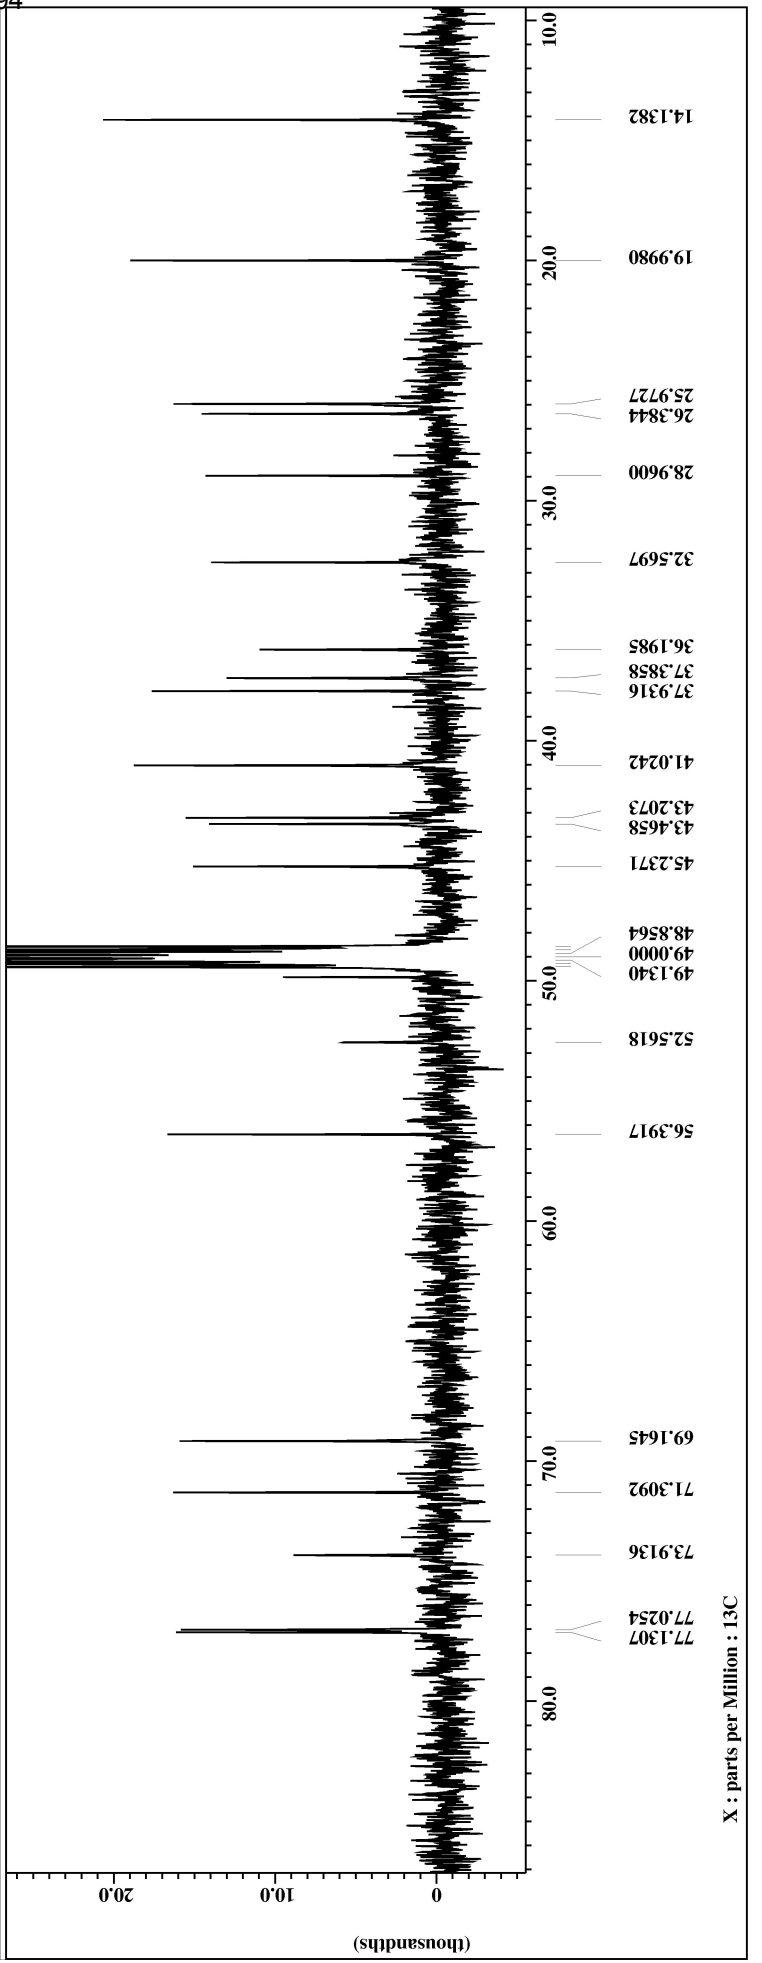

H1 stdpar RT idpfg\_5mm inova500  
Date: 20070803  
Solvent: cd3od

| INDEX | FREQUENCY | PPM   | HEIGHT |
|-------|-----------|-------|--------|
| 1     | 2056.486  | 4.118 | -429.2 |
| 2     | 2046.969  | 4.099 | -844.1 |
| 3     | 2035.988  | 4.077 | -503.3 |
| 4     | 1803.370  | 3.611 | 23.7   |
| 5     | 1793.487  | 3.591 | 37.6   |
| 6     | 1782.689  | 3.570 | 26.9   |
| 7     | 1366.137  | 2.736 | 25.8   |
| 8     | 1351.678  | 2.707 | 29.5   |
| 9     | 1161.338  | 2.325 | 13.2   |
| 10    | 933.295   | 1.869 | 22.1   |
| 11    | 919.386   | 1.841 | 26.5   |

Spectrometer: Inova500  
Nucleus: H1

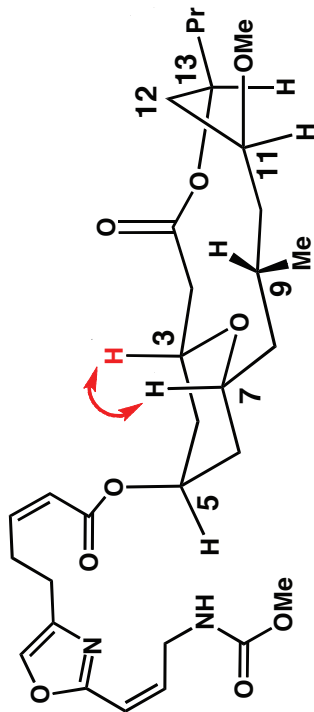

### H3 Irradiation of 1

H7

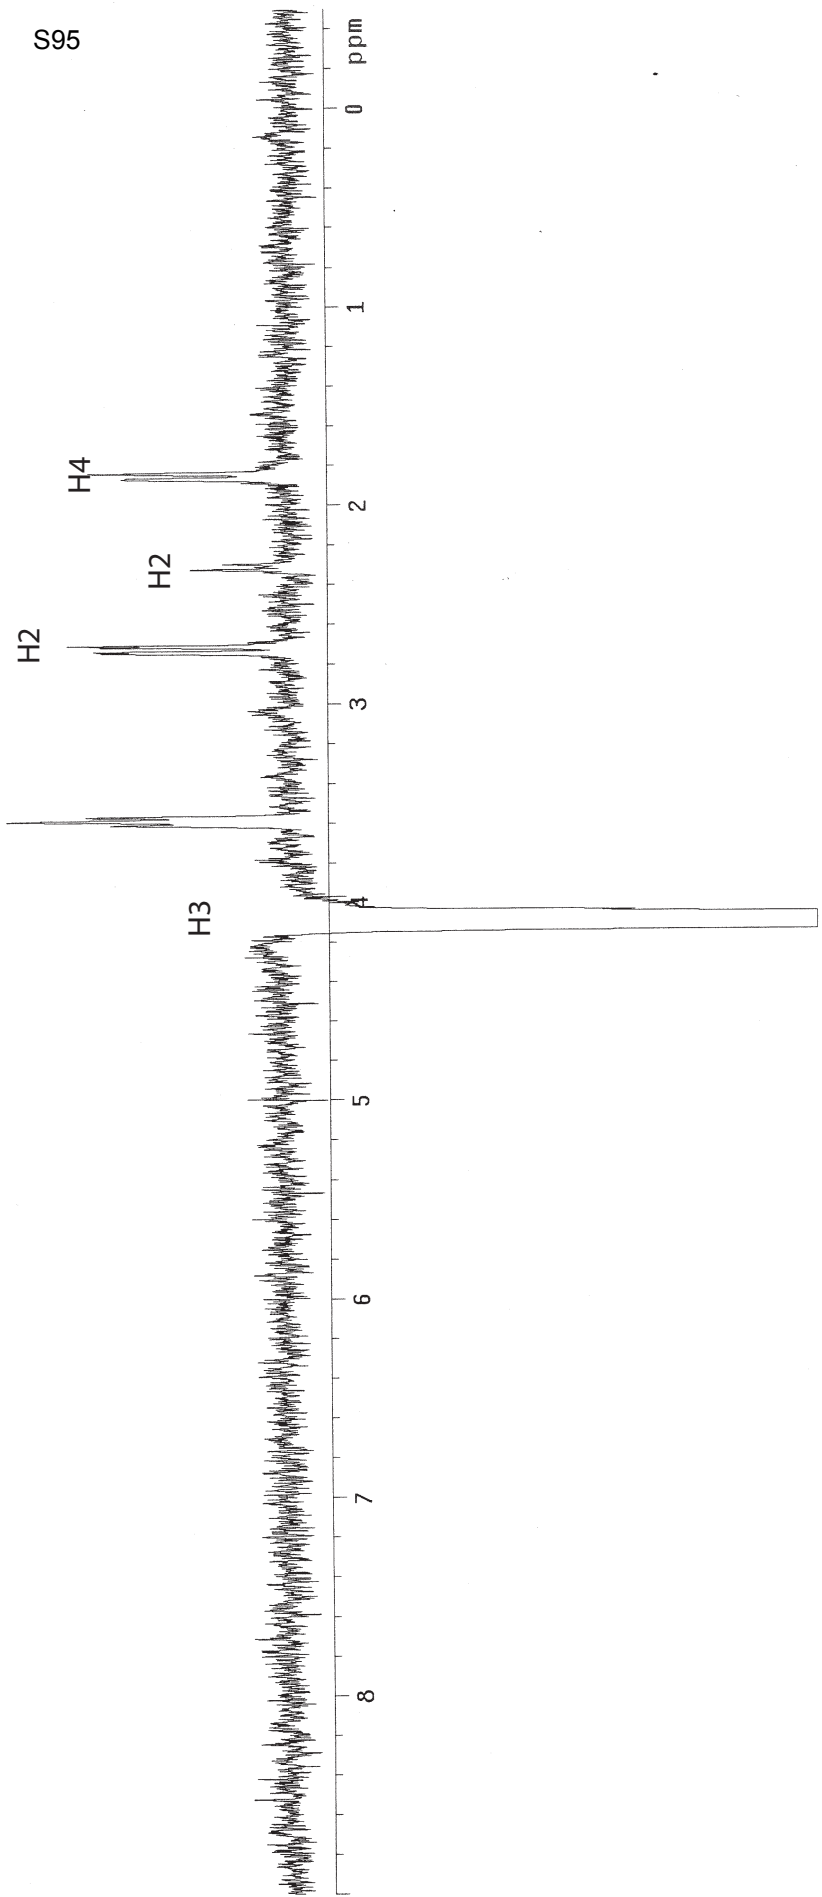

H1 stdpar RT idpfg\_5mm inova500  
 Date Set: 04/11/07  
 Solvent: cd3od

Spectrometer: Inova500  
 Nucleus: H1

| INDEX | FREQUENCY | PPM   | HEIGHT  |
|-------|-----------|-------|---------|
| 1     | 2597.675  | 5.202 | 14.0    |
| 2     | 1856.263  | 3.717 | -548.2  |
| 3     | 1846.563  | 3.698 | -1037.8 |
| 4     | 1837.229  | 3.679 | -597.7  |
| 5     | 1649.817  | 3.304 | 120.7   |
| 6     | 955.258   | 1.913 | 9.5     |
| 7     | 940.250   | 1.883 | 11.6    |
| 8     | 798.410   | 1.599 | 17.4    |
| 9     | 785.965   | 1.574 | 12.6    |
| 10    | 724.104   | 1.450 | 16.9    |
| 11    | 677.617   | 1.357 | 9.0     |
| 12    | 661.694   | 1.325 | 9.4     |

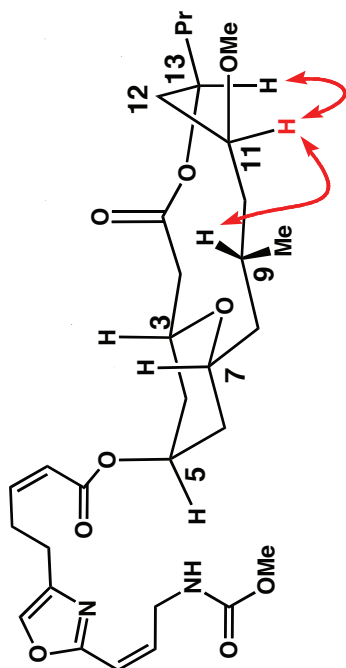

OMe

H9

H12

H11

H13

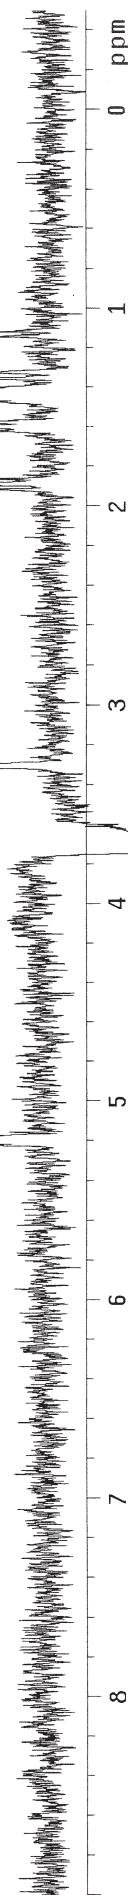



H1 stdpar RT idpfg\_5mm inova500  
 Patte Setuore: 3MDES9634 CST 2007  
 Solvent: cd3od

Spectrometer: Inova500  
 Nucleus: H1

| INDEX | FREQUENCY | PPM   | HEIGHT  |
|-------|-----------|-------|---------|
| 1     | 2607.558  | 5.221 | -732.1  |
| 2     | 2603.349  | 5.213 | -871.9  |
| 3     | 2597.858  | 5.202 | -1202.5 |
| 4     | 2594.198  | 5.195 | -1197.0 |
| 5     | 2588.707  | 5.184 | -815.8  |
| 6     | 2584.498  | 5.175 | -694.5  |
| 7     | 2574.432  | 5.155 | -832.8  |
| 8     | 1846.380  | 3.697 | 20.3    |
| 9     | 1684.042  | 3.372 | 15.2    |
| 10    | 1649.634  | 3.303 | 22.9    |
| 11    | 865.578   | 1.733 | 11.2    |
| 12    | 773.336   | 1.549 | 19.5    |
| 13    | 686.036   | 1.374 | 24.1    |
| 14    | 480.871   | 0.963 | 13.1    |

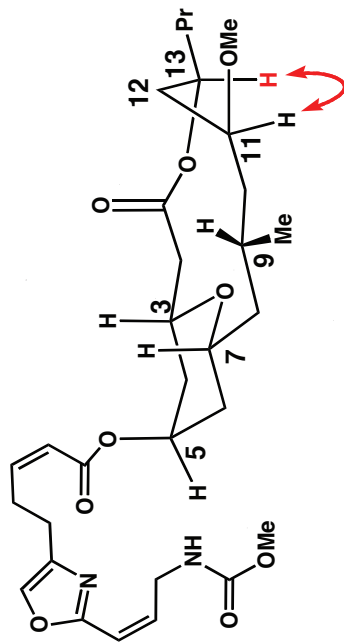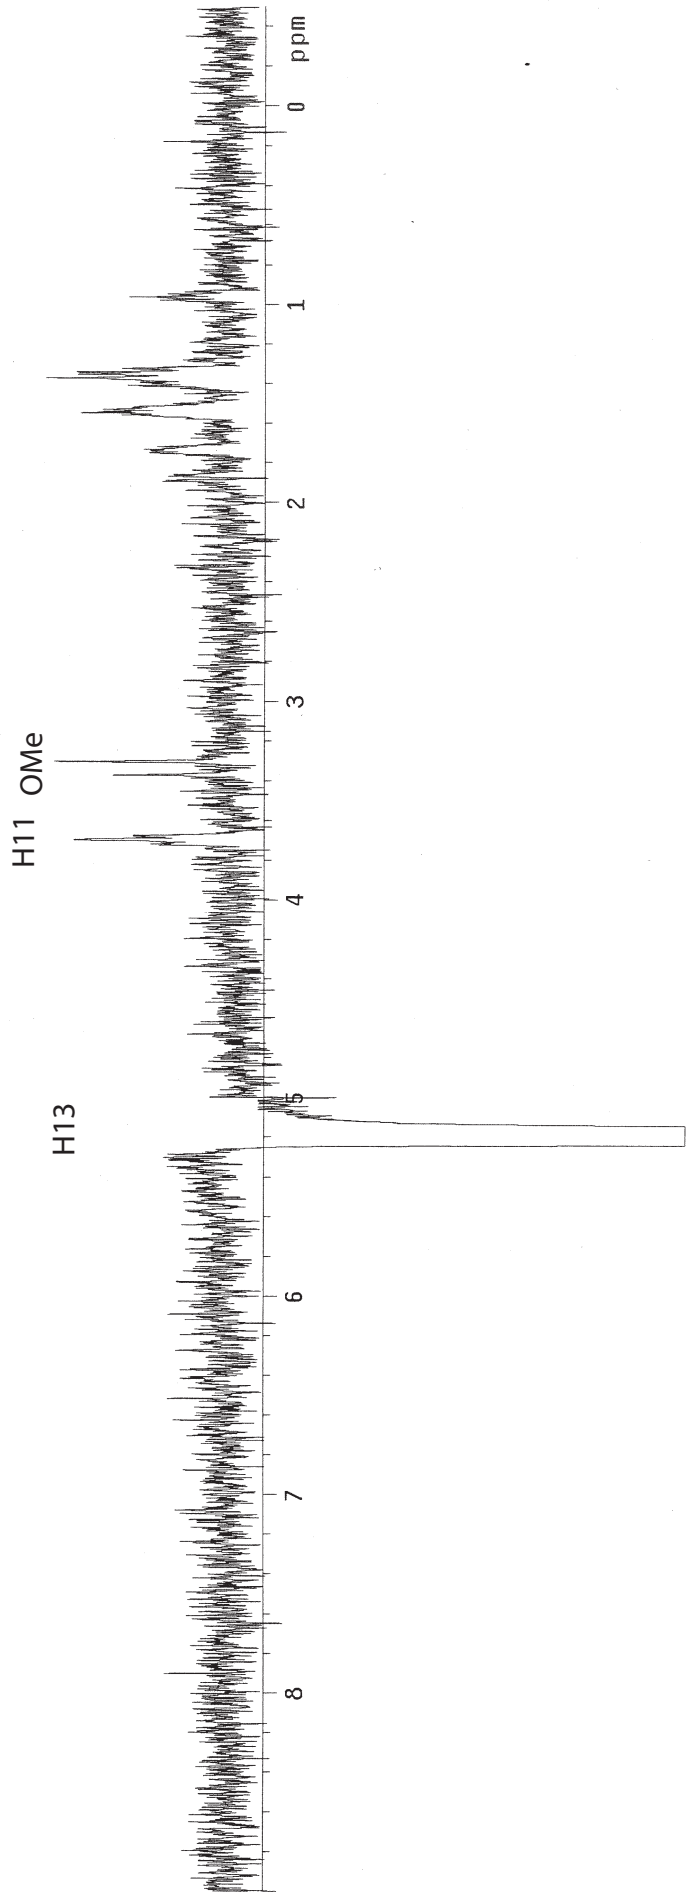

H1 stdpar RT idpfg\_5mm inova500  
 File Sequence: N05EY1634 CST 2007  
 Solvent: cd3od

| INDEX | FREQUENCY | PPM   | HEIGHT |
|-------|-----------|-------|--------|
| 1     | 2048.251  | 4.101 | 27.8   |
| 2     | 1802.821  | 3.610 | -362.6 |
| 3     | 1792.938  | 3.590 | -604.4 |
| 4     | 1783.055  | 3.570 | -399.8 |
| 5     | 845.995   | 1.694 | 19.4   |
| 6     | 716.966   | 1.436 | 18.8   |

Spectrometer: Inova500  
 Nucleus: H1

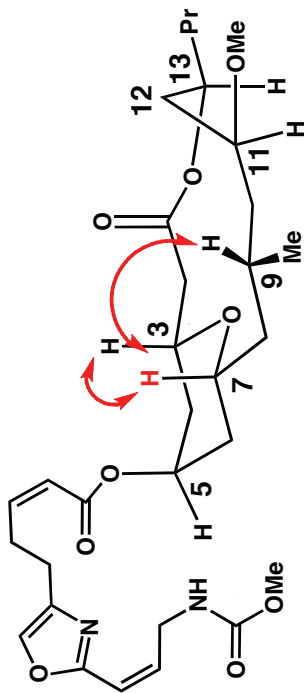

H7 Irradiation of 1

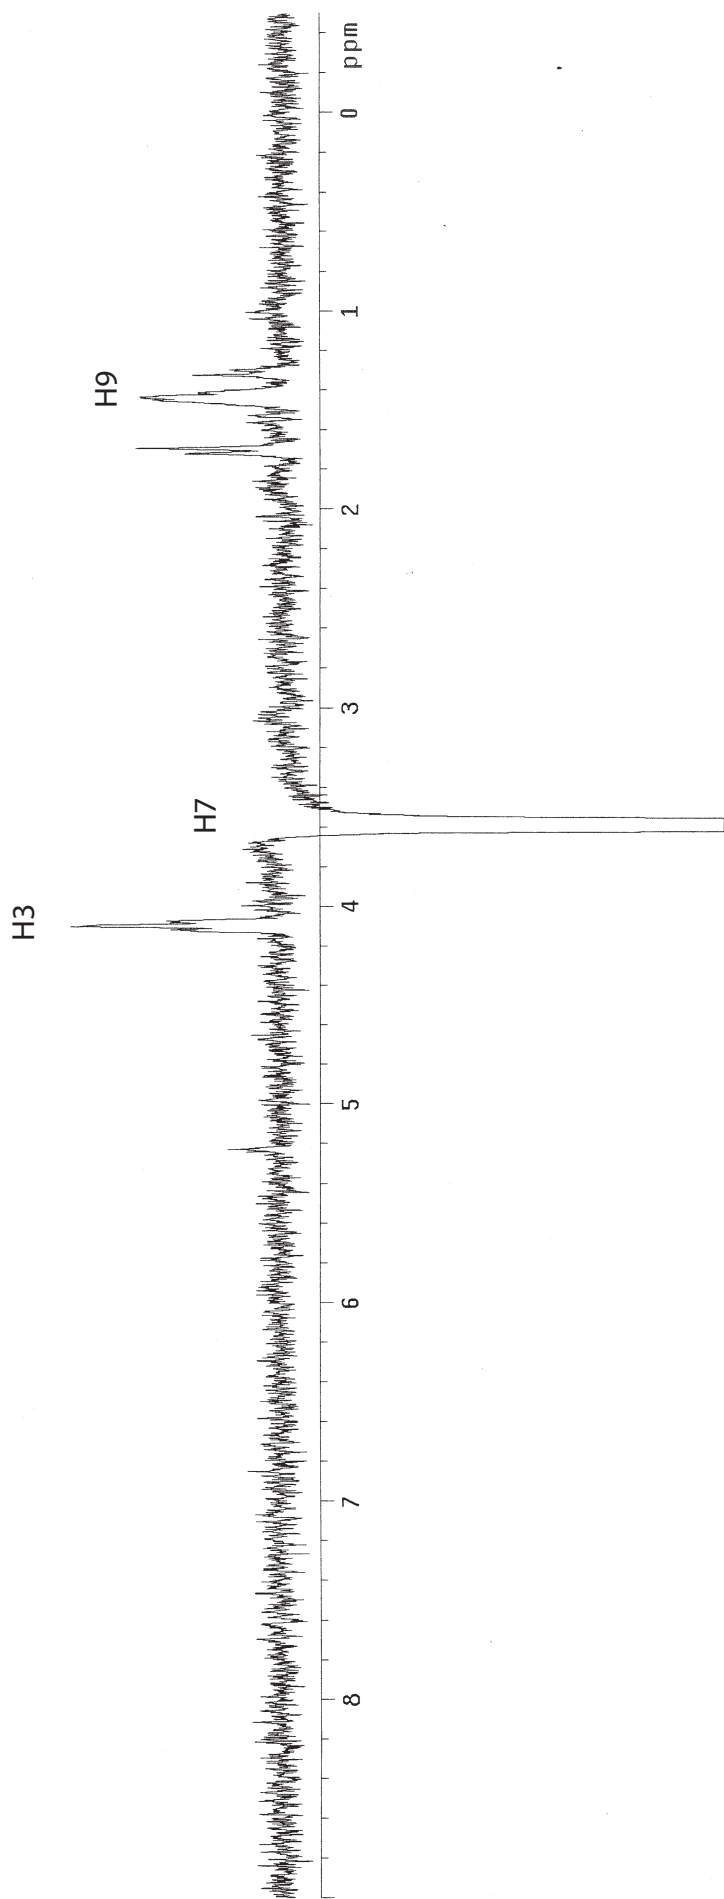

NOESY for synthetic neopeltolide (1) Next eight pages

```

H1 stdpar RT idpfg_5mm inova500
exp8 NOESY
SAMPLE          FLAGS
date            Nov 2 2007      hs
solvent         CD3OD          sspul
sample          undefined      pfgflg
ACQUISITION    hsglvi        2000
sw             6000.6         SPECIAL
at            0.171          temp not used
np            2048           gain
fb            not used       spin 0
ss            1.000          f2 PROCESSING
nt            16             gf 0.079
2D ACQUISITION 16           gfs not used
sw1           6000.6         fn 2048
ni            192           gf1 0.031
TRANSMITTER    H1           not used
tn            499.410       fn1 2048
sfrq          52            sp 306.3
tof           10.800       wp 3026.7
tpwr          0.400       sp1 313.9
pw            mmmn        wp1 3102.9
MIX            0.400       rf1 503.2
PRESATURATION mmmn        rfp 0
satmode       0           rfp1 501.4
satpwr        0           rfp1 0
satdly        0           PLOT
satfrq        0           WC 155.0
DECOUPLER     C13         SC 10.0
dh            mnn        WC2 155.0
dm            mnn        SC2 0
                    VS 567
                    th 1
                    at ph
    
```

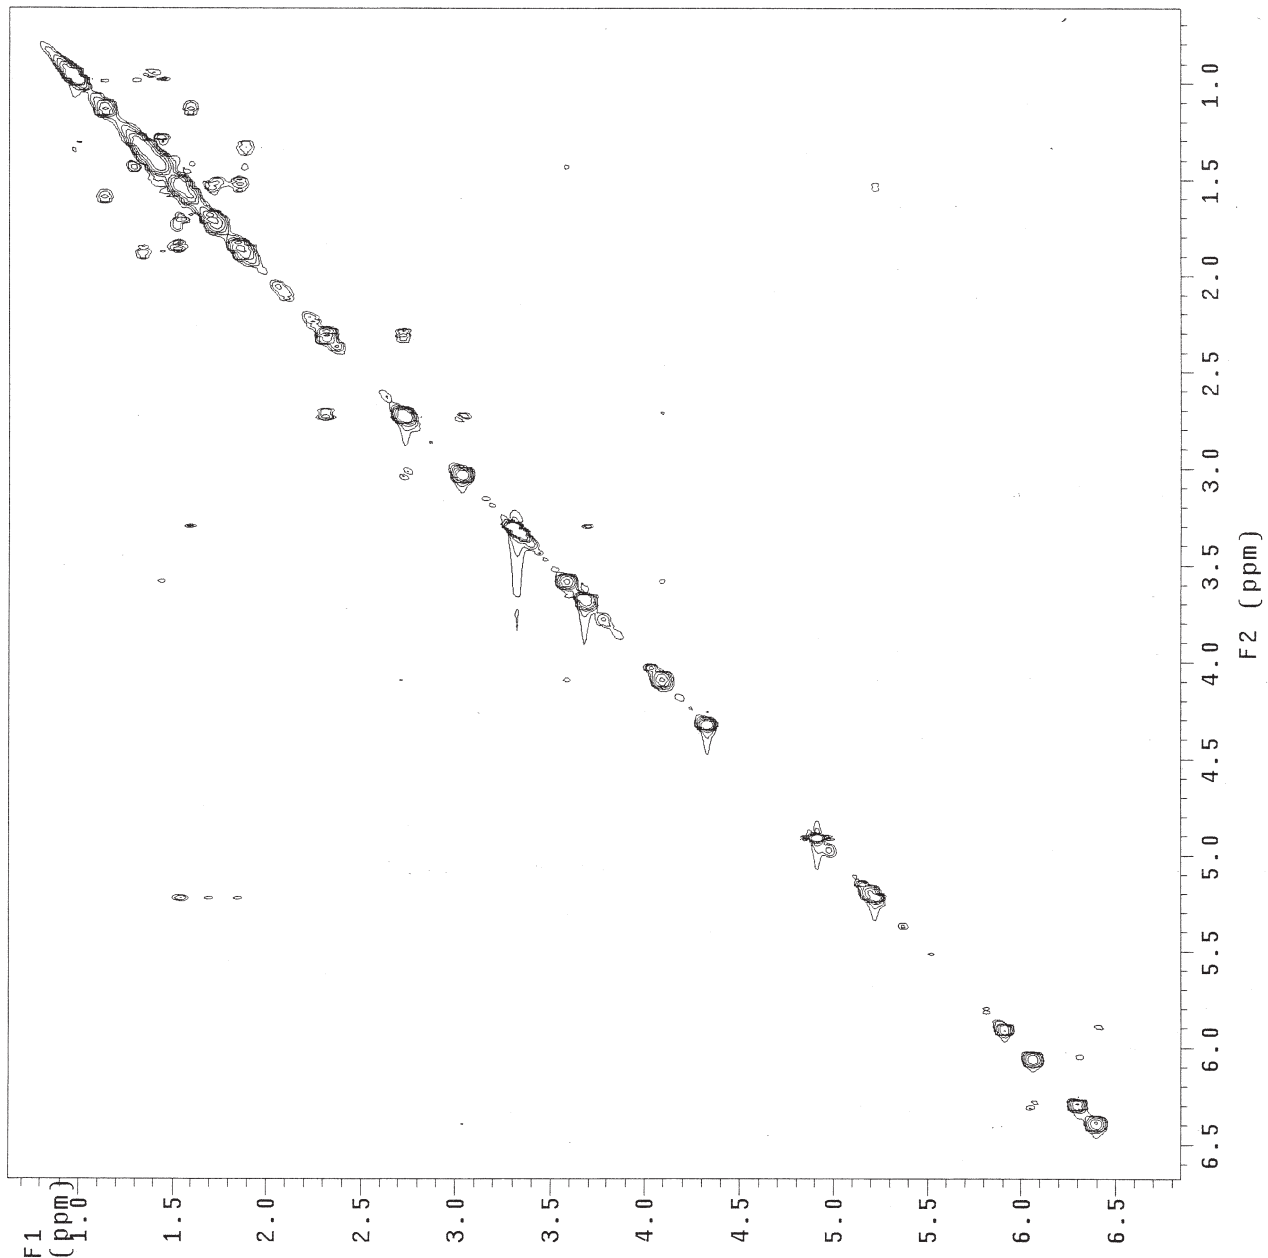

H1 stdpar RT idpfg\_5mm inova500

exp8 NOESY

|                |            |       |            |      |
|----------------|------------|-------|------------|------|
| date           | Nov 2 2007 | hs    | flags      | n    |
| solvent        | CD3OD      | sspul |            | y    |
| sample         | undefined  | pfclg |            |      |
| ACQUISITION    | 6000.6     | hsglv | SPECIAL    | 2000 |
| sw             | 0.171      | temp  | not used   |      |
| at             | 2048       | gain  | 32         |      |
| np             | not used   | spin  | 0          |      |
| fb             | 1.000      | gf    | 0.079      |      |
| ss             | 32         | F2    | PROCESSING |      |
| d1             | 16         | fn    | not used   |      |
| nt             | 2048       | ni    | PROCESSING |      |
| 2D ACQUISITION | 6000.6     | F1    | 0.031      |      |
| sw1            | 192        | gfs1  | not used   |      |
| ni             | 499.410    | fn1   | 2048       |      |
| tn             | H1         | proc1 | ip         |      |
| sfrq           | 499.410    | fn1   | DISPLAY    |      |
| tof            | 0          | sp    | 1954.5     |      |
| tpwr           | 10.800     | wp    | 187.7      |      |
| pw             | NOESY      | sp1   | 753.9      |      |
| mix            | 0.400      | wp1   | 1484.0     |      |
| PRESATURATION  | nnnn       | rfl   | 503.2      |      |
| satmode        | 0          | rfl1  | 501.4      |      |
| satpwr         | 0          | rfl1  | 0          |      |
| satdly         | 0          | rfl1  | 0          |      |
| satfrq         | 0          | rfl1  | 0          |      |
| DECOUPLER      | C13        | wc    | 155.0      |      |
| dn             | nnn        | sc    | 10.0       |      |
| dm             |            | wc2   | 155.0      |      |
|                |            | sc2   | 567        |      |
|                |            | vs    | th         | ph   |
|                |            | th    | ai         |      |
|                |            | ai    |            |      |

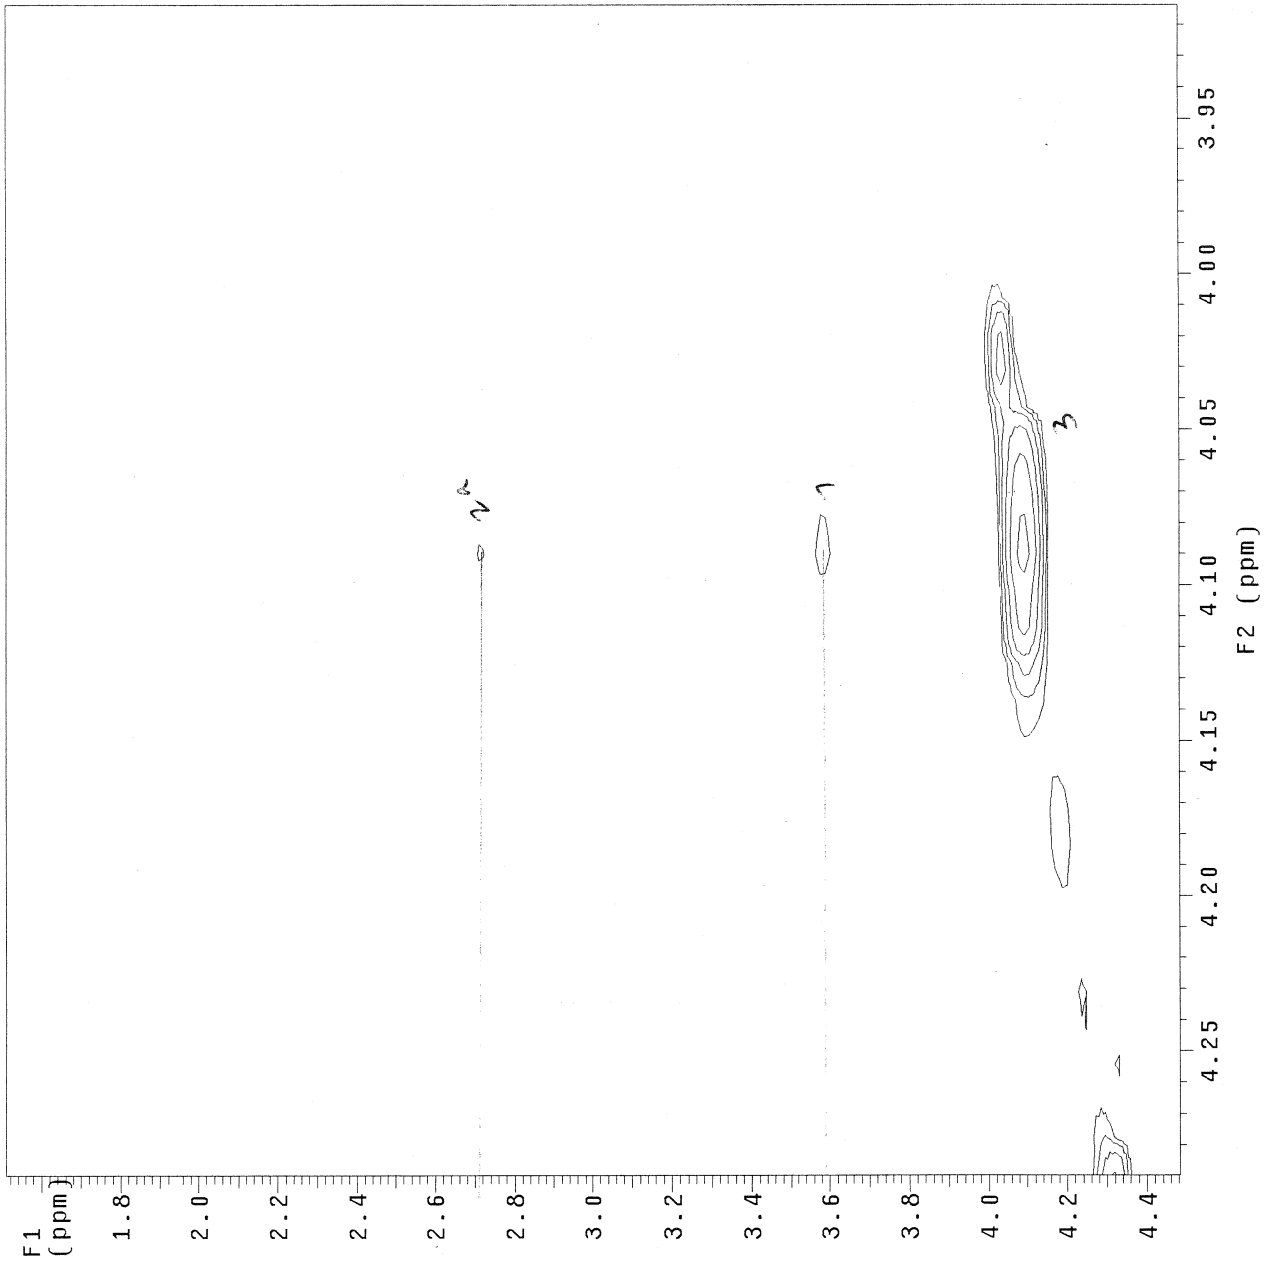

H1 stdpar RT idpfg\_5mm inova500

exp8 NOESY

```

SAMPLE          FLAGS
date Nov 2 2007 n
solvent CD300  sspul
sample undefined PFGflg
ACQUISITION 2000
sw 6000.6 SPECIAL
at 0.171 temp not used
np 2048 gain 32
fb not used spin 0
ss 32 F2 PROCESSING
d1 1.000 gf 0.079
nt 16 fn not used
2D ACQUISITION 16 F1 PROCESSING
sw1 6000.6 fn 2048
n1 192 gf1 0.031
tn TRANSMITTER H1 proci
sfrq 499.410 fn1 2048
tof 0 DISPLAY
tpwr 52 sp 1725.8
pw 10.800 wp 146.6
NOESY SP1 501.6
mix PRESATURATION rfl 1759.7
satmode nnnn rfp 503.2
satpwr 0 rfl1 501.4
satdly 0 rfp1 0
satfrq 0 PLOT
DECOUPLER WC 155.0
dn C13 SC 10.0
dm nnn WC2 155.0
VS SC2 567
th ai ph
  
```

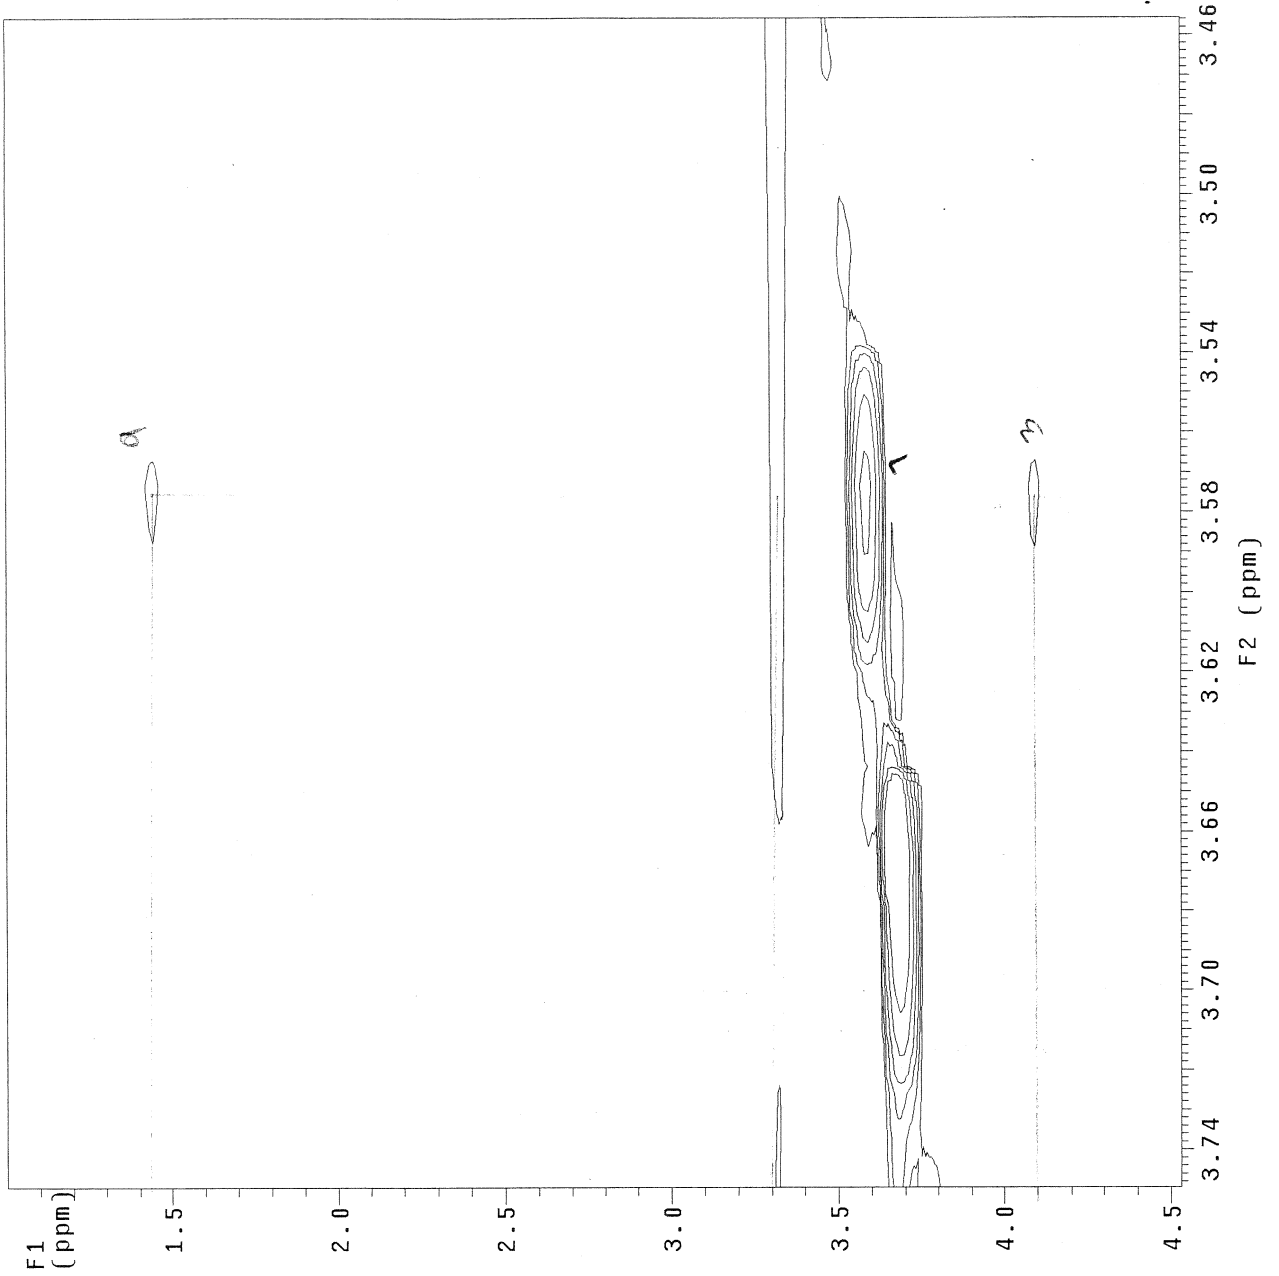

H1 stdpar RT idpfg\_5mm inova500

```

exp8 NOESY
SAMPLE
date Nov 2 2007
solvent CD3OD
sample undefined
ACQUISITION
sw 6000.6
at 0.171
np 2048
fb not used
ss 32
d1 1.000
nt 16
2D ACQUISITION
sw1 6000.6
ni 192
tn TRANSMITTER H1
tof 499.410
tpwr 52
pw NOESY 10.800
mix NOESY 0.400
PRESATURATION nnnn
satmode 0
satpwr 0
satdly 0
satfrq 0
DECOUPLER C13
dn nnn
dm
n y 2000
hs sspul
pfgflg
hsgtvl SPECIAL
temp not used
gain 32
spin 0
F2 PROCESSING
gf 0.079
fn not used
F1 PROCESSING
gf1 0.031
gfs1 not used
procl lp
fni 2048
DISPLAY
sp 1602.6
wp 111.4
sp1 542.7
wp1 1507.5
f1f1 503.2
rfp 501.4
rf11 0
rfp1 0
PLOT
wc 155.0
sc 10.0
wc2 155.0
sc2 0
vs 567
th a1
ph 1
    
```

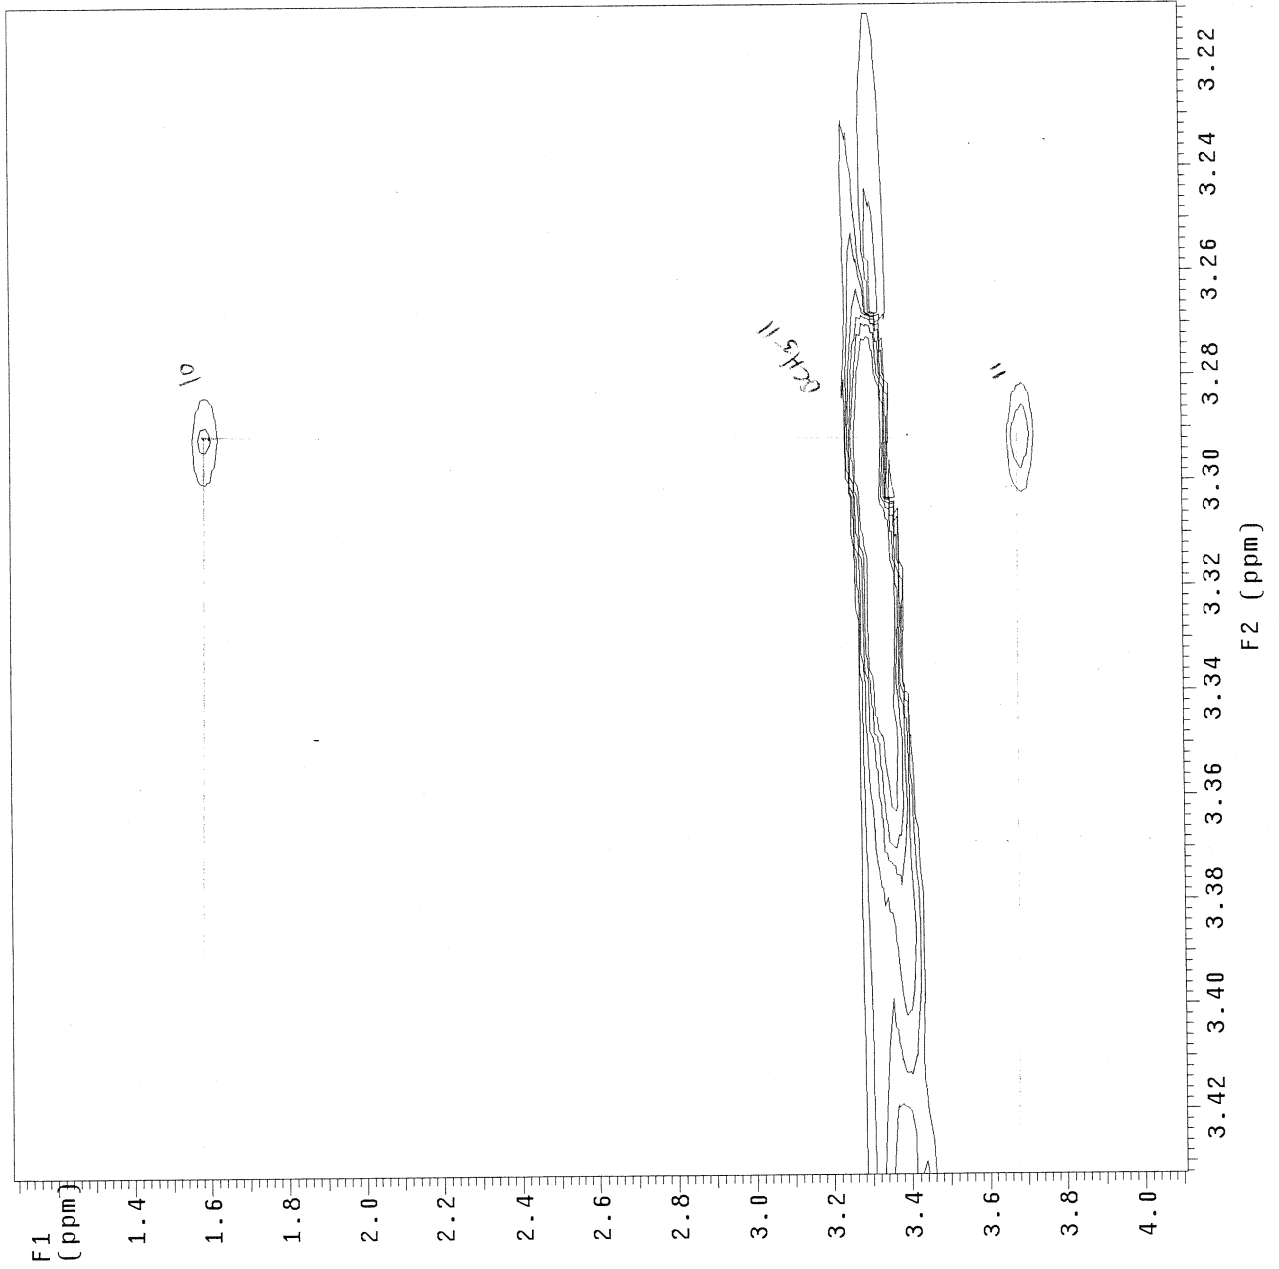

H1 stdpar RT idpfg\_5mm inova500

exp8 NOESY

```

SAMPLE          FLAGS
date Nov 2 2007 hs n
solvent CD3OD  spul y
sample undefined p6f1g y
ACQUISITION    hsglvi 2000
sw 6000.6      SPECIAL
at 0.171      temp not used
np 2048      gain 32
fb not used  spin 0
ss 32      F2 PROCESSING
d1 1.000     gf 0.079
nl 2D ACQUISITION 16  fn not used
sw1 6000.6   F1 PROCESSING
n1 192      gf1 0.031
tn TRANSMITTER H1  procl lp
sfrq 499.410 fn1 DISPLAY 2048
tof 52      sp 1813.8
tpwr 10.800 wp 176.0
pw NOESY 0.400 wp1 525.1
mix PRESATURATION nnnn rfp 503.2
satmode 0 rfl 501.4
satpwr 0 rfp1 0
satdly 0
satfrq 0 PLOT
dn DECOUPLER C13 wc 155.0
dm nnn sc 10.0
sc2 155.0
vs 567
th at ph 1
    
```

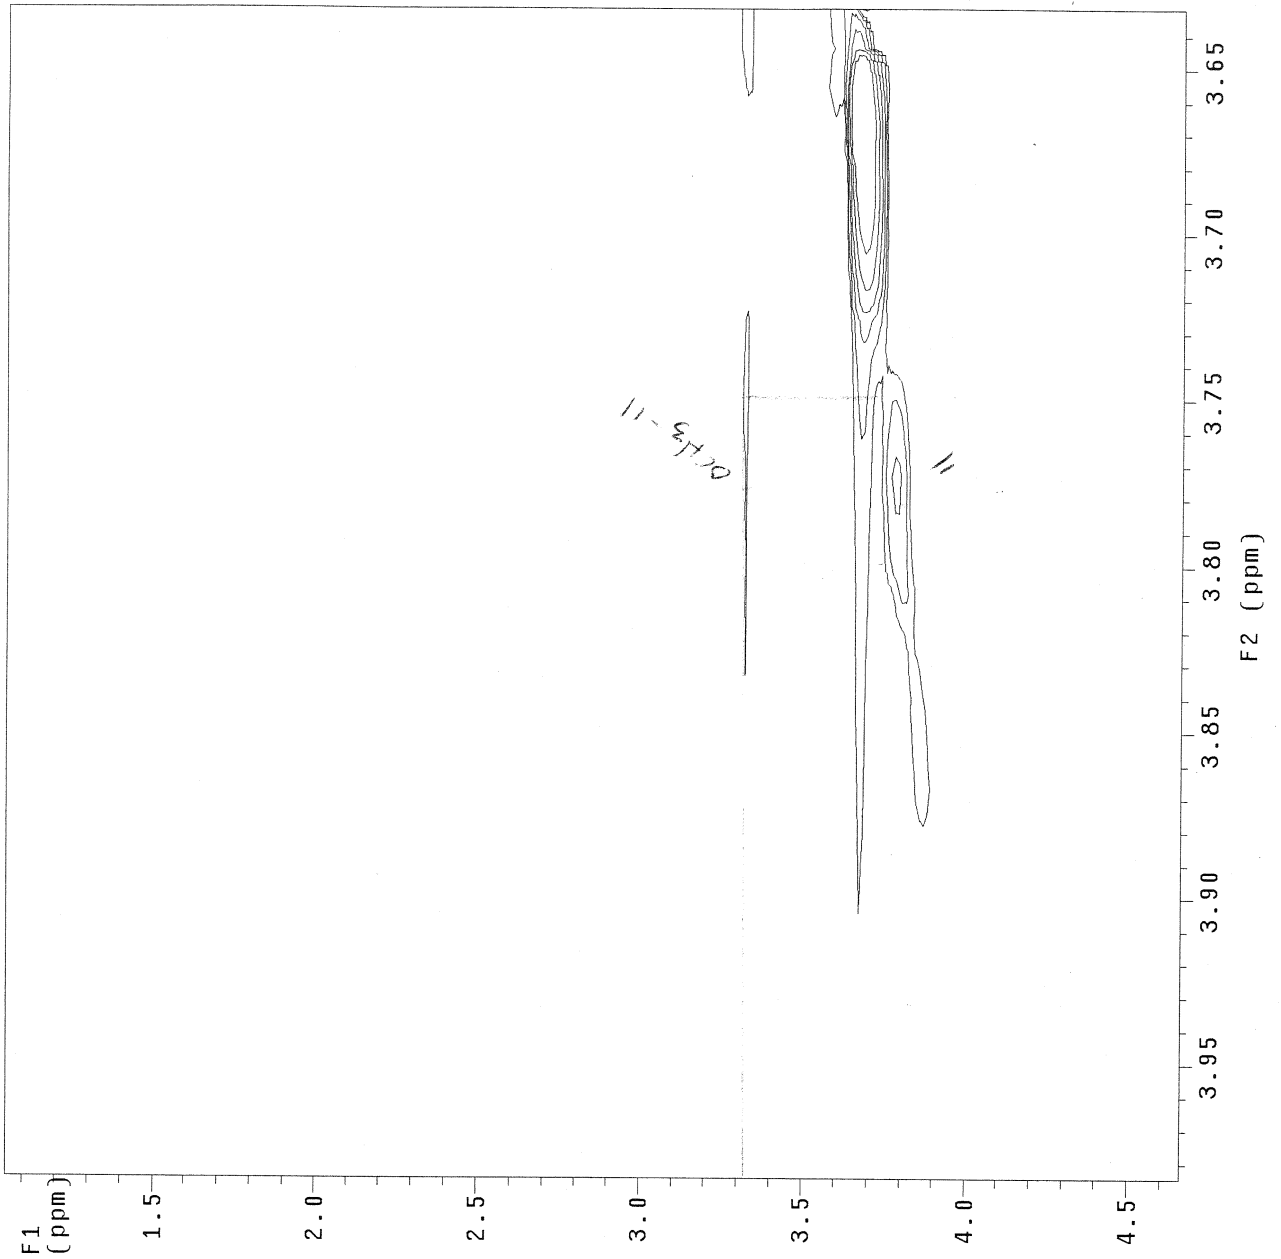

H1 stdpar RT idpfg\_5mm inova500

exp8 NOESY

|                |                |               |          |
|----------------|----------------|---------------|----------|
| date           | Nov 2 2007     | hs            | n        |
| solvent        | CD300          | sspul         | y        |
| sample         | undefined      | hsgflg        | 2000     |
| ACQUISITION    |                | SPECIAL       |          |
| sw             | 6000.6         | temp          | not used |
| at             | 0.171          | gain          | 32       |
| np             | 2048           | spn           | 0        |
| fb             | not used       | f2 PROCESSING |          |
| ss             | 32             | fn            | 0.079    |
| d1             | 1.000          | fp            | not used |
| nt             | 16             | fn            | 2048     |
| 2D ACQUISITION |                | F1 PROCESSING |          |
| sw1            | 6000.6         | gf1           | 0.031    |
| ni             | 192            | gfs1          | not used |
| tn             | TRANSMITTER H1 | lp            | lp       |
| sfrq           | 499.410        | proc1         | 2048     |
| tof            | 0              | fn1           | DISPLAY  |
| tpwr           | 52             | sp            | 1432.5   |
| pw             | 10.800         | wp            | 176.0    |
|                | NOESY          | sp1           | 525.1    |
| mix            | 0.400          | wp1           | 1800.8   |
| PRESATURATION  |                | rfl           | 503.2    |
| satmode        | nnnn           | rfp           | 0        |
| satpwr         | 0              | rfi1          | 501.4    |
| satdly         | 0              | rfp1          | 0        |
| satfrq         | 0              | PLOT          |          |
| DECOUPLER      |                | wc            | 155.0    |
| dh             | C13            | sc            | 10.0     |
| dm             | nnn            | wc2           | 155.0    |
|                |                | sc2           | 0        |
|                |                | vs            | 567      |
|                |                | th            | 1        |
|                |                | at            | ph       |

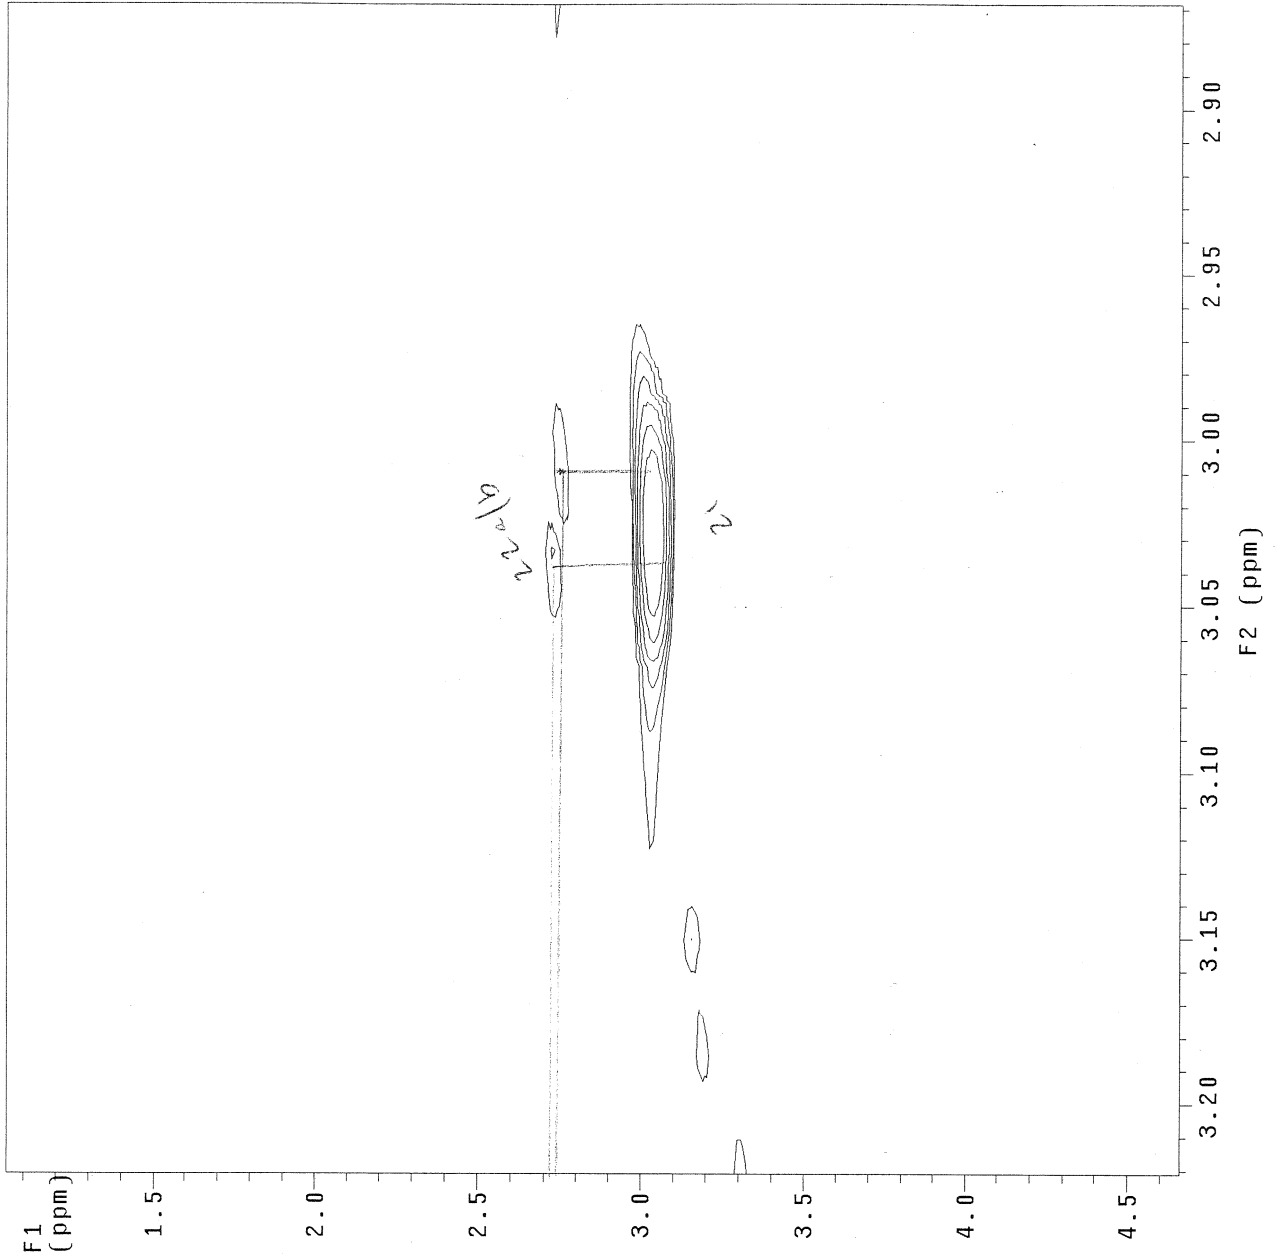



H1 stdpar RT idpfg\_5mm inova500

exp8 NOESY

|               |             |         |            |      |
|---------------|-------------|---------|------------|------|
| date          | Nov 2 2007  | hs      | flags      | n    |
| solvent       | CD3OD       | sspul   |            | y    |
| sample        | undefined   | pfGfIg  |            | y    |
| ACQUISITION   |             | hsglv1  | SPECIAL    | 2000 |
| sw            | 6000.6      | temp    | not used   |      |
| at            | 0.171       | gain    | 32         |      |
| np            | 2048        | spIn    | 0          |      |
| fb            | not used    | F2      | PROCESSING |      |
| ss            | 32          | gf      | 0.079      |      |
| d1            | 1.000       | gfs     | not used   |      |
| nt            | ACQUISITION | fn      | 2048       |      |
| 2D            | 16          | F1      | PROCESSING |      |
| sw1           | 6000.6      | gf1     | 0.031      |      |
| ni            | 192         | gfs1    | not used   |      |
| TRANSMITTER   | H1          | proc1   | lp         |      |
| tn            | 499.410     | fn1     | 2048       |      |
| sfrq          | 0           | DISPLAY |            |      |
| tof           | 52          | sp      | 1068.8     |      |
| tpwr          | 10.800      | wp      | 176.0      |      |
| pw            | NOESY       | sp1     | 378.5      |      |
| mix           | 0.400       | wp1     | 1800.8     |      |
| PRESATURATION |             | rfl     | 503.2      |      |
| satmode       | nmmn        | rfp     | 0          |      |
| satpwr        | 0           | rfl1    | 501.4      |      |
| satdly        | 0           | rfp1    | 0          |      |
| satfrq        | 0           | PLOT    |            |      |
| DECOUPLER     |             | wc      | 155.0      |      |
| dn            | C13         | sc      | 10.0       |      |
| dm            | nmn         | wc2     | 155.0      |      |
|               |             | sc2     | 0          |      |
|               |             | vs      | 567        |      |
|               |             | th      |            |      |
|               |             | al      |            |      |
|               |             | ph      |            |      |

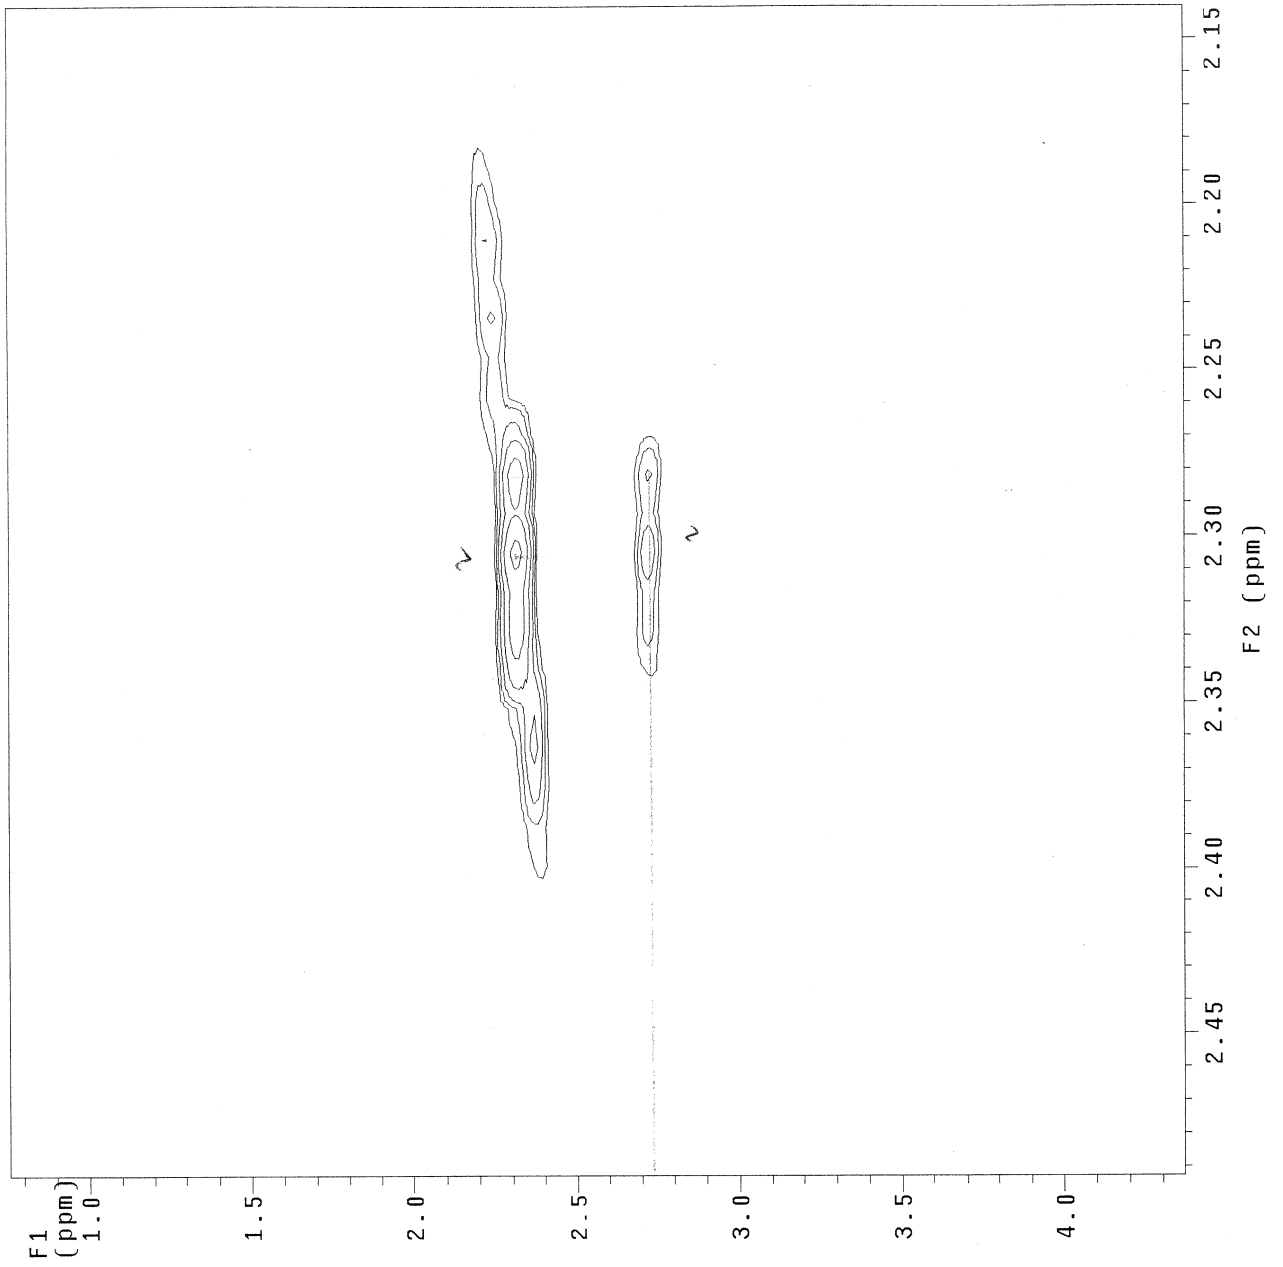

H1 stdpar RT idpfg\_5mm inova500

exp8 NOESY

|                |            |               |          |
|----------------|------------|---------------|----------|
| SAMPLE         | Nov 2 2007 | hs            | in       |
| date           | Nov 2 2007 | sspul         | y        |
| solvent        | CD300      | pcfglg        | 2000     |
| sample         | undefined  | hsglv1        | SPECIAL  |
| ACQUISITION    | 6000.6     | temp          | not used |
| sw             | 0.171      | gain          | 32       |
| at             | 2048       | spin          | 0        |
| np             | not used   | F2 PROCESSING |          |
| fb             | 32         | gf            | 0.079    |
| ss             | 1.000      | gfs           | not used |
| dl             | 1.000      | fn            | 2048     |
| nt             | 0.16       | gf1           | 0.031    |
| 2D ACQUISITION | 6000.6     | fn1           | 2048     |
| sw1            | 192        | proc1         | lp       |
| ni             | 499.410    | fn1           | 2048     |
| TRANSMITTER    | H1         | DISP          | 2511.8   |
| tn             | 52         | sp            | 211.2    |
| sfrq           | 10.800     | wp            | 525.1    |
| tof            | 0.400      | wp1           | 2387.3   |
| tpwr           | 0          | rfl           | 503.2    |
| pw             | NOESY      | rff           | 0        |
| mix            | 0.400      | rfl1          | 501.4    |
| PRESATURATION  | nnnn       | rffp1         | 0        |
| satmode        | 0          | PLOT          |          |
| satpwr         | 0          | wc            | 155.0    |
| satdly         | 0          | sc            | 10.0     |
| satf1q         | 0          | sc2           | 155.0    |
| DECOUPLER      | C13        | vs            | 567      |
| dn             | nmn        | th            |          |
| dm             | nmn        | al            | 1        |
|                |            | ph            |          |

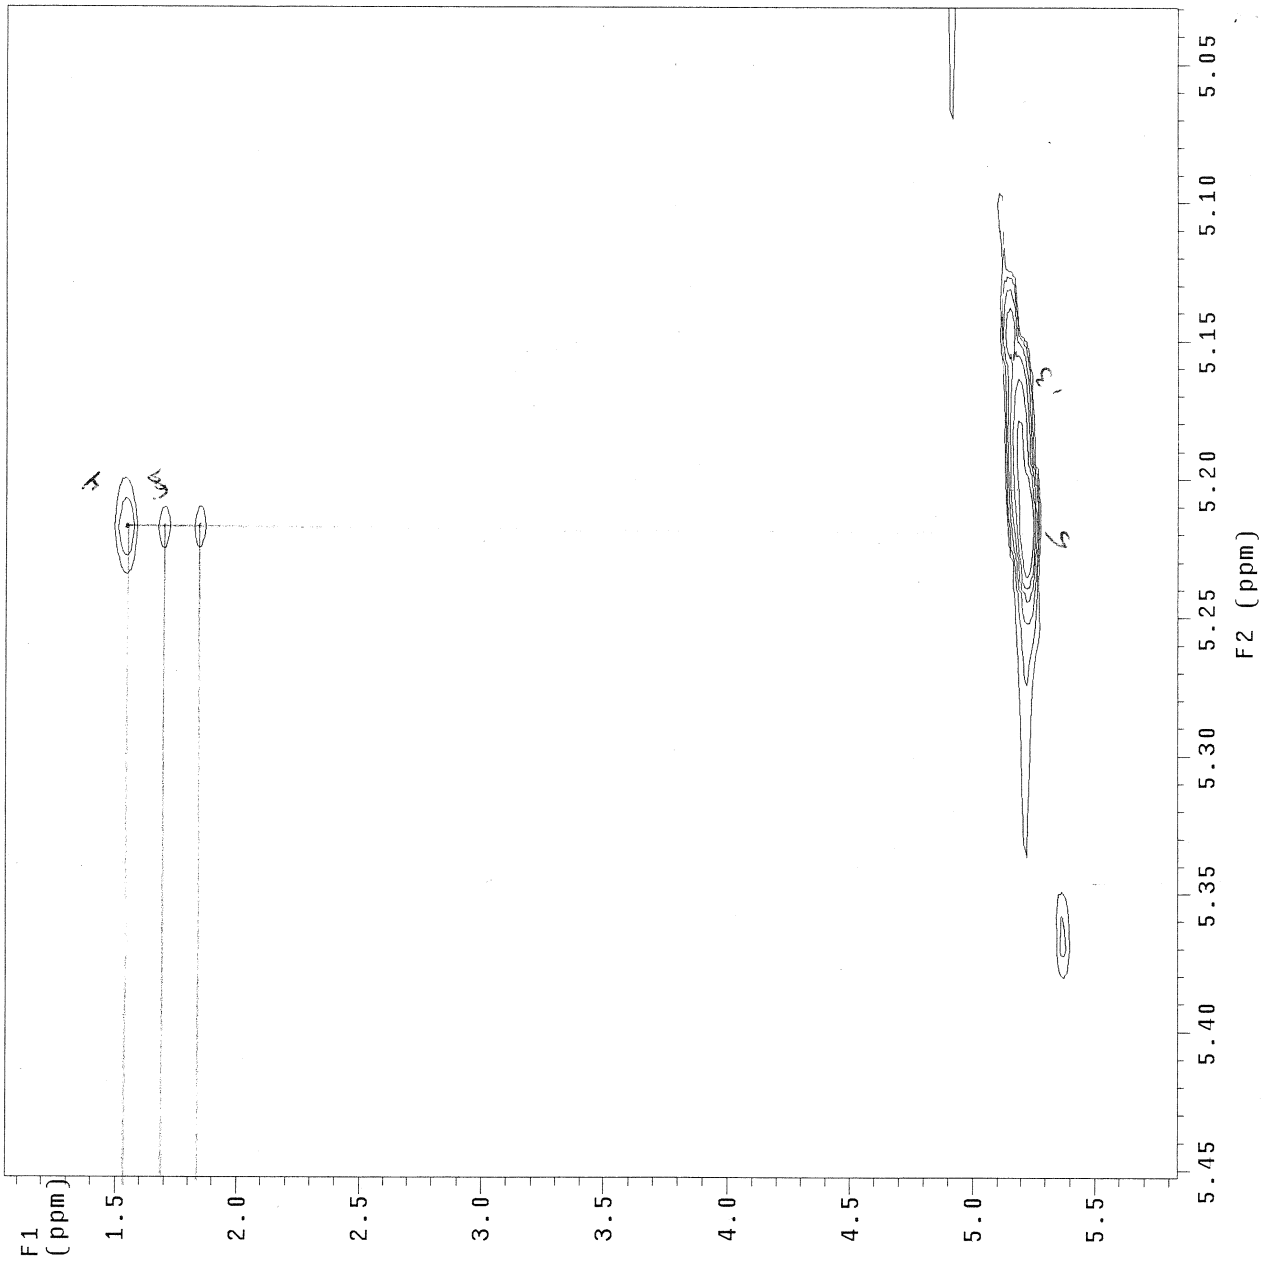

## Table Window Report

MS Formula Results: + Scan (0.360-0.457 min) - NeoPelt.d

| Mz                                  | Species        | Formula             | Abundance   |                       |                   |                       |            |
|-------------------------------------|----------------|---------------------|-------------|-----------------------|-------------------|-----------------------|------------|
| 591.32772                           | (M+H)+         | C31H47N2O9          | 160605      |                       |                   |                       |            |
| <b>Best</b>                         | <b>Formula</b> | <b>Score</b>        | <b>Mass</b> | <b>Calc. Mass</b>     | <b>Diff (ppm)</b> | <b>Abs Diff (ppm)</b> | <b>DBE</b> |
| <input checked="" type="checkbox"/> | C31H46N2O9     | 100                 | 590.32044   | 590.32033             | -0.18             | 0.18                  | 10         |
| <b>Isotope</b>                      | <b>Abund %</b> | <b>Calc Abund %</b> | <b>m/z</b>  | <b>Calculated m/z</b> | <b>Diff (ppm)</b> |                       |            |
| 1                                   | 100            | 100                 | 591.32772   | 591.32761             | -0.18             |                       |            |
| 2                                   | 29.13          | 35.14               | 592.33123   | 592.33088             | -0.58             |                       |            |
| 3                                   | 4.74           | 7.84                | 593.33173   | 593.33362             | 3.18              |                       |            |
| 4                                   | 0.67           | 1.31                | 594.33161   | 594.33629             | 7.88              |                       |            |

|                          |                |                     |             |                       |                   |                       |            |
|--------------------------|----------------|---------------------|-------------|-----------------------|-------------------|-----------------------|------------|
| <b>Best</b>              | <b>Formula</b> | <b>Score</b>        | <b>Mass</b> | <b>Calc. Mass</b>     | <b>Diff (ppm)</b> | <b>Abs Diff (ppm)</b> | <b>DBE</b> |
| <input type="checkbox"/> | C27H50N2O10Si  | 69.47               | 590.32044   | 590.32347             | 5.14              | 5.14                  | 5          |
| <b>Isotope</b>           | <b>Abund %</b> | <b>Calc Abund %</b> | <b>m/z</b>  | <b>Calculated m/z</b> | <b>Diff (ppm)</b> |                       |            |
| 1                        | 100            | 100                 | 591.32772   | 591.33075             | 5.13              |                       |            |
| 2                        | 29.13          | 35.98               | 592.33123   | 592.3335              | 3.83              |                       |            |
| 3                        | 4.74           | 11.59               | 593.33173   | 593.33358             | 3.11              |                       |            |
| 4                        | 0.67           | 2.62                | 594.33161   | 594.33474             | 5.27              |                       |            |

| Mz                                  | Species        | Formula             | Abundance   |                       |                   |                       |            |
|-------------------------------------|----------------|---------------------|-------------|-----------------------|-------------------|-----------------------|------------|
| 613.30954                           | (M+Na)+        | C31H46N2O9Na        | 110371      |                       |                   |                       |            |
| <b>Best</b>                         | <b>Formula</b> | <b>Score</b>        | <b>Mass</b> | <b>Calc. Mass</b>     | <b>Diff (ppm)</b> | <b>Abs Diff (ppm)</b> | <b>DBE</b> |
| <input checked="" type="checkbox"/> | C31H46N2O9     | 100                 | 590.32032   | 590.32033             | 0.02              | 0.02                  | 10         |
| <b>Isotope</b>                      | <b>Abund %</b> | <b>Calc Abund %</b> | <b>m/z</b>  | <b>Calculated m/z</b> | <b>Diff (ppm)</b> |                       |            |
| 1                                   | 100            | 100                 | 613.30954   | 613.30955             | 0.02              |                       |            |
| 2                                   | 27.1           | 35.13               | 614.31359   | 614.31283             | -1.25             |                       |            |
| 3                                   | 4.43           | 7.84                | 615.3117    | 615.31556             | 6.27              |                       |            |
| 4                                   | 0.73           | 1.31                | 616.30731   | 616.31823             | 17.72             |                       |            |

|                          |                |                     |             |                       |                   |                       |            |
|--------------------------|----------------|---------------------|-------------|-----------------------|-------------------|-----------------------|------------|
| <b>Best</b>              | <b>Formula</b> | <b>Score</b>        | <b>Mass</b> | <b>Calc. Mass</b>     | <b>Diff (ppm)</b> | <b>Abs Diff (ppm)</b> | <b>DBE</b> |
| <input type="checkbox"/> | C27H50N2O10Si  | 71.25               | 590.32032   | 590.32347             | 5.35              | 5.35                  | 5          |
| <b>Isotope</b>           | <b>Abund %</b> | <b>Calc Abund %</b> | <b>m/z</b>  | <b>Calculated m/z</b> | <b>Diff (ppm)</b> |                       |            |
| 1                        | 100            | 100                 | 613.30954   | 613.31269             | 5.14              |                       |            |
| 2                        | 27.1           | 35.97               | 614.31359   | 614.31544             | 3.01              |                       |            |
| 3                        | 4.43           | 11.59               | 615.3117    | 615.31552             | 6.21              |                       |            |
| 4                        | 0.73           | 2.62                | 616.30731   | 616.31668             | 15.2              |                       |            |

# Plot Window Report

+ Scan (0.360-0.457 min, 7 scans) NeoPelt.d

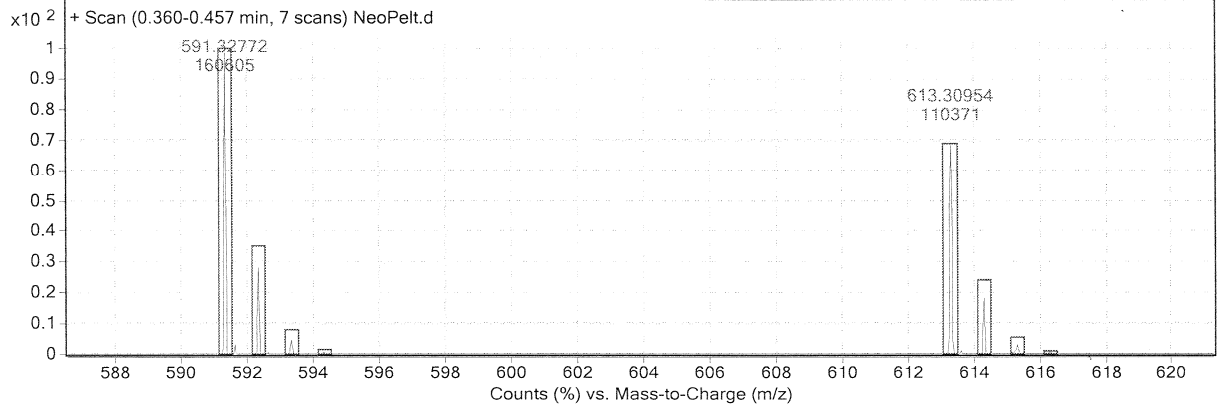

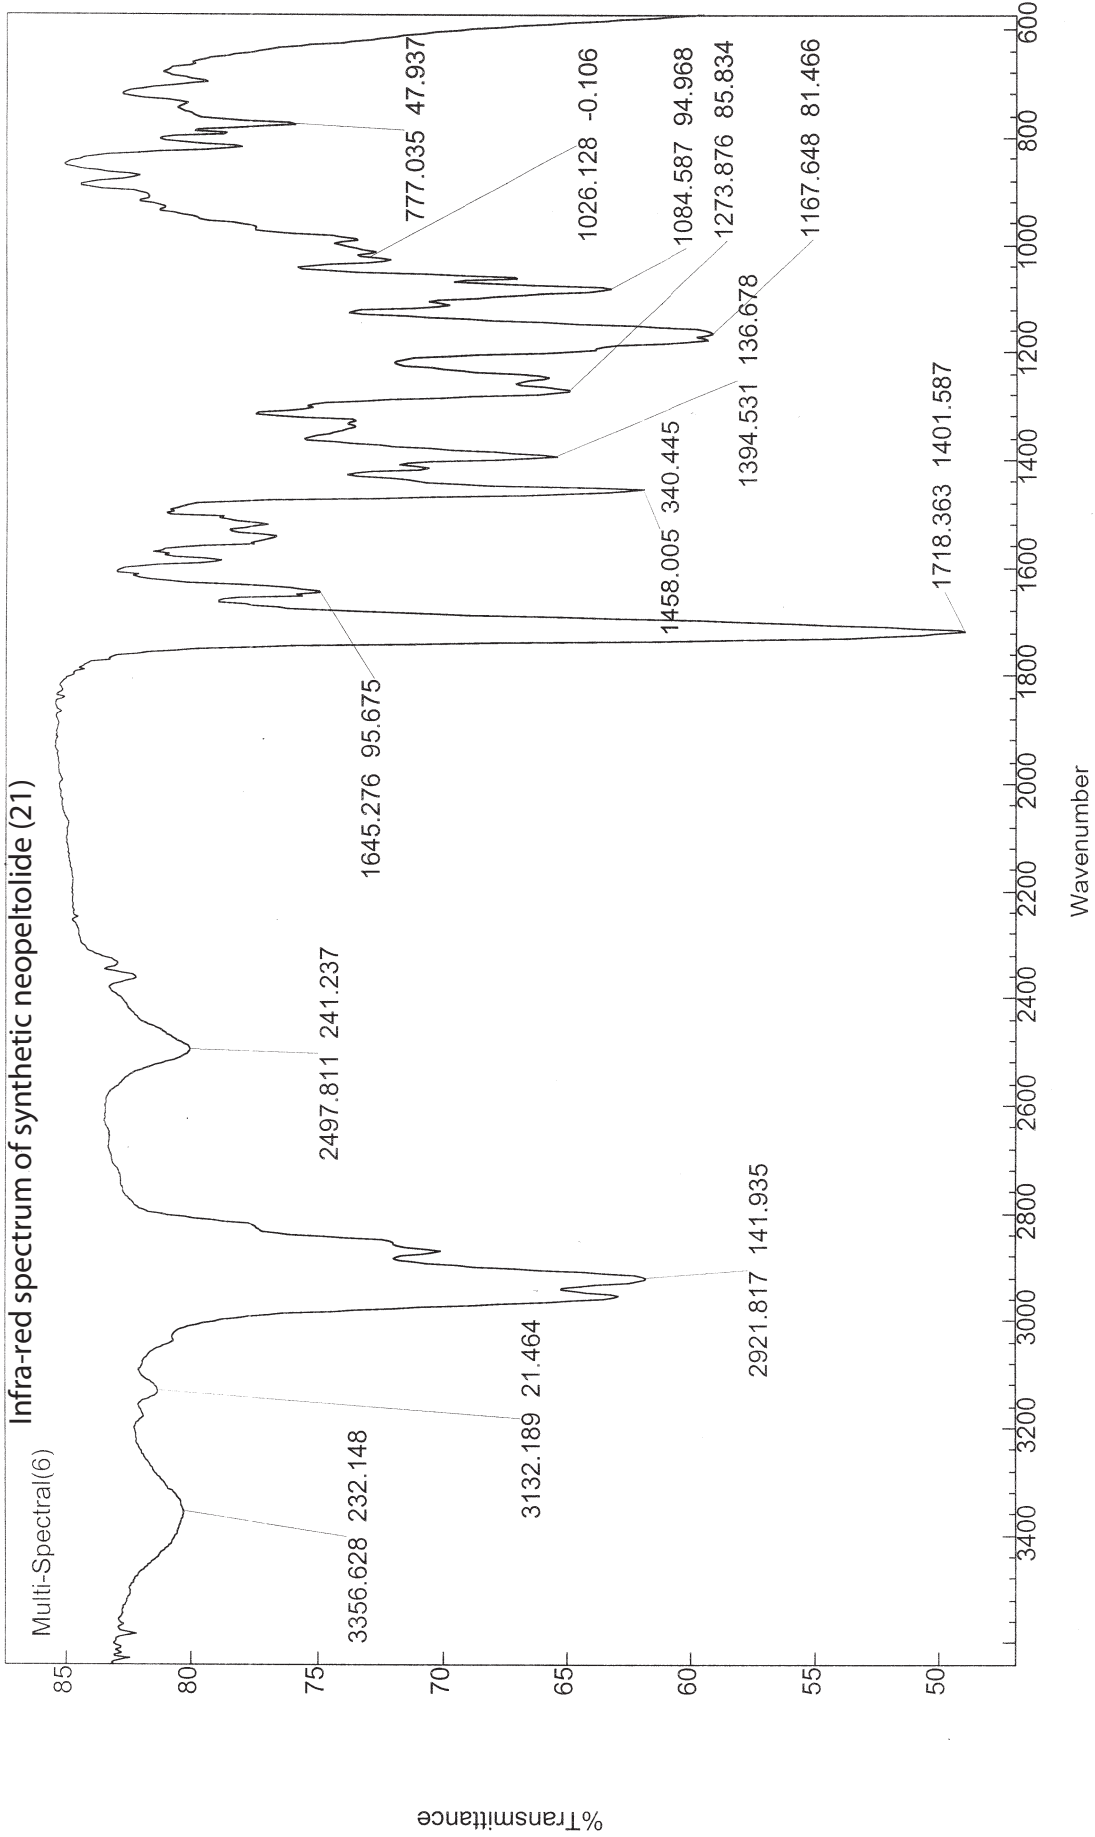

|                   |
|-------------------|
| Name              |
| Multi-Spectral(6) |

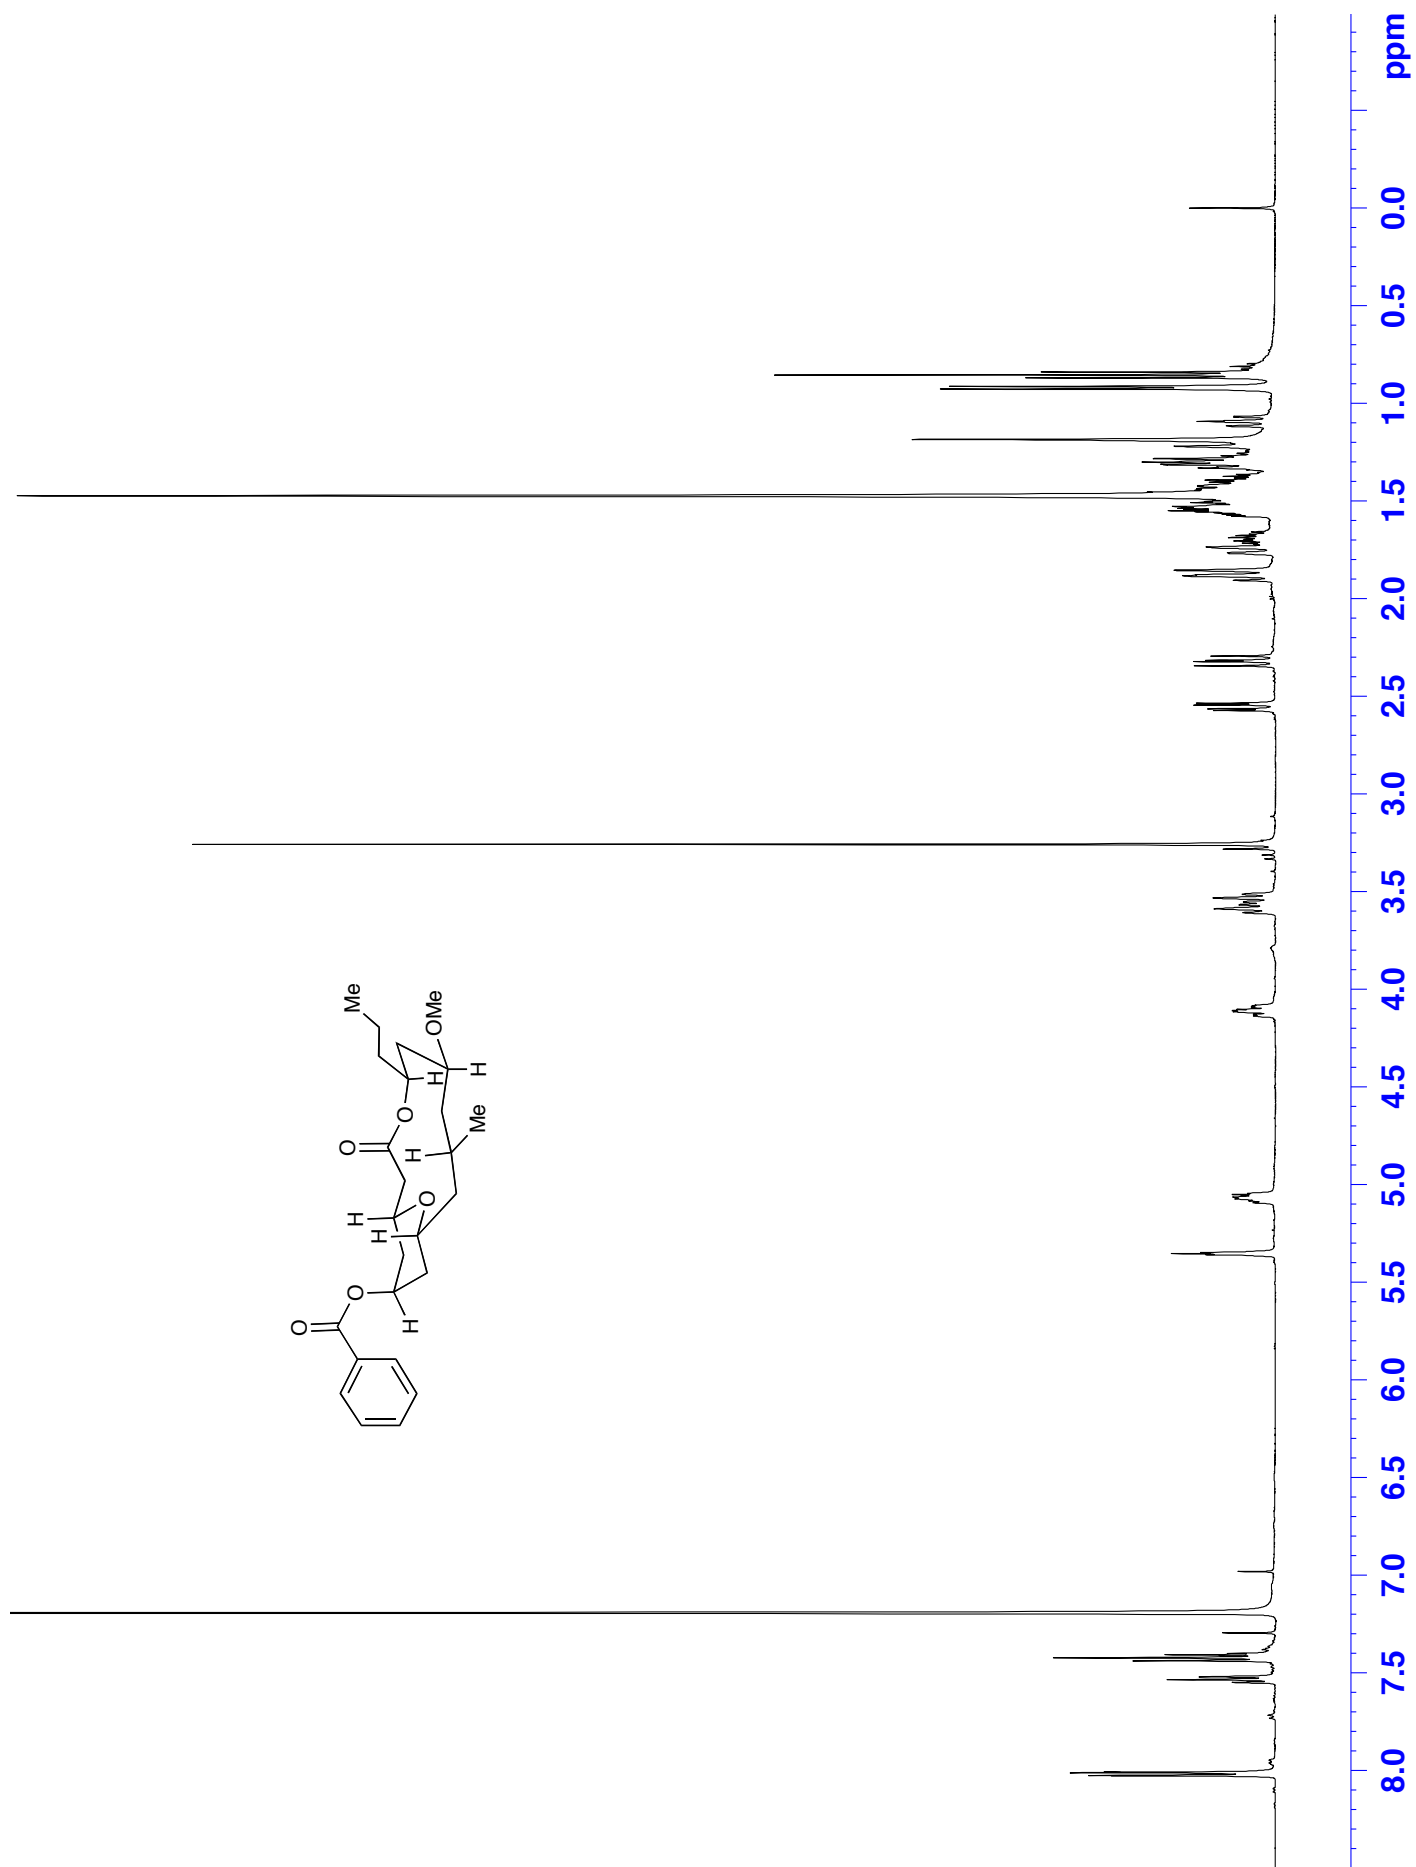

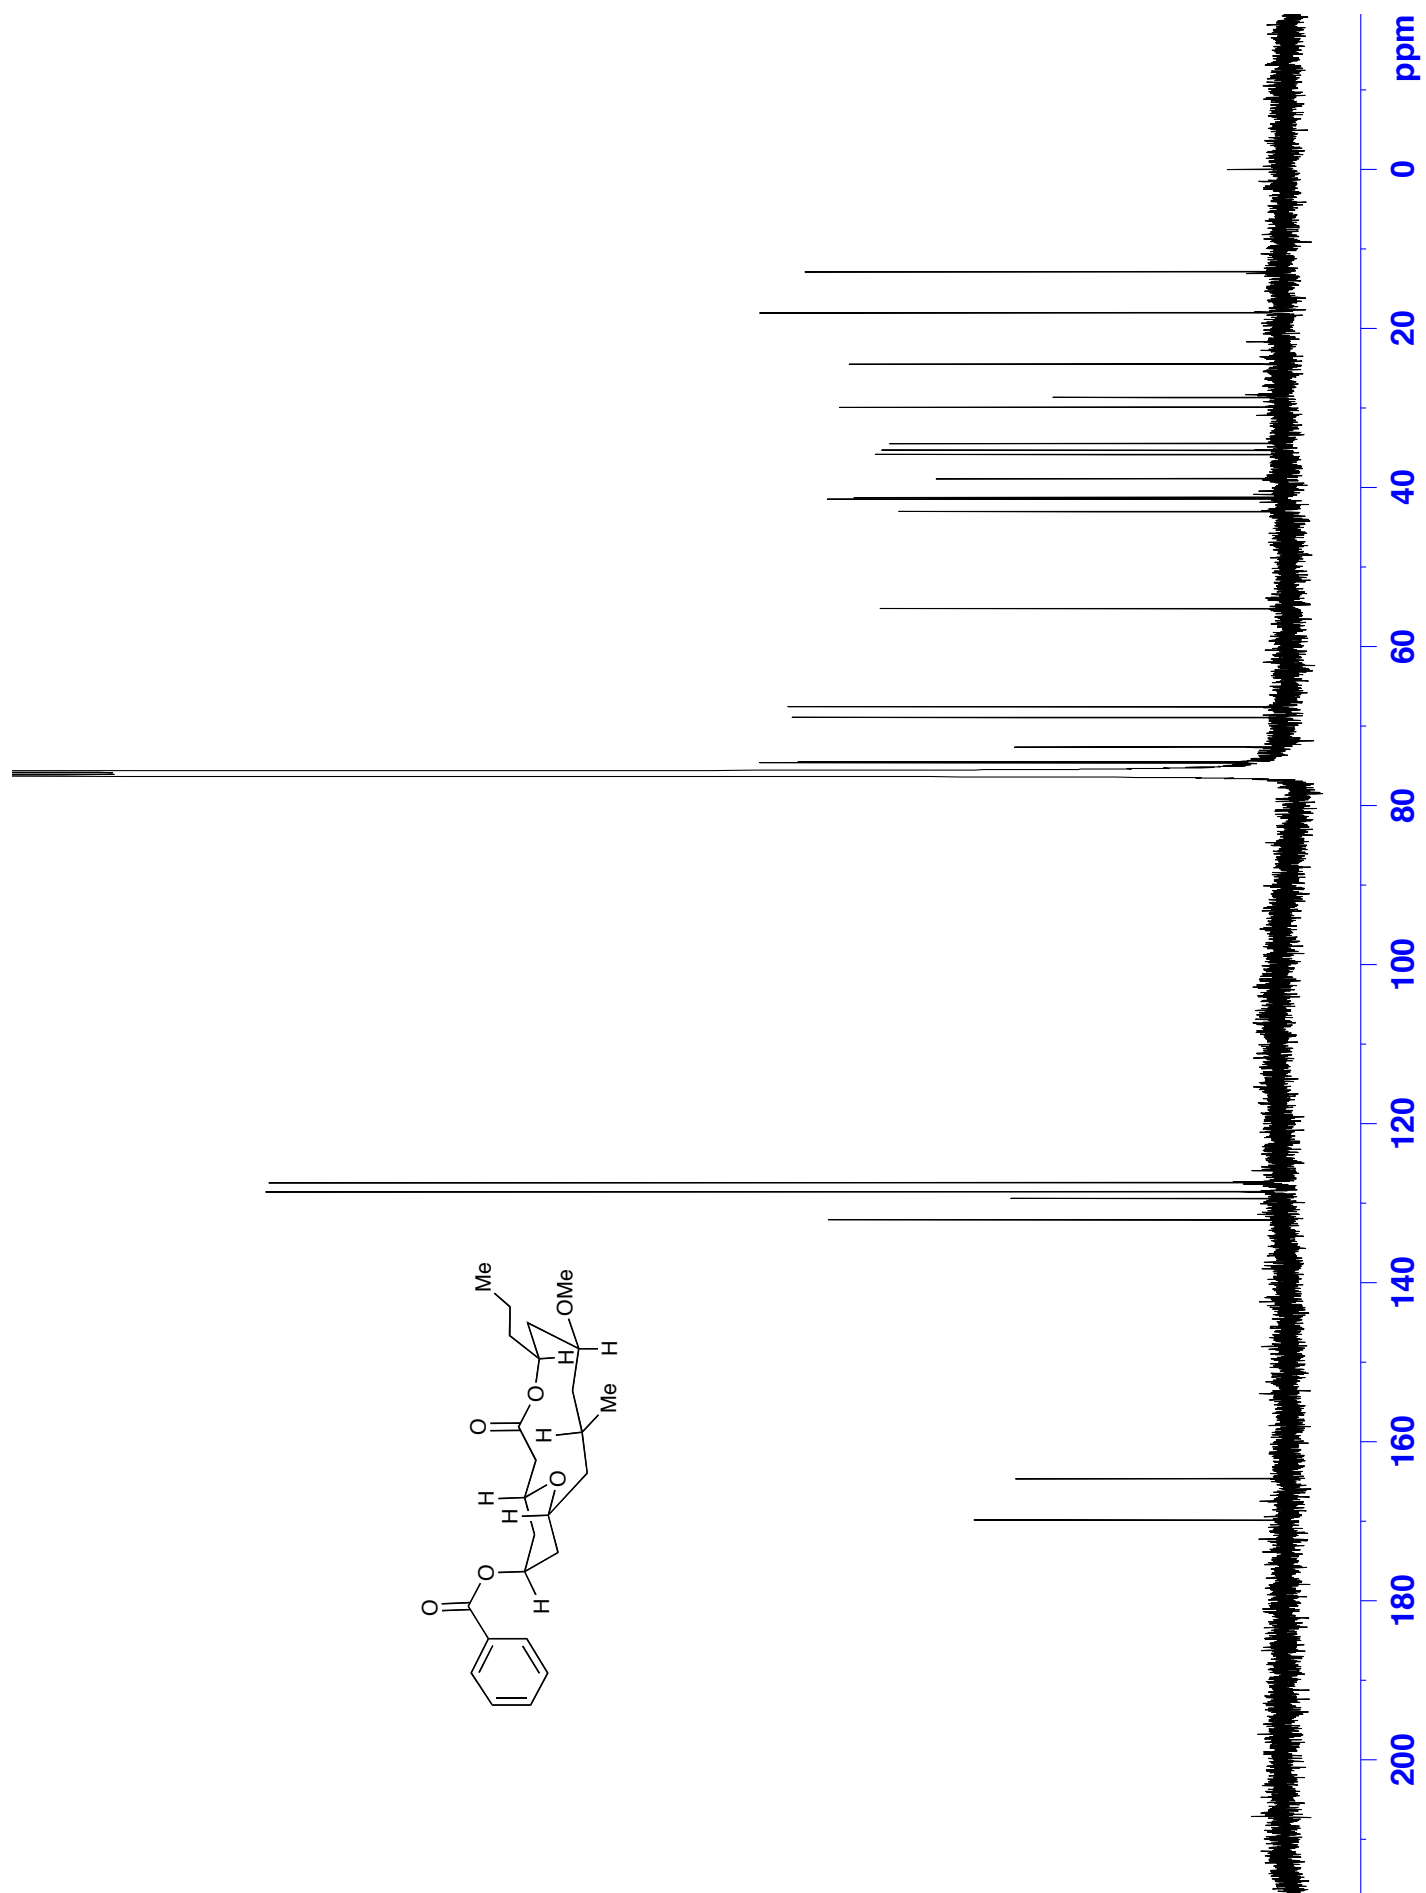

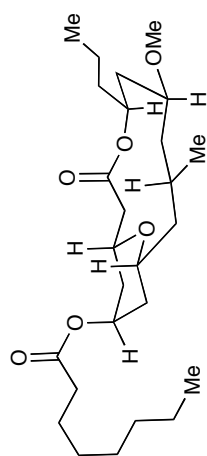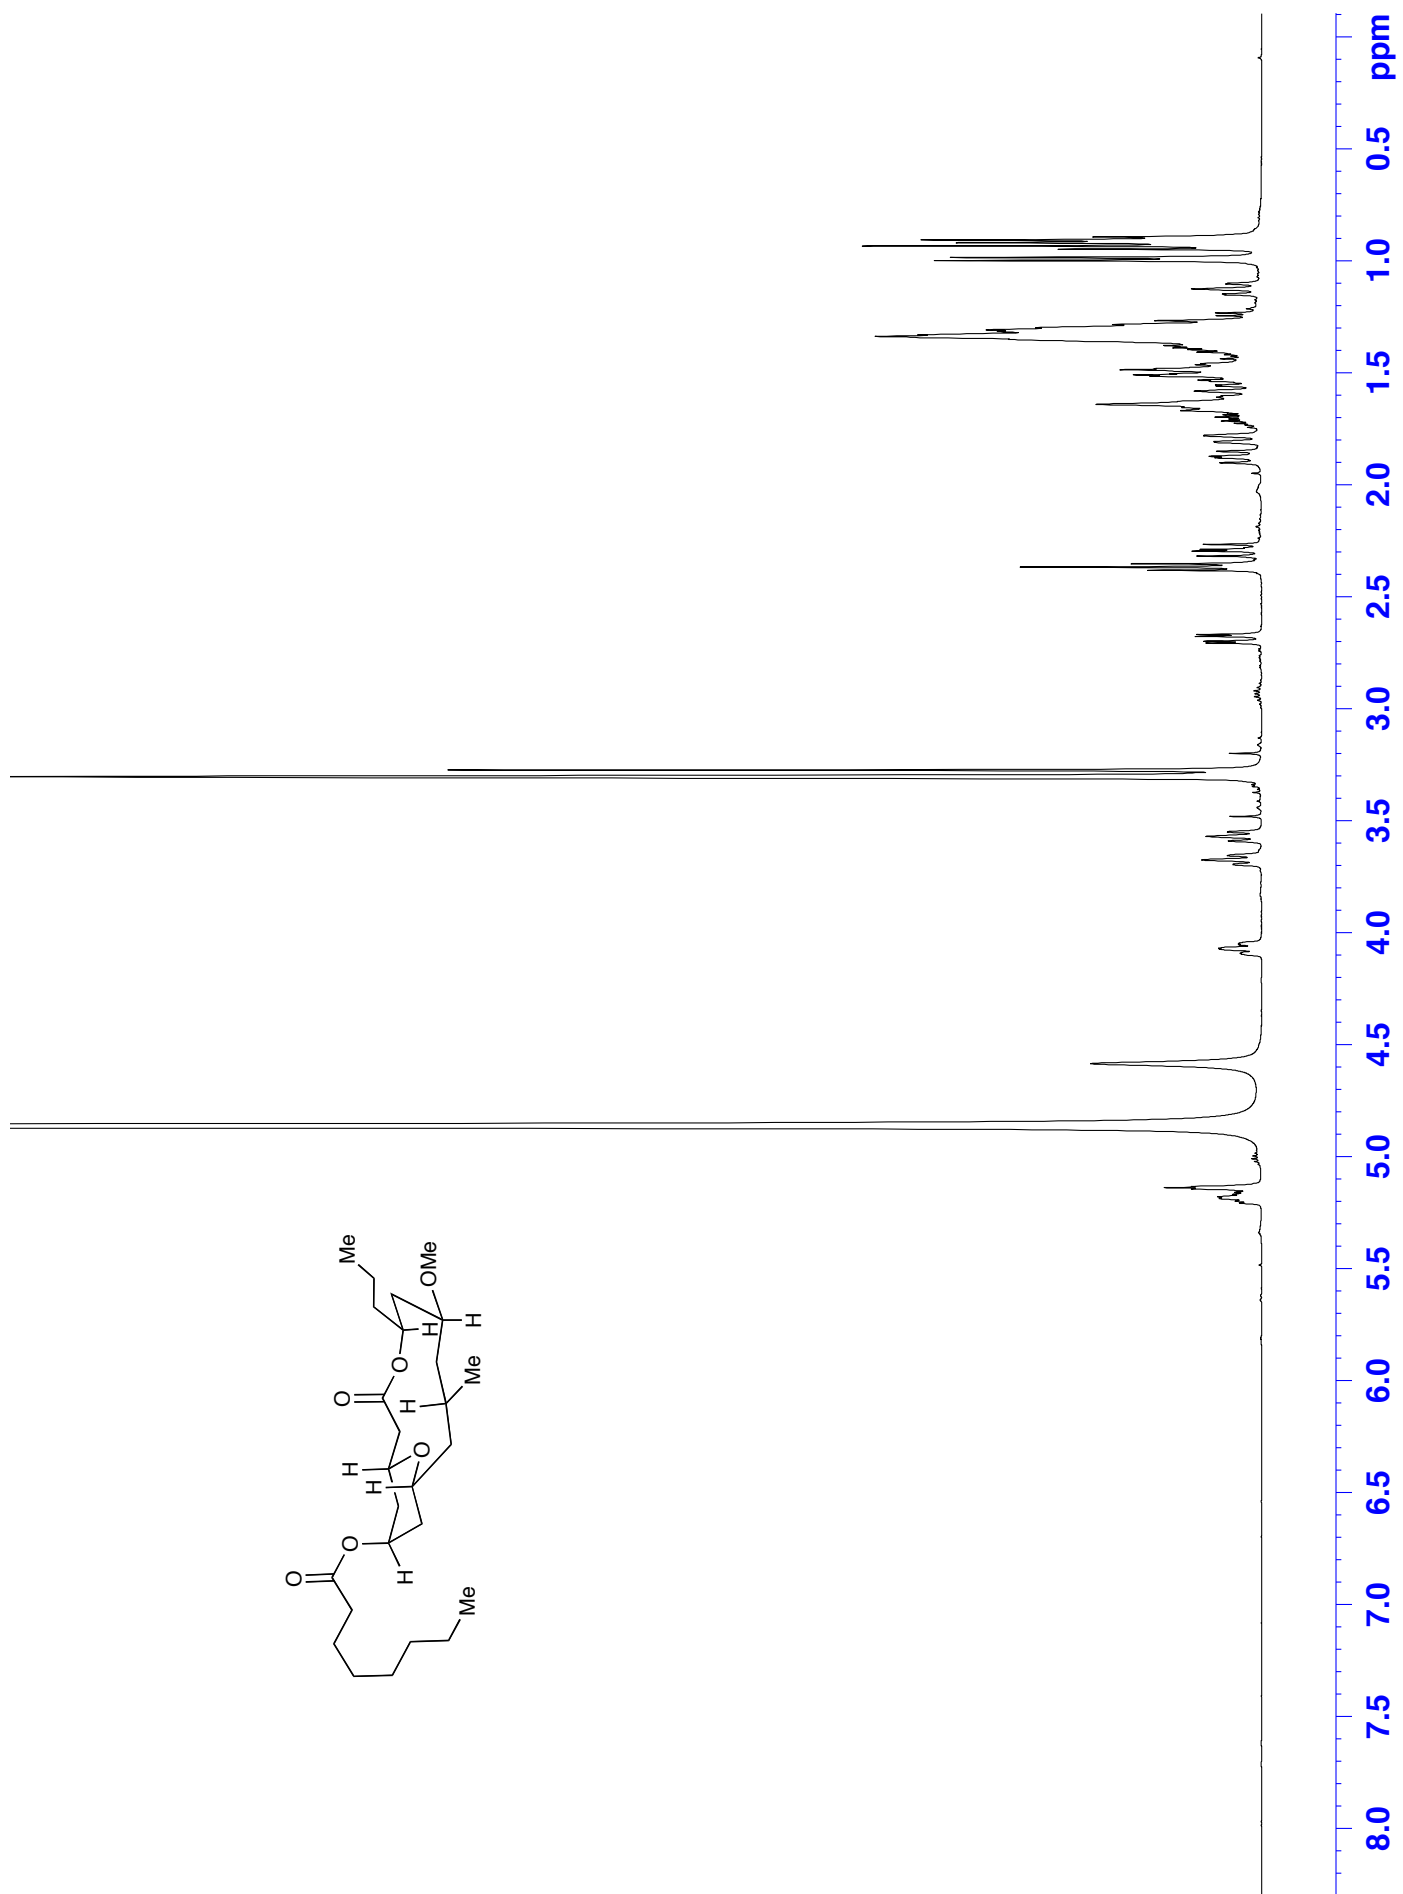



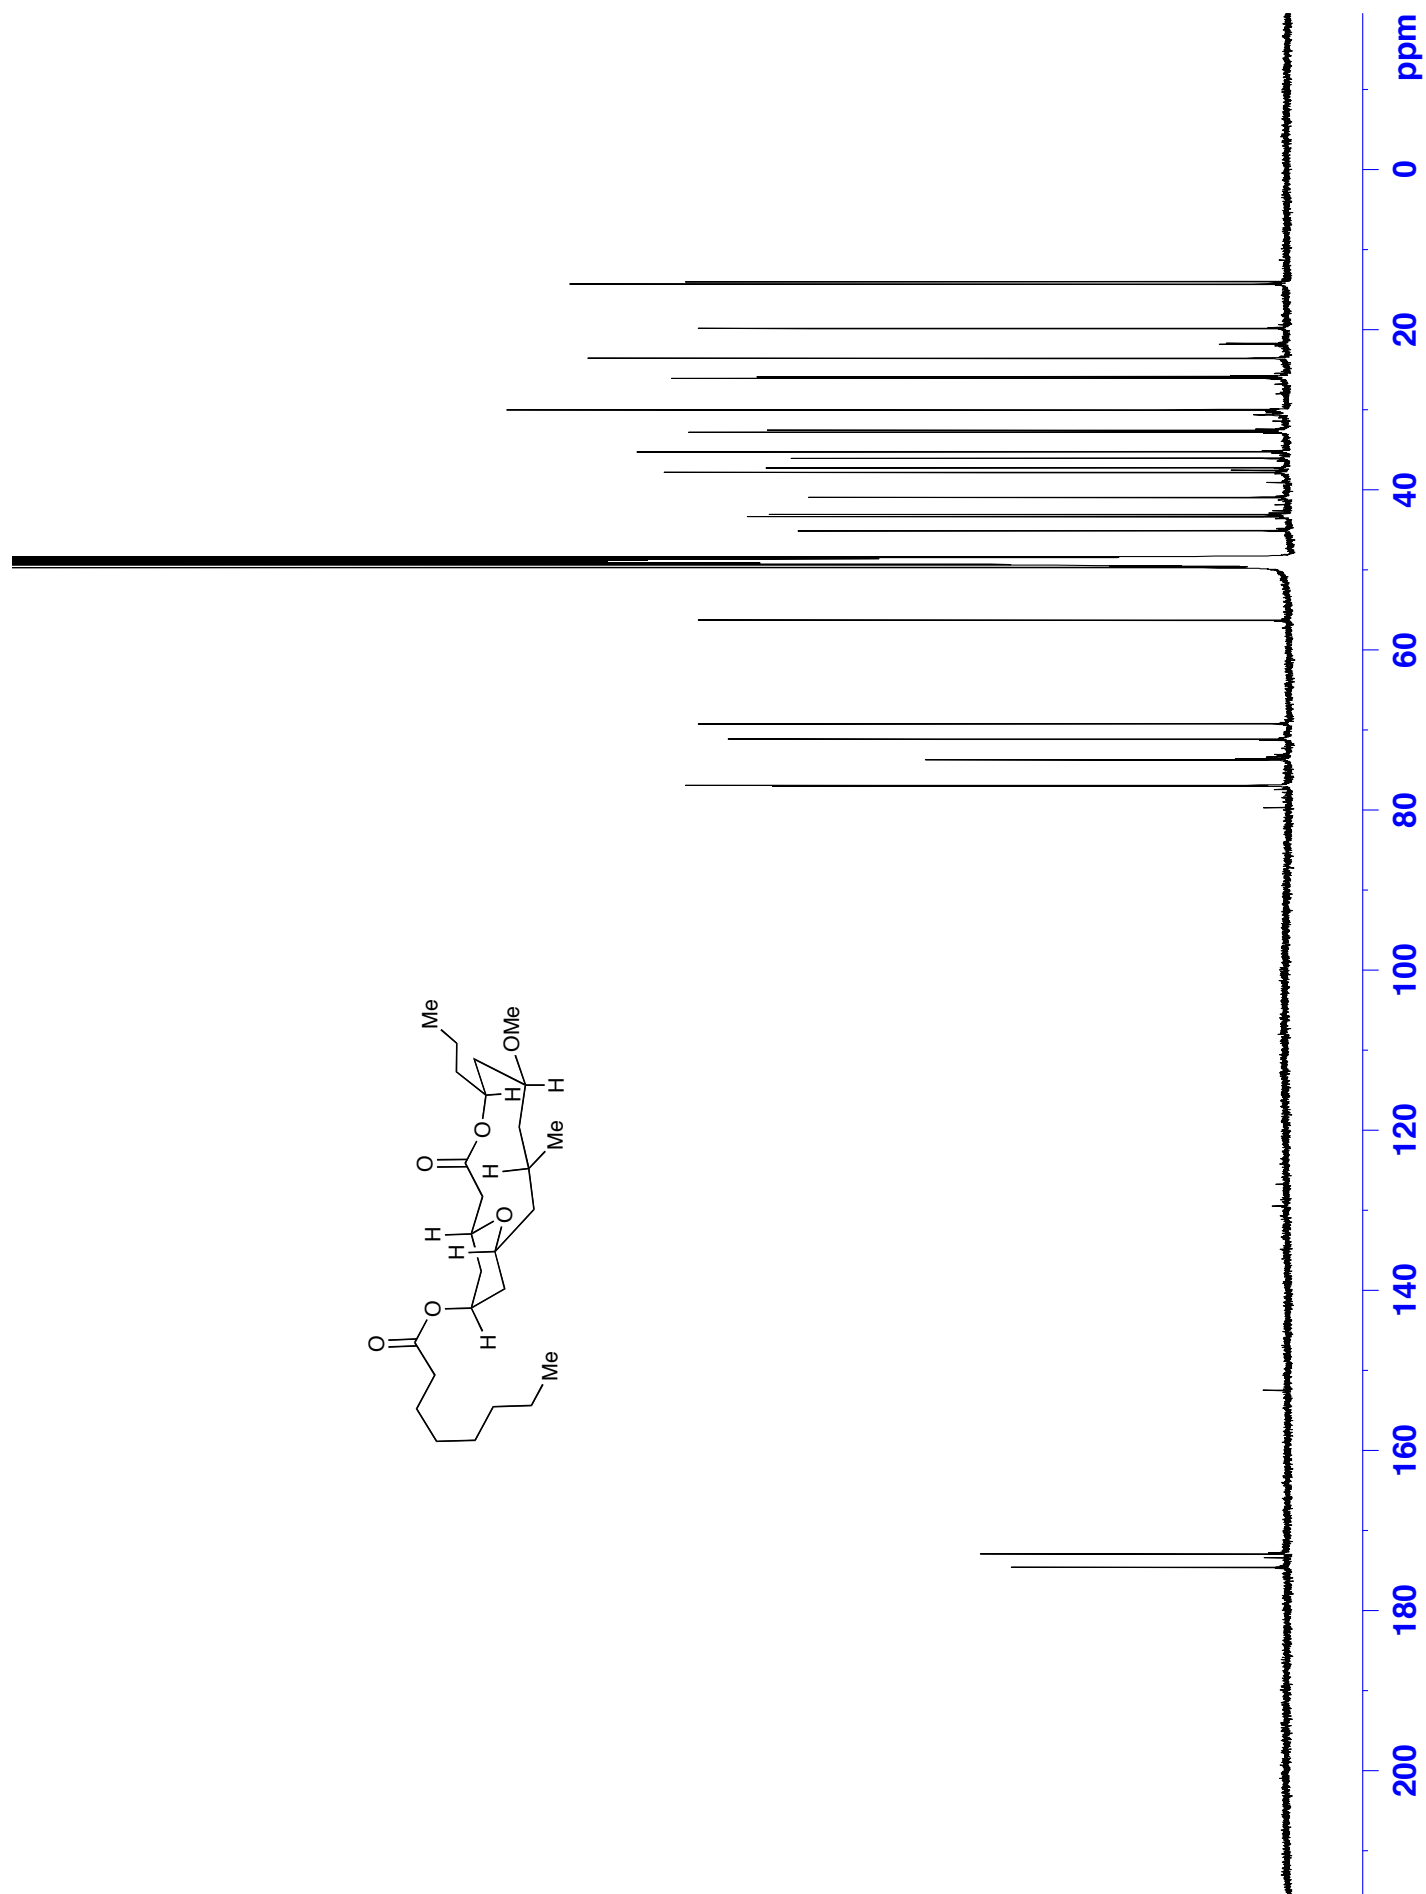

Supplement: NIHMS137472-supplement-1_si_001.pdf [file NIHMS137472-supplement-1_si_001.pdf]
